# Supplementary material for: Synthesis, binding affinity and structure–activity relationships of novel, selective and dual targeting CCR2 and CCR5 receptor antagonists
Source: Royal Society of Chemistry journal article supplement (doi:10.1039/c4ob02397h), 2014-12-16
Supplement: c4ob02397h1.pdf [file c4ob02397h1.pdf]

## **Supporting Information**

### **Synthesis, Binding Affinity and Structure-Activity Relationships of Novel, Selective and Dual Targeting CCR2 and CCR5 Receptor Antagonists**

Anna Junker, Artur Kamil Kokornaczyk, Annelien J.M. Zweemer, Bastian Frehland, Dirk Schepmann, Junichiro Yamaguchi, Kenichiro Itami, Andreas Faust, Sven Hermann, Stefan Wagner, Michael Schäfers, Michael Koch, Christina Weiss, Laura H. Heitman, Klaus Kopka, Bernhard Wunsch\*

| Content                                                                                 | page |
|-----------------------------------------------------------------------------------------|------|
| 1. Purity data of the test compounds                                                    | S3   |
| 2. Experimental, Chemistry                                                              | S4   |
| 2.1. General                                                                            | S4   |
| 2.2. Synthetic procedures                                                               | S4   |
| 3. Experimental Pharmacology                                                            | S24  |
| 4. $^1\text{H}$ and $^{13}\text{C}$ and gHSQC NMR spectra, HPLC analysis and MS spectra | S28  |

**1. Purity data of the test compounds**

| compd.     | purity by HPLC |
|------------|----------------|
| <b>6</b>   | 99 %           |
| <b>8a</b>  | 99 %           |
| <b>8b</b>  | 99 %           |
| <b>8c</b>  | >97 %          |
| <b>8d</b>  | >95 %          |
| <b>8e</b>  | 97 %           |
| <b>8f</b>  | >95 %          |
| <b>9a</b>  | 95 %           |
| <b>9b</b>  | 95 %           |
| <b>9c</b>  | 99 %           |
| <b>9d</b>  | 98 %           |
| <b>9e</b>  | 99 %           |
| <b>9f</b>  | 99 %           |
| <b>9g</b>  | >99 %          |
| <b>9h</b>  | 96 %           |
| <b>9j</b>  | 98 %           |
| <b>9k</b>  | 99 %           |
| <b>9l</b>  | 97 %           |
| <b>9m</b>  | 98 %           |
| <b>9o</b>  | 96 %           |
| <b>9p</b>  | 96 %           |
| <b>9v</b>  | 98 %           |
| <b>14a</b> | 95 %           |
| <b>14b</b> | 95 %           |
| <b>14d</b> | 97 %           |
| <b>14g</b> | >97 %          |
| <b>14h</b> | 95 %           |

## 2. Experimental, Chemistry

### 2.1. Chemistry General

Unless otherwise noted, moisture-sensitive reactions were conducted under dry nitrogen. THF and 1,4-dioxane were dried with sodium/benzophenone and freshly distilled before use. Flash column chromatography (fc): Silica gel 60, 40–64  $\mu\text{m}$ ; parentheses include: eluent,  $R_f$  value. Melting point: melting point apparatus Stuart Scientific® SMP 3, uncorrected. IR: IR spectrophotometer FT-ATR-IR (Jasco®).  $^1\text{H}$  NMR (400 MHz): Unity Mercury Plus 400 spectrometer (Varian®), AV400 (Bruker®), JEOL JNM-ECA-400.  $^{13}\text{C}$  NMR (100 MHz): Unity Mercury plus 400 spectrometer (Varian®) JEOL JNM-ECA-400;  $\delta$  in ppm relative to tetramethylsilane; coupling constants are given with 0.5 Hz resolution, the assignments of  $^{13}\text{C}$  and  $^1\text{H}$  NMR signals were supported by 2D NMR techniques; MS: APCI = atmospheric pressure chemical ionization, EI = electron impact, ESI = electro-spray ionization: MicroTof (Bruker Daltronics, Bremen), calibration with sodium formate clusters before measurement. HPLC method for determination of the product purity: Merck Hitachi Equipment; UV detector: L-7400; autosampler: L-7200; pump: L-7100; degasser: L-7614; Method: column: LiChrospher® 60 RP-select B (5  $\mu\text{m}$ ), 250x4 mm<sup>2</sup> column; flow rate: 1.00 mL/min; injection volume: 5.0  $\mu\text{L}$ ; detection at  $\lambda = 210$  nm; solvents: A: water with 0.05 % (v/v) trifluoroacetic acid; B: acetonitrile with 0.05 % (v/v) trifluoroacetic acid: gradient elution: (A %): 0-4 min: 90 % , 4-29 min: gradient from 90 % to 0 %, 29-31 min: 0 %, 31-31.5 min: gradient from 0 % to 90 %, 31.5-40 min: 90 %. Thin layer chromatography (tlc): all reactions were monitored by tlc. Tlc aluminium foils (by Merck®, silica gel 60 F<sub>254</sub>) were used in tlc chambers in saturated atmosphere at rt. The spots were visualized using UV light (254 nm). The reported  $R_f$  values should be taken as approximate values. The ratio of (highly volatile) solvent mixtures strongly depend on temperature and opening the tlc chamber might change the solvent composition and hence the  $R_f$  value.

### 2.2. Synthetic procedures

#### General procedure A: Suzuki-Miyaura cross-coupling

A 20 mL Schlenk flask was equipped with a Dimroth condenser, a magnetic stirring bar and closed. The flask was flame-dried *in vacuo* and filled with N<sub>2</sub>. Under a permanent flow of N<sub>2</sub>, amide **7** (1 eq.), PdCl<sub>2</sub>(dppf) (5 mol%), base (K<sub>2</sub>CO<sub>3</sub>, KOAc, NaOCH<sub>3</sub>) (2 eq.) and arylboronic acid (1.1-1.5 eq.) were suspended in dry dimethoxyethane (5-15 mL). The flask was sealed and heated to reflux for 12 h. After cooling to rt, the mixture was



filtered through a short silica pad (EtOAc). The filtrate was concentrated *in vacuo* to give the crude product, which was purified by fc. Recrystallization from acetonitrile afforded the final product.

**2-(4-Methylphenyl)-6,7-dihydro-5H-benzo[7]annulene-8-carboxylic acid<sup>37</sup> (6)**

A 50 mL Schlenk flask was equipped with a Dimroth condenser, a magnetic stirring bar and closed. The flask was flame-dried *in vacuo* and filled with N<sub>2</sub>. Under a permanent flow of N<sub>2</sub>, ester **3** (1.0 g, 3.5 mmol), PdCl<sub>2</sub>(dppf) (130 mg, 0.17 mmol, 5 mol%), KOAc (700 mg, 7.0 mmol, 2 eq.) and 4-methylphenylboronic acid (525 mg, 3.85 mmol, 1.1 eq.) were suspended in dry dimethoxyethane (10 mL). The flask was sealed and heated to reflux for 12 h. After cooling down to rt, the mixture was filtered through a short silica pad (EtOAc). The filtrate was concentrated *in vacuo* to give the crude product as a brown oil, which was purified by fc (EtOAc : MeOH = 95:5) to yield 1.02 g (99 %) of the ester **5** as a colorless oil. The ester **5** (1.02 g, 3.48 mmol) was dissolved in MeOH (50 mL) and 5 M NaOH (50 mL) was added. The mixture was heated to reflux for 3 h. After cooling down to rt, the mixture was concentrated *in vacuo* and acidified with conc. HCl to give a precipitate. The solid was filtered off, washed with 1 M HCl, water, dried and recrystallized from acetonitrile to give **6** as a colorless solid. R<sub>f</sub> = 0.42 (CH<sub>2</sub>Cl<sub>2</sub> : MeOH = 95:5), mp 189-190 °C, yield 950 mg (97 %), C<sub>19</sub>H<sub>18</sub>O<sub>2</sub> (278.3 g/mol). Purity (HPLC): 99 %, t<sub>R</sub> = 21.40 min. HRMS (APCI): m/z = calcd. for C<sub>19</sub>H<sub>19</sub>O<sub>2</sub> [MH<sup>+</sup>] 279.1380, found 279.1381. <sup>1</sup>H NMR (CDCl<sub>3</sub>): δ (ppm) = 1.92-2.17 (m, 2H, 6-CH<sub>2</sub>), 2.40 (s, 3H, CH<sub>3</sub>tolyl), 2.70 (t, *J* = 5.6 Hz, 2H, 7-CH<sub>2</sub>), 2.89 (t, *J* = 5.6 Hz, 2H, 5-CH<sub>2</sub>), 7.18-7.30 (m, 3H, 3-CH<sub>phenyl</sub>, 5-CH<sub>phenyl</sub>, 4-CH), 7.46 (dd, *J* = 7.8/2.1 Hz, 1H, 3-CH), 7.49 (d, *J* = 8.1 Hz, 2H, 2-CH<sub>phenyl</sub>, 6-CH<sub>phenyl</sub>), 7.57 (d, *J* = 2.0 Hz, 1H, 1-CH), 7.92 (s, 1H, 9-CH). <sup>13</sup>C NMR (CDCl<sub>3</sub>): δ (ppm) = 21.6 (CH<sub>3</sub>tolyl), 27.6 (C-6), 30.6 (C-7), 35.4 (C-5), 127.2 (C-2tolyl, C-6tolyl), 128.0 (C-3), 130.0 (C-3tolyl, C-5tolyl), 130.4 (C-4), 132.1 (C-1), 132.2 (C-4tolyl), 134.7 (C-4a), 137.6 (C-1tolyl), 137.9 (C-2), 139.6 (C-9a), 142.3 (C-9), 142.6 (C-8), 174.3 (O=C-OH). FT-IR (neat):  $\tilde{\nu}$  (cm<sup>-1</sup>) = 2920, 2840 (C-H<sub>alkyl</sub>), 2634, 2549 (COOH), 1732, 1680 (C=O).

**2-(4-Methylphenyl)-N-{4-[N-methyl-N-(tetrahydro-2H-pyran-4-yl)aminomethyl]phenyl}-6,7-dihydro-5H-benzo[7]annulene-8-carboxamide<sup>39</sup> (8a)**

According to general procedure A amide **7** (200 mg, 0.42 mmol), PdCl<sub>2</sub>(dppf) (20 mg, 0.02 mmol, 5 mol%), K<sub>2</sub>CO<sub>3</sub> (174 mg, 1.26 mmol, 3 eq.) and 4-methylphenylboronic acid

(86 mg, 0.63 mmol, 1.5 eq.) were suspended in dry dimethoxyethane (15 mL). The crude product was purified by fc (EtOAc : MeOH = 95:5) and recrystallized from acetonitrile to give **8a** as a colorless solid.  $R_f$  = 0.28 (CH<sub>2</sub>Cl<sub>2</sub> : MeOH = 95:5), mp 160-162 °C, yield 74 mg (90 %). C<sub>32</sub>H<sub>36</sub>N<sub>2</sub>O<sub>2</sub> (480.6 g/mol). Purity (HPLC): 99 %,  $t_R$  = 21.31 min. HRMS (APCI):  $m/z$  = calcd. for C<sub>32</sub>H<sub>37</sub>N<sub>2</sub>O<sub>2</sub> [MH<sup>+</sup>] 481.2850, found 481.2835. <sup>1</sup>H NMR (CDCl<sub>3</sub>):  $\delta$  (ppm) = 1.52-1.79 (m, 4H, 3-CH<sub>2</sub>pyran, 5-CH<sub>2</sub>pyran), 2.03-2.11 (m, 2H, 6-CH<sub>2</sub>), 2.15 (s, 3H, N-CH<sub>3</sub>), 2.33 (s, 3H, CH<sub>3</sub>tolyl), 2.51-2.68 (m, 3H, 4-H<sub>pyran</sub>, 7-CH<sub>2</sub>), 2.74-2.89 (m, 2H, 5-CH<sub>2</sub>), 3.30 (td,  $J$  = 11.5/2.5 Hz, 2H, CH<sub>2</sub>axial-O-CH<sub>2</sub>axial), 3.52 (s, 2H, N-CH<sub>2</sub>), 3.89-4.02 (m, 2H, CH<sub>2</sub>equat.-O-CH<sub>2</sub>equat.), 7.13-7.18 (m, 3H, 4-CH, 3-H<sub>tolyl</sub>, 5-H<sub>tolyl</sub>), 7.25 (d,  $J$  = 8.4 Hz, 2H, 3-H<sub>phenyl</sub>, 5-H<sub>phenyl</sub>), 7.31-7.39 (m, 2H, 3-CH, 9-CH), 7.41 (d,  $J$  = 8.1 Hz, 2H, 2-H<sub>tolyl</sub>, 6-H<sub>tolyl</sub>), 7.44 (d,  $J$  = 1.9 Hz, 1H, 1-CH), 7.50 (d,  $J$  = 8.5 Hz, 2H, 2-H<sub>phenyl</sub>, 6-H<sub>phenyl</sub>), 7.65 (s, 1H, N-H). <sup>13</sup>C NMR (CDCl<sub>3</sub>):  $\delta$  (ppm) = 21.6 (CH<sub>3</sub>tolyl), 28.4 (C-6), 29.6 (C-3<sub>pyran</sub>, C-5<sub>pyran</sub>), 30.9 (C-7), 35.1 (C-5), 38.0 (N-CH<sub>3</sub>), 57.8 (Ph-CH<sub>2</sub>), 60.0 (C-4<sub>pyran</sub>), 68.2 (C-2<sub>pyran</sub>, C-6<sub>pyran</sub>), 120.5 (C-2<sub>phenyl</sub>, C-6<sub>phenyl</sub>), 127.2 (C-2<sub>tolyl</sub>, C-6<sub>tolyl</sub>), 127.3 (C-3), 129.8 (C-3<sub>tolyl</sub>, C-5<sub>tolyl</sub>), 130.0 (C-3<sub>phenyl</sub>, C-5<sub>phenyl</sub>), 130.3 (C-4), 130.3 (C-4<sub>tolyl</sub>), 131.1 (C-1), 134.7 (C-9), 135.1 (C-4a), 137.3 (C-4<sub>phenyl</sub>), 137.6 (C-1<sub>tolyl</sub>), 138.0 (C-2), 138.4 (C-1<sub>phenyl</sub>), 139.6 (C-9a), 141.9 (C-8), 168.5 (O=C-NH). FT-IR (neat):  $\tilde{\nu}$  (cm<sup>-1</sup>) = 3298 (N-H), 2970, 2920 (C-H<sub>alkyl</sub>), 1644 (C=O), 1095, 1014 (C-O).

#### **N-[4-Diethylamino)phenyl]-2-(4-methylphenyl)-6,7-dihydro-5H-benzo[7]annulene-8-carboxamide (8b)**

N<sup>1</sup>,N<sup>1</sup>-Diethylbenzene-1,4-diamine (60 mg, 0.36 mmol, 1 eq.) was added to a vigorously stirred mixture of acid **6** (100 mg, 0.36 mmol), triethylamine (73 mg, 0.72 mmol, 2 eq.) and HATU™ (153 mg, 0.40 mmol, 1.1 eq.) in THF (5 mL). The mixture was stirred overnight at rt. The mixture was concentrated *in vacuo* and the residue was purified by fc (EtOAc : CH<sub>2</sub>Cl<sub>2</sub> = 1:2 + 5% MeOH) and recrystallized from acetonitrile to give **8b** as a colorless solid.  $R_f$  = 0.91 (MeOH : CH<sub>2</sub>Cl<sub>2</sub> = 5:95), mp 153-155 °C, yield 86 mg (56 %). C<sub>29</sub>H<sub>32</sub>N<sub>2</sub>O (424.6 g/mol). Purity (HPLC): 99 %,  $t_R$  = 21.33 min. HRMS (EI):  $m/z$  = calcd. for C<sub>29</sub>H<sub>33</sub>N<sub>2</sub>O [MH<sup>+</sup>] 425.2587, found 425.2608. <sup>1</sup>H NMR (CDCl<sub>3</sub>):  $\delta$  (ppm) = 1.15 (t,  $J$  = 7.2 Hz, 6H, N(CH<sub>2</sub>CH<sub>3</sub>)<sub>2</sub>), 2.15 (quint,  $J$  = 6.3 Hz, 2H, 6-CH<sub>2</sub>), 2.40 (s, 3H, CH<sub>3</sub>tolyl), 2.71 (t,  $J$  = 6.6 Hz, 2H, 7-CH<sub>2</sub>), 2.81-2.92 (m, 2H, 5-CH<sub>2</sub>), 3.34 (q,  $J$  = 7.0 Hz, 4H, N(CH<sub>2</sub>CH<sub>3</sub>)<sub>2</sub>), 6.68 (d,  $J$  = 9.0 Hz, 2H, 3-CH<sub>phenyl</sub>, 5-CH<sub>phenyl</sub>), 7.22 (d,  $J$  = 7.8 Hz, 1H, 4-CH), 7.25 (d,  $J$  = 8.4 Hz, 2H, 3-CH<sub>tolyl</sub>, 5-CH<sub>tolyl</sub>), 7.38-7.44 (m, 4H, 3-CH, 9-CH, 2-CH<sub>phenyl</sub>, 6-CH<sub>phenyl</sub>), 7.47-7.50 (m, 3H, 2-CH<sub>tolyl</sub>, 6-CH<sub>tolyl</sub>, 1-CH), 7.51 (s, 1H, NH). <sup>13</sup>C

NMR (CDCl<sub>3</sub>):  $\delta$  (ppm) = 13.0 (N(CH<sub>2</sub>CH<sub>3</sub>)<sub>2</sub>), 21.6 (CH<sub>3</sub><sub>tolyl</sub>), 28.5 (C-6), 30.9 (C-7), 35.0 (C-5), 45.0 (N(CH<sub>2</sub>CH<sub>3</sub>)<sub>2</sub>), 112.9 (C-3<sub>phenyl</sub>, C-5<sub>phenyl</sub>), 122.8 (C-2<sub>phenyl</sub>, C-6<sub>phenyl</sub>), 127.1 (C-3), 127.2 (C-1), 129.9 (C-2<sub>tolyl</sub>, C-6<sub>tolyl</sub>), 130.2 (C-3<sub>tolyl</sub>, C-5<sub>tolyl</sub>), 131.1 (C-4), 134.2 (C-9), 135.4 (C-8), 137.5 (C-9a), 138.1 (C-1<sub>tolyl</sub>), 138.6 (C-4<sub>tolyl</sub>), 139.6 (C-2), 141.6 (C-4a), 145.7 (C-4<sub>phenyl</sub>), 164.9 (O=C-NH). A signal for the atom C-1<sub>phenyl</sub> is not visible. FT-IR (neat):  $\tilde{\nu}$  (cm<sup>-1</sup>) = 3344 (N-H), 2785 (C-H<sub>alkyl</sub>), 1627 (C=O).

**2-(4-Methylphenyl)-N-{4-[4-(tetrahydro-2H-pyran-4-yl)piperazin-1-yl]phenyl}-6,7-dihydro-5H-benzo[7]annulene-8-carboxamide (8c)**

4-[4-(Tetrahydro-2H-pyran-4-yl)piperazin-1-yl]aniline (78 mg, 0.36 mmol, 1 eq.) was added to a vigorously stirred mixture of acid **6** (100 mg, 0.36 mmol), triethylamine (110 mg, 1.08 mmol, 3 eq.) and COMU™ (232 mg, 0.54 mmol, 1.5 eq.) in acetonitrile (5 mL). The mixture was stirred overnight at rt, during which a precipitate was formed. The solid was filtered off, washed with acetonitrile and water, dried and recrystallized from acetonitrile to afford **8c** as a colorless solid. *R*<sub>f</sub> = 0.34 (MeOH : CH<sub>2</sub>Cl<sub>2</sub> = 5:95), mp 248-250 °C (dec.), yield 107 mg (53 %). C<sub>34</sub>H<sub>39</sub>N<sub>3</sub>O<sub>2</sub> (521.7 g/mol). Purity (HPLC): >97 %, *t*<sub>R</sub> = 21.05 min. HRMS (APCI): *m/z* = calcd. for C<sub>34</sub>H<sub>40</sub>N<sub>3</sub>O<sub>2</sub> [MH<sup>+</sup>] 522.3115, found 522.3092. <sup>1</sup>H NMR (CDCl<sub>3</sub>):  $\delta$  (ppm) = 1.62 (qd, *J* = 12.0/4.3 Hz, 2H, 3-CH<sub>2</sub><sub>pyran-axial</sub>, 5-CH<sub>2</sub><sub>pyran-axial</sub>), 1.76-1.86 (m, 2H, 3-CH<sub>2</sub><sub>pyran-equat</sub>, 5-CH<sub>2</sub><sub>pyran-equat</sub>), 2.15 (quint. m, *J* = 6.3 Hz, 2H, 6-CH<sub>2</sub>), 2.40 (s, 3H, CH<sub>3</sub><sub>tolyl</sub>), 2.48 (tt, *J* = 10.0/2.9 Hz, 1H, 4-H<sub>pyran</sub>), 2.67-2.78 (m, 6H, 7-CH<sub>2</sub>, 3-CH<sub>2</sub><sub>piperazin</sub>, 5-CH<sub>2</sub><sub>piperazin</sub>), 2.82-2.92 (m, 2H, 5-CH<sub>2</sub>), 3.13-3.28 (m, 4H, 2-CH<sub>2</sub><sub>piperazin</sub>, 6-CH<sub>2</sub><sub>piperazin</sub>), 3.41 (td, *J* = 11.9/1.9 Hz, 2H, CH<sub>2</sub><sub>axial</sub>-O-CH<sub>2</sub><sub>axial</sub>), 4.05 (dd, *J* = 11.5/3.9 Hz, 2H, CH<sub>2</sub><sub>equat</sub>-O-CH<sub>2</sub><sub>equat</sub>), 6.93 (d, *J* = 8.9 Hz, 2H, 3-CH<sub>phenyl</sub>, 5-CH<sub>phenyl</sub>), 7.18-7.25 (m, 3H, 4-CH, 3-CH<sub>tolyl</sub>, 5-CH<sub>tolyl</sub>), 7.40 (s, 1H, 9-CH), 7.43 (dd, *J* = 7.8/1.9 Hz, 1H, 3-CH), 7.45-7.52 (m, 5H, 1-CH, 2-CH<sub>phenyl</sub>, 6-CH<sub>phenyl</sub>, 2-CH<sub>tolyl</sub>, 6-CH<sub>tolyl</sub>), 7.53 (s, 1H, NH). <sup>13</sup>C NMR (CDCl<sub>3</sub>):  $\delta$  (ppm) = 21.6 (CH<sub>3</sub><sub>tolyl</sub>), 28.4 (C-6), 30.0 (C-3<sub>pyran</sub>, C-5<sub>pyran</sub>), 30.9 (C-5), 35.0 (C-7), 49.5 (C-2<sub>piper.</sub>, C-6<sub>piper.</sub>), 50.3 (C-3<sub>piper</sub>, C-5<sub>piper</sub>), 61.4 (C-4<sub>pyran</sub>), 67.9 (C-2<sub>pyran</sub>, C-6<sub>pyran</sub>), 117.1 (C-3<sub>phenyl</sub>, C-5<sub>phenyl</sub>), 121.9 (C-2<sub>phenyl</sub>, C-6<sub>phenyl</sub>), 127.2 (C-2<sub>tolyl</sub>, C-6<sub>tolyl</sub>), 129.1 (C-1<sub>phenyl</sub>), 130.0 (C-3<sub>tolyl</sub>, C-5<sub>tolyl</sub>), 130.3 (C-3), 131.0 (C-1), 131.1 (C-4), 134.5 (C-9), 135.2 (C-8), 137.6 (C-9a), 138.0 (C-1<sub>tolyl</sub>), 138.4 (C-4<sub>tolyl</sub>), 139.6 (C-2), 141.7 (C-4a), 148.8 (C-4<sub>phenyl</sub>), 168.6 (O=C-NH). FT-IR (neat):  $\tilde{\nu}$  (cm<sup>-1</sup>) = 3290 (N-H), 2831, 2769 (C-H<sub>alkyl</sub>), 1635 (C=O).

**2-(4-Methylphenyl)-N-{4-[N-(thiazol-2-yl)sulfamoyl]phenyl}-6,7-dihydro-5H-benzo[7]annulene-8-carboxamide (8d)**

4-Amino-N-(1,3-thiazol-2-yl)benzenesulfonamide (Sulfathiazole) (92 mg, 0.36 mmol, 1 eq.) was added to a vigorously stirred mixture of acid **6** (100 mg, 0.36 mmol), triethylamine (75 mg, 0.72 mmol, 2 eq.) and COMU™ (171 mg, 0.4 mmol, 1.1 eq.) in acetonitrile (15 mL). The mixture was concentrated *in vacuo* and the residue was purified by fc (EtOAc : CH<sub>2</sub>Cl<sub>2</sub> = 1:2 + 5% MeOH) and recrystallized from acetonitrile to afford **8d** as a colorless solid. *R*<sub>f</sub> = 0.28 (MeOH : CH<sub>2</sub>Cl<sub>2</sub> = 5:95), mp 222-224 °C (dec.), yield 45 mg (25 %). C<sub>28</sub>H<sub>25</sub>N<sub>3</sub>O<sub>3</sub>S<sub>2</sub> (515.6 g/mol). Purity (HPLC): >95 %, *t*<sub>R</sub> = 21.48 min. HRMS (APCI): *m/z* = calcd. for C<sub>28</sub>H<sub>26</sub>N<sub>3</sub>O<sub>2</sub>S<sub>2</sub> [MH<sup>+</sup>] 516.1410, found 516.1448. <sup>1</sup>H NMR (DMSO-d<sub>6</sub>): δ (ppm) = 1.95-2.05 (m, 2H, 6-CH<sub>2</sub>), 2.34 (s, 3H, CH<sub>3</sub>tolyl), 2.62 (t, *J* = 6.5 Hz, 2H, 7-CH<sub>2</sub>), 2.79-2.89 (m, 2H, 5-CH<sub>2</sub>), 6.82 (d, *J* = 4.6 Hz, 1H, 5-CH<sub>thiazol</sub>), 7.23-7.31 (m, 4H, 4-CH<sub>thiazol</sub>, 4-CH, 3-CH<sub>tolyl</sub>, 5-CH<sub>tolyl</sub>), 7.39 (s, 1H, 9-CH), 7.52 (dd, *J* = 7.8/2.0 Hz, 1H, 3-CH), 7.58 (d, *J* = 8.2 Hz, 2H, 2-CH<sub>tolyl</sub>, 6-CH<sub>tolyl</sub>), 7.68 (d, *J* = 2.0 Hz, 1H, 1-CH), 7.76 (d, *J* = 8.8 Hz, 2H, 2-CH<sub>phenyl</sub>, 6-CH<sub>phenyl</sub>), 7.87 (d, *J* = 8.9 Hz, 2H, 3-CH<sub>phenyl</sub>, 5-CH<sub>phenyl</sub>), 10.30 (s, 1H, NH), 12.69 (s, 1H, SO<sub>2</sub>NH). <sup>13</sup>C NMR (DMSO-d<sub>6</sub>): δ (ppm) = 20.5 (CH<sub>3</sub>tolyl), 27.2 (C-6), 29.9 (C-5), 33.8 (C-7), 107.7 (C-5<sub>thiazol</sub>), 119.3 (C-2<sub>phenyl</sub>, C-6<sub>phenyl</sub>), 126.1 (C-2<sub>tolyl</sub>, C-6<sub>tolyl</sub>), 126.2 (C-3), 126.6 (C-3<sub>phenyl</sub>, C-5<sub>phenyl</sub>), 129.4 (C-3<sub>tolyl</sub>, C-5<sub>tolyl</sub>), 129.7 (C-4<sub>thiazol</sub>), 129.8 (C-4, C-1), 133.8 (C-9), 134.5 (C-9a), 136.4 (C-4<sub>phenyl</sub>), 136.5 (C-4a), 136.9 (C-8), 137.8 (C-1<sub>tolyl</sub>), 137.9 (C-4<sub>tolyl</sub>), 140.9 (C-2), 142.4 (C-1<sub>phenyl</sub>), 168.5 (O=C-NH), 179.6 (C-2<sub>thiazol</sub>). FT-IR (neat):  $\tilde{\nu}$  (cm<sup>-1</sup>) = 3348 (N-H), 2773 (C-H<sub>alkyl</sub>), 1647 (C=O) 1350, 1184 (SO<sub>2</sub>-N).

**2-(4-Methylphenyl)-N-(thiazol-2-yl)-6,7-dihydro-5H-benzo[7]annulene-8-carboxamide (8e)**

2-Aminothiazole (100 mg, 1.0 mmol, 1 eq.) was added to a vigorously stirred mixture of acid **6** (280 mg, 1.0 mmol), triethylamine (203 mg, 2.0 mmol, 2 eq.) and COMU™ (471 mg, 1.1 mmol, 1.1 eq.) in acetonitrile (15 mL). The mixture was stirred overnight at rt, during which a precipitate was formed. The solid was filtered off, washed with acetonitrile and water, dried and recrystallized from acetonitrile to afford **8e** as a beige solid. *R*<sub>f</sub> = 0.37 (MeOH : CH<sub>2</sub>Cl<sub>2</sub> = 5:95), mp 200-202 °C (dec.), yield 297 mg (82 %). C<sub>22</sub>H<sub>20</sub>N<sub>2</sub>OS (360.5 g/mol). Purity (HPLC): 97 %, *t*<sub>R</sub> = 22.70 min. HRMS (APCI): *m/z* = calcd. for C<sub>22</sub>H<sub>21</sub>N<sub>3</sub>OS [MH<sup>+</sup>] 361.1369, found 361.1383. <sup>1</sup>H NMR (CDCl<sub>3</sub>): δ (ppm) = 2.11-2.27 (m, 2H, 6-CH<sub>2</sub>), 2.39 (s, 3H, CH<sub>3</sub>tolyl), 2.81 (t, *J* = 6.6 Hz, 2H, 7-CH<sub>2</sub>), 2.89-3.00

(m, 2H, 5-CH<sub>2</sub>), 6.83-6.91 (m, 1H, 5-CH<sub>thiazol</sub>), 7.19-7.30 (m, 3H, 3-CH<sub>tolyl</sub>, 5-CH<sub>tolyl</sub>, 4-CH), 7.29-7.37 (m, 1H, 4-CH<sub>thiazol</sub>), 7.37 (s, 1H, 9-CH), 7.42 (d, *J* = 7.8, 2H, 2-CH<sub>tolyl</sub>, 6-CH<sub>tolyl</sub>), 7.47 (dd, *J* = 7.8/2.0 Hz, 1H, 3-CH), 7.55 (broad, 1H, 1-CH), 12.06 (s, 1H, NH). <sup>13</sup>C NMR (CDCl<sub>3</sub>): δ (ppm) = 21.6 (CH<sub>3tolyl</sub>), 28.2 (C-6), 30.9 (C-5), 35.3 (C-7), 113.9 (C-5<sub>thiazol</sub>), 127.1 (C-2<sub>tolyl</sub>, C-6<sub>tolyl</sub>), 127.7 (C-3), 130.0 (C-3<sub>tolyl</sub>, C-5<sub>tolyl</sub>), 130.5 (C-4), 131.6 (C-1), 134.6 (C-9), 137.3 (C-9a), 137.3 (C-8), 137.7 (C-1<sub>tolyl</sub>), 137.8 (C-4<sub>tolyl</sub>), 137.8 (C-4a), 139.6 (C-2), 141.9 (C-4<sub>thiazol</sub>), 160.5 (C-2<sub>thiazol</sub>), 168.5 (O=C-NH). FT-IR (neat):  $\tilde{\nu}$  (cm<sup>-1</sup>) = 3205 (N-H), 2773 (C-H<sub>alkyl</sub>), 1647 (C=O).

**2-[(4-Methyl)phenyl]-N-{4-[(piperidin-1-yl)methyl]phenyl}-6,7-dihydro-5H-benzo[7]annulene-8-carboxamide (8f)**

1-(4-Aminobenzyl)piperidine dihydrochloride (95 mg, 0.36 mmol, 1 eq.) was added to a vigorously stirred mixture of acid **6** (100 mg, 0.36 mmol), triethylamine (110 mg, 1.08 mmol, 3 eq.) and HATU™ (153 mg, 0.39 mmol, 1.1 eq.) in acetonitrile (5 mL). The mixture was stirred overnight at rt. The mixture was concentrated *in vacuo* and the residue was purified by fc (EtOAc : cyclohexane = 8:2 → EtOAc : CH<sub>2</sub>Cl<sub>2</sub> = 1:2 + 5% MeOH) and recrystallization from acetonitrile afforded **8f** as a colorless solid. *R*<sub>f</sub> = 0.14 (CH<sub>2</sub>Cl<sub>2</sub> : MeOH = 95:5), mp 194-196 °C, yield 140 mg (86 %). C<sub>31</sub>H<sub>34</sub>N<sub>2</sub>O (450.6 g/mol). Purity (HPLC): >95 %, *t*<sub>R</sub> = 21.44 min. HRMS (APCI): *m/z* = calcd. for C<sub>31</sub>H<sub>35</sub>N<sub>2</sub>O [MH<sup>+</sup>] 451.2744, found 451.2741. <sup>1</sup>H NMR (CDCl<sub>3</sub>): δ (ppm) = 1.34-1.48 (m, 2H, 4-CH<sub>2piperidin</sub>), 1.57 (m, Hz, 4H, 3-CH<sub>2piperidin</sub>, 5-CH<sub>2piperidin</sub>), 2.10-2.25 (m, 2H, 6-CH<sub>2</sub>), 2.30-2.43 (m, 7H, 2-CH<sub>2piperidin</sub>, 6-CH<sub>2piperidin</sub>, CH<sub>3tolyl</sub>), 2.72 (t, *J* = 6.5 Hz, 2H, 2H, 7-CH<sub>2</sub>), 2.83-2.97 (m, 1H, 5-CH<sub>2</sub>), 3.46 (s, 2H, Ph-CH<sub>2</sub>-N), 7.20-7.25 (m, 3H, 4-CH, 3-CH<sub>tolyl</sub>, 5-CH<sub>tolyl</sub>), 7.31 (d, *J* = 8.5 Hz, 2H, 3-CH<sub>phenyl</sub>, 5-CH<sub>phenyl</sub>), 7.41 (s, 1H, 9-CH), 7.44 (dd, *J* = 7.9/1.9 Hz, 1H, 3-CH), 7.48 (d, *J* = 8.1 Hz, 2H, 2-CH<sub>tolyl</sub>, 6-CH<sub>tolyl</sub>), 7.51 (d, *J* = 1.8 Hz, 1H, 1-CH), 7.55 (d, *J* = 8.5 Hz, 2H, 2-CH<sub>phenyl</sub>, 6-CH<sub>phenyl</sub>), 7.62 (s, 1H, NH). <sup>13</sup>C NMR (CDCl<sub>3</sub>): δ (ppm) = 21.6 (C-4<sub>piper</sub>), 24.8 (C-6), 26.4 (C-3<sub>piper.</sub>, C-5<sub>piper.</sub>), 30.9 (C-7), 32.0 (C-5), 54.8 (C-2<sub>piper.</sub>, C-6<sub>piper.</sub>), 63.8 (Ph-CH<sub>2</sub>-N), 120.3 (C-2<sub>phenyl</sub>, C-6<sub>phenyl</sub>), 127.2 (C-2<sub>tolyl</sub>, C-6<sub>tolyl</sub>), 127.3 (C-3), 130.0 (C-3<sub>phenyl</sub>, C-5<sub>phenyl</sub>), 130.3 (C-9), 130.4 (C-3<sub>tolyl</sub>, C-5<sub>tolyl</sub>), 131.1 (C-1), 134.7 (C-4), 135.1 (C-4<sub>phenyl</sub>), 137.3 (C-1<sub>tolyl</sub>), 137.6 (C-4<sub>tolyl</sub>), 137.9 (C-9a), 138.4 (C-4a), 139.6 (C-2), 141.7 (C-4a), 146.3 (C-1<sub>phenyl</sub>), 168.4 (O=C-NH). FT-IR (neat):  $\tilde{\nu}$  (cm<sup>-1</sup>) = 3325 (N-H), 2931 (C-H<sub>alkyl</sub>), 1643 (C=O), 1041, 1018 (C-O).

***N*-{4-[*N*-Methyl-*N*-(tetrahydro-2*H*-pyran-4-yl)aminomethyl]phenyl}-6,7-dihydro-5*H*-benzo[7]annulene-8-carboxamide (**9a**)**

According to general procedure A amide **7** (83 mg, 0.17 mmol), PdCl<sub>2</sub>(dppf) (16 mg, 0.02 mmol, 10 mol %), NaOCH<sub>3</sub> (20 mg, 0.35 mmol, 2 eq.) and phenylboronic acid (24 mg, 0.2 mmol, 1.1 eq.) were suspended in dry dimethoxyethane (5 mL). The crude product was purified by fc (EtOAc : MeOH = 95:5) and recrystallized from acetonitrile to give **9a** as a colorless solid. *R*<sub>f</sub> = 0.17 (CH<sub>2</sub>Cl<sub>2</sub> : MeOH = 95:5), mp 165-167 °C, yield 74 mg (90 %). C<sub>31</sub>H<sub>34</sub>N<sub>2</sub>O<sub>2</sub> (466.6 g/mol). Purity (HPLC): 95 %, *t*<sub>R</sub> = 20.83 min. HRMS (APCI): *m/z* = calcd. for C<sub>31</sub>H<sub>35</sub>N<sub>2</sub>O<sub>2</sub> [MH<sup>+</sup>] 467.2693, found 467.2690. <sup>1</sup>H NMR (CDCl<sub>3</sub>): δ (ppm) = 1.55-1.84 (m, 4H, 3-CH<sub>2</sub>pyran, 5-CH<sub>2</sub>pyran), 2.11-2.22 (m, 2H, 6-CH<sub>2</sub>), 2.23 (s, 3H, N-CH<sub>3</sub>), 2.58-2.69 (m, 1H, 4-H<sub>pyran</sub>), 2.72 (t, *J* = 6.6 Hz, 2H, 7-CH<sub>2</sub>), 2.84-2.96 (m, 2H, 5-CH<sub>2</sub>), 3.37 (td, *J* = 11.7/2.3 Hz, 2H, CH<sub>2axial</sub>-O-CH<sub>2axial</sub>), 3.60 (s, 2H, Ph-CH<sub>2</sub>-N), 4.04 (dd, *J* = 11.4/2.5 Hz, 2H, CH<sub>2equat</sub>-O-CH<sub>2equat</sub>), 7.25 (d, *J* = 7.7 Hz, 1H, 4-CH), 7.30-7.38 (m, 4H, 3-CH<sub>N-phenyl</sub>, 5-CH<sub>N-phenyl</sub>, 3-CH, 9-CH), 7.37-7.47 (m, 3H, 4-CH<sub>N-phenyl</sub>, 3-CH<sub>phenyl</sub>, 5-CH<sub>phenyl</sub>), 7.46 (d, *J* = 2.1 Hz, 1H, 1-CH), 7.54 (m, 2H, 2-CH<sub>N-phenyl</sub>, 6-CH<sub>N-phenyl</sub>), 7.57-7.60 (m, 2H, 2-CH<sub>phenyl</sub>, 6-CH<sub>phenyl</sub>), 7.65 (s, 1H, N-H). <sup>13</sup>C NMR (CDCl<sub>3</sub>): δ (ppm) = 28.4 (C-6), 29.4 (C-7), 30.9 (C-3<sub>pyran</sub>, C-5<sub>pyran</sub>), 35.1 (C-5), 37.7 (N-CH<sub>3</sub>), 57.7 (Ph-CH<sub>2</sub>-N), 60.0 (C-4<sub>pyran</sub>), 68.0 (C-2<sub>pyran</sub>, C-6<sub>pyran</sub>), 120.5 (C-2<sub>N-phenyl</sub>, C-6<sub>N-phenyl</sub>), 127.4 (C-2<sub>phenyl</sub>, C-6<sub>phenyl</sub>), 127.6 (C-3), 127.8 (C-3<sub>phenyl</sub>, C-5<sub>phenyl</sub>), 129.3 (C-3<sub>N-phenyl</sub>, C-5<sub>N-phenyl</sub>), 130.2 (C-4<sub>phenyl</sub>), 130.4 (C-4), 131.3 (C-1), 134.8 (C-9), 135.1 (C-4a), 138.4 (C-2), 139.7 (C-1<sub>N-phenyl</sub>), 140.9 (C-9a), 142.0 (C-8), 146.4 (C-1<sub>phenyl</sub>), 168.5 (O=C-NH). A Signal for the quaternary carbon atom C-4<sub>N-phenyl</sub> is not visible. FT-IR (neat):  $\tilde{\nu}$  (cm<sup>-1</sup>) = 3302 (N-H), 2939, 2843 (C-H<sub>alkyl</sub>), 1643 (C=O), 1049, 1010 (C-O).

***2*-(3-Methyphenyl)-*N*-{[*N*-methyl-*N*-(tetrahydro-2*H*-pyran-4-yl)aminomethyl]phenyl}-6,7-dihydro-5*H*-benzo[7]annulene-8-carboxamide (**9b**)**

According to general procedure A amide **7** (100 mg, 0.21 mmol), PdCl<sub>2</sub>(dppf) (10 mg, 0.01 mmol, 5 mol%), K<sub>2</sub>CO<sub>3</sub> (60 mg, 0.42 mmol, 2 eq.) and 3-methylphenylboronic acid (45 mg, 0.32 mmol, 1.5 eq.) were suspended in dry dimethoxyethane (8 mL). The crude product was purified by fc (EtOAc : MeOH = 95:5) and recrystallized from acetonitrile to give **9b** as a colorless solid. *R*<sub>f</sub> = 0.24 (CH<sub>2</sub>Cl<sub>2</sub> : MeOH = 95:5), mp 183-184 °C, yield 92 mg (92 %). C<sub>32</sub>H<sub>36</sub>N<sub>2</sub>O<sub>2</sub> (480.6 g/mol). Purity (HPLC): 95 %, *t*<sub>R</sub> = 20.89 min. HRMS (APCI): *m/z* = calcd. for C<sub>32</sub>H<sub>37</sub>N<sub>2</sub>O<sub>2</sub> [MH<sup>+</sup>] 481.2850, found 481.2827. <sup>1</sup>H NMR (CDCl<sub>3</sub>): δ (ppm) = 1.63-1.88 (m, 4H, 3-CH<sub>2</sub>pyran, 5-CH<sub>2</sub>pyran), 2.13-2.21 (m, 2H, 6-CH<sub>2</sub>), 2.21 (s,

3H, N-CH<sub>3</sub>), 2.33 (s, 3H, CH<sub>3</sub>tolyl), 2.57-2.70 (m, 1H, 4-H<sub>pyran</sub>), 2.73 (t, *J* = 6.6 Hz, 2H, 7-CH<sub>2</sub>), 2.89 (t, *J* = 5.5 Hz, 2H, 5-CH<sub>2</sub>), 3.30 (td, *J* = 11.7/2.3 Hz, 2H, CH<sub>2</sub>axial-O-CH<sub>2</sub>axial), 3.57 (s, 2H, Ph-CH<sub>2</sub>-N), 4.04 (dd, *J* = 11.9/3.6 Hz, 2H, CH<sub>2</sub>equat.-O-CH<sub>2</sub>equat.), 7.17 (d, *J* = 7.3 Hz, 1H, 4-CH), 7.24 (d, *J* = 7.9 Hz, 1H, 6-CH<sub>tolyl</sub>), 7.28-7.36 (m, 3H, 3-CH<sub>phenyl</sub>, 5-CH<sub>phenyl</sub>, 5-CH<sub>tolyl</sub>), 7.35-7.44 (m, 3H, 2-CH<sub>tolyl</sub>, 4-CH<sub>tolyl</sub>, 9-CH), 7.45 (dd, *J* = 7.9/2.0 Hz, 1H, 3-CH), 7.53 (d, *J* = 1.9 Hz, 1H, 1-CH), 7.56 (d, *J* = 8.4 Hz, 2H, 2-H<sub>phenyl</sub>, 6-H<sub>phenyl</sub>), 7.62 (s, 1H, N-H). <sup>13</sup>C NMR (CDCl<sub>3</sub>): δ (ppm) = 22.2 (CH<sub>3</sub>tolyl), 28.4 (C-6), 29.6 (C-3<sub>pyran</sub>, C-5<sub>pyran</sub>), 30.9 (C-7), 35.1 (C-5), 38.0 (N-CH<sub>3</sub>), 57.7 (Ph-CH<sub>2</sub>-N), 60.0 (C-4<sub>pyran</sub>), 68.2 (C-2<sub>pyran</sub>, C-6<sub>pyran</sub>), 120.5 (C-2<sub>phenyl</sub>, C-6<sub>phenyl</sub>), 124.5 (C-2<sub>tolyl</sub>), 127.5 (C-3), 128.2 (C-4<sub>tolyl</sub>), 128.5 (C-4), 129.2 (C-5<sub>tolyl</sub>), 129.9 (C-3<sub>phenyl</sub>, C-5<sub>phenyl</sub>), 130.3 (C-6<sub>tolyl</sub>), 131.3 (C-1), 134.7 (C-9), 135.1 (C-4a), 136.4 (C-3<sub>tolyl</sub>), 137.2 (C-4<sub>phenyl</sub>), 138.4 (C-2), 138.9 (C-1<sub>tolyl</sub>), 139.8 (C-1<sub>phenyl</sub>), 140.8 (C-9a), 141.9 (C-8), 168.5 (O=C-NH). FT-IR (neat):  $\tilde{\nu}$  (cm<sup>-1</sup>) = 3344 (N-H), 2924, 2866 (C-H<sub>alkyl</sub>), 1647 (C=O), 1095, 1010 (C-O).

**2-(2-Methyphenyl)-N-{4-[N-Methyl-N-(tetrahydro-2H-pyran-4-yl)aminomethyl]phenyl}-6,7-dihydro-5H-benzo[7]annulene-8-carboxamide (9c)**

According to general procedure A amide **7** (100 mg, 0.21 mmol), PdCl<sub>2</sub>(dppf) (10 mg, 0.01 mmol, 5 mol%), K<sub>2</sub>CO<sub>3</sub> (60 mg, 0.42 mmol, 2 eq.) and 2-methylphenylboronic acid (45 mg, 0.32 mmol, 1.5 eq.) were suspended in dry dimethoxyethane (5 mL). The crude product was purified by fc (EtOAc : MeOH+3 % triethylamine = 95:5) and recrystallized from acetonitrile to give **9c** as a colorless solid. R<sub>f</sub> = 0.24 (CH<sub>2</sub>Cl<sub>2</sub> : MeOH = 95:5), mp 144-145 °C, yield 69 mg (68 %). C<sub>32</sub>H<sub>36</sub>N<sub>2</sub>O<sub>2</sub> (480.6 g/mol). Purity (HPLC): 99 %, t<sub>R</sub> = 21.34 min. HRMS (APCI): m/z = calcd. for C<sub>32</sub>H<sub>37</sub>N<sub>2</sub>O<sub>2</sub> [MH<sup>+</sup>] 481.2850, found 481.2869. <sup>1</sup>H NMR (CDCl<sub>3</sub>): δ (ppm) = 1.63-1.88 (m, 4H, 3-CH<sub>2</sub>pyran, 5-CH<sub>2</sub>pyran), 2.13-2.21 (m, 2H, 6-CH<sub>2</sub>), 2.21 (s, 3H, N-CH<sub>3</sub>), 2.28 (s, 3H, CH<sub>3</sub>tolyl), 2.65 (tt, *J* = 11.2/3.9 Hz, 1H, 4-H<sub>pyran</sub>), 2.73 (t, *J* = 6.3 Hz, 2H, 7-CH<sub>2</sub>), 2.89 (t, *J* = 5.7 Hz, 2H, 5-CH<sub>2</sub>), 3.36 (td, *J* = 11.6/2.3 Hz, 2H, CH<sub>2</sub>axial-O-CH<sub>2</sub>axial), 3.57 (s, 2H, Ph-CH<sub>2</sub>-N), 4.04 (dd, *J* = 10.7/4.1 Hz, 2H, CH<sub>2</sub>equat.-O-CH<sub>2</sub>equat.), 7.18 (dd, *J* = 7.7/1.7 Hz, 1H, 3-CH), 7.20 (d, *J* = 7.0 Hz, 1H, 4-CH), 7.22 (d, *J* = 1.9 Hz, 1H, 1-CH), 7.23-7.30 (m, 4H, 2-, 3-, 4-, 5-CH<sub>tolyl</sub>), 7.30 (d, 2H, *J* = 8.5 Hz, 3-CH<sub>phenyl</sub>, 5-CH<sub>phenyl</sub>), 7.35 (s, 9-CH), 7.55 (d, *J* = 8.5 Hz, 2H, 2-H<sub>phenyl</sub>, 6-H<sub>phenyl</sub>), 7.67 (s, 1H, N-H). <sup>13</sup>C NMR (CDCl<sub>3</sub>): δ (ppm) = 21.0 (CH<sub>3</sub>tolyl), 28.3 (C-6), 29.6 (C-3<sub>pyran</sub>, C-5<sub>pyran</sub>), 31.0 (C-7), 35.2 (C-5), 38.0 (N-CH<sub>3</sub>), 57.7 (Ph-CH<sub>2</sub>-N), 60.0 (C-4<sub>pyran</sub>), 68.2 (C-2<sub>pyran</sub>, C-6<sub>pyran</sub>), 120.4 (C-2<sub>phenyl</sub>, C-6<sub>phenyl</sub>), 126.3 (C-3), 127.8 (C-4), 129.4 (C-5<sub>tolyl</sub>), 129.7 (C-6<sub>tolyl</sub>), 129.7 (C-4<sub>tolyl</sub>), 129.9 (C-3<sub>phenyl</sub>, C-5<sub>phenyl</sub>), 130.2 (C-3<sub>tolyl</sub>), 130.1 (C-1), 133.4 (C-9),

134.6 (C-2<sub>tolyl</sub>), 135.8 (C-4a), 137.2 (C-4<sub>phenyl</sub>), 137.8 (C-2), 139.1 (C-1<sub>phenyl</sub>), 140.5 (C-9a), 141.5 (C-8), 142.3 (C-1<sub>tolyl</sub>). A signal for the carbon atom O=C-NH is not visible. FT-IR (neat):  $\tilde{\nu}$  (cm<sup>-1</sup>) = 3302 (N-H), 2966, 2862 (C-H<sub>alkyl</sub>), 1651 (C=O), 1095, 1014 (C-O).

**2-(4-Ethylphenyl)-N-{4-[N-methyl-N-(tetrahydro-2H-pyran-4-yl)aminomethyl]phenyl}-6,7-dihydro-5H-benzo[7]annulene-8-carboxamide (9d)**

According to general procedure A amide **7** 100 mg, 0.21 mmol), PdCl<sub>2</sub>(dppf) (8 mg, 0.01 mmol, 5 mol%), KOAc (42 mg, 0.42 mmol, 2 eq.) and 4-ethylphenylboronic acid (50 mg, 0.32 mmol, 1.5 eq.) were suspended in dry dimethoxyethane (8 mL). The crude product was purified by fc (EtOAc : MeOH = 95:5) and recrystallized from acetonitrile to give **9d** as a colorless solid. R<sub>f</sub> = 0.20 (CH<sub>2</sub>Cl<sub>2</sub> : MeOH = 95:5), mp 154-156 °C, yield 100 mg (96 %). C<sub>33</sub>H<sub>38</sub>N<sub>2</sub>O<sub>2</sub> (494.6 g/mol). Purity (HPLC): 98 %, t<sub>R</sub> = 21.61 min. HRMS (APCI): m/z = calcd. for C<sub>33</sub>H<sub>39</sub>N<sub>2</sub>O<sub>2</sub> [MH<sup>+</sup>] 495.3006, found 495.3004. <sup>1</sup>H NMR (CDCl<sub>3</sub>):  $\delta$  (ppm) = 1.28 (t, *J* = 7.6 Hz, 3H, CH<sub>2</sub>CH<sub>3</sub>), 1.62-1.83 (m, 4H, 3-CH<sub>2</sub>pyran, 5-CH<sub>2</sub>pyran), 2.10-2.19 (m, 2H, 6-CH<sub>2</sub>), 2.21 (s, 3H, N-CH<sub>3</sub>), 2.54-2.70 (m, 1H, 4-CH<sub>pyran</sub>), 2.68-2.76 (m, 4H, 7-CH<sub>2</sub>, CH<sub>2</sub>CH<sub>3</sub>), 2.82-2.95 (m, 2H, 5-CH<sub>2</sub>), 3.37 (td, *J* = 11.6/2.4 Hz, 2H, CH<sub>2</sub>axial-O-CH<sub>2</sub>axial), 3.57 (s, 2H, Ph-CH<sub>2</sub>-N), 4.04 (dd, *J* = 10.9/3.4 Hz, 2H, CH<sub>2</sub>equat-O-CH<sub>2</sub>equat), 7.23 (d, *J* = 7.9 Hz, 1H, 4-CH), 7.28 (d, *J* = 8.5 Hz, 2H, 3-CH<sub>ethylphenyl</sub>, 5-CH<sub>ethylphenyl</sub>), 7.32 (d, *J* = 8.3 Hz, 2H, 3-CH<sub>phenyl</sub>, 5-CH<sub>phenyl</sub>), 7.42 (s, 1H, 9-CH), 7.44 (dd, *J* = 7.8/1.9 Hz, 1H, 3-CH), 7.51 (m, 3H, 1-CH, 2-CH<sub>ethylphenyl</sub>, 6-CH<sub>ethylphenyl</sub>), 7.56 (d, *J* = 8.5 Hz, 2H, 2-H<sub>phenyl</sub>, 6-H<sub>phenyl</sub>), 7.61 (s, 1H, N-H). <sup>13</sup>C NMR (CDCl<sub>3</sub>):  $\delta$  (ppm) = 16.04 (CH<sub>2</sub>CH<sub>3</sub>), 28.4 (C-6), 28.9 (CH<sub>2</sub>CH<sub>3</sub>), 29.6 (C-3<sub>pyran</sub>, C-5<sub>pyran</sub>), 30.9 (C-7), 35.1 (C-5), 38.0 (N-CH<sub>3</sub>), 57.8 (Ph-CH<sub>2</sub>), 60.0 (C-4<sub>pyran</sub>), 68.2 (C-2<sub>pyran</sub>, C-6<sub>pyran</sub>), 120.5 (C-2<sub>phenyl</sub>, C-6<sub>phenyl</sub>), 127.3 (C-2<sub>ethylphenyl</sub>, C-6<sub>ethylphenyl</sub>), 127.3 (C-3), 128.8 (C-3<sub>ethylphenyl</sub>, C-5<sub>ethylphenyl</sub>), 129.9 (C-3<sub>phenyl</sub>, C-5<sub>phenyl</sub>), 130.3 (C-4), 131.2 (C-1), 134.8 (C-9), 135.1 (C-4a), 137.3 (C-4<sub>phenyl</sub>), 138.2 (C-4<sub>ethylphenyl</sub>), 138.4 (C-1<sub>phenyl</sub>), 139.7 (C-2), 139.7 (C-9a), 141.7 (C-8), 143.9 (C-1<sub>ethylphenyl</sub>), 168.5 (O=C-NH). FT-IR (neat):  $\tilde{\nu}$  (cm<sup>-1</sup>) = 3332 (N-H), 2951, 2835 (C-H<sub>alkyl</sub>), 1643 (C=O), 1087 (C-O).

**2-(4-Butylphenyl)-N-{4-[N-methyl-N-(tetrahydro-2H-pyran-4-yl)aminomethyl]phenyl}-6,7-dihydro-5H-benzo[7]annulene-8-carboxamide (9e)**

According to general procedure A amide **7** (100 mg, 0.21 mmol), PdCl<sub>2</sub>(dppf) (10 mg, 0.01 mmol, 5 mol%), NaOCH<sub>3</sub> (23 mg, 0.42 mmol, 2 eq.) and 4-butylphenylboronic acid (41 mg, 0.23 mmol, 1.1 eq.) were suspended in dry dimethoxyethane (6 mL). The crude



product was purified by fc (EtOAc : MeOH = 95:5) and recrystallized from acetonitrile to give **9e** as a colorless solid.  $R_f$  = 0.32 (CH<sub>2</sub>Cl<sub>2</sub> : MeOH= 95:5), mp 134-135 °C, yield 83 mg (76 %). C<sub>35</sub>H<sub>42</sub>N<sub>2</sub>O<sub>2</sub> (522.7 g/mol). Purity (HPLC): 99 %,  $t_R$  = 22.95 min. HRMS (APCI):  $m/z$  = calcd. for C<sub>35</sub>H<sub>43</sub>N<sub>2</sub>O<sub>2</sub> [MH<sup>+</sup>] 523.3319, found 523.3335. <sup>1</sup>H NMR (CDCl<sub>3</sub>):  $\delta$  (ppm) = 0.95 (t,  $J$  = 7.3 Hz, 3H, 4-CH<sub>3</sub>butyl), 1.39 (h, 2H, 3-CH<sub>2</sub>butyl), 1.55-1.81 (m, 6H, 3-CH<sub>2</sub>pyran, 5-CH<sub>2</sub>pyran, 2-CH<sub>2</sub>butyl), 2.07-2.19 (m, 2H, 6-CH<sub>2</sub>), 2.21 (s, 3H, N-CH<sub>3</sub>), 2.58-2.70 (m, 3H, 4-CH<sub>2</sub>pyran, 1-CH<sub>2</sub>butyl), 2.71 (t,  $J$  = 6.5 Hz, 2H, 7-CH<sub>2</sub>), 2.82-2.92 (m, 2H, 5-CH<sub>2</sub>), 3.37 (td,  $J$  = 11.3/2.3 Hz, 2H, CH<sub>2</sub>axial-O-CH<sub>2</sub>axial), 3.57 (s, 2H, Ph-CH<sub>2</sub>-N), 4.04 (dd,  $J$  = 11.3/4.0 Hz, 2H, CH<sub>2</sub>equat-O-CH<sub>2</sub>equat.), 7.19-7.27 (m, 3H, 4-CH, 3-CH<sub>2</sub>butylphenyl, 5-CH<sub>2</sub>butylphenyl), 7.31 (d,  $J$  = 8.3 Hz, 2H, 3-CH<sub>2</sub>phenyl, 5-CH<sub>2</sub>phenyl), 7.41 (s, 1H, 9-CH), 7.44 (dd,  $J$  = 7.8/2.0 Hz, 1H, 3-CH), 7.46-7.53 (m, 3H, 1-CH, 2-CH<sub>2</sub>butylphenyl, 6-CH<sub>2</sub>butylphenyl), 7.56 (d,  $J$  = 8.4 Hz, 2H, 2-CH<sub>2</sub>phenyl, 6-CH<sub>2</sub>phenyl), 7.67 (s, 1H, N-H). <sup>13</sup>C NMR (CDCl<sub>3</sub>):  $\delta$  (ppm) = 14.4 (C-4butyl), 22.9 (C-3butyl), 28.4 (C-6), 29.6 (C-3pyran, C-5pyran), 30.9 (C-7), 34.1 (C-2butyl), 35.1 (C-5), 35.7 (C-1butyl), 38.0 (N-CH<sub>3</sub>), 57.8 (Ph-CH<sub>2</sub>-N), 60.0 (C-4pyran), 68.2 (C-2pyran, C-6pyran), 120.5 (C-2phenyl, C-6phenyl), 127.2 (C-2butylphenyl, C-6butylphenyl), 127.3 (C-3butylphenyl, C-5butylphenyl), 129.4 (C-3), 129.9 (C-3phenyl, C-5phenyl), 130.3 (C-4), 131.2 (C-1), 134.8 (C-9), 135.1 (C-4a), 136.3 (C-1butylphenyl), 137.3 (C-4phenyl), 138.1 (C-1phenyl), 138.3 (C-2), 139.6 (C-9a), 141.7 (C-8), 142.6 (C-4butylphenyl), 168.5 (O=C-NH). FT-IR (neat):  $\tilde{\nu}$  (cm<sup>-1</sup>) = 3352 (N-H), 2951, 2927 (C-H<sub>alkyl</sub>), 1643 (C=O), 1087 (C-O).

**2-(4-*tert*-Butylphenyl)-*N*-{4-[*N*-methyl-*N*-(tetrahydro-2*H*-pyran-4-yl)aminomethyl]phenyl}-6,7-dihydro-5*H*-benzo[7]annulene-8-carboxamide (**9f**)**

According to general procedure A amide **7** (100 mg, 0.21 mmol), PdCl<sub>2</sub>(dppf) (8 mg, 0.01 mmol, 5 mol%), KOAc (42 mg, 0.42 mmol, 2 eq.) and 4-*tert*-butylphenylboronic acid (45 mg, 0.25 mmol, 1.2 eq.) were suspended in dry dimethoxyethane (8 mL). The crude product was purified by fc (EtOAc : MeOH = 95:5) and recrystallized from acetonitrile to give **9f** as a colorless solid. ( $R_f$  = 0.22, CH<sub>2</sub>Cl<sub>2</sub> : MeOH= 95:5), mp 164-165 °C, yield 88 mg (79 %). C<sub>35</sub>H<sub>42</sub>N<sub>2</sub>O<sub>2</sub> (522.7 g/mol). Purity (HPLC): 99 %,  $t_R$  = 22.9 min. HRMS (APCI):  $m/z$  = calcd. for C<sub>35</sub>H<sub>43</sub>N<sub>2</sub>O<sub>2</sub> [MH<sup>+</sup>] 523.3319, found 523.3335. <sup>1</sup>H NMR (CDCl<sub>3</sub>):  $\delta$  (ppm) = 1.36 (s, 9H, 2-CH<sub>3</sub>butyl, 3-CH<sub>3</sub>butyl, 4-CH<sub>3</sub>butyl), 1.62-1.84 (m, 4H, 3-CH<sub>2</sub>pyran, 5-CH<sub>2</sub>pyran), 2.17 (t,  $J$  = 5.9 Hz, 2H, 6-CH<sub>2</sub>), 2.21 (s, 3H, N-CH<sub>3</sub>), 2.51-2.69 (m, 1H, 4-CH<sub>2</sub>pyran), 2.72 (t,  $J$  = 6.6 Hz, 2H, 7-CH<sub>2</sub>), 2.84-2.94 (m, 2H, 5-CH<sub>2</sub>), 3.37 (td,  $J$  = 11.5/2.3 Hz, 2H, CH<sub>2</sub>axial-O-CH<sub>2</sub>axial), 3.57 (s, 2H, Ph-CH<sub>2</sub>-N), 4.04 (dd,  $J$  = 10.9/4.1 Hz, 2H, CH<sub>2</sub>equat-O-CH<sub>2</sub>equat), 7.23 (d,  $J$  = 7.8, 1H, 4-CH), 7.31 (d,  $J$  = 8.4 Hz, 2H, 3-CH<sub>2</sub>phenyl, 5-

$\text{CH}_{\text{phenyl}}$ ), 7.41-7.44 (m, 2H, 9-CH, 3-CH), 7.47 (d,  $J = 8.4$  Hz, 2H, 3- $\text{CH}_{\text{butylphenyl}}$ , 5- $\text{CH}_{\text{butylphenyl}}$ ), 7.51-7.54 (m, 3H, 1-CH, 2- $\text{CH}_{\text{butylphenyl}}$ , 6- $\text{CH}_{\text{butylphenyl}}$ ), 7.56 (d,  $J = 8.5$  Hz, 2H, 2- $\text{H}_{\text{phenyl}}$ , 6- $\text{H}_{\text{phenyl}}$ ), 7.62 (s, 1H, N-H).  $^{13}\text{C}$  NMR ( $\text{CDCl}_3$ ):  $\delta$  (ppm) = 28.4 (C-6), 29.6 (C-3<sub>pyran</sub>, C-5<sub>pyran</sub>), 30.9 (C-7), 31.8 (C-2<sub>butyl</sub>, C-3<sub>butyl</sub>, C-4<sub>butyl</sub>), 35.1 (C-5), 38.0 (N-CH<sub>3</sub>), 57.8 (Ph-CH<sub>2</sub>-N), 60.0 (C-4<sub>pyran</sub>), 68.2 (C-2<sub>pyran</sub>, C-6<sub>pyran</sub>), 85.5 (C-1<sub>butyl</sub>), 120.5 (C-2<sub>phenyl</sub>, C-6<sub>phenyl</sub>), 126.2 (C-2<sub>butylphenyl</sub>, C-6<sub>butylphenyl</sub>), 127.0 (C-3<sub>butylphenyl</sub>, C-5<sub>butylphenyl</sub>), 127.4 (C-3), 129.9 (C-3<sub>phenyl</sub>, C-5<sub>phenyl</sub>), 130.3 (C-4), 131.2 (C-1), 134.8 (C-9), 135.1 (C-4a), 136.3 (C-1<sub>butylphenyl</sub>), 137.3 (C-4<sub>phenyl</sub>), 137.9 (C-1<sub>phenyl</sub>), 138.3 (C-2), 139.5 (C-9a), 141.7 (C-8), 150.8 (C-4<sub>butylphenyl</sub>), 168.5 (O=C-NH). FT-IR (neat):  $\tilde{\nu}$  ( $\text{cm}^{-1}$ ) = 3352 (N-H), 2966, 2904 (C-H<sub>alkyl</sub>), 1651 (C=O), 1064, 1022 (C-O).

**2-([1,1'-Biphenyl]-4-yl)-N-{4-[N-methyl-N-(tetrahydro-2H-pyran-4yl)-aminomethyl]phenyl}-6,7-dihydro-5H-benzo[7]annulene-8-carboxamide (9g)**

According to general procedure A amide **7** (200 mg, 0.42 mmol),  $\text{PdCl}_2(\text{dppf})$  (16 mg, 0.02 mmol, 5 mol%), KOAc (84 mg, 0.84 mmol, 2 eq.) and 1,1'-biphenylboronic acid (130 mg, 0.64 mmol, 1.5 eq.) were suspended in dry dimethoxyethane (10 mL). The crude product was purified by fc (EtOAc : MeOH = 95:5) and recrystallized from acetonitrile to give **9g** as a colorless solid.  $R_f = 0.15$  ( $\text{CH}_2\text{Cl}_2$  : MeOH = 95:5), mp 203 °C, yield 205 mg (90 %).  $\text{C}_{37}\text{H}_{38}\text{N}_2\text{O}_2$  (542.7 g/mol). Purity (HPLC): >99 %,  $t_R = 25.01$  min. HRMS (APCI):  $m/z = \text{calcd. for } \text{C}_{37}\text{H}_{39}\text{N}_2\text{O}_2 [\text{MH}^+] 543.3006$ , found 543.3017.  $^1\text{H}$  NMR ( $\text{CDCl}_3$ ):  $\delta$  (ppm) = 1.62-1.82 (m, 4H, 3- $\text{CH}_2$ <sub>pyran</sub>, 5- $\text{CH}_2$ <sub>pyran</sub>), 2.13-2.18 (m, 2H, 6- $\text{CH}_2$ ), 2.21 (s, 3H, N-CH<sub>3</sub>), 2.56-2.69 (s, 1H, 4- $\text{CH}_{\text{pyran}}$ ), 2.74 (t,  $J = 6.6$  Hz, 2H, 7- $\text{CH}_2$ ), 2.85-3.08 (m, 2H, 5- $\text{CH}_2$ ), 3.37 (td,  $J = 11.6/2.4$  Hz, 2H,  $\text{CH}_{2\text{axial}}\text{-O-CH}_{2\text{axial}}$ ), 3.57 (s, 2H, Ph-CH<sub>2</sub>-N), 4.04 (dd,  $J = 10.6/4.1$  Hz, 2H,  $\text{CH}_{2\text{equat}}\text{-O-CH}_{2\text{equat}}$ ), 7.27 (d,  $J = 8.1$  Hz, 1H, 4-CH), 7.31 (d,  $J = 8.4$  Hz, 2H, 3- $\text{CH}_{\text{phenyl}}$ , 5- $\text{CH}_{\text{phenyl}}$ ), 7.34-7.39 (m, 1H, 4'- $\text{CH}_{\text{biphenyl}}$ ), 7.43-7.49 (m, 3H, 9-CH, 3- $\text{CH}_{\text{phenyl}}$ , 5- $\text{CH}_{\text{phenyl}}$ ), 7.51 (dd,  $J = 7.8/2.0$  Hz, 1H, 3-CH), 7.53-7.61 (m, 3H, 1-CH, 2- $\text{CH}_{\text{biphenyl}}$ , 6- $\text{CH}_{\text{biphenyl}}$ ), 7.62-7.65 (m, 3H, 2- $\text{H}_{\text{phenyl}}$ , 6- $\text{H}_{\text{phenyl}}$ , N-H), 7.65-7.69 (m, 4H, 2', 3', 5', 6'- $\text{CH}_{\text{biphenyl}}$ ).  $^{13}\text{C}$  NMR ( $\text{CDCl}_3$ ):  $\delta$  (ppm) = 28.4 (C-6), 29.6 (C-3<sub>pyran</sub>, C-5<sub>pyran</sub>), 30.9 (C-7), 35.1 (C-5), 38.0 (N-CH<sub>3</sub>), 57.8 (Ph-CH<sub>2</sub>-N), 60.0 (C-4<sub>pyran</sub>), 68.2 (C-2<sub>pyran</sub>, C-6<sub>pyran</sub>), 120.5 (C-2<sub>phenyl</sub>, C-6<sub>phenyl</sub>), 127.4 (C-4'<sub>phenyl</sub>), 127.5 (C-3'<sub>biphenyl</sub>, C-5'<sub>biphenyl</sub>), 127.7 (C-3<sub>biphenyl</sub>, C-5<sub>biphenyl</sub>), 127.84 (C-3), 128.0 (C-2'<sub>biphenyl</sub>, C-6'<sub>biphenyl</sub>), 129.3 (C-2<sub>biphenyl</sub>, C-6<sub>biphenyl</sub>), 129.9 (C-3<sub>phenyl</sub>, C-5<sub>phenyl</sub>), 130.5 (C-4), 131.2 (C-1), 134.7 (C-9), 135.2 (C-4a), 137.3 (C-4<sub>phenyl</sub>), 137.9 (C-1<sub>phenyl</sub>), 138.6 (C-2), 139.2 (C-9a), 139.8 (C-4<sub>biphenyl</sub>), 140.6 (C-1'<sub>biphenyl</sub>), 141.1 (C-1<sub>biphenyl</sub>), 142.1 (C-8), 168.3 (O=C-

NH). FT-IR (neat):  $\tilde{\nu}$  (cm<sup>-1</sup>) = 3344 (N-H), 2970, 2940 (C-H<sub>alkyl</sub>), 1647 (C=O), 1138, 1056 (C-O).

***N*-{4-[*N*-Methyl-*N*-(tetrahydro-2*H*-pyran-4-yl)aminomethyl]phenyl}-2-(naphthalen-2-yl)-6,7-dihydro-5*H*-benzo[7]annulene-8-carboxamide (**9h**)**

According to general procedure A amide **7** (100 mg, 0.21 mmol), PdCl<sub>2</sub>(dppf) (8 mg, 0.01 mmol, 5 mol%), KOAc (40 mg, 0.42 mmol, 2 eq.) and 2-naphthylboronic acid (40 mg, 0.23 mmol, 1.1 eq.) were suspended in dry dimethoxyethane (5 mL). The crude product was purified by fc (EtOAc : MeOH = 95:5) and recrystallized from acetonitrile to give **9h** as a colorless solid. *R*<sub>f</sub> = 0.19, CH<sub>2</sub>Cl<sub>2</sub> : MeOH = 95:5, mp 172-174 °C, yield 84 mg (77 %). C<sub>35</sub>H<sub>36</sub>N<sub>2</sub>O<sub>2</sub> (516.6 g/mol). Purity (HPLC): 96 %, *t*<sub>R</sub> = 21.57 min. HRMS (APCI): *m/z* = calcd. for C<sub>35</sub>H<sub>37</sub>N<sub>2</sub>O<sub>2</sub> [MH<sup>+</sup>] 517.2850, found 517.2880. <sup>1</sup>H NMR (CDCl<sub>3</sub>):  $\delta$  (ppm) = 1.63-1.88 (m, 4H, 3-CH<sub>2</sub><sub>pyran</sub>, 5-CH<sub>2</sub><sub>pyran</sub>), 2.15-2.20 (m, 2H, 6-CH<sub>2</sub>), 2.21 (s, 3H, N-CH<sub>3</sub>), 2.64 (tt, *J* = 11.1/4.1 Hz, 1H, 4-CH<sub>pyran</sub>), 2.75 (t, *J* = 6.6 Hz, 2H, 7-CH<sub>2</sub>), 2.87-2.97 (m, 2H, 5-CH<sub>2</sub>), 3.37 (td, *J* = 11.6/2.4 Hz, 2H, CH<sub>2axial</sub>-O-CH<sub>2axial</sub>), 3.57 (s, 2H, Ph-CH<sub>2</sub>-N), 4.04 (dd, *J* = 10.8/4.3 Hz, 2H, CH<sub>2equat</sub>-O-CH<sub>2equat</sub>), 7.28-7.37 (m, 3H, 4-CH, 3-CH<sub>phenyl</sub>, 5-CH<sub>phenyl</sub>), 7.45-7.54 (m, 3H, 9-CH, 6,7-CH<sub>naphthyl</sub>), 7.55-7.61 (m, 3H, 3-CH, 2-CH<sub>phenyl</sub>, 6-CH<sub>phenyl</sub>), 7.63 (s, 1H, N-H), 7.68 (d, *J* = 2.0 Hz, 1H, 1-CH), 7.74 (dd, *J* = 8.5/1.9 Hz, 1H, 3-CH<sub>naphthyl</sub>), 7.82-7.98 (m, 3H, 1-CH<sub>naphthyl</sub>, 5,8-CH<sub>naphthyl</sub>), 8.04 (d, *J* = 1.8 Hz, 1H, 4-CH<sub>naphthyl</sub>). <sup>13</sup>C NMR (CDCl<sub>3</sub>):  $\delta$  (ppm) = 28.4 (C-6), 29.6 (C-3<sub>pyran</sub>, C-5<sub>pyran</sub>), 30.9 (C-7), 35.1 (C-5), 38.0 (N-CH<sub>3</sub>), 57.7 (Ph-CH<sub>2</sub>-N), 60.0 (C-4<sub>pyran</sub>), 68.2 (C-2<sub>pyran</sub>, C-6<sub>pyran</sub>), 120.5 (C-2<sub>phenyl</sub>, C-6<sub>phenyl</sub>), 125.8 (C-3<sub>naphthyl</sub>), 126.0 (C-4<sub>naphthyl</sub>), 126.4 (C-7<sub>naphthyl</sub>), 126.8 (C-3), 127.8 (C-1<sub>naphthyl</sub>), 128.1 (C-5<sub>naphthyl</sub>), 128.6 (C-8<sub>naphthyl</sub>), 128.9 (C-6<sub>naphthyl</sub>), 129.9 (C-3<sub>phenyl</sub>, C-5<sub>phenyl</sub>), 130.5 (C-4), 131.6 (C-1), 133.1 (C-4<sub>naphthyl</sub>), 134.1 (C-8<sub>naphthyl</sub>), 134.7 (C-9), 135.3 (C-4a), 136.4 (C-2<sub>naphthyl</sub>), 137.3 (C-4<sub>phenyl</sub>), 138.2 (C-1<sub>phenyl</sub>), 138.6 (C-2), 139.6 (C-9a), 142.1 (C-8), 168.5 (O=C-NH). FT-IR (neat):  $\tilde{\nu}$  (cm<sup>-1</sup>) = 3298 (N-H), 2970, 2940 (C-H<sub>alkyl</sub>), 1645 (C=O), 1099, 1010 (C-O).

**2-(2-Fluoropyridin-3-yl)-*N*-{4-[*N*-methyl-*N*-(tetrahydro-2*H*-pyran-4-yl)aminomethyl]phenyl}-6,7-dihydro-5*H*-benzo[7]annulene-8-carboxamide (**9j**)**

According to general procedure A amide **7** (150 mg, 0.32 mmol), PdCl<sub>2</sub>(dppf) (12 mg, 0.016 mmol, 5 mol%), KOAc (40 mg, 0.64 mmol, 2 eq.) and 2-fluoropyridine-3-ylboronic acid (68 mg, 0.48 mmol, 1.5 eq.) were suspended in dry dimethoxyethane (8 mL). The crude product was purified by fc (CH<sub>2</sub>Cl<sub>2</sub>: EtOAc + 5 % MeOH = 2:1) and recrystallized

from acetonitrile to give **9j** as a pale yellow solid.  $R_f = 0.17$  ( $\text{CH}_2\text{Cl}_2$  :  $\text{MeOH} = 95:5$ ), mp 154-156 °C, yield 59 mg (60 %).  $\text{C}_{30}\text{H}_{32}\text{FN}_3\text{O}_2$  (485.6 g/mol). Purity (HPLC): 98 %,  $t_R = 18.35$  min. HRMS (APCI):  $m/z = \text{calcd. for } \text{C}_{30}\text{H}_{33}\text{FN}_3\text{O}_2 [\text{MH}^+] 486.2551$ , found 486.2524.  $^1\text{H}$  NMR ( $\text{CDCl}_3$ ):  $\delta$  (ppm) = 1.63-1.85 (m, 4H, 3- $\text{CH}_2$ pyran, 5- $\text{CH}_2$ pyran), 2.12-2.20 (m, 2H, 6- $\text{CH}_2$ ), 2.24 (s, 3H, N- $\text{CH}_3$ ), 2.64-2.81 (m, 3H, 4- $\text{CH}$ pyran, 7- $\text{CH}_2$ ), 2.84-2.96 (m, 2H, 5- $\text{CH}_2$ ), 3.37 (td,  $J = 11.7/2.2$  Hz, 2H,  $\text{CH}_2$ axial-O- $\text{CH}_2$ axial), 3.61 (s, 2H, Ph- $\text{CH}_2$ -N), 4.04 (dd,  $J = 11.2/4.4$  Hz, 2H,  $\text{CH}_2$ equat-O- $\text{CH}_2$ equat), 7.26 (m, 1H, 4-CH), 7.27-7.32 (m, 2H, 9-CH, 5- $\text{CH}$ pyridine), 7.34 (d,  $J = 7.9$  Hz, 2H, 3- $\text{CH}$ phenyl, 5- $\text{CH}$ phenyl), 7.43 (d,  $J = 7.8$  Hz, 1H, 3-CH), 7.50 (s, 1H, 1-CH), 7.57 (d,  $J = 8.4$  Hz, 2H, 2- $\text{H}$ phenyl, 6- $\text{H}$ phenyl), 7.69 (s, 1H, N-H), 7.87 (ddd,  $J = 9.7/7.4/2.0$  Hz, 1H, 4- $\text{CH}$ pyridine), 8.20 (d,  $J = 4.6$  Hz, 1H, 6- $\text{CH}$ pyridine).  $^{13}\text{C}$  NMR ( $\text{CDCl}_3$ ):  $\delta$  (ppm) = 28.3 (C-6), 29.5 (C-3pyran, C-5pyran), 30.9 (C-7), 35.2 (C-5), 37.8 (N- $\text{CH}_3$ ), 57.7 (Ph- $\text{CH}_2$ -N), 60.0 (C-4pyran), 68.0 (C-2pyran, C-6pyran), 120.5 (C-2phenyl, C-6phenyl), 122.3 (d,  $J = 4.3$  Hz, C-3pyridine), 123.5 (C-3), 129.1 (d,  $J = 2.6$  Hz, C-5pyridine), 130.1 (C-3phenyl, C-5phenyl), 130.4 (C-4), 132.4 (C-2), 132.7 (C-4phenyl), 132.8 (C-1), 134.1 (C-9), 135.3 (C-4a), 139.0 (C-1phenyl), 140.9 (C-9a), 140.9 (d,  $J = 10.7$  Hz, C-4pyridine), 143.3 (C-8), 146.8 (d,  $J = 14.6$  Hz, C-6pyridine), 162.1 (d,  $J = 238.1$  Hz, C-2pyridine), 168.4 (O=C-NH). FT-IR (neat):  $\tilde{\nu}$  ( $\text{cm}^{-1}$ ) = 3294 (N-H), 2943, 2924 (C-Halkyl), 1647 (C=O), 1141, 1010 (C-O), 759, 725 (out of plane).

**2-(6-Isopropoxypyridin-3-yl)-N-{4-[N-methyl-N-(tetrahydro-2H-pyran-4-yl)aminomethyl]phenyl}-6,7-dihydro-5H-benzo[7]annulene-8-carboxamide (**9k**)**

According to general procedure A amide **7** (172 mg, 0.37 mmol),  $\text{PdCl}_2(\text{dppf})$  (15 mg, 0.02 mmol, 5 mol%), KOAc (73 mg, 0.74 mmol, 2 eq.) and 6-isopropoxypyridine-3-ylboronic acid (100 mg, 0.55 mmol, 1.5 eq.) were suspended in dry dimethoxyethane (10 mL). The crude product was purified by fc ( $\text{CH}_2\text{Cl}_2$ : EtOAc + 5 %  $\text{MeOH} = 2:1$ ) and recrystallized from acetonitrile to give **9k** as a colorless solid.  $R_f = 0.06$  ( $\text{CH}_2\text{Cl}_2$ : EtOAc + 5 %  $\text{MeOH} = 2:1$ ), mp 173-175 °C, yield 132 mg (67 %).  $\text{C}_{33}\text{H}_{39}\text{N}_3\text{O}_3$  (525.7 g/mol). Purity (HPLC): 99 %,  $t_R = 19.75$  min. HRMS (APCI):  $m/z = \text{calcd. for } \text{C}_{33}\text{H}_{40}\text{N}_3\text{O}_3 [\text{MH}^+] 526.3064$ , found 526.3077.  $^1\text{H}$  NMR ( $\text{CDCl}_3$ ):  $\delta$  (ppm) = 1.38 (d, 6.2 Hz, 6H,  $\text{CH}(\text{CH}_3)_2$ ), 1.52-1.87 (m, 4H, 3- $\text{CH}_2$ pyran, 5- $\text{CH}_2$ pyran), 2.07-2.20 (m, 2H, 6- $\text{CH}_2$ ), 2.21 (s, 3H, N- $\text{CH}_3$ ), 2.58-2.69 (m, 1H, 4- $\text{CH}$ pyran), 2.72 (t,  $J = 6.6$  Hz, 2H, 7- $\text{CH}_2$ ), 2.81-2.98 (m, 2H, 5- $\text{CH}_2$ ), 3.37 (td,  $J = 11.6/2.3$  Hz, 2H,  $\text{CH}_2$ axial-O- $\text{CH}_2$ axial), 3.57 (s, 2H, Ph- $\text{CH}_2$ -N), 4.04 (dd,  $J = 11.5/4.3$  Hz, 2H,  $\text{CH}_2$ equat-O- $\text{CH}_2$ equat), 5.34 (sept.,  $J = 6.2$  Hz, 1H,  $\text{CH}(\text{CH}_3)_2$ ), 6.75 (d,  $J = 8.6$  Hz, 1H, 5- $\text{CH}$ pyridine), 7.24 (d,  $J = 8.1$  Hz, 1H, 4-CH), 7.31 (d,  $J = 8.2$  Hz, 2H, 3-

$CH_{\text{phenyl}}$ , 5- $CH_{\text{phenyl}}$ ), 7.37 (dd,  $J = 7.9/1.8$  Hz, 1H, 3- $CH$ ), 7.40 (s, 1H, 9- $CH$ ), 7.44 (s, 1H, 1- $CH$ ), 7.56 (d,  $J = 8.4$  Hz, 2H, 2- $H_{\text{phenyl}}$ , 6- $H_{\text{phenyl}}$ ), 7.64 (s, 1H, N- $H$ ), 7.75 (dd,  $J = 8.6/2.6$  Hz, 1H, 4- $CH_{\text{pyridine}}$ ), 8.35 (d,  $J = 2.6$  Hz, 1H, 2- $CH_{\text{pyridine}}$ ).  $^{13}\text{C}$  NMR ( $\text{CDCl}_3$ ):  $\delta$  (ppm) = 22.6 ( $\text{CH}(\text{CH}_3)_2$ ), 28.5 (C-6), 29.7 (C-3<sub>pyran</sub>, C-5<sub>pyran</sub>), 30.9 (C-7), 35.0 (C-5), 37.9 (N- $\text{CH}_3$ ), 57.7 (Ph- $\text{CH}_2\text{-N}$ ), 60.0 (C-4<sub>pyran</sub>), 68.2 (C-2<sub>pyran</sub>, C-6<sub>pyran</sub>), 68.6 ( $\text{CH}(\text{CH}_3)_2$ ), 111.9 (C-5<sub>pyridine</sub>), 120.5 (C-2<sub>phenyl</sub>, C-6<sub>phenyl</sub>), 126.9 (C-3), 129.3 (C-2), 129.9 (C-3<sub>phenyl</sub>, C-5<sub>phenyl</sub>), 130.5 (C-4), 130.7 (C-1), 134.5 (C-9), 135.4 (C-4a), 136.6 (C-4<sub>phenyl</sub>), 137.2 (C-4<sub>pyridine</sub>), 137.7 (C-9a, C-3<sub>pyridine</sub>), 138.7 (C-1<sub>phenyl</sub>), 141.9 (C-8), 145.3 (C-2<sub>pyridine</sub>), 163.4 (C-6<sub>pyridine</sub>), 168.3 (O=C-NH). FT-IR (neat):  $\tilde{\nu}$  ( $\text{cm}^{-1}$ ) = 3321 (N-H), 2924, 2835 (C-H<sub>alkyl</sub>), 1643 (C=O), 1114, 1049 (C-O), 709, 686 (out of plane bending).

**2-(4-Fluorophenyl)-*N*-[*N*-methyl-*N*-(tetrahydro-2*H*-pyran-4-yl)aminomethyl]phenyl]-6,7-dihydro-5*H*-benzo[7]annulene-8-carboxamide (9I)**

According to general procedure A amide **7** (57 mg, 0.12 mmol),  $\text{PdCl}_2(\text{dppf})$  (10 mg, 0.01 mmol, 10 mol%),  $\text{NaOCH}_3$  (14 mg, 0.24 mmol, 2 eq.) and 4-fluorophenylboronic acid (19 mg, 0.13 mmol, 1.1 eq.) were suspended in dry dimethoxyethane (5 mL). The crude product was purified by fc (EtOAc : MeOH = 95:5) and recrystallized from acetonitrile to give **9I** as a colorless solid.  $R_f = 0.25$  ( $\text{CH}_2\text{Cl}_2$  : MeOH = 95:5), mp 192 °C, yield 38 mg (65 %).  $\text{C}_{31}\text{H}_{33}\text{FN}_2\text{O}_2$  (484.6 g/mol). Purity (HPLC): 97 %,  $t_R = 20.78$  min. HRMS (APCI):  $m/z = \text{calcd. for } \text{C}_{31}\text{H}_{34}\text{FN}_2\text{O}_2 [\text{MH}^+] 485.2599$ , found 485.2598.  $^1\text{H}$  NMR ( $\text{CDCl}_3$ ):  $\delta$  (ppm) = 1.59-1.84 (m, 4H, 3- $\text{CH}_2$ <sub>pyran</sub>, 5- $\text{CH}_2$ <sub>pyran</sub>), 2.10-2.22 (m, 2H, 6- $\text{CH}_2$ ), 2.24 (s, 3H, N- $\text{CH}_3$ ), 2.64-2.77 (m, 3H, 4- $\text{CH}_{\text{pyran}}$ , 7- $\text{CH}_2$ ), 2.82-2.95 (m, 2H, 5- $\text{CH}_2$ ), 3.37 (td,  $J = 11.7/2.1$  Hz, 2H,  $\text{CH}_2^{\text{axial}}\text{-O-CH}_2^{\text{axial}}$ ), 3.61 (s, 2H, Ph- $\text{CH}_2\text{-N}$ ), 4.04 (dd,  $J = 11.0/3.9$  Hz, 2H,  $\text{CH}_2^{\text{equat}}\text{-O-CH}_2^{\text{equat}}$ ), 7.09 (m, 2H, 3- $\text{CHF-phen}$ , 5- $\text{CHF-phen}$ ), 7.24 (d,  $J = 7.8$  Hz, 1H, 4- $CH$ ), 7.34 (d,  $J = 8.1$  Hz, 2H, 3- $\text{CH}_{\text{phenyl}}$ , 5- $\text{CH}_{\text{phenyl}}$ ), 7.40 (dd,  $J = 7.8/2.0$  Hz, 1H, 3- $CH$ ), 7.42 (s, 1H, 9- $CH$ ), 7.48 (d,  $J = 1.8$  Hz, 1H, 1- $CH$ ), 7.51-7.55 (m, 2H, 2- $\text{CHF-phen}$ , 6- $\text{CHF-phen}$ ), 7.57 (d,  $J = 8.4$  Hz, 2H, 2- $\text{CH}_{\text{phenyl}}$ , 6- $\text{CH}_{\text{phenyl}}$ ), 7.64 (s, 1H, N- $H$ ).  $^{13}\text{C}$  NMR ( $\text{CDCl}_3$ ):  $\delta$  (ppm) = 27.7 (C-6), 28.9 (C-3<sub>pyran</sub>, C-5<sub>pyran</sub>), 30.3 (C-7), 34.4 (C-5), 37.2 (N- $\text{CH}_3$ ), 57.1 (Ph- $\text{CH}_2\text{-N}$ ), 59.4 (C-4<sub>pyran</sub>), 67.4 (C-2<sub>pyran</sub>, C-6<sub>pyran</sub>), 115.5 (d,  $J = 21.5$  Hz, C-3<sub>F-phen</sub>, C-5<sub>F-phen</sub>), 119.8 (C-2<sub>phenyl</sub>, C-6<sub>phenyl</sub>), 126.7 (C-3), 128.3 (d,  $J = 8.0$  Hz, C-2<sub>F-phen</sub>, C-6<sub>F-phen</sub>), 129.4 (C-3<sub>phenyl</sub>, C-5<sub>phenyl</sub>), 129.8 (C-4), 130.5 (C-1), 134.0 (C-9a), 134.6 (C-4<sub>phenyl</sub>), 135.5 (C-9), 135.9 (C-4a), 136.3 (d,  $J = 3.1$  Hz, C-1<sub>F-phen</sub>), 137.9 (C-2), 138.1 (C-1<sub>phenyl</sub>), 141.3 (C-8), 162.3 (d,  $J = 248.6$  Hz, C-4<sub>F-phen</sub>), 167.7 (O=C-NH).

FT-IR (neat):  $\tilde{\nu}$  (cm<sup>-1</sup>) = 3298 (N-H), 2939, 2924 (C-H<sub>alkyl</sub>), 1647 (C=O), 1141, 1010 (C-O).

**2-(4-Fluoro-3-methylphenyl)-*N*-{4-[*N*-methyl-*N*-(tetrahydro-2*H*-pyran-4-yl)aminomethyl]phenyl}-6,7-dihydro-5*H*-benzo[7]annulene-8-carboxamide (**9m**)**

According to general procedure A amide **7** (65 mg, 0.14 mmol), PdCl<sub>2</sub>(dppf) (12 mg, 0.01 mmol, 10 mol%), K<sub>2</sub>CO<sub>3</sub> (59 mg, 0.42 mmol, 3 eq.) and 4-fluoro-3-methylphenylboronic acid (24 mg, 0.15 mmol, 1.1 eq.) were suspended in dry dimethoxyethane (5 mL). The crude product was purified by fc (EtOAc : MeOH = 95:5) and recrystallized from acetonitrile to give **9m** as a colorless solid. *R*<sub>f</sub> = 0.33, CH<sub>2</sub>Cl<sub>2</sub> : MeOH = 95:5, mp 161-162 °C (dec.) yield 48 mg (70 %). C<sub>32</sub>H<sub>35</sub>FN<sub>2</sub>O<sub>2</sub> (498.6 g/mol). Purity (HPLC): 98 %, *t*<sub>R</sub> = 21.48 min. HRMS (APCI): *m/z* = calcd. for C<sub>32</sub>H<sub>36</sub>FN<sub>2</sub>O<sub>2</sub> [MH<sup>+</sup>] 499.2755, found 499.2773. <sup>1</sup>H NMR (CDCl<sub>3</sub>):  $\delta$  (ppm) = 1.61-1.90 (m, 4H, 3-CH<sub>2</sub>pyran, 5-CH<sub>2</sub>pyran), 2.10-2.22 (m, 2H, 6-CH<sub>2</sub>), 2.28 (s, 3H, N-CH<sub>3</sub>), 2.34 (s, 3H, CH<sub>3</sub>F-phen.), 2.72 (t, *J* = 6.2 Hz, 2H, 7-CH<sub>2</sub>), 2.74-2.81 (m, 1H, 4-CH<sub>pyran</sub>), 2.84-2.93 (m, 2H, 5-CH<sub>2</sub>), 3.37 (td, *J* = 11.7/2.0 Hz, 2H, CH<sub>2axial</sub>-O-CH<sub>2axial</sub>), 3.67 (s, 2H, Ph-CH<sub>2</sub>-N), 4.05 (dd, *J* = 11.2/3.9 Hz, 2H, CH<sub>2equat</sub>-O-CH<sub>2equat</sub>), 7.06 (m, 5-CH<sub>F-phen</sub>), 7.23 (d, *J* = 7.7 Hz, 1H, 4-CH), 7.30-7.37 (m, 2H, 2-CH<sub>F-phen</sub>, 3-CH), 7.36 (d, *J* = 8.6 Hz, 2H, 3-CH<sub>phenyl</sub>, 5-CH<sub>phenyl</sub>), 7.40 (m, 1H, 6-CH<sub>F-phen</sub>), 7.42 (s, 1H, 9-CH), 7.48 (d, *J* = 1.8 Hz, 1H, 1-CH), 7.58 (d, *J* = 8.4 Hz, 2H, 2-CH<sub>phenyl</sub>, 6-CH<sub>phenyl</sub>), 7.66 (s, 1H, N-H). <sup>13</sup>C NMR (CDCl<sub>3</sub>):  $\delta$  (ppm) = 14.56 (d, *J* = 3.2 Hz, CH<sub>3</sub>F-phen), 27.7 (C-6), 28.3 (C-3<sub>pyran</sub>, C-5<sub>pyran</sub>), 30.3 (C-7), 34.4 (C-5), 36.5 (N-CH<sub>3</sub>), 56.7 (Ph-CH<sub>2</sub>-N), 59.8 (C-4<sub>pyran</sub>), 67.1 (C-2<sub>pyran</sub>, C-6<sub>pyran</sub>), 115.1 (d, *J* = 21.5 Hz, C-5<sub>F-phen</sub>), 120.0 (C-2<sub>phenyl</sub>, C-6<sub>phenyl</sub>), 125.5 (d, *J* = 8.2 Hz, C-6<sub>F-phen</sub>), 126.7 (C-3), 129.8 (C-4), 129.8 (d, *J* = 5.2 Hz, C-2<sub>F-phen</sub>), 130.0 (C-3<sub>phenyl</sub>, C-5<sub>phenyl</sub>), 130.5 (C-1), 134.4 (d, *J* = 18.8 Hz, C-3<sub>F-phen</sub>), 134.0 (C-9a), 134.6 (C-4<sub>phenyl</sub>), 135.9 (C-9), 136.0 (d, *J* = 3.7 Hz, C-1<sub>F-phen</sub>), 136.3 (C-4a), 137.7 (C-2), 138.3 (C-1<sub>phenyl</sub>), 141.2 (C-8), 160.9 (d, *J* = 245.2 Hz, C-4<sub>F-phen</sub>), 167.8 (O=C-NH). FT-IR (neat):  $\tilde{\nu}$  (cm<sup>-1</sup>) = 3286 (N-H), 2924, 2843 (C-H<sub>alkyl</sub>), 1651 (C=O), 1138, 1006 (C-O).

**2-(4-Hydroxy-3-methylphenyl)-*N*-{4-[*N*-methyl-*N*-(tetrahydro-2*H*-pyran-4-yl)aminomethyl]phenyl}-6,7-dihydro-5*H*-benzo[7]annulene-8-carboxamide (**9o**)**

According to general procedure A amide **7** (162 mg, 0.34 mmol), PdCl<sub>2</sub>(dppf) (14 mg, 0.017 mmol, 5 mol%), NaOCH<sub>3</sub> (38 mg, 0.68 mmol, 2 eq.) and 4-hydroxy-3-methylphenylboronic acid (90 mg, 0.38 mmol, 1.1 eq.) were suspended in dry

dimethoxyethane (7 mL). The crude product was purified by fc (EtOAc : MeOH = 95:5) and recrystallized from acetonitrile to give **9o** as a colorless solid.  $R_f = 0.11$  ( $\text{CH}_2\text{Cl}_2$  : EtOAc + 5 % MeOH = 2:1), mp 192 °C, yield 128 mg (76 %).

$\text{C}_{32}\text{H}_{36}\text{N}_2\text{O}_3$  (496.6 g/mol). Purity (HPLC): 96 %,  $t_R = 19.32$  min. HRMS (APCI):  $m/z =$  calcd. for  $\text{C}_{32}\text{H}_{37}\text{N}_2\text{O}_3$   $[\text{MH}^+]$  497.2799, found 497.2778.  $^1\text{H}$  NMR ( $\text{CDCl}_3$ ):  $\delta$  (ppm) = 1.55-1.73 (m, 4H, 3- $\text{CH}_2$ pyran, 5- $\text{CH}_2$ pyran), 2.03-2.12 (m, 2H, 6- $\text{CH}_2$ ), 2.14 (s, 3H,  $\text{CH}_3$ hydroxyphen.), 2.25 (s, 3H, N- $\text{CH}_3$ ), 2.51-2.62 (m, 1H, 4- $\text{CH}$ pyran.), 2.65 (t,  $J = 6.5$  Hz, 2H, 7- $\text{CH}_2$ ), 2.76-2.86 (m, 2H, 5- $\text{CH}_2$ ), 3.37 (td,  $J = 11.6/2.4$  Hz, 2H,  $\text{CH}_{2\text{axial}}\text{-O-CH}_{2\text{axial}}$ ), 3.50 (s, 2H, Ph- $\text{CH}_2\text{-N}$ ), 3.97 (dd,  $J = 10.9/4.3$  Hz, 2H,  $\text{CH}_{2\text{equat}}\text{-O-CH}_{2\text{equat}}$ ), 6.76 (d,  $J = 8.2$  Hz, 1H, 5- $\text{CH}$ hydroxyphen), 7.13 (d,  $J = 7.9$  Hz, 1H, 4- $\text{CH}$ ), 7.22 (d,  $J = 2.2$  Hz, 1H, 2- $\text{CH}$ hydroxyphen), 7.24 (d,  $J = 8.3$  Hz, 2H, 3- $\text{CH}$ phenyl, 5- $\text{CH}$ phenyl), 7.29 (m, 1H, 6- $\text{CH}$ hydroxyphen), 7.30-7.36 (m, 2H, 9- $\text{CH}$ , 3- $\text{CH}$ ), 7.40 (d,  $J = 2.0$  Hz, 1H, 1- $\text{CH}$ ), 7.49 (d,  $J = 8.4$  Hz, 2H, 2- $\text{CH}$ phenyl, 6- $\text{CH}$ phenyl), 7.56 (s, 1H, N- $\text{H}$ ).  $^{13}\text{C}$  NMR ( $\text{DMSO-d}_6$ ):  $\delta$  (ppm) = 16.2 ( $\text{CH}_3\text{HO-phen}$ ), 27.5 (C-6), 28.9 (C-3pyran, C-5pyran), 30.2 (C-7), 34.0 (C-5), 37.1 (N- $\text{CH}_3$ ), 56.7 (Ph- $\text{CH}_2\text{-N}$ ), 58.9 (C-4pyran), 66.7 (C-2pyran, C-6pyran), 109.3 (C-5HO-phen), 115.0 (C-6HO-phen), 119.9 (C-2phenyl, C-6phenyl), 124.3 (C-3), 124.7 (C-3HO-phen), 125.5 (C-2HO-phen), 128.7 (C-3phenyl, C-5phenyl), 129.5 (C-4), 129.8 (C-1), 130.2 (C-9a), 131.4, 133.4 (C-4phenyl), 134.7 (C-9), 134.9 (C-4a), 137.9 (C-2), 138.1 (C-1HO-phen), 138.2 (C-1phenyl), 140.0 (C-8), 155.2 (C-4HO-phen), 168.3 (O=C-NH). FT-IR (neat):  $\tilde{\nu}$  ( $\text{cm}^{-1}$ ) = 3352 (N-H), 2927, 2846 (C-Halkyl), 1647 (C=O), 1161, 1083 (C-O), 810, 671 (out of plane bending).

**2-[4-(Hydroxymethyl)phenyl]-*N*-{4-[*N*-methyl-*N*-(tetrahydro-2*H*-pyran-4-yl)aminomethyl]phenyl}-6,7-dihydro-5*H*-benzo[7]annulene-8-carboxamide (**9p**)**

According to general procedure A amide **7** (100 mg, 0.21 mmol),  $\text{PdCl}_2(\text{dppf})$  (15 mg, 0.02 mmol, 10 mol%),  $\text{NaOCH}_3$  (23 mg, 0.42 mmol, 2 eq.) and 4-(hydroxymethyl)phenylboronic acid (35 mg, 0.23 mmol, 1.1 eq.) were suspended in dry dimethoxyethane (6 mL). The crude product was purified by fc (EtOAc : MeOH = 95:5) and recrystallized from acetonitrile to give **9p** as a colorless solid.  $R_f = 0.08$  ( $\text{CH}_2\text{Cl}_2$  : MeOH = 95:5), mp 210 °C (dec.), yield 53 mg (51 %).

$\text{C}_{32}\text{H}_{36}\text{N}_2\text{O}_2$  (496.6 g/mol). Purity (HPLC): 96 %,  $t_R = 18.37$  min. HRMS (APCI):  $m/z =$  calcd. for  $\text{C}_{32}\text{H}_{37}\text{N}_2\text{O}_3$   $[\text{MH}^+]$  497.2799, found 497.2798.  $^1\text{H}$  NMR ( $\text{CDCl}_3$ ):  $\delta$  (ppm) = 1.57-1.86 (m, 4H, 3- $\text{CH}_2$ pyran, 5- $\text{CH}_2$ pyran), 2.10-2.22 (m, 2H, 6- $\text{CH}_2$ ), 2.23 (s, 3H, N- $\text{CH}_3$ ), 2.62-2.71 (m, 1H, 4- $\text{CH}$ pyran), 2.71-2.77 (m, 2H, 7- $\text{CH}_2$ ), 2.84-2.93 (m, 2H, 5- $\text{CH}_2$ ), 3.37 (td,  $J = 11.7/4.4$  Hz, 2H,  $\text{CH}_{2\text{axial}}\text{-O-CH}_{2\text{axial}}$ ), 3.60 (s, 2H, Ph- $\text{CH}_2\text{-N}$ ), 4.04 (dd,  $J =$

11.0/3.9 Hz, 2H, CH<sub>2</sub><sub>equat</sub>-O-CH<sub>2</sub><sub>equat</sub>), 4.75 (s, 2H, CH<sub>2</sub>OH), 7.25 (d, *J* = 7.8 Hz, 1H, 4-CH), 7.33 (d, *J* = 8.0 Hz, 2H, 3-CH<sub>phenyl</sub>, 5-CH<sub>phenyl</sub>), 7.42 (s, 1H, 9-CH), 7.43-7.47 (m, 3H, 3-CH, 3-CH<sub>hydroxymethylphen</sub>, 5-CH<sub>hydroxymethylphen</sub>), 7.53 (d, *J* = 2.0 Hz, 1H, 1-CH) 7.56 (d, *J* 7.5 Hz, 2H, 2-CH<sub>hydroxymethylphen</sub>, 6-CH<sub>hydroxymethylphen</sub>), 7.58 (d, *J* = 8.1 Hz, 2H, 2-CH<sub>phenyl</sub>, 6-CH<sub>phenyl</sub>), 7.66 (s, 1H, N-H). <sup>13</sup>C NMR (CDCl<sub>3</sub>): δ (ppm) = 28.1 (C-6), 29.3 (C-3<sub>pyran</sub>, C-5<sub>pyran</sub>), 30.6 (C-7), 34.7 (C-5), 37.7 (N-CH<sub>3</sub>), 57.4 (Ph-CH<sub>2</sub>-N), 59.7 (C-4<sub>pyran</sub>), 65.2 (CH<sub>2</sub>OH), 67.8 (C-2<sub>pyran</sub>, C-6<sub>pyran</sub>), 120.2 (C-2<sub>phenyl</sub>, C-6<sub>phenyl</sub>), 127.1 (C-3), 127.2 (C-2<sub>hydroxymethylphen</sub>, C-6<sub>hydroxymethylphen</sub>), 127.6 (C-3<sub>hydroxymethylphen</sub>, C-5<sub>hydroxymethylphen</sub>), 129.6 (C-3<sub>phenyl</sub>, C-5<sub>phenyl</sub>), 130.1 (C-4), 130.9 (C-1), 134.4 (C-9a), 134.8 (C-4<sub>phenyl</sub>), 135.8 (C-9), 138.2 (C-2), 138.9 (C-1<sub>phenyl</sub>), 139.9 (C-8), 141.7 (C-4<sub>hydroxymethylphen</sub>), 148.8 (C-1<sub>hydroxymethylphen</sub>). Signals for quaternary carbon atoms O=C-NH and C-4a are not visible.

**2-(5-Formylthiophen-2-yl)-N-{4-[(methyl-N-(tetrahydro-2H-pyran-4-yl)aminomethyl]phenyl}-6,7-dihydro-5H-benzo[7]annulene-8-carboxamide (9v)**

According to general procedure A amide **7** (60 mg, 0.13 mmol), PdCl<sub>2</sub>(dppf) (10 mg, 0.01 mmol, 10 mol%), NaOCH<sub>3</sub> (14 mg, 0.25 mmol, 2 eq.) and 5-formylthiophen-2-ylboronic acid (50 mg, 0.32 mmol, 1.5 eq.) were suspended in dry dimethoxyethane (5 mL). The crude product was purified by fc (EtOAc : MeOH = 95:5) and recrystallized from acetonitrile to give **9v** as an orange solid. R<sub>f</sub> = 0.23 (CH<sub>2</sub>Cl<sub>2</sub> : MeOH = 95:5), mp 168-169 °C, yield 43 mg (86 %). C<sub>30</sub>H<sub>32</sub>N<sub>2</sub>O<sub>3</sub>S (500.6 g/mol). Purity (HPLC): 98 %, t<sub>R</sub> = 19.66 min. HRMS (APCI): m/z = calcd. for C<sub>30</sub>H<sub>33</sub>N<sub>2</sub>O<sub>3</sub>S [MH<sup>+</sup>] 501.2206, found 501.2223. <sup>1</sup>H NMR (CDCl<sub>3</sub>): δ (ppm) = 1.63-1.85 (m, 4H, 3-CH<sub>2</sub><sub>pyran</sub>, 5-CH<sub>2</sub><sub>pyran</sub>), 2.09-2.22 (m, 2H, 6-CH<sub>2</sub>), 2.25 (s, 3H, N-CH<sub>3</sub>), 2.63-2.81 (m, 3H, 4-CH<sub>pyran</sub>, 7-CH<sub>2</sub>), 2.82-2.95 (m, 2H, 5-CH<sub>2</sub>), 3.37 (td, *J* = 11.7/2.2 Hz, 2H, CH<sub>2</sub><sub>axial</sub>-O-CH<sub>2</sub><sub>axial</sub>), 3.63 (s, 2H, Ph-CH<sub>2</sub>-N), 4.05 (dd, *J* = 11.6/4.1 Hz, 2H, CH<sub>2</sub><sub>equat</sub>-O-CH<sub>2</sub><sub>equat</sub>), 7.23-7.26 (m, 1H, 4-CH), 7.26 (s, 1H, 9-CH), 7.36 (d, *J* = 7.4 Hz, 2H, 3-CH<sub>phenyl</sub>, 5-CH<sub>phenyl</sub>), 7.39 (d, *J* = 4.1 Hz, 1H, 4-CH<sub>thioph</sub>), 7.52 (dd, *J* = 7.8/2.0 Hz, 1H, 3-CH), 7.58 (d, *J* = 8.6 Hz, 2H, 2-H<sub>phenyl</sub>, 6-H<sub>phenyl</sub>), 7.61 (d, *J* = 1.9 Hz, 1H, 1-CH), 7.67 (s, 1H, N-H), 7.74 (d, *J* = 3.9 Hz, 1H, 3-CH<sub>thioph</sub>), 9.89 (s, 1H, CHO). <sup>13</sup>C NMR (CDCl<sub>3</sub>): δ (ppm) = 28.3 (C-6), 29.2 (C-3<sub>pyran</sub>, C-5<sub>pyran</sub>), 30.9 (C-7), 35.2 (C-5), 37.5 (N-CH<sub>3</sub>), 57.5 (Ph-CH<sub>2</sub>-N), 60.1 (C-4<sub>pyran</sub>), 67.9 (C-2<sub>pyran</sub>, C-6<sub>pyran</sub>), 120.6 (C-2<sub>phenyl</sub>, C-6<sub>phenyl</sub>), 126.6 (C-3), 130.3 (C-3<sub>phenyl</sub>, C-5<sub>phenyl</sub>), 130.3 (C-4), 130.7 (C-3<sub>thioph</sub>), 131.6 (C-1), 133.8 (C-9), 135.4 (C-4a), 138.0 (C-4<sub>thioph</sub>, C-4<sub>phenyl</sub>), 139.4 (C-1<sub>phenyl</sub>), 138.0 (C-2), 139.4 (C-9a), 142.7 (C-8), 144.4 (C-2<sub>thioph</sub>), 154.1 (C-5<sub>thioph</sub>), 168.3 (O=C-NH), 183.2 (HC=O). FT-IR (neat):  $\tilde{\nu}$  (cm<sup>-1</sup>) = 3290 (N-H), 2924, 2843 (C-H<sub>alkyl</sub>),



2789 (H-CO), 1647 (HC=O), 1593 (C=C<sub>aryl</sub>), 1141, 1010 (C-O), 767, 667 out of plane bending.

**2-(4-Methylphenyl)-N-{4-[N-methyl-N-(tetrahydro-2H-pyran-4-yl)aminomethyl]-phenyl}-7,8-dihydro-6H-[7]annuleno[b]thiophene-5-carboxamide (14a)**

N-(4-Aminophenyl)-N-methyltetrahydro-2H-pyran-4-amin (78 mg, 0.35 mmol, 1 eq.) was added to a vigorously stirred mixture of acid **13a**<sup>40</sup> (100 mg, 0.35 mmol), triethylamine (71 mg, 0.70 mmol, 2 eq.) and HATU™ (150 mg, 0.38 mmol, 1.1 eq.) in THF (5 mL). The mixture was stirred overnight at rt. The mixture was concentrated *in vacuo* and the residue was purified by fc (EtOAc : CH<sub>2</sub>Cl<sub>2</sub> = 1:2 + 5% MeOH) and recrystallized from acetonitrile to give **14a** as a yellow solid. R<sub>f</sub> = 0.13 (MeOH : CH<sub>2</sub>Cl<sub>2</sub> = 5:95), mp 201 °C, yield 136 mg (80 %). C<sub>30</sub>H<sub>34</sub>N<sub>2</sub>O<sub>2</sub>S (486.6 g/mol). Purity (HPLC): 95 %, t<sub>R</sub> = 22.85 min. HRMS (APCI): m/z = calcd. for C<sub>30</sub>H<sub>35</sub>N<sub>2</sub>O<sub>2</sub>S [MH<sup>+</sup>] 487.2414, found 487.2381. <sup>1</sup>H NMR (CDCl<sub>3</sub>): δ (ppm) = 1.55-1.83 (m, 4H, 3-CH<sub>2</sub><sub>pyran</sub>, 5-CH<sub>2</sub><sub>pyran</sub>), 2.13 (quint, J = 5.1 Hz, 2H, 7-CH<sub>2</sub>), 2.21 (s, 3H, N-CH<sub>3</sub>), 2.36 (s, 3H, CH<sub>3</sub><sub>tolyl</sub>), 2.64 (tt, J = 10.9/3.5 Hz, 1H, 4-H<sub>pyran</sub>), 2.84 (t, J = 5.8 Hz, 2H, 6-CH<sub>2</sub>), 3.11 (t, J = 5.6 Hz, 2H, 8-CH<sub>2</sub>), 3.37 (td, J = 11.6/2.3 Hz, 2H, CH<sub>2</sub><sub>axial</sub>-O-CH<sub>2</sub><sub>axial</sub>), 3.57 (s, 2H, Ph-CH<sub>2</sub>-N), 4.04 (dd, J = 11.4/4.4 Hz, 2H, CH<sub>2</sub><sub>equat</sub>-O-CH<sub>2</sub><sub>equat</sub>), 7.07 (s, 1H, 3-CH), 7.14-7.24 (m, 3H, 3-CH<sub>tolyl</sub>, 5-CH<sub>tolyl</sub>, 4-CH), 7.30 (d, J = 8.2 Hz, 2H, 3-CH<sub>phenyl</sub>, 5-CH<sub>phenyl</sub>), 7.42 (d, J = 8.1 Hz, 2H, 2-CH<sub>tolyl</sub>, 6-CH<sub>tolyl</sub>), 7.49-7.57 (m, 3H, 2-CH<sub>phenyl</sub>, 6-CH<sub>phenyl</sub>, NH). <sup>13</sup>C NMR (CDCl<sub>3</sub>): δ (ppm) = 21.6 (CH<sub>3</sub><sub>tolyl</sub>), 24.6 (C-7), 29.6 (C-3<sub>pyran</sub>, C-5<sub>pyran</sub>), 31.1 (C-8, C-6), 37.9 (N-CH<sub>3</sub>), 57.7 (C-4<sub>pyran</sub>), 59.9 (Ph-CH<sub>2</sub>-N), 68.2 (C-2<sub>pyran</sub>, C-6<sub>pyran</sub>), 120.4 (C-2<sub>phenyl</sub>, C-6<sub>phenyl</sub>), 125.8 (C-2<sub>tolyl</sub>, C-6<sub>tolyl</sub>), 127.1 (C-3), 127.7 (C-4), 129.9 (C-3<sub>phenyl</sub>, C-5<sub>phenyl</sub>), 130.0 (C-3<sub>tolyl</sub>, C-5<sub>tolyl</sub>), 131.5 (C-1<sub>tolyl</sub>), 133.8 (C-4<sub>phenyl</sub>), 136.4 (C-1<sub>phenyl</sub>), 137.7 (C-2), 137.8 (C-3a), 140.8 (C-5), 143.7 (C-8a), 146.3 (C-4<sub>tolyl</sub>), 168.7 (O=C-NH). FT-IR (neat):  $\tilde{\nu}$  (cm<sup>-1</sup>) = 3309 (N-H), 2839 (C-H<sub>alkyl</sub>), 1627 (C=O).

**2-(4-Methylphenyl)-N-[2-(tetrahydro-2H-pyran-4-yl)-1,2,3,4-tetrahydroisoquinolin-7-yl]-7,8-dihydro-6H-[7]annuleno[b]thiophene-5-carboxamide (14b)**

2-(Tetrahydro-2H-pyran-4-yl)-1,2,3,4-tetrahydroisoquinolin-7-amine (82 mg, 0.35 mmol, 1 eq.) was added to a vigorously stirred mixture of acid **13a**<sup>40</sup> (100 mg, 0.35 mmol), triethylamine (71 mg, 0.70 mmol, 2 eq.) and HATU™ (150 mg, 0.38 mmol, 1.1 eq.) in THF (5 mL). The mixture was stirred overnight at rt. The mixture was concentrated *in vacuo* and the residue was purified by fc (EtOAc : CH<sub>2</sub>Cl<sub>2</sub> = 1:2 + 5 % MeOH) ) and

recrystallized from acetonitrile to give **14b** as a yellow solid.  $R_f = 0.34$  (MeOH : CH<sub>2</sub>Cl<sub>2</sub> = 5:95), mp 215°C (dec.), yield 120 mg (69 %). C<sub>31</sub>H<sub>34</sub>N<sub>2</sub>O<sub>2</sub>S (498.6 g/mol). Purity (HPLC): 95 %,  $t_R = 20.90$  min. HRMS (APCI):  $m/z = \text{calcd. for C}_{31}\text{H}_{35}\text{N}_2\text{O}_2\text{S} [\text{MH}^+] 499.2414$ , found 499.2389. <sup>1</sup>H NMR (CDCl<sub>3</sub>):  $\delta$  (ppm) = 1.69 (dq,  $J = 12.1/4.2$  Hz, 2H, 3-CH<sub>2</sub>pyran-equat, 5-CH<sub>2</sub>pyran-equat), 1.81-1.90 (m, 2H, 3-CH<sub>2</sub>pyran-axial, 5-CH<sub>2</sub>pyran-axial), 2.11 (quint.,  $J = 5.9$  Hz, 2H, 7-CH<sub>2</sub>), 2.36 (s, 3H, CH<sub>3</sub>tolyl), 2.65 (tt,  $J = 11.1/3.8$  Hz, 1H, 4-H<sub>pyran</sub>), 2.77-2.90 (m, 6H, 6-CH<sub>2</sub>, 3-CH<sub>2</sub>isoqu, 4-CH<sub>2</sub>isoqu), 3.09 (t,  $J = 5.3$  Hz, 2H, 8-CH<sub>2</sub>), 3.42 (t,  $J = 12.1$  Hz, 2H, CH<sub>2</sub>axial-O-CH<sub>2</sub>axial), 3.77 (s, 2H, 1-CH<sub>2</sub>isoqu), 4.06 (dd,  $J = 11.8/4.0$  Hz, 2H, CH<sub>2</sub>equat-O-CH<sub>2</sub>equat), 7.05-7.08 (m, 2H, 3-CH, 5-CH<sub>isoqu</sub>), 7.14-7.24 (m, 3H, 3-CH<sub>tolyl</sub>, 5-CH<sub>tolyl</sub>, 4-CH), 7.21 (dd,  $J = 8.2/2.2$  Hz, 1H, 6-CH<sub>isoqu</sub>), 7.41 (d,  $J = 7.7$  Hz, 2H, 2-CH<sub>tolyl</sub>, 6-CH<sub>tolyl</sub>), 7.43 (d,  $J = 2.2$  Hz, 1H, 8-CH<sub>isoqu</sub>), 7.55 (s, 1H, NH). <sup>13</sup>C NMR (CDCl<sub>3</sub>):  $\delta$  (ppm) = 21.7 (CH<sub>3</sub>tolyl), 24.6 (C-7), 29.4 (C-4<sub>isoqu</sub>), 30.0 (C-3<sub>pyran</sub>, C-5<sub>pyran</sub>), 31.1 (C-8, C-6), 47.0 (C-3<sub>isoqu</sub>), 52.5 (C-1<sub>isoqu</sub>), 60.7 (C-4<sub>pyran</sub>), 67.9 (C-2<sub>pyran</sub>, C-6<sub>pyran</sub>), 118.6 (C-8<sub>isoqu</sub>), 118.7 (C-6<sub>isoqu</sub>), 125.8 (C-2<sub>tolyl</sub>, C-6<sub>tolyl</sub>), 127.1 (C-3), 127.6 (C-4), 129.6 (C-5<sub>isoqu</sub>), 130.0 (C-3<sub>tolyl</sub>, C-5<sub>tolyl</sub>), 131.0 (C-1<sub>tolyl</sub>), 131.5 (C-4<sub>a</sub>isoqu), 133.9 (C-8<sub>a</sub>isoqu), 136.2 (C-4<sub>tolyl</sub>), 136.2 (C-2), 136.4 (C-5), 137.8 (C-3<sub>a</sub>), 140.5 (C-7<sub>isoqu</sub>), 143.7 (C-8<sub>a</sub>), 168.7 (O=C-NH). FT-IR (neat):  $\tilde{\nu}$  (cm<sup>-1</sup>) = 3290 (N-H), 2943 (C-H<sub>alkyl</sub>), 1627 (C=O).

***N*-{4-[*N*-Methyl-*N*-(tetrahydro-2*H*-pyran-4-yl)aminomethyl]phenyl}-2-(3-methylphenyl)-7,8-dihydro-6*H*-[7]annuleno[*b*]thiophene-5-carboxamide (**14d**)**

*N*-(4-Aminophenyl)-*N*-methyltetrahydro-2*H*-pyran-4-amin (78 mg, 0.35 mmol, 1 eq.) was added to a vigorously stirred mixture of acid **13b**<sup>40</sup> (100 mg, 0.35 mmol), triethylamine (71 mg, 0.70 mmol, 2 eq.) and HATU<sup>TM</sup> (150 mg, 0.38 mmol, 1.1 eq.) in THF (5 mL). The mixture was stirred overnight at rt. The mixture was concentrated *in vacuo* and the residue was purified by fc (EtOAc : CH<sub>2</sub>Cl<sub>2</sub> = 1:2 + 5% MeOH) and recrystallized from acetonitrile to give **14d** as a yellow solid.  $R_f = 0.17$  (EtOAc : CH<sub>2</sub>Cl<sub>2</sub> + 5 % MeOH = 1:2), mp 189 °C, yield 128 mg (74 %). C<sub>30</sub>H<sub>34</sub>N<sub>2</sub>O<sub>2</sub>S (486.6 g/mol). Purity (HPLC): 97 %,  $t_R = 20.94$  min. HRMS (APCI):  $m/z = \text{calcd. for C}_{30}\text{H}_{35}\text{N}_2\text{O}_2\text{S} [\text{MH}^+] 487.2414$ , found 487.2395. <sup>1</sup>H NMR (CDCl<sub>3</sub>):  $\delta$  (ppm) = 1.60-1.82 (m, 4H, 3-CH<sub>2</sub>pyran, 5-CH<sub>2</sub>pyran), 2.14 (quint,  $J = 6.2$  Hz, 2H, 7-CH<sub>2</sub>), 2.21 (s, 3H, N-CH<sub>3</sub>), 2.38 (s, 3H, CH<sub>3</sub>tolyl), 2.64 (tt,  $J = 11.2/4.0$  Hz, 1H, 4-H<sub>pyran</sub>), 2.84 (t,  $J = 5.5$  Hz, 2H, 6-CH<sub>2</sub>), 3.13 (t,  $J = 5.7$  Hz, 2H, 8-CH<sub>2</sub>), 3.37 (td,  $J = 11.5/2.3$  Hz, 2H, CH<sub>2</sub>axial-O-CH<sub>2</sub>axial), 3.57 (s, 2H, Ph-CH<sub>2</sub>-N), 4.04 (dd,  $J = 11.2/3.4$  Hz, 2H, CH<sub>2</sub>equat-O-CH<sub>2</sub>equat), 7.10 (d,  $J = 7.5$  Hz, 1H, 4-CH<sub>tolyl</sub>), 7.11 (s, 1H, 3-CH), 7.20 (s, 1H, 4-CH), 7.27-7.28 (m, 1H, 5-CH<sub>tolyl</sub>), 7.30 (d,  $J = 8.3$  Hz, 2H, 3-

$CH_{\text{phenyl}}$ , 5- $CH_{\text{phenyl}}$ ), 7.34 (m, 2H, 2- $CH_{\text{tolyl}}$ , 6- $CH_{\text{tolyl}}$ ), 7.48-7.57 (m, 3H, 2- $CH_{\text{phenyl}}$ , 6- $CH_{\text{phenyl}}$ , NH).  $^{13}\text{C}$  NMR ( $\text{CDCl}_3$ ):  $\delta$  (ppm) = 21.7 ( $CH_{3\text{tolyl}}$ ), 24.4 (C-7), 29.4 (C-3<sub>pyran</sub>, C-5<sub>pyran</sub>), 30.9 (C-8, C-6), 37.7 (N- $CH_3$ ), 57.5 (C-4<sub>pyran</sub>), 59.7 (Ph- $CH_2$ -N), 67.9 (C-2<sub>pyran</sub>, C-6<sub>pyran</sub>), 120.1 (C-2<sub>phenyl</sub>, C-6<sub>phenyl</sub>), 122.8 (C-2<sub>tolyl</sub>), 126.4 (C-6<sub>tolyl</sub>), 127.3 (C-3), 127.4 (C-4), 127.8 (C-1<sub>phenyl</sub>), 128.5 (C-4<sub>tolyl</sub>), 129.0 (C-5<sub>tolyl</sub>), 129.6 (C-3<sub>phenyl</sub>, C-5<sub>phenyl</sub>), 133.6 (C-3<sub>tolyl</sub>), 133.9 (C-1<sub>tolyl</sub>), 136.2 (C-2), 140.5 (C-3a), 144.7 (C-8a), 147.9 (C-5), 168.5 (O=C-NH). A signal for the carbon atom C-4<sub>phenyl</sub> is not visible. FT-IR (neat):  $\tilde{\nu}$  ( $\text{cm}^{-1}$ ) = 3305 (N-H), 2939, 2862 (C-H<sub>alkyl</sub>), 1643 (C=O), 1053, 1010 (C-O).

**2-(4-Butylphenyl)-N-[4-(piperidin-1-ylmethyl)phenyl]-7,8-dihydro-6H-[7]annuleno[b]thiophene-5-carboxamide (14g)**

1-(4-Aminobenzyl)piperidine dihydrochloride (79 mg, 0.30 mmol, 1 eq.) was added to a vigorously stirred mixture of acid **13c**<sup>40</sup> (100 mg, 0.30 mmol), triethylamine (61 mg, 0.60 mmol, 2 eq.) and HATU<sup>TM</sup> (130 mg, 0.33 mmol, 1.1 eq.) in acetonitrile (5 mL). The mixture was stirred overnight at rt. The mixture was stirred overnight at rt during which a precipitate was formed. The solid was filtered off, washed with acetonitrile and recrystallized from acetonitrile to give **14g** as a colorless solid.  $R_f$  = 0.11 ( $\text{CH}_2\text{Cl}_2$  : MeOH = 95:5), mp 185-188 °C, yield 132 mg (88 %).  $\text{C}_{32}\text{H}_{38}\text{N}_2\text{OS}$  (498.7 g/mol). Purity (HPLC): >97 %,  $t_R$  = 23.67 min. HRMS (APCI):  $m/z$  = calcd. for  $\text{C}_{32}\text{H}_{39}\text{N}_2\text{OS}$  [ $\text{MH}^+$ ] 499.2778, found 499.2803.  $^1\text{H}$  NMR ( $\text{CDCl}_3$ ):  $\delta$  (ppm) = 0.94 (t,  $J$  = 7.4 Hz, 3H, 4- $CH_{3n\text{-butyl}}$ ), 1.29-1.47 (m, 4H, 3- $CH_{2n\text{-butyl}}$ , 4- $CH_{2\text{piperidin}}$ ), 1.50-1.71 (m, 6H, 3- $CH_{2\text{piperidin}}$ , 5- $CH_{2\text{piperidin}}$ , 2- $CH_{2n\text{-butyl}}$ ), 2.13 (quint,  $J$  = 5.4 Hz, 2H, 7- $CH_2$ ), 2.36 (m, 4H, 2- $CH_{2\text{piperidin}}$ , 6- $CH_{2\text{piperidin}}$ ), 2.61 (t,  $J$  = 7.7 Hz, 2H, 1- $CH_{2n\text{-butyl}}$ ), 2.84 (t,  $J$  = 5.7 Hz, 2H, 6- $CH_2$ ), 3.11 (t,  $J$  = 5.7 Hz, 2H, 8- $CH_2$ ), 3.45 (s, 2H, Ph- $CH_2$ -N), 7.07 (s, 1H, 3-CH), 7.15-7.20 (m, 3H, 4-CH, 3- $CH_{\text{butylphen}}$ , 5- $CH_{\text{butylphen}}$ ), 7.29 (d,  $J$  = 8.5 Hz, 2H, 3- $CH_{\text{phenyl}}$ , 5- $CH_{\text{phenyl}}$ ), 7.43 (d,  $J$  = 8.2 Hz, 2H, 2- $CH_{\text{butylphen}}$ , 6- $CH_{\text{butylphen}}$ ), 7.52 (d,  $J$  = 8.5 Hz, 2H, 2- $CH_{\text{phenyl}}$ , 6- $CH_{\text{phenyl}}$ ), 7.54 (s, 1H, NH).  $^{13}\text{C}$  NMR ( $\text{CDCl}_3$ ):  $\delta$  (ppm) = 14.1 (C-4<sub>butyl</sub>), 22.5 (C-4<sub>piperidin</sub>), 24.3 (C-3<sub>butyl</sub>), 24.5 (C-7), 26.1 (C-3<sub>piperidin</sub>, C-5<sub>piperidin</sub>), 30.8 (C-8, C-6), 33.7 (C-2<sub>butyl</sub>), 35.5 (C-1<sub>butyl</sub>), 54.5 (C-2<sub>piperidin</sub>, C-6<sub>piperidin</sub>), 63.5 (Ph- $CH_2$ -N), 119.9 (C-2<sub>phenyl</sub>, C-6<sub>phenyl</sub>), 125.5 (C-3<sub>butylphen</sub>, C-5<sub>butylphen</sub>), 126.8 (C-2<sub>butylphen</sub>, C-6<sub>butylphen</sub>), 127.4 (C-3), 129.1 (C-4), 130.0 (C-3<sub>phenyl</sub>, C-5<sub>phenyl</sub>), 131.3 (C-1<sub>butylphen</sub>), 133.5 (C-4<sub>phenyl</sub>), 134.7 (C-1<sub>phenyl</sub>), 136.1 (C-2), 137.0 (C-3a), 140.5 (C-5), 142.6 (C-8a), 143.4 (C-4<sub>butylphen</sub>), 168.4 (O=C-NH). FT-IR (neat):  $\tilde{\nu}$  ( $\text{cm}^{-1}$ ) = 3325 (N-H), 2931 (C-H<sub>alkyl</sub>), 1643 (C=O), 1041, 1018 (C-O).

**2-(4-*tert*-Butylphenyl)-*N*-{4-[*N*-methyl-*N*-(tetrahydro-2*H*-pyran-4-yl)aminomethyl]phenyl}-7,8-dihydro-6*H*-[7]annuleno[*b*]thiophene-5-carboxamide (14h)**

*N*-(4-Aminophenyl)-*N*-methyltetrahydro-2*H*-pyran-4-amin (66 mg, 0.30 mmol, 1 eq.) was added to a vigorously stirred mixture of acid **13d**<sup>40</sup> (100 mg, 0.30 mmol), triethylamine (61 mg, 0.60 mmol, 2 eq.) and HATU™ (128 mg, 0.33 mmol, 1.1 eq.) in THF (5 mL). The mixture was stirred overnight at rt. The mixture was concentrated *in vacuo* and the residue was purified by fc (EtOAc : MeOH = 95:5) and recrystallized from acetonitrile to give **14h** as pale yellow solid. *R*<sub>f</sub> = 0.28 (MeOH : CH<sub>2</sub>Cl<sub>2</sub> = 5:95), mp 209 °C, yield 123 mg (77 %). C<sub>33</sub>H<sub>40</sub>N<sub>2</sub>O<sub>2</sub>S (528.7 g/mol). Purity (HPLC): 95 %, *t*<sub>R</sub> = 22.66 min. HRMS (APCI): *m/z* = calcd. for C<sub>33</sub>H<sub>41</sub>N<sub>2</sub>O<sub>2</sub>S [MH<sup>+</sup>] 529.2883, found 529.2927. <sup>1</sup>H NMR (CDCl<sub>3</sub>): δ (ppm) = 1.34 (s, 9H, C(CH<sub>3</sub>)<sub>3</sub>), 1.55-1.81 (m, 4H, 3-CH<sub>2</sub><sub>pyran</sub>, 5-CH<sub>2</sub><sub>pyran</sub>), 2.13 (quint., *J* = 5.3 Hz, 2H, 7-CH<sub>2</sub>), 2.20 (s, 3H, N-CH<sub>3</sub>), 2.64 (tt, *J* = 11.2/4.1 Hz, 1H, 4-H<sub>pyran</sub>), 2.83 (t, *J* = 5.7 Hz, 2H, 6-CH<sub>2</sub>), 3.11 (t, *J* = 5.7 Hz, 2H, 8-CH<sub>2</sub>), 3.37 (td, *J* = 11.6/2.3 Hz, 2H, CH<sub>2axial</sub>-O-CH<sub>2axial</sub>), 3.56 (s, 2H, Ph-CH<sub>2</sub>-N), 4.04 (dd, *J* = 11.3/4.9 Hz, 2H, CH<sub>2equat</sub>-O-CH<sub>2equat</sub>), 7.07 (s, 1H, 3-CH), 7.19 (s, 1H, 4-CH), 7.30 (d, *J* = 8.6 Hz, 2H, 3-CH<sub>phenyl</sub>, 5-CH<sub>phenyl</sub>), 7.39 (d, *J* = 8.3 Hz, 2H, 3-CH<sub>butylphen</sub>, 5-CH<sub>butylphen</sub>), 7.46 (d, *J* = 8.4 Hz, 2H, 2-CH<sub>butylphen</sub>, 6-CH<sub>butylphen</sub>), 7.53 (d, *J* = 8.5 Hz, 2H, 2-CH<sub>phenyl</sub>, 6-CH<sub>phenyl</sub>), 7.59 (s, 1H, NH). <sup>13</sup>C NMR (CDCl<sub>3</sub>): δ (ppm) = 24.6 (C-7), 29.7 (C-3<sub>pyran</sub>, C-5<sub>pyran</sub>), 31.1 (C-8), 31.1 (C-6), 31.7 (C(CH<sub>3</sub>)<sub>3</sub>), 35.0 (C(CH<sub>3</sub>)<sub>3</sub>), 38.0 (N-CH<sub>3</sub>), 57.8 (C-4<sub>pyran</sub>), 60.0 (Ph-CH<sub>2</sub>-N), 68.2 (C-2<sub>pyran</sub>, C-6<sub>pyran</sub>), 120.4 (C-2<sub>phenyl</sub>, C-6<sub>phenyl</sub>), 125.7 (C-3<sub>butylphen</sub>, C-5<sub>butylphen</sub>), 126.3 (C-2<sub>butylphen</sub>, C-6<sub>butylphen</sub>), 127.2 (C-3), 127.7 (C-4), 129.9 (C-3<sub>phenyl</sub>, C-5<sub>phenyl</sub>), 131.5 (C-1<sub>butylphen</sub>), 133.9 (C-4<sub>phenyl</sub>), 136.2 (C-1<sub>phenyl</sub>), 136.4 (C-2), 137.4 (C-3a), 140.7 (C-5), 143.8 (C-8a), 151.1 (C-4<sub>butylphen</sub>), 168.8 (O=C-NH). FT-IR (neat):  $\tilde{\nu}$  (cm<sup>-1</sup>) = 3251 (N-H), 2966 (C-H<sub>alkyl</sub>), 1651 (C=O), 1597 (C=C), 1053, 1014 (C-O).

### 3. Experimental Pharmacology

#### σ receptor assays

##### Materials

The guinea pig brains and rat liver for the σ<sub>1</sub> and σ<sub>2</sub> receptor binding assays were commercially available (Harlan-Winkelmann, Borcheln, Germany). Centrifuges: Cooling centrifuge model Rotina 35R (Hettich, Tuttlingen, Germany) and High-speed cooling centrifuge model Sorvall RC-5C plus (Thermo Fisher Scientific, Langenselbold, Germany). Multiplates: standard 96-well multiplates (Diagonal, Muenster, Germany).

Shaker: self-made device with adjustable temperature and tumbling speed (scientific workshop of the institute). Vortexer: Vortex Genie 2 (Thermo Fisher Scientific, Langenselbold, Germany). Harvester: MicroBeta FilterMate-96 Harvester. Filter: Printed Filtermat Typ A and B. Scintillator: Meltilex (Typ A or B) solid state scintillator. Scintillation analyzer: MicroBeta Trilux (all Perkin Elmer LAS, Rodgau-Jügesheim, Germany). Chemicals and reagents were purchased from different commercial sources and of analytical grade.

#### *Preparation of membrane homogenates from guinea pig brain*

5 guinea pig brains were homogenized with the potter (500-800 rpm, 10 up-and-down strokes) in 6 volumes of cold 0.32 M sucrose. The suspension was centrifuged at 1200 x *g* for 10 min at 4 °C. The supernatant was separated and centrifuged at 23,500 x *g* for 20 min at 4 °C. The pellet was resuspended in 5-6 volumes of buffer (50 mM TRIS, pH 7.4) and centrifuged again at 23,500 x *g* (20 min, 4 °C). This procedure was repeated twice. The final pellet was resuspended in 5-6 volumes of buffer and frozen (-80 °C) in 1.5 mL portions containing about 1.5 mg protein/mL.

#### *Preparation of membrane homogenates from rat liver*

Two rat livers were cut into small pieces and homogenized with the potter (500-800 rpm, 10 up-and-down strokes) in 6 volumes of cold 0.32 M sucrose. The suspension was centrifuged at 1,200 x *g* for 10 min at 4 °C. The supernatant was separated and centrifuged at 31,000 x *g* for 20 min at 4 °C. The pellet was resuspended in 5-6 volumes of buffer (50 mM TRIS, pH 8.0) and incubated at room temperature for 30 min. After the incubation, the suspension was centrifuged again at 31,000 x *g* for 20 min at 4 °C. The final pellet was resuspended in 5-6 volumes of buffer and stored at -80 °C in 1.5 mL portions containing about 2 mg protein/mL.

#### *Protein determination*

The protein concentration was determined by the method of Bradford,<sup>52</sup> modified by Stoscheck.<sup>53</sup> The Bradford solution was prepared by dissolving 5 mg of Coomassie Brilliant Blue G 250 in 2.5 mL of EtOH (95 %, v/v). 10 mL deionized water and 5 mL phosphoric acid (85%, m/v) were added to this solution, the mixture was stirred and filled to a total volume of 50.0 mL with deionized water. The calibration was carried out using bovine serum albumin as a standard in 9 concentrations (0.1, 0.2, 0.4, 0.6, 0.8,

1.0, 1.5, 2.0 and 4.0 mg /mL). In a 96 well standard multiplate, 10  $\mu$ L of the calibration solution or 10  $\mu$ L of the membrane receptor preparation were mixed with 190  $\mu$ L of the Bradford solution, respectively. After 5 min, the UV absorption of the protein-dye complex at  $\lambda = 595$  nm was measured with a platereader (Tecan Genios, Tecan, Crailsheim, Germany).

#### *General protocol for the binding assays*

The test compound solutions were prepared by dissolving approximately 10  $\mu$ mol (usually 2-4 mg) of test compound in DMSO so that a 10 mM stock solution was obtained. To obtain the required test solutions for the assay, the DMSO stock solution was diluted with the respective assay buffer. The filtermats were presoaked in 0.5% aqueous polyethylenimine solution for 2 h at room temperature before use. All binding experiments were carried out in duplicates in 96-well multiplates. The concentrations given are the final concentrations in the assay. Generally, the assays were performed by addition of 50  $\mu$ L of the respective assay buffer, 50  $\mu$ L test compound solution in various concentrations ( $10^{-5}$ ,  $10^{-6}$ ,  $10^{-7}$ ,  $10^{-8}$ ,  $10^{-9}$  and  $10^{-10}$  mol/L), 50  $\mu$ L of corresponding radioligand solution and 50  $\mu$ L of the respective receptor preparation into each well of the multiplate (total volume 200  $\mu$ L). The receptor preparation was always added last. During the incubation, the multiplates were shaken at a speed of 500-600 rpm at the specified temperature. Unless otherwise noted, the assays were terminated after 120 min by rapid filtration using the harvester. During the filtration each well was washed five times with 300  $\mu$ L of water. Subsequently, the filtermats were dried at 95 °C. The solid scintillator was melted on the dried filtermats at a temperature of 95 °C for 5 min. After solidifying of the scintillator at room temperature, the trapped radioactivity in the filtermats was measured with the scintillation analyzer. Each position on the filtermat corresponding to one well of the multiplate was measured for 5 min with the [ $^3$ H]-counting protocol. The overall counting efficiency was 20%. The  $IC_{50}$  values were calculated with the program GraphPad Prism® 3.0 (GraphPad Software, San Diego, CA, USA) by non-linear regression analysis. Subsequently, the  $IC_{50}$  values were transformed into  $K_i$  values using the equation of Cheng and Prusoff.

#### *Protocol for the determination of $\sigma_1$ affinity*

The assay was performed with the radioligand [ $^3$ H](+)-Pentazocine (0.81 GBq/ $\mu$ mol (22.0 Ci/mmol); Perkin Elmer). The thawed membrane preparation of guinea pig brain

cortex (about 100 µg of protein) was incubated with various concentrations of test compounds, 2 nM [<sup>3</sup>H](+)-Pentazocine, and TRIS buffer (50 mM, pH 7.4) at 37 °C. The non-specific binding was determined with 10 µM unlabeled (+)-Pentazocine. The  $K_d$  value of (+)-pentazocine is 2.9 nM.<sup>54</sup> The nonspecific binding was determined in the presence of a large excess of non-tritiated (+)-pentazocine.  $K_i$  values of the reference compounds (+)-pentazocine, ditolylguanidine (DTG), haloperidol and rimcazol were determined and compared with literature data to verify the *in-vitro* assay.

|                                           | (+)-pentazocine           | ditolylguanidine       | haloperidol               | rimcazole                 |
|-------------------------------------------|---------------------------|------------------------|---------------------------|---------------------------|
| $K_i \pm \text{SEM [nM]}$<br>/literature) | $2.1 \pm 0.1^{54}$        | $107 \pm 21^{55}$      | $1.8 \pm 0.09^{55}$       | $2380 \pm 812^{56}$       |
| $K_i \pm \text{SEM [nM]}$<br>(recorded)   | $5.4 \pm 0.5$<br>(n = 17) | $71 \pm 8$<br>(n = 15) | $6.6 \pm 0.9$<br>(n = 14) | $1746 \pm 609$<br>(n = 6) |

$\sigma_1$  Affinities of reference compounds (literature and own data).

#### *Protocol for the determination of $\sigma_2$ affinity*

The assays were performed with the radioligand [<sup>3</sup>H]DTG (specific activity 1.85 GBq/µmol (50 Ci/mmol); ARC, St. Louis, MO, USA). The thawed membrane preparation of rat liver (about 100 µg of protein) was incubated with various concentrations of the test compound, 3 nM [<sup>3</sup>H]DTG and buffer containing (+)-pentazocine (500 nM (+)-pentazocine in 50 mM TRIS, pH 8.0) at room temperature. The non-specific binding was determined with 10 µM non-labeled DTG. The  $K_d$  value of [<sup>3</sup>H]DTG is 17.9 nM.<sup>55</sup> Excess of unlabeled DTG (D) was used to determine the nonspecific binding.  $K_i$  values of reference compounds haloperidol, ditolylguanidine (DTG), ifenprodil and rimcazol were determined and compared with literature data to verify the *in vitro* assay.

|                                           | haloperidol             | ditolylguanidine       | ifenprodil             |
|-------------------------------------------|-------------------------|------------------------|------------------------|
| $K_i \pm \text{SEM [nM]}$<br>(literature) | $22 \pm 8.5^{55}$       | $40 \pm 2.6^{57}$      | $6.25 \pm 0.38^{58}$   |
| $K_i \pm \text{SEM [nM]}$<br>(recorded)   | $125 \pm 33$<br>(n = 7) | $54 \pm 8$<br>(n = 15) | $60 \pm 16$<br>(n = 5) |

$\sigma_2$  Affinities of reference compounds (literature and own data).

#### 4. $^1\text{H}$ and $^{13}\text{C}$ and gHSQC NMR spectra, HPLC analysis and MS spectra

##### *2-(4-Methylphenyl)-6,7-dihydro-5H-benzo[7]annulene-8-carboxylic acid*<sup>37</sup> (**6**)

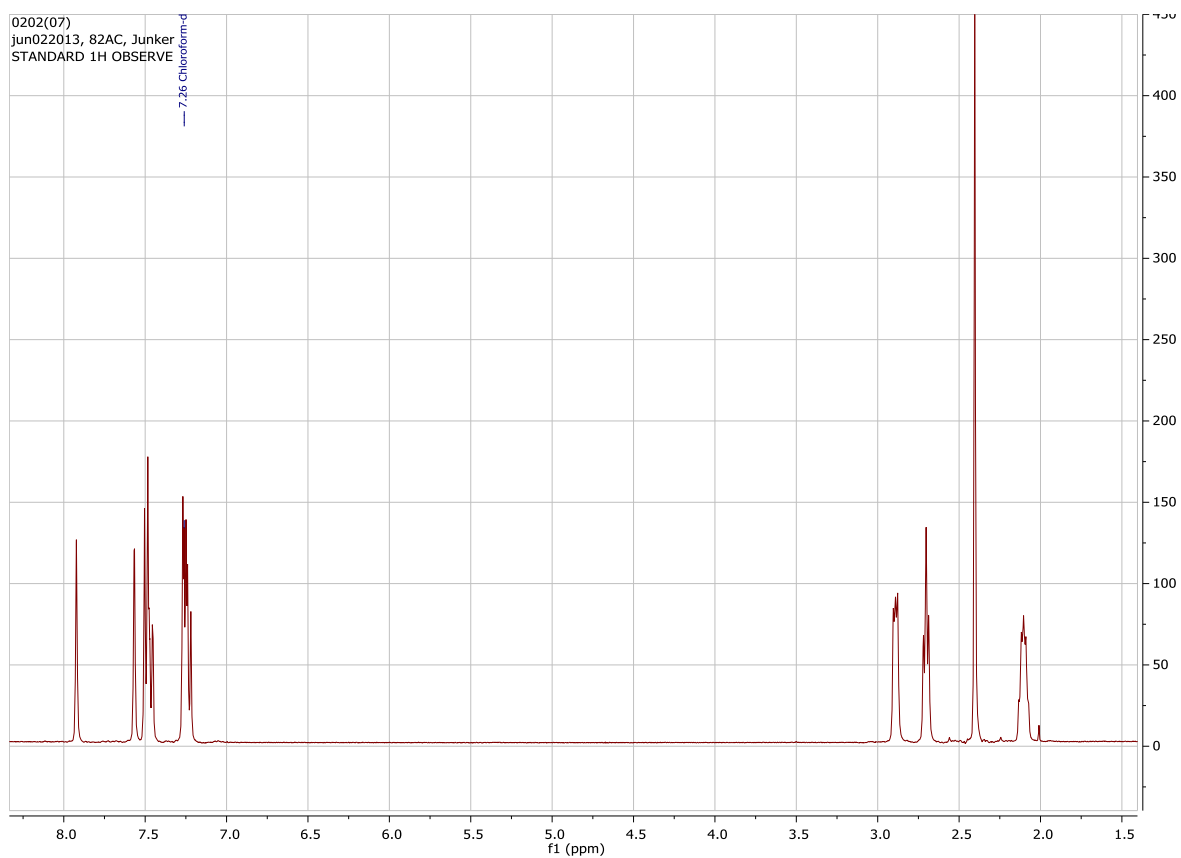



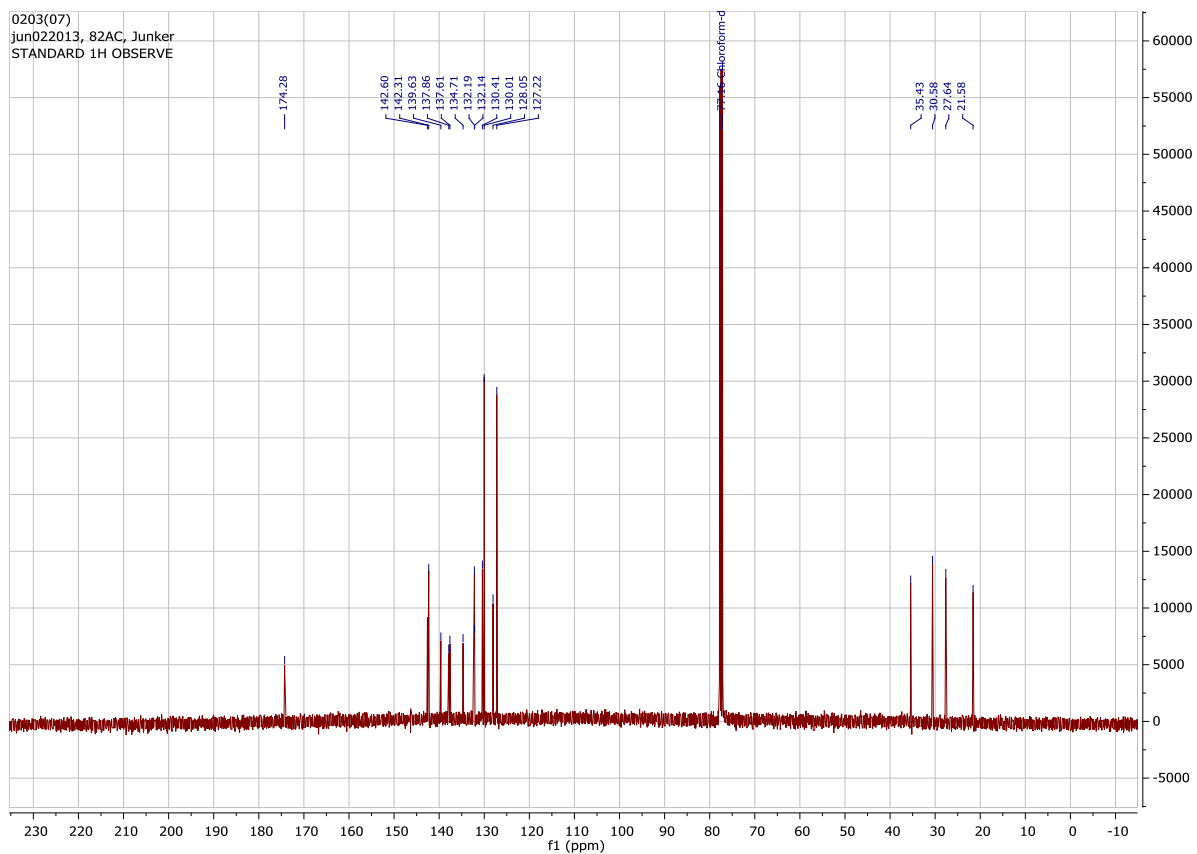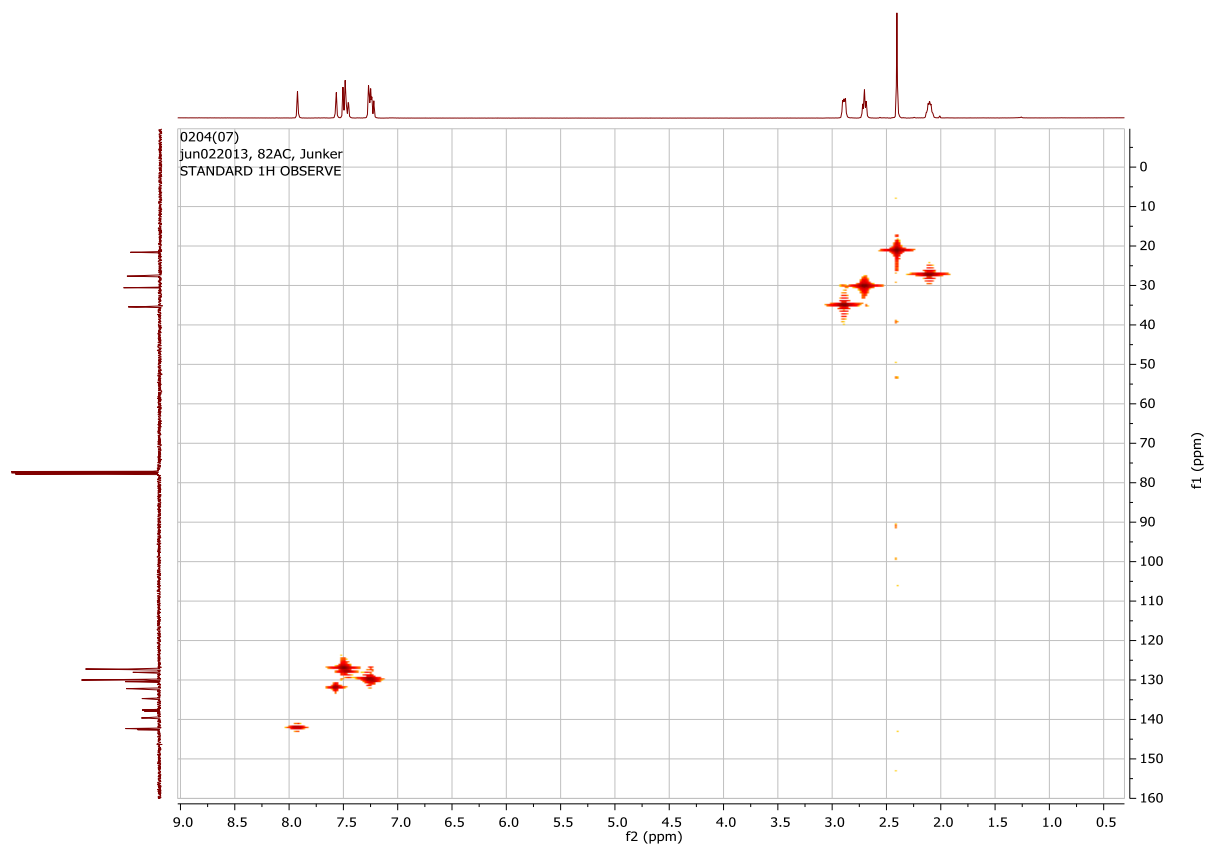

# HPLC

Analyzed: 23.08.12 02:36

Reported: 24.08.12 11:19  
Processed: 24.08.12 11:19

Data Path: D:\WIN32APP\HSM\Chromni\DATA\5121\

Application: Chromni

Sample Name: *AJ82 acid*

Injection from this vial: 1 of 1

Series: 5121

Vial Number: 13

Vial Type: UNK

Volume: 5,0 ul

Chrom Type: HPLC Channel : 1

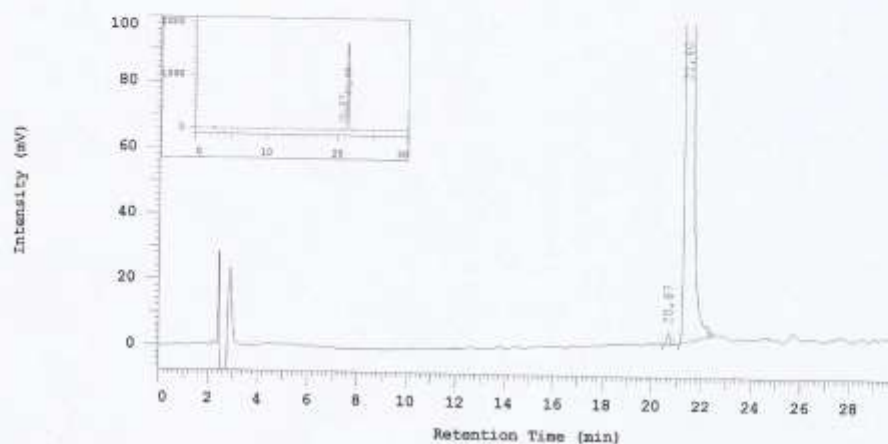

Acquisition Method: Chromni

Blank Subtr Sample Name: ACN

Column Type: 010

Solvent A: Wasser + 0,05%TFA

Developed by: Jens

Solvent B: ACN + 0,05%TFA

| No. | RT    | Area     | Conc 1  | BC |
|-----|-------|----------|---------|----|
| 1   | 20,67 | 31355    | 0,198   | BB |
| 2   | 21,40 | 15789129 | 99,802  | BB |
|     |       | 15820484 | 100,000 |    |

Peak rejection level: 0

## Generic Display Report

## Analysis Info

Analysis Name D:\Data\PMC\PharmChemie\Routine\APCI\12\_08\WJU\_AJ82acid\_2.d  
Method APCI\_directprobe\_positiv.m  
Sample Name AJ82acid  
Comment Junker  
APCI-Direkt  
Kalibration mit Fettsaeureestern

Acquisition Date 8/28/2012 1:31:16 PM

Operator

Meiners

Instrument micrOTOF-Q II

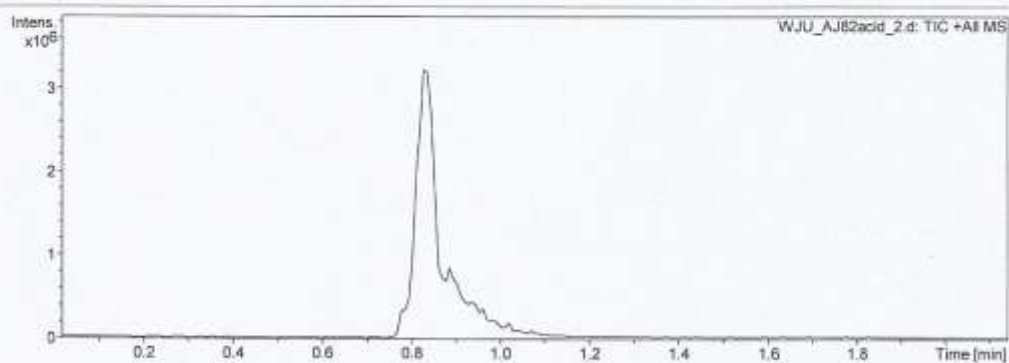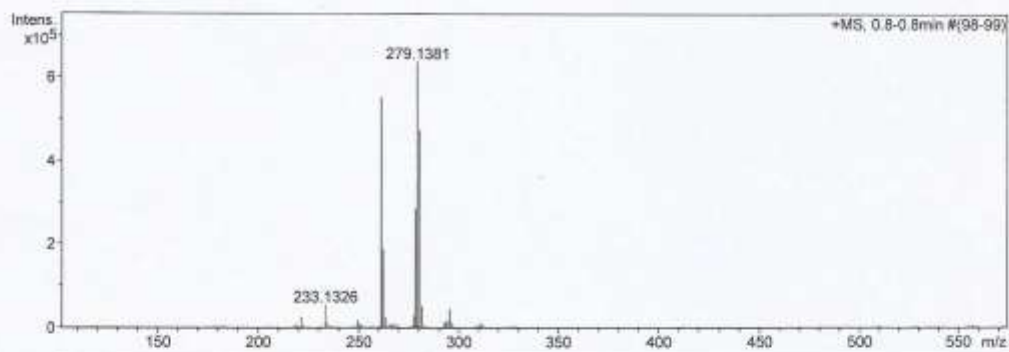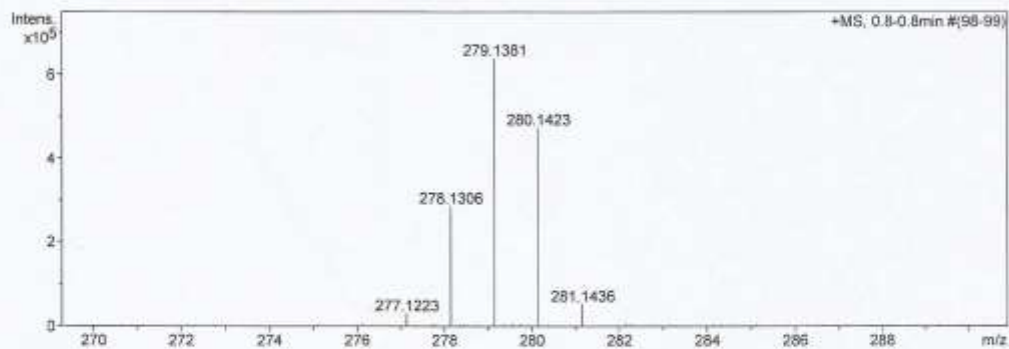

# Mass Spectrum SmartFormula Report

## Analysis Info

Analysis Name D:\Data\IPMC\PharmChemie\Routine\APCI\12\_08\WJU\_AJ82acid\_2.d  
 Method APCI\_directprobe\_positiv.m  
 Sample Name AJ82acid  
 Comment Junker  
 APCI-Direkt  
 Kalibration mit Fettsaeureestern

Acquisition Date 8/28/2012 1:31:16 PM

Operator Meiners

Instrument / Ser# micrOTOF-Q II 10252

## Acquisition Parameter

Source Type APCI Ion Polarity Positive  
 Focus Not active Set Capillary 4000 V Set Nebulizer 0.7 Bar  
 Scan Begin 100 m/z Set End Plate Offset -500 V Set Dry Heater 200 °C  
 Scan End 1000 m/z Set Collision Cell RF 130.0 Vpp Set Dry Gas 3.0 l/min  
 Set Divert Valve Waste

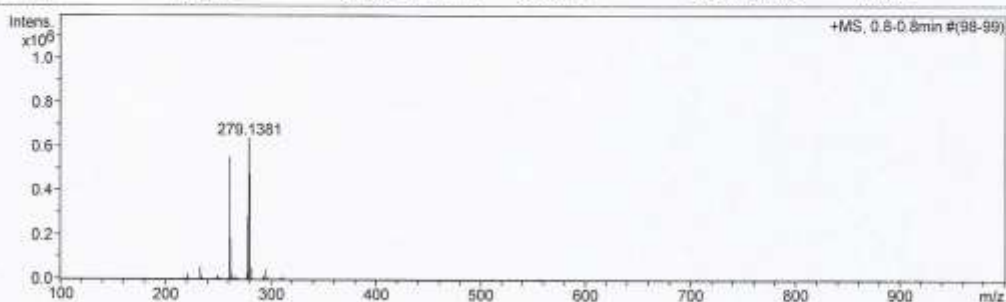

| Meas. m/z | # | Formula           | Score  | m/z      | err [mDa] | err [ppm] | mSigma | rdB  | e <sup>-</sup> Conf | N-Rule |
|-----------|---|-------------------|--------|----------|-----------|-----------|--------|------|---------------------|--------|
| 279.1381  | 1 | C 19 H 19 O 2     | 100.00 | 279.1380 | -0.2      | -0.7      | 310.5  | 10.5 | even                | ok     |
|           | 2 | C 15 H 15 N 6     | 3.16   | 279.1353 | -2.9      | -10.3     | 323.2  | 11.5 | even                | ok     |
|           | 3 | C 14 H 19 N 2 O 4 | 0.11   | 279.1339 | -4.2      | -15.1     | 337.6  | 6.5  | even                | ok     |
|           | 4 | C 13 H 19 N 4 O 3 | 0.00   | 279.1452 | 7.0       | 25.1      | 339.7  | 6.5  | even                | ok     |
|           | 5 | C 10 H 15 N 8 O 2 | 0.00   | 279.1312 | -6.9      | -24.7     | 350.2  | 7.5  | even                | ok     |
|           | 6 | C 9 H 15 N 10 O   | 0.01   | 279.1425 | 4.3       | 15.5      | 352.5  | 7.5  | even                | ok     |
|           | 7 | C 12 H 23 O 7     | 0.00   | 279.1438 | 5.7       | 20.4      | 354.2  | 1.5  | even                | ok     |
|           | 8 | C 8 H 19 N 6 O 5  | 0.01   | 279.1411 | 3.0       | 10.7      | 366.9  | 2.5  | even                | ok     |

2-(4-Methyphenyl)-N-{4-[N-methyl-N-(tetrahydro-2H-pyran-4-yl)aminomethyl]phenyl}-  
6,7-dihydro-5H-benzo[7]annulene-8-carboxamide<sup>39</sup> (**8a**)

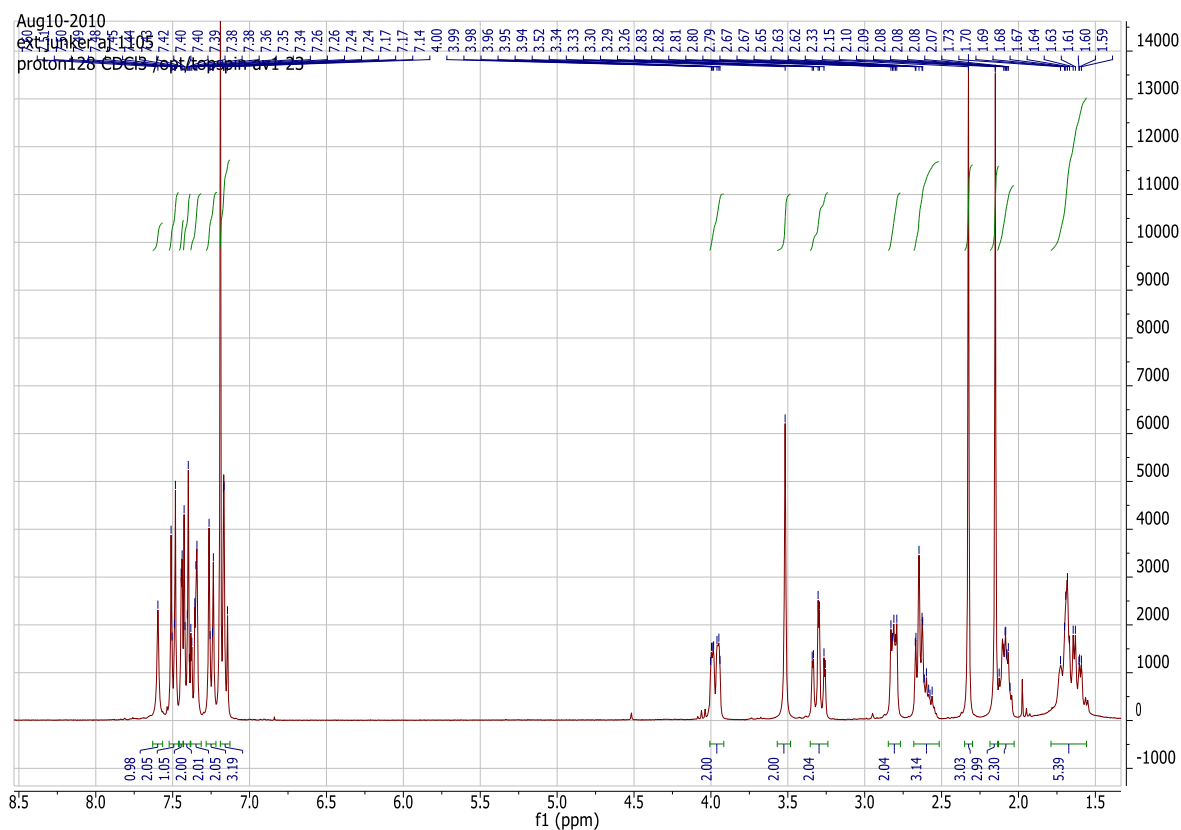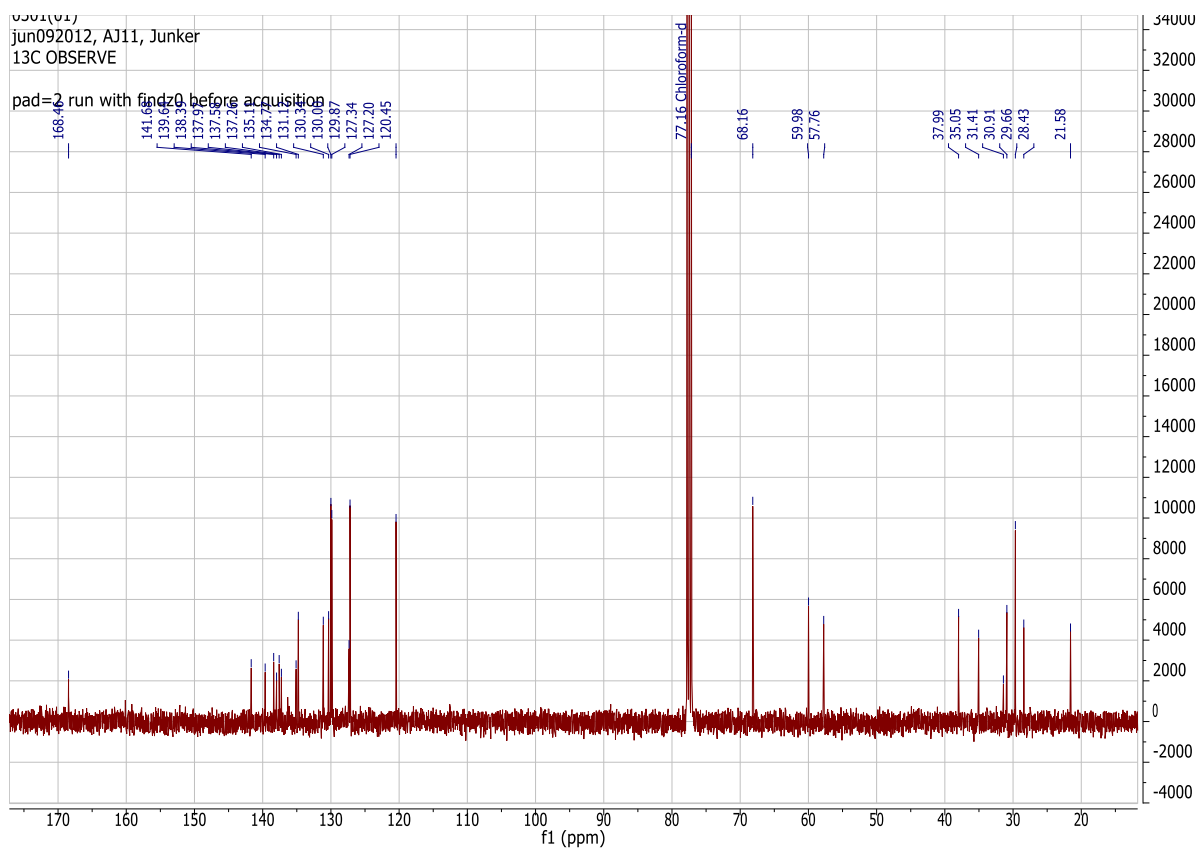

# HPLC

Analyzed: 27.10.10 21:41

Reported: 28.10.10 16:22

Processed: 28.10.10 16:22

Data Path: D:\WIN32APP\HSM\Chromni\DATA\2304\

Application: Chromni

Series: 2304

**Sample Name: AJ1106**

Vial Number: 6

Injection from this vial: 1 of 1

Vial Type: UNK

Volume: 5,0 ul

Chrom Type: HPLC Channel : 1

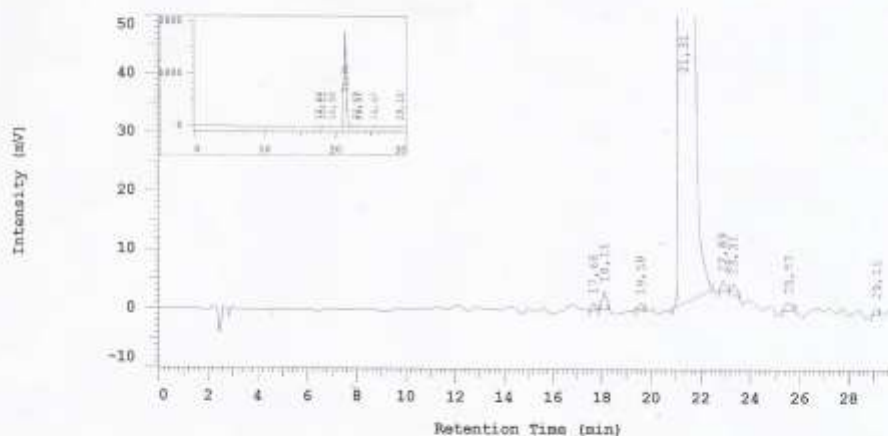

Acquisition Method: Chromni

Blank Subtr Sample Name: ACN

Column Type: 010

Solvent A: Wasser + 0,05%TFA

Developed by: Jens

Solvent B: ACN + 0,05%TFA

| No. | RT    | Area     | Conc 1  | BC |
|-----|-------|----------|---------|----|
| 1   | 17,66 | 13404    | 0,039   | BB |
| 2   | 18,11 | 36545    | 0,108   | BB |
| 3   | 19,58 | 11382    | 0,033   | BB |
| 4   | 21,31 | 33844163 | 99,601  | MC |
| 5   | 22,89 | 19358    | 0,057   | MC |
| 6   | 23,31 | 20396    | 0,060   | MC |
| 7   | 25,57 | 22792    | 0,067   | BB |
| 8   | 29,15 | 11760    | 0,035   | BB |
|     |       | 33979800 | 100,000 |    |

Peak rejection level: 0

## Generic Display Report

## Analysis Info

Analysis Name E:\Meiners\12\_09\WJU\_AJ11.d  
Method APCI\_directprobe\_positiv.m  
Sample Name AJ11  
Comment Junker  
APCI-Direkt  
Kalibration mit Fettsäureestern

Acquisition Date 9/4/2012 11:44:15 AM

Operator Sendker  
Instrument micrOTOF-Q II

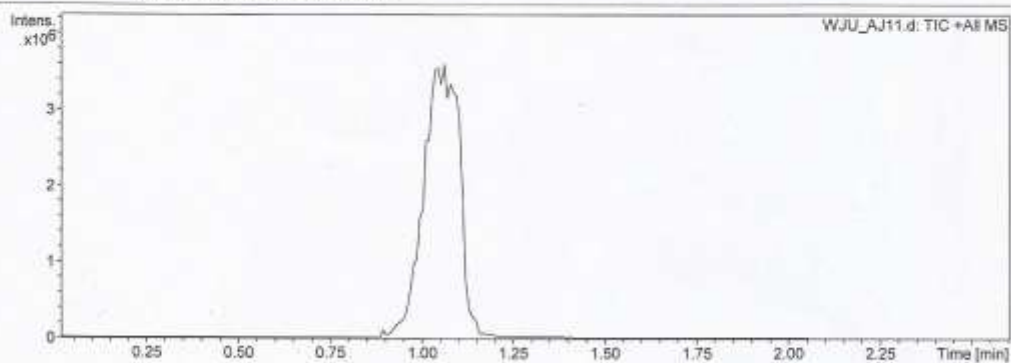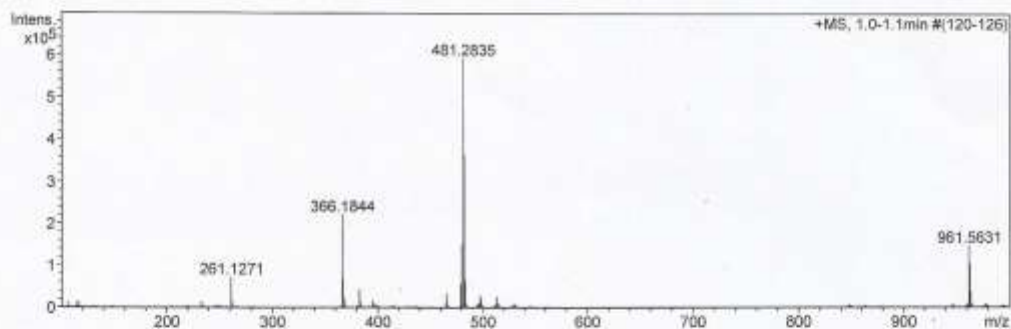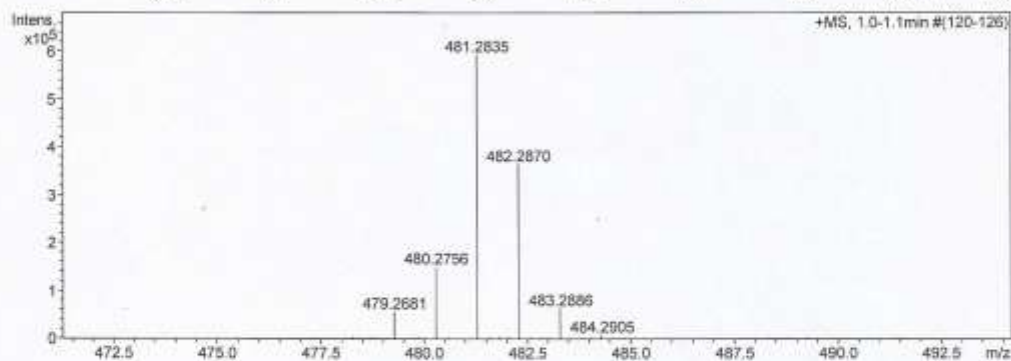

# Mass Spectrum SmartFormula Report

## Analysis Info

Analysis Name E:\Meiners\12\_09\WJU\_AJ11.d  
 Method APCI\_directprobe\_positiv.m  
 Sample Name AJ11  
 Comment Junker  
 APCI-Direkt  
 Kalibration mit Fettsaeureestern

Acquisition Date 9/4/2012 11:44:15 AM

Operator Sendker  
 Instrument / Ser# microTOF-Q II 10252

## Acquisition Parameter

|             |            |                       |           |                  |           |
|-------------|------------|-----------------------|-----------|------------------|-----------|
| Source Type | APCI       | Ion Polarity          | Positive  | Set Nebulizer    | 0.7 Bar   |
| Focus       | Not active | Set Capillary         | 4000 V    | Set Dry Heater   | 200 °C    |
| Scan Begin  | 100 m/z    | Set End Plate Offset  | -500 V    | Set Dry Gas      | 3.0 l/min |
| Scan End    | 1000 m/z   | Set Collision Cell RF | 130.0 Vpp | Set Divert Valve | Waste     |

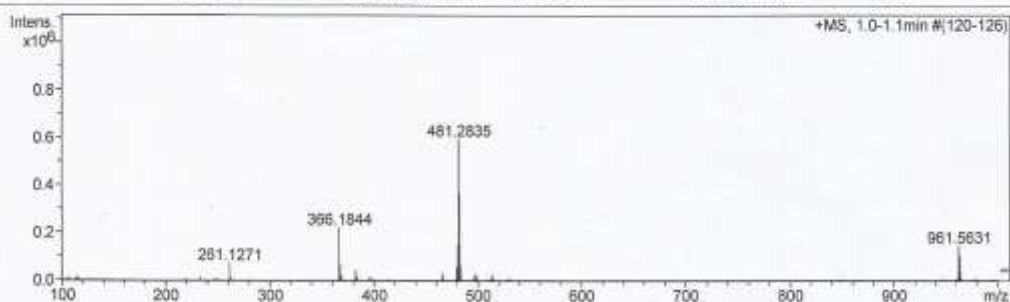

| Meas. m/z | #  | Formula                                                        | Score  | m/z      | err [mDa] | err [ppm] | mSigma | rdb  | e <sup>-</sup> Conf | N-Rule |
|-----------|----|----------------------------------------------------------------|--------|----------|-----------|-----------|--------|------|---------------------|--------|
| 481.2835  | 1  | C <sub>32</sub> H <sub>37</sub> N <sub>2</sub> O <sub>2</sub>  | 100.00 | 481.2850 | 1.5       | 3.1       | 128.7  | 15.5 | even                | ok     |
|           | 2  | C <sub>28</sub> H <sub>33</sub> N <sub>8</sub>                 | 59.81  | 481.2823 | -1.2      | -2.5      | 140.4  | 16.5 | even                | ok     |
|           | 3  | C <sub>27</sub> H <sub>37</sub> N <sub>4</sub> O <sub>4</sub>  | 10.10  | 481.2808 | -2.5      | -5.3      | 152.7  | 11.5 | even                | ok     |
|           | 4  | C <sub>26</sub> H <sub>41</sub> O <sub>8</sub>                 | 1.11   | 481.2798 | -3.9      | -8.0      | 165.0  | 6.5  | even                | ok     |
|           | 5  | C <sub>20</sub> H <sub>41</sub> N <sub>4</sub> O <sub>9</sub>  | 0.29   | 481.2868 | 3.3       | 6.9       | 190.6  | 2.5  | even                | ok     |
|           | 6  | C <sub>21</sub> H <sub>37</sub> N <sub>8</sub> O <sub>5</sub>  | 0.02   | 481.2881 | 4.7       | 9.7       | 206.0  | 7.5  | even                | ok     |
|           | 7  | C <sub>17</sub> H <sub>33</sub> N <sub>14</sub> O <sub>3</sub> | 0.08   | 481.2855 | 2.0       | 4.1       | 219.3  | 8.5  | even                | ok     |
|           | 8  | C <sub>16</sub> H <sub>37</sub> N <sub>10</sub> O <sub>7</sub> | 0.05   | 481.2841 | 0.7       | 1.4       | 233.3  | 3.5  | even                | ok     |
|           | 9  | C <sub>13</sub> H <sub>29</sub> N <sub>20</sub> O              | 0.04   | 481.2828 | -0.7      | -1.4      | 234.9  | 9.5  | even                | ok     |
|           | 10 | C <sub>12</sub> H <sub>33</sub> N <sub>16</sub> O <sub>5</sub> | 0.01   | 481.2814 | -2.0      | -4.2      | 246.5  | 4.5  | even                | ok     |



*N*-[4-Diethylamino]phenyl]-2-(4-methylphenyl)-6,7-dihydro-5H-benzo[7]annulene-8-carboxamide (**8b**)

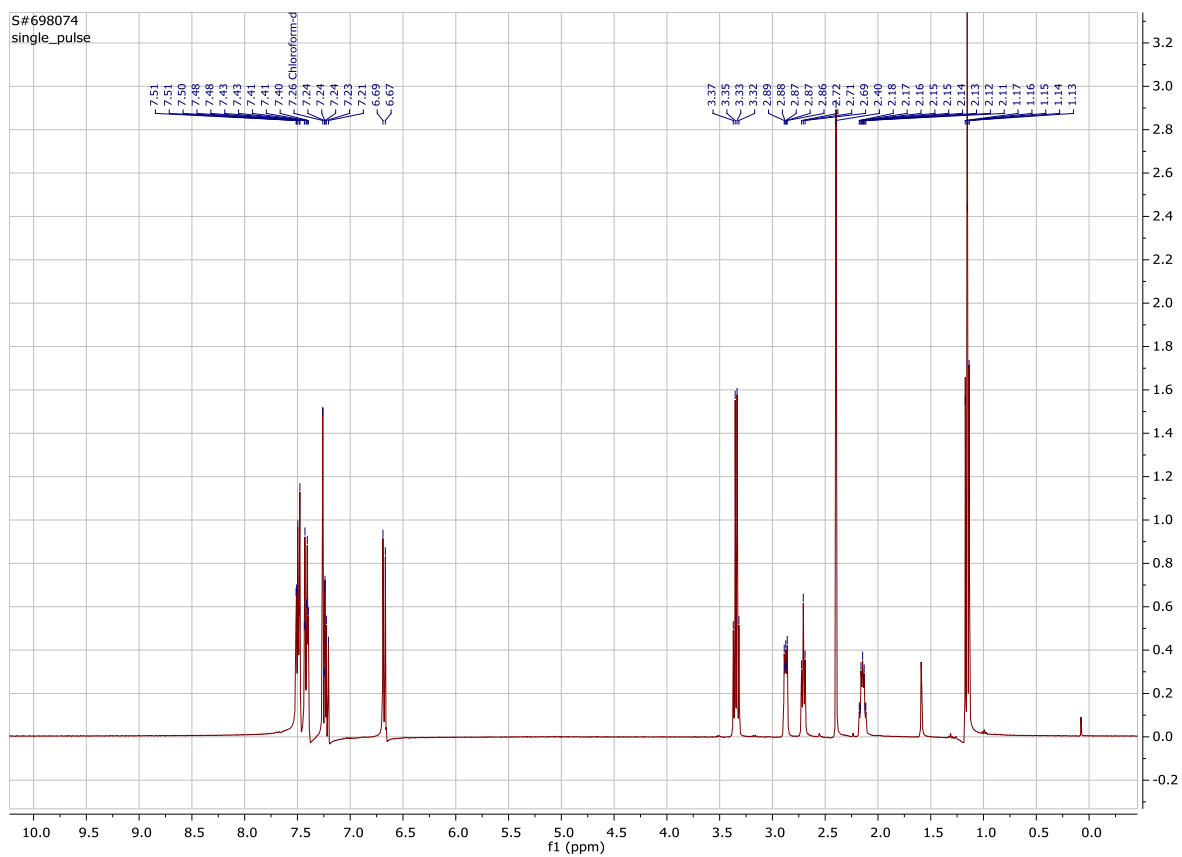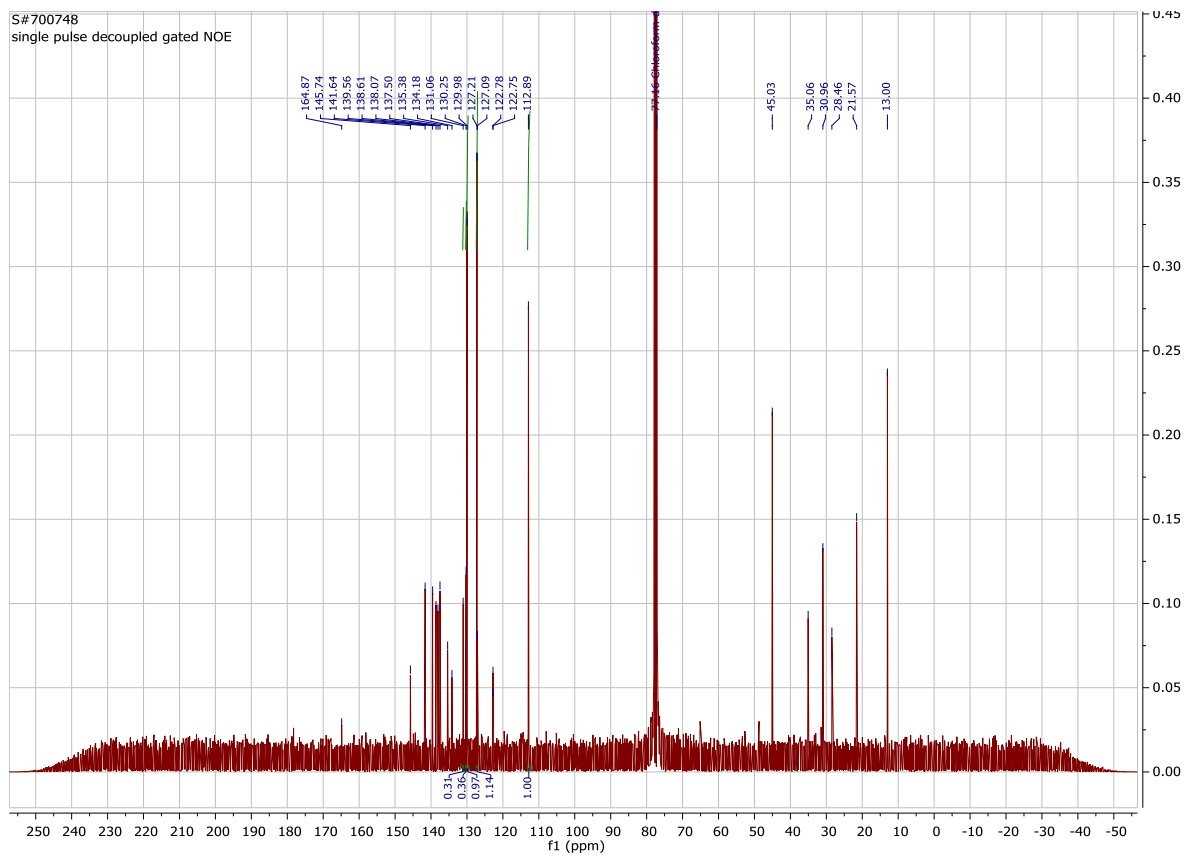

# HPLC

Analyzed: 01.08.12 22:37

Reported: 02.08.12 14:55

Processed: 02.08.12 14:55

Data Path: D:\WIN32APP\HSM\Chromni\DATA\5043\

Application: Chromni

Series:5043

**Sample Name: AJ452**

Vial Number: 7

Injection from this vial: 1 of 1

Vial Type: UNK

Volume: 5,0 ul

Chrom Type: HPLC Channel : 1

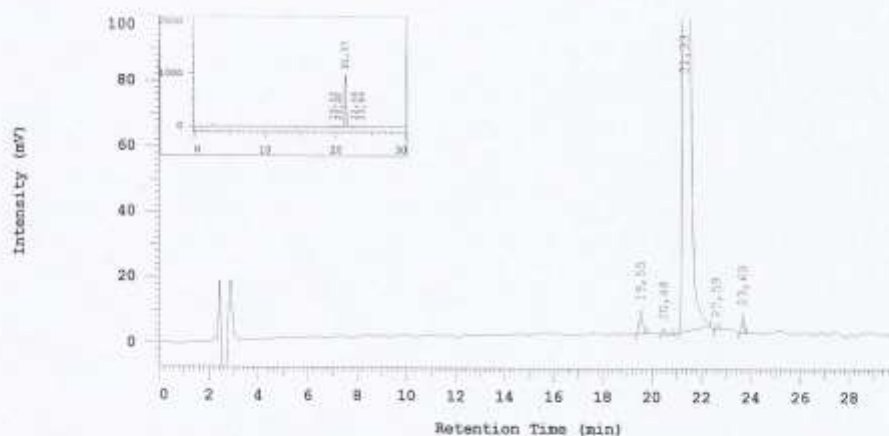

Acquisition Method: Chromni

Blank Subtr Sample Name: ACN

Column Type: 010

Solvent A: Wasser + 0,05%TFA

Developed by: Jens

Solvent B: ACN + 0,05%TFA

| No. | RT    | Area     | Conc 1  | BC |
|-----|-------|----------|---------|----|
| 1   | 19,55 | 64778    | 0,532   | BB |
| 2   | 20,48 | 22029    | 0,181   | BB |
| 3   | 21,33 | 12052269 | 98,927  | MC |
| 4   | 22,59 | 7661     | 0,063   | BB |
| 5   | 23,69 | 36226    | 0,297   | BB |
|     |       | 12182963 | 100,000 |    |

Peak rejection level: 0

## Generic Display Report

## Analysis Info

Analysis Name D:\Data\IPMC\PharmChemie\Routine\LC-MS\2012\_09\_10\AJ452\_BA6\_01\_8155.d  
Method tune\_low\_lcms\_routine\_positiv\_10min.m  
Sample Name AJ452  
Comment Junker  
LCMS\_EI+  
Kalibration mit Li-Formate

Acquisition Date 9/10/2012 2:18:35 PM

Operator Sendker

Instrument microTOF-Q II

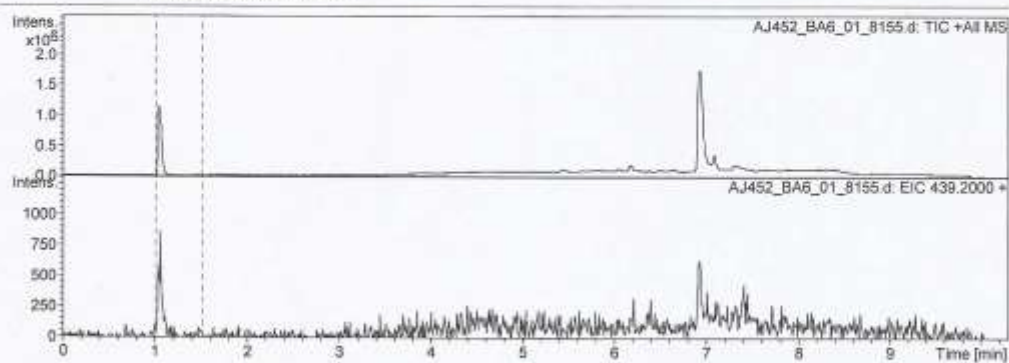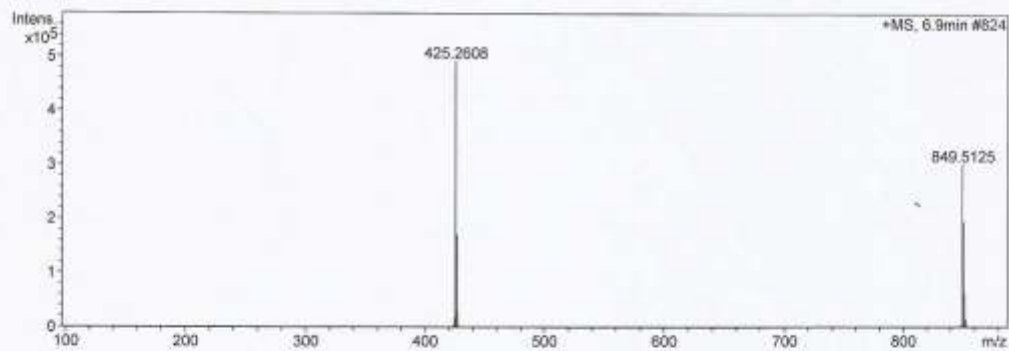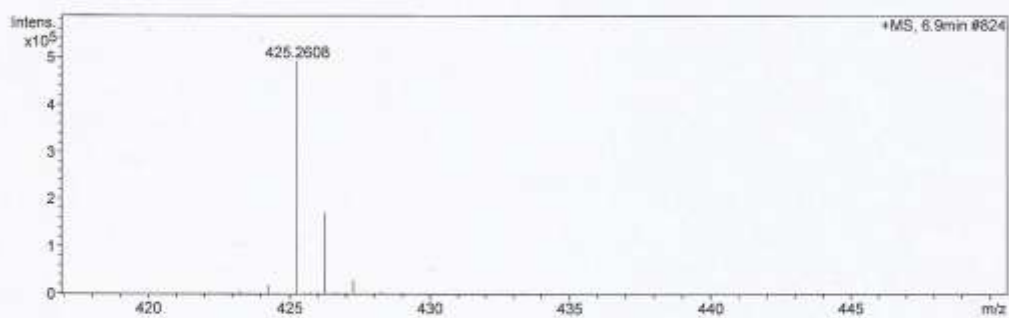

# Mass Spectrum SmartFormula Report

## Analysis Info

Analysis Name D:\Data\PMC\PharmChemie\Routine\LC-MS\2012\_09\_10\AJ452\_BA6\_01\_8155.d  
Method tune\_low\_lcms\_routine\_positiv\_10min.m  
Sample Name AJ452  
Comment Junker  
LCMS\_EI+  
Kalibration mit Li-Formate

Acquisition Date 9/10/2012 2:18:35 PM

Operator Sendker

Instrument / Ser# micrOTOF-Q II 10252

## Acquisition Parameter

|             |            |                       |           |                  |           |
|-------------|------------|-----------------------|-----------|------------------|-----------|
| Source Type | ESI        | Ion Polarity          | Positive  | Set Nebulizer    | 2.0 Bar   |
| Focus       | Not active | Set Capillary         | 4500 V    | Set Dry Heater   | 200 °C    |
| Scan Begin  | 100 m/z    | Set End Plate Offset  | -500 V    | Set Dry Gas      | 9.0 l/min |
| Scan End    | 1000 m/z   | Set Collision Cell RF | 300.0 Vpp | Set Divert Valve | Waste     |

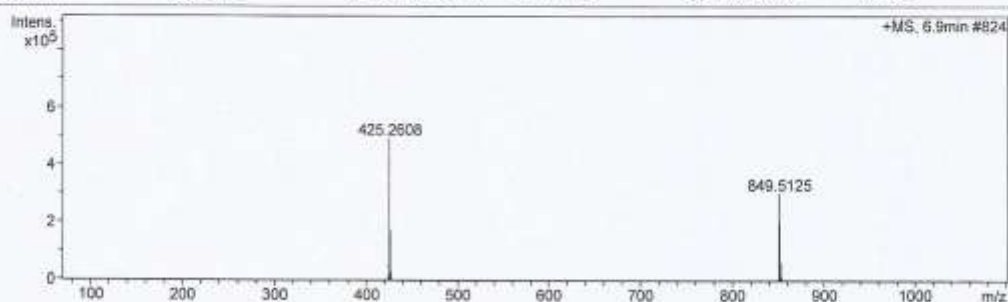

| Meas. m/z | # | Formula                                          | Score  | m/z      | err [mDa] | err [ppm] | mSigma | rdB  | e <sup>-</sup> Conf | N-Rule |
|-----------|---|--------------------------------------------------|--------|----------|-----------|-----------|--------|------|---------------------|--------|
| 425.2608  | 1 | C <sub>29</sub> H <sub>33</sub> N <sub>2</sub> O | 100.00 | 425.2587 | -2.1      | -4.9      | 10.7   | 14.5 | even                | ok     |

2-(4-Methylphenyl)-N-{4-[4-(tetrahydro-2H-pyran-4-yl)piperazin-1-yl]phenyl}-6,7-dihydro-5H-benzo[7]annulene-8-carboxamide (**8c**)

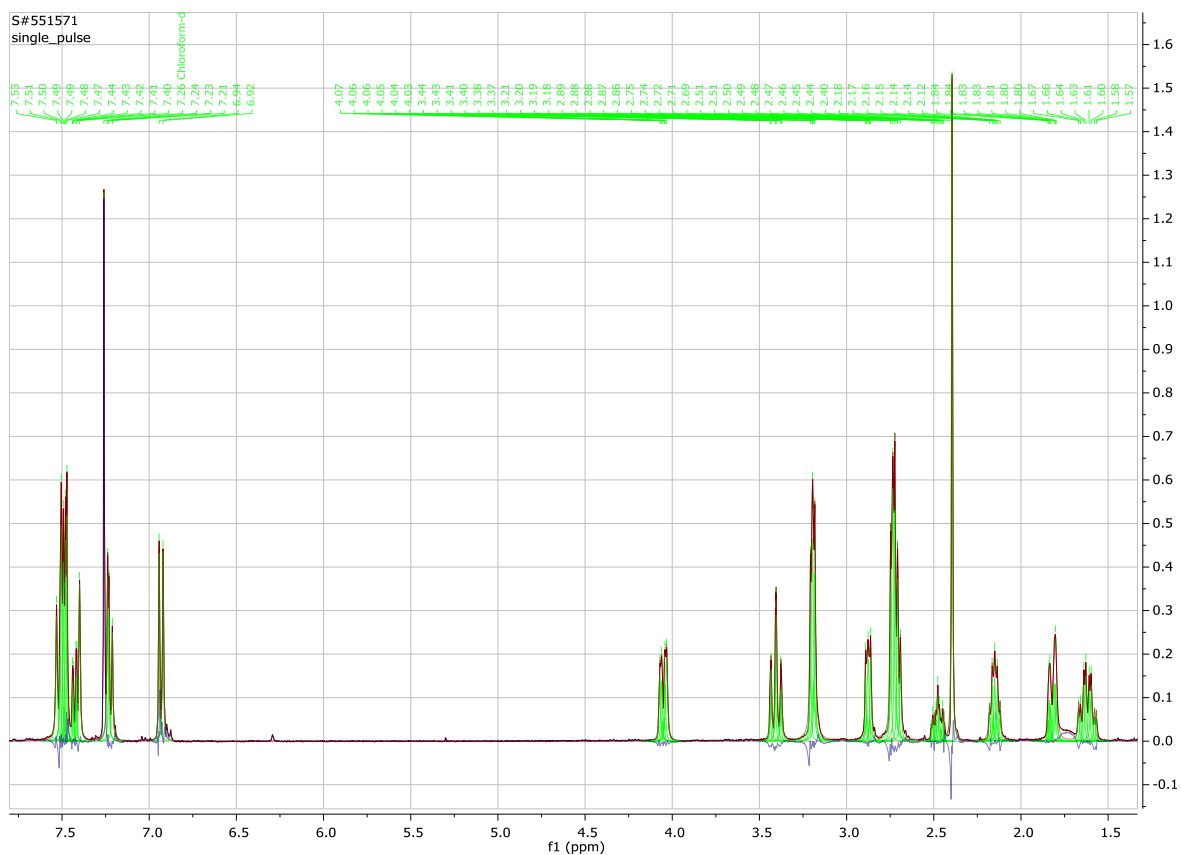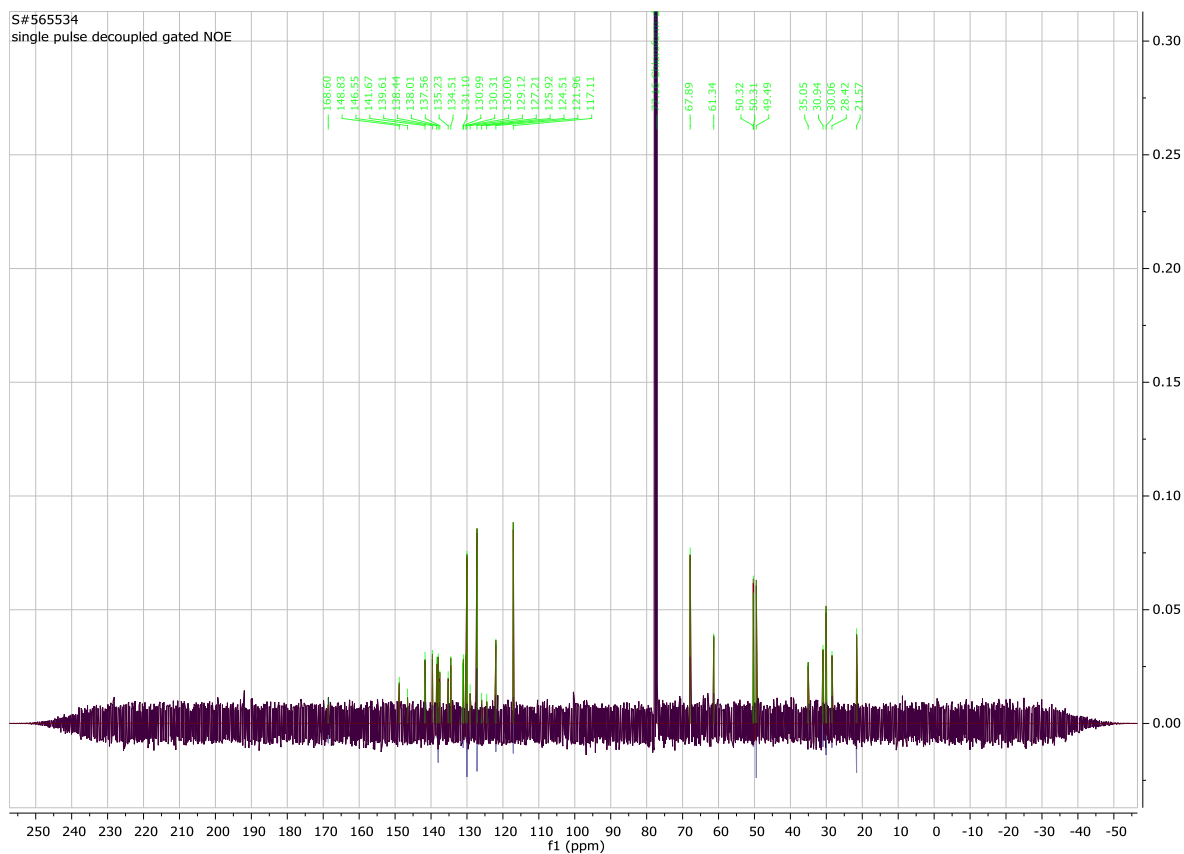

# HPLC

Analyzed: 02.08.12 04:09

Reported: 02.08.12 15:02  
Processed: 02.08.12 15:02

Data Path: D:\WIN32APP\HSM\Chromni\DATA\5051\

Application: Chromni

Sample Name: AJ42201

Injection from this vial: 1 of 1

Series: 5051

Vial Number: 13

Vial Type: UNK

Volume: 5,0 ul

Chrom Type: HPLC Channel : 1

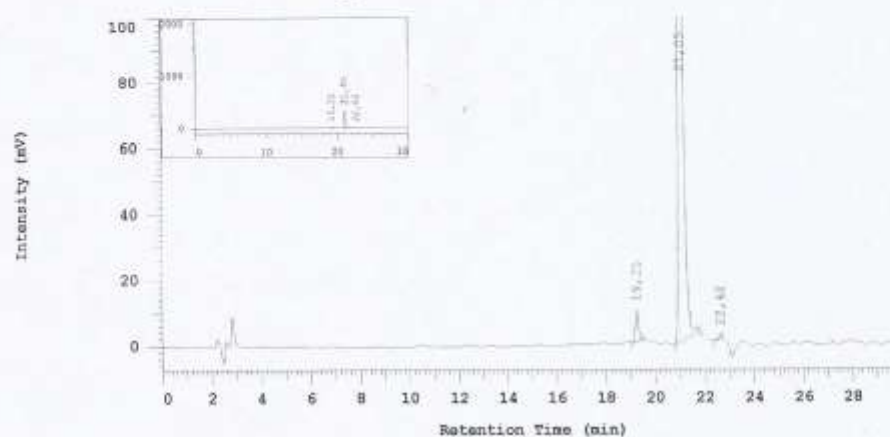

Acquisition Method: Chromni

Blank Subtr Sample Name: ACN

Column Type: 010

Solvent A: Wasser + 0,05%TFA

Developed by: Jens

Solvent B: ACN + 0,05%TFA

| No. | RT    | Area    | Conc 1  | BC |
|-----|-------|---------|---------|----|
| 1   | 19,25 | 83624   | 2,320   | BB |
| 2   | 21,05 | 3510477 | 97,392  | BB |
| 3   | 22,62 | 10386   | 0,288   | BB |
|     |       | 3604487 | 100,000 |    |

Peak rejection level: 0

## Generic Display Report

## Analysis Info

Analysis Name D:\Data\IPMC\PharmChemie\Routine\APCI\12\_08\WJU\_AJ422.d  
Method APCI\_directprobe\_positiv.m  
Sample Name AJ422  
Comment Junker  
APCI-Direkt  
Kalibration mit Fettsaeureestern

Acquisition Date 8/29/2012 9:41:13 AM

Operator Meiners

Instrument micrOTOF-Q II

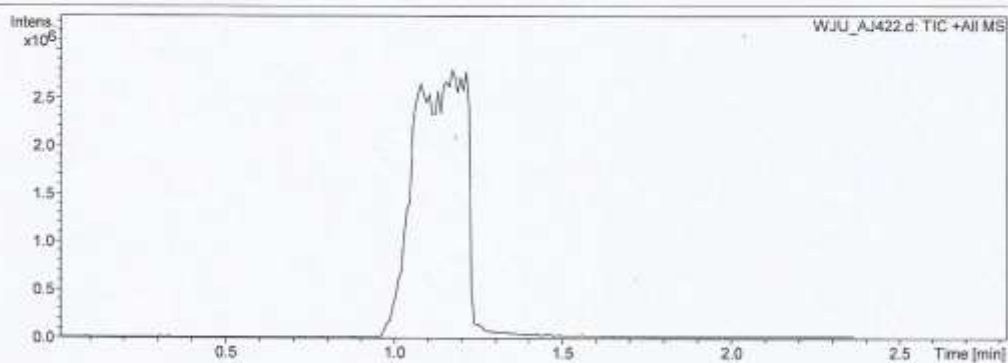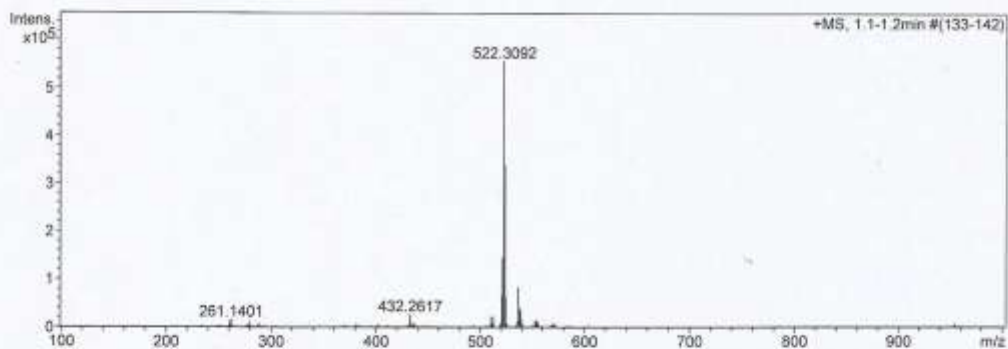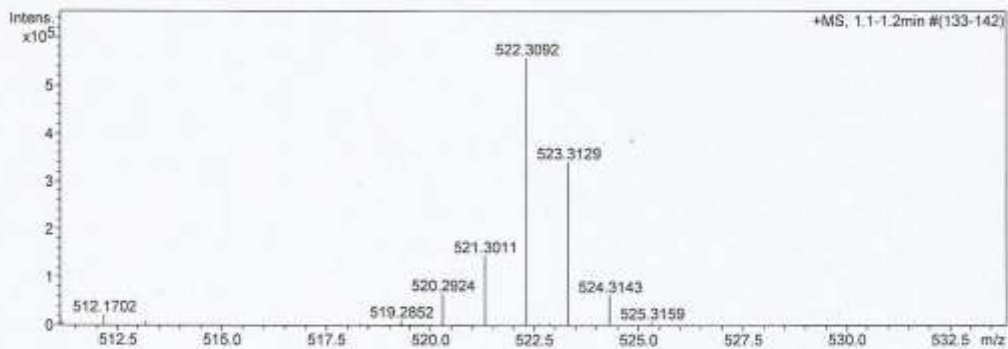

# Mass Spectrum SmartFormula Report

## Analysis Info

Analysis Name D:\Data\IPMC\PharmChemie\Routine\APCI\12\_08\WJU\_AJ422.d  
 Method APCI\_directprobe\_positiv.m  
 Sample Name AJ422  
 Comment Junker  
 APCI-Direkt  
 Kalibration mit Fettsaeureestern

Acquisition Date 8/29/2012 9:41:13 AM

Operator Meiners

Instrument / Ser# micrOTOF-Q II 10252

## Acquisition Parameter

Source Type APCI Ion Polarity Positive Set Nebulizer 0.7 Bar  
 Focus Not active Set Capillary 4000 V Set Dry Heater 200 °C  
 Scan Begin 100 m/z Set End Plate Offset -500 V Set Dry Gas 3.0 l/min  
 Scan End 1000 m/z Set Collision Cell RF 130.0 Vpp Set Divert Valve Waste

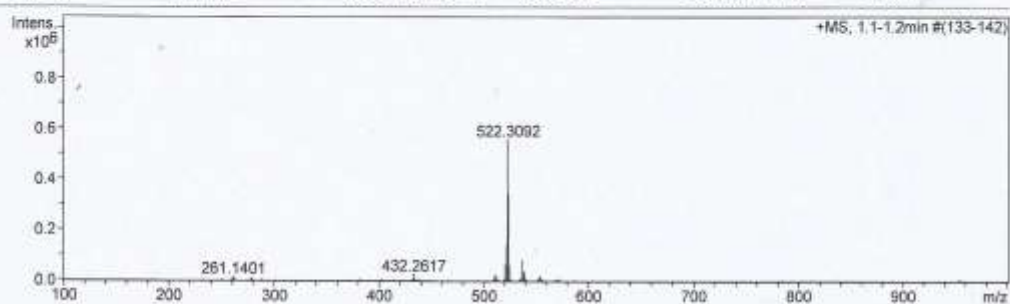

| Meas. m/z | # | Formula                                                        | Score  | m/z      | err [mDa] | err [ppm] | mSigma | rdB  | e <sup>-</sup> | Conf | N-Rule |
|-----------|---|----------------------------------------------------------------|--------|----------|-----------|-----------|--------|------|----------------|------|--------|
| 522.3092  | 1 | C <sub>34</sub> H <sub>40</sub> N <sub>3</sub> O <sub>2</sub>  | 55.11  | 522.3115 | 2.3       | 4.4       | 114.7  | 16.5 | even           |      | ok     |
|           | 2 | C <sub>30</sub> H <sub>36</sub> N <sub>3</sub>                 | 100.00 | 522.3088 | -0.4      | -0.7      | 128.4  | 17.5 | even           |      | ok     |
|           | 3 | C <sub>29</sub> H <sub>40</sub> N <sub>5</sub> O <sub>4</sub>  | 22.17  | 522.3075 | -1.7      | -3.3      | 138.8  | 12.5 | even           |      | ok     |
|           | 4 | C <sub>28</sub> H <sub>44</sub> N <sub>3</sub> O <sub>8</sub>  | 3.28   | 522.3061 | -3.0      | -5.8      | 151.2  | 7.5  | even           |      | ok     |
|           | 5 | C <sub>17</sub> H <sub>44</sub> N <sub>7</sub> O <sub>11</sub> | 0.70   | 522.3093 | 0.1       | 0.3       | 198.4  | -0.5 | even           |      | ok     |
|           | 6 | C <sub>19</sub> H <sub>36</sub> N <sub>15</sub> O <sub>3</sub> | 0.08   | 522.3120 | 2.8       | 5.4       | 203.6  | 9.5  | even           |      | ok     |
|           | 7 | C <sub>15</sub> H <sub>32</sub> N <sub>21</sub> O              | 0.13   | 522.3093 | 0.1       | 0.3       | 217.3  | 10.5 | even           |      | ok     |
|           | 8 | C <sub>18</sub> H <sub>40</sub> N <sub>11</sub> O <sub>7</sub> | 0.06   | 522.3107 | 1.5       | 2.8       | 217.5  | 4.5  | even           |      | ok     |
|           | 9 | C <sub>14</sub> H <sub>36</sub> N <sub>17</sub> O <sub>5</sub> | 0.02   | 522.3080 | -1.2      | -2.3      | 230.8  | 5.5  | even           |      | ok     |



2-(4-Methylphenyl)-N-{4-[N-(thiazol-2-yl)sulfamoyl]phenyl}-6,7-dihydro-5H-benzo[7]annulene-8-carboxamide (**8d**)

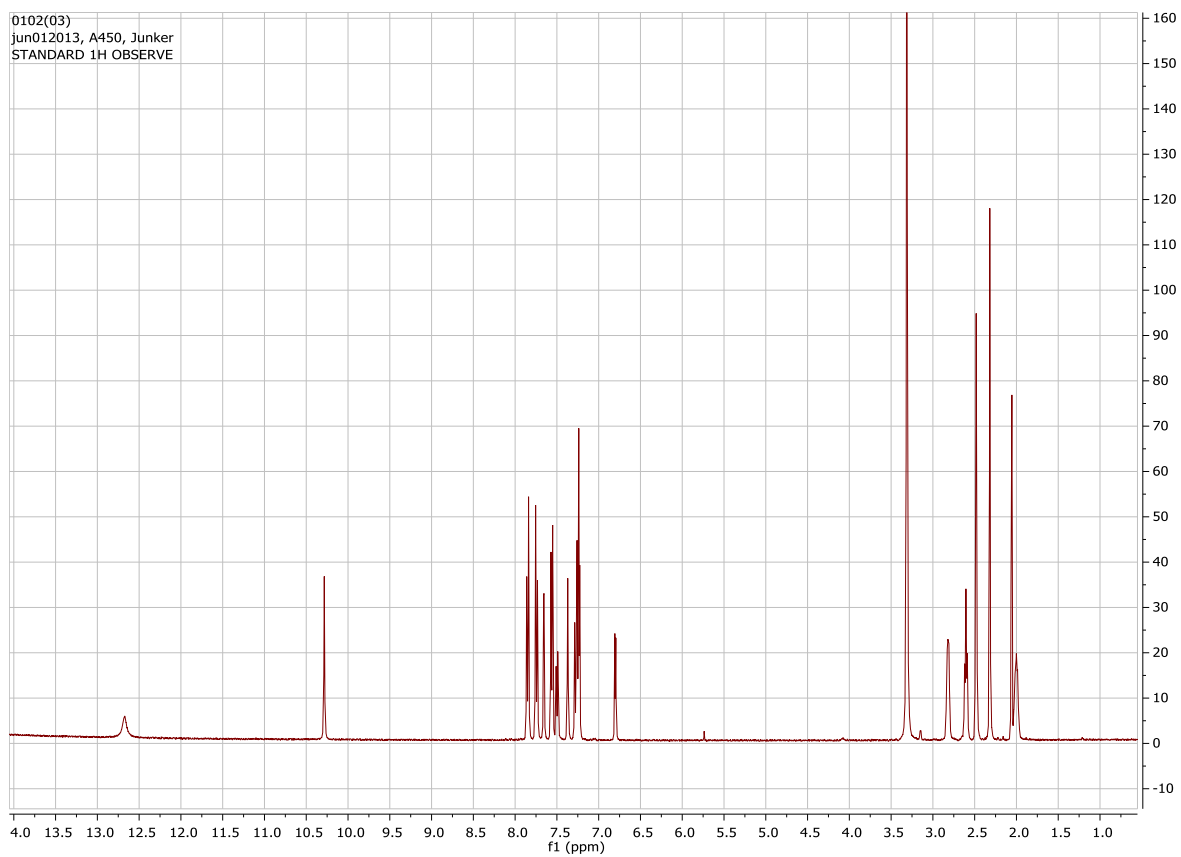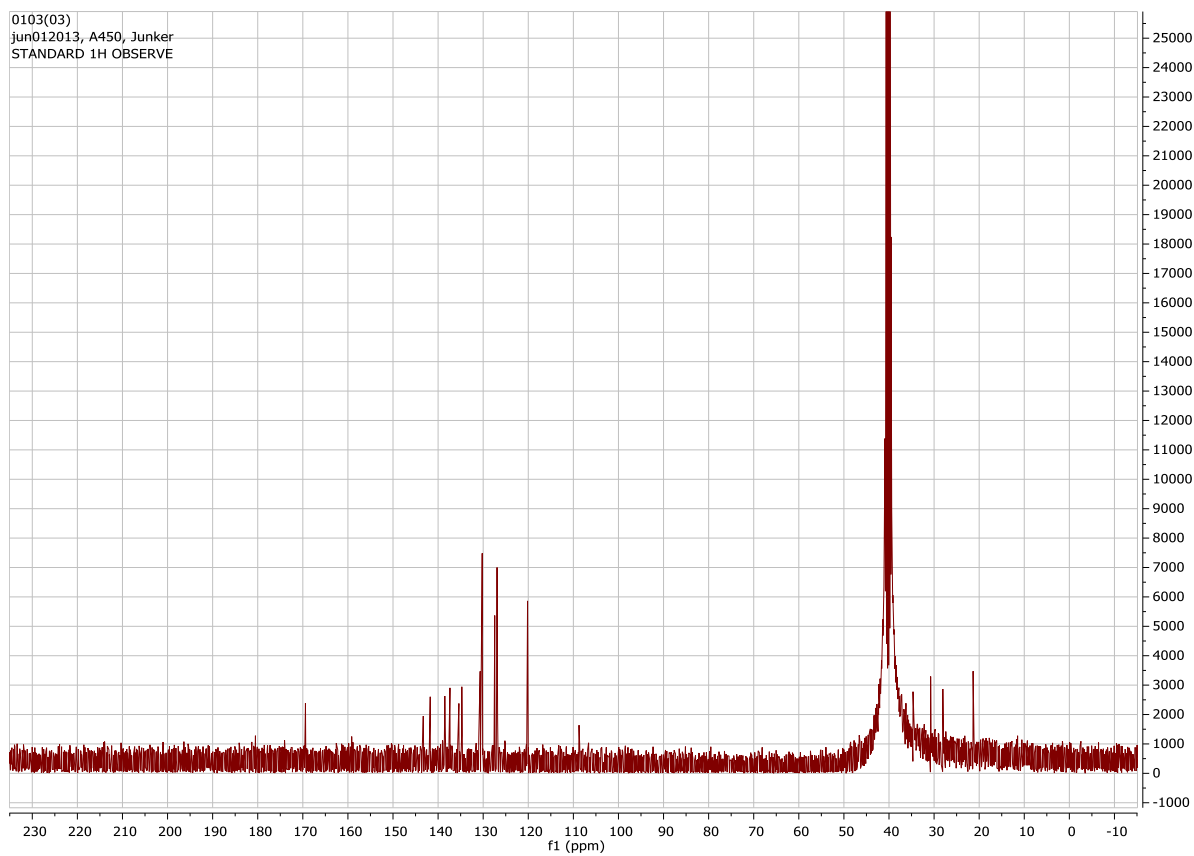

S46

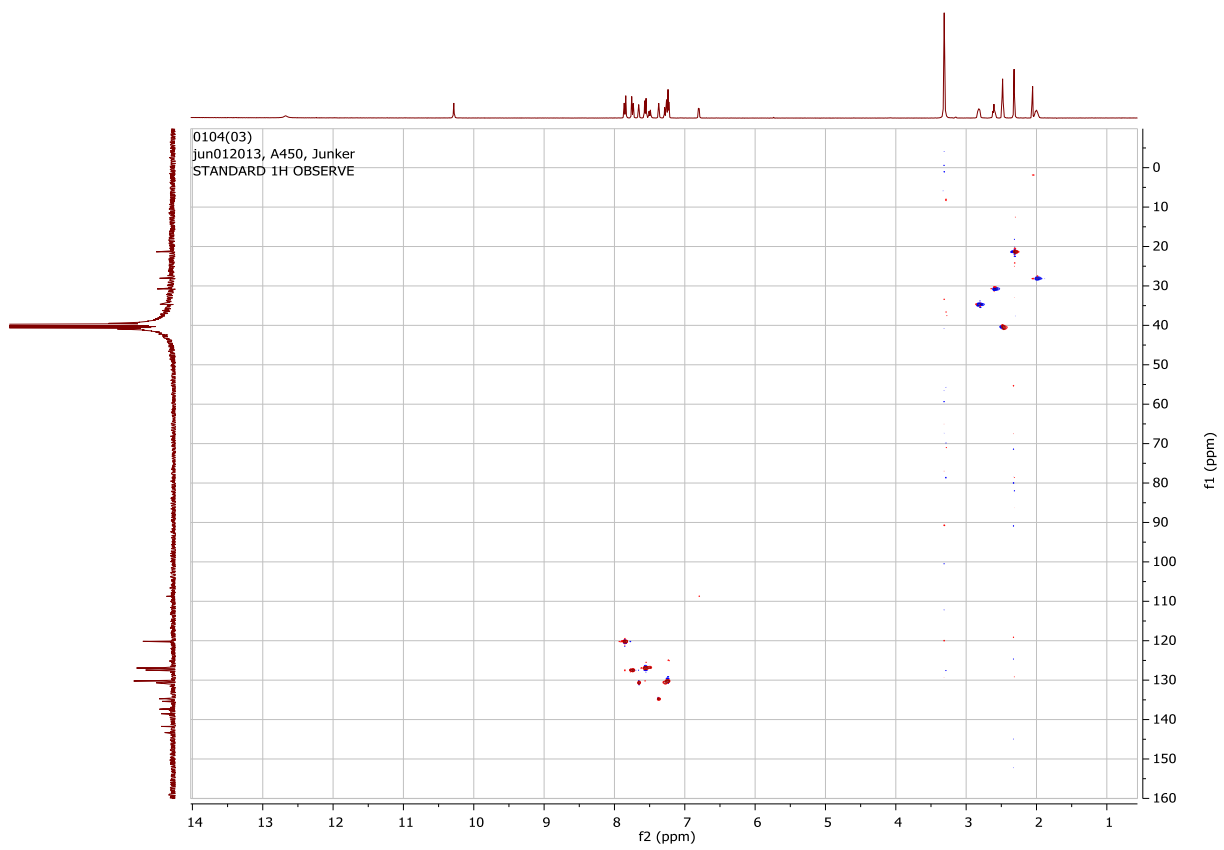

# HPLC

Analyzed: 01.08.12 20:33

Reported: 02.08.12 14:52

Processed: 02.08.12 14:52

Data Path: D:\WIN32APP\HSM\Chromni\DATA\5040\

Application: Chromni

Series: 5040

**Sample Name: AJ450**

Vial Number: 4

Injection from this vial: 1 of 1

Vial Type: UNK

Volume: 5,0 ul

Chrom Type: HPLC Channel : 1

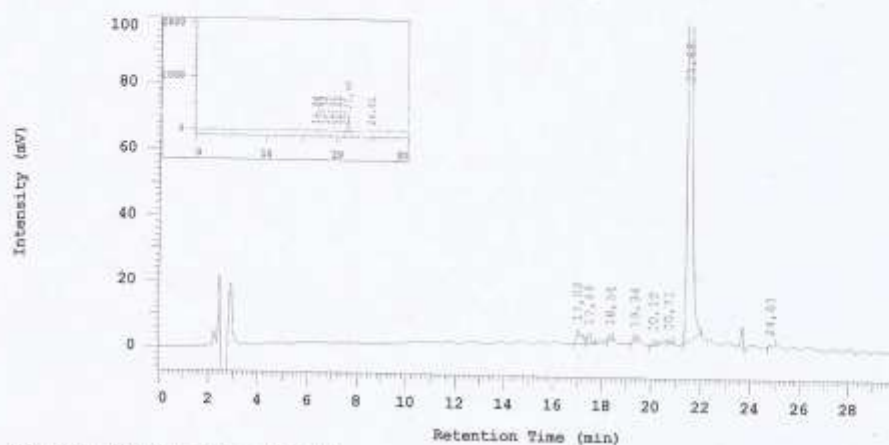

Acquisition Method: Chromni

Blank Subtr Sample Name: ACN

Column Type: 010

Solvent A: Wasser + 0,05%TFA

Developed by: Jens

Solvent B: ACN + 0,05%TFA

| No. | RT    | Area    | Conc 1  | BC |
|-----|-------|---------|---------|----|
| 1   | 17,02 | 59365   | 1,998   | BB |
| 2   | 17,49 | 31310   | 1,054   | BB |
| 3   | 18,34 | 14160   | 0,477   | BB |
| 4   | 19,34 | 16394   | 0,552   | BB |
| 5   | 20,10 | 12356   | 0,416   | BB |
| 6   | 20,71 | 7961    | 0,268   | BB |
| 7   | 21,48 | 2829381 | 95,236  | BB |
| 8   | 24,81 | 0       | 0,000   |    |
|     |       | 2970927 | 100,000 |    |

Peak rejection level: 0

## Generic Display Report

## Analysis Info

Analysis Name: \\p2-ms\PI\PharmChemie\Routine\APCI\12\_08\WJU\_AJ45001.d  
Method: APCI\_directprobe\_positiv.m  
Sample Name: AJ45001  
Comment: Junker  
APCI-Direkt  
Kalibration mit Fettsaeureestern

Acquisition Date: 02.08.2012 11:16:38

Operator: Meiners  
Instrument: micrOTOF-Q II

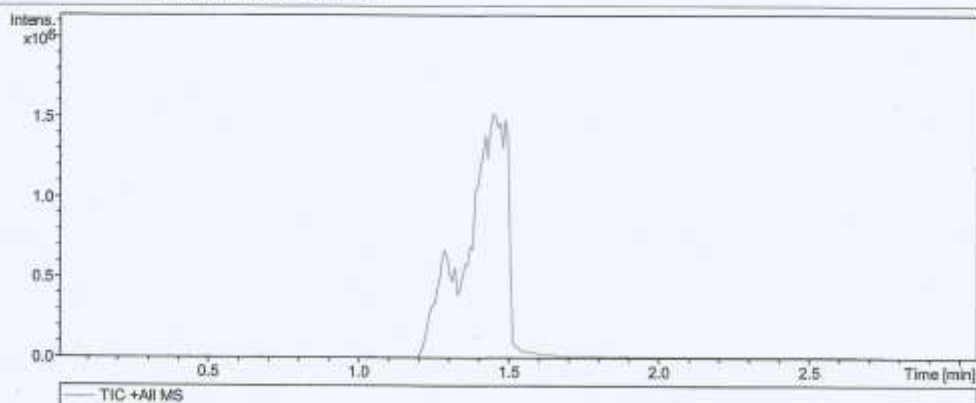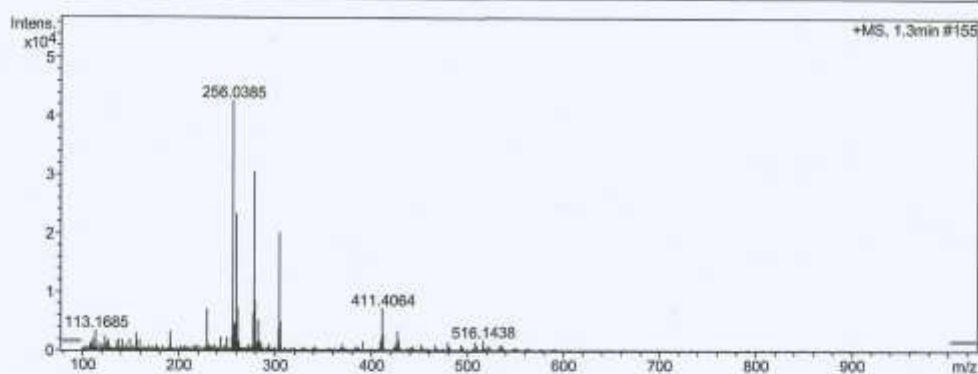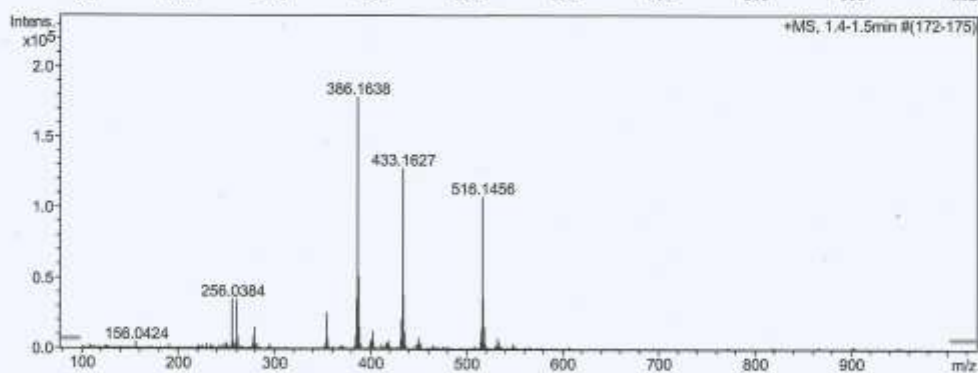

# Mass Spectrum SmartFormula Report

## Analysis Info

Analysis Name: D:\Data\IPMC\PharmChemie\Routine\APC\12\_08\WJU\_AJ45001.d  
 Method: APCI\_directprobe\_positiv.m  
 Sample Name: AJ45001  
 Comment: Junker  
 APCI-Direkt  
 Kalibration mit Fettsaeureestern

Acquisition Date: 8/2/2012 11:16:38 AM

Operator: Meiners

Instrument / Ser#: microTOF-Q II 10252

## Acquisition Parameter

Source Type: APCI  
 Focus: Not active  
 Scan Begin: 100 m/z  
 Scan End: 1000 m/z  
 Ion Polarity: Positive  
 Set Capillary: 4000 V  
 Set End Plate Offset: -500 V  
 Set Collision Cell RF: 130.0 Vpp  
 Set Nebulizer: 0.7 Bar  
 Set Dry Heater: 200 °C  
 Set Dry Gas: 3.0 l/min  
 Set Divert Valve: Waste

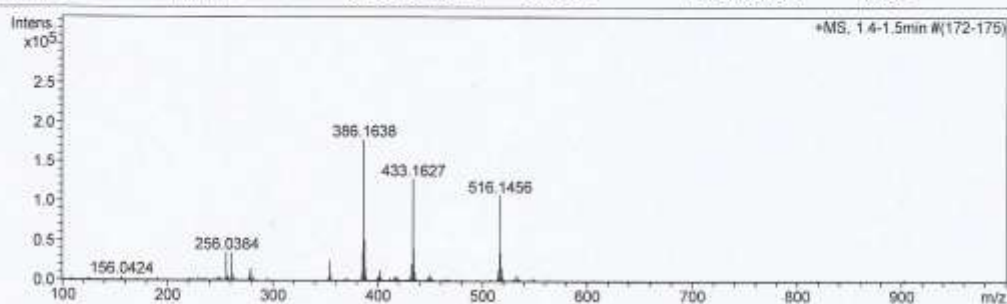

| Meas. m/z | #  | Formula                                                                      | Score  | m/z      | err [mDa] | err [ppm] | mSigma | rdb  | e <sup>-</sup> Conf | N-Rule |
|-----------|----|------------------------------------------------------------------------------|--------|----------|-----------|-----------|--------|------|---------------------|--------|
| 516.1456  | 1  | C <sub>28</sub> H <sub>26</sub> N <sub>3</sub> O <sub>3</sub> S <sub>2</sub> | 4.02   | 516.1410 | -4.6      | -9.0      | 1.7    | 17.5 | even                | ok     |
|           | 2  | C <sub>27</sub> H <sub>26</sub> N <sub>5</sub> O <sub>2</sub> S <sub>2</sub> | 0.18   | 516.1522 | 6.6       | 12.8      | 2.4    | 17.5 | even                | ok     |
|           | 3  | C <sub>24</sub> H <sub>22</sub> N <sub>9</sub> O <sub>5</sub> S <sub>2</sub> | 0.04   | 516.1383 | -7.3      | -14.2     | 12.4   | 18.5 | even                | ok     |
|           | 4  | C <sub>26</sub> H <sub>30</sub> N <sub>6</sub> O <sub>6</sub> S <sub>2</sub> | 1.31   | 516.1509 | 5.3       | 10.2      | 14.1   | 12.5 | even                | ok     |
|           | 5  | C <sub>23</sub> H <sub>22</sub> N <sub>11</sub> S <sub>2</sub>               | 7.77   | 516.1496 | 3.9       | 7.6       | 14.2   | 18.5 | even                | ok     |
|           | 6  | C <sub>25</sub> H <sub>30</sub> N <sub>3</sub> O <sub>3</sub> S <sub>3</sub> | 72.93  | 516.1444 | -1.3      | -2.4      | 20.0   | 12.5 | even                | ok     |
|           | 7  | C <sub>33</sub> H <sub>26</sub> N <sub>5</sub> O <sub>5</sub> S <sub>2</sub> | 100.00 | 516.1450 | -0.6      | -1.2      | 22.2   | 21.5 | even                | ok     |
|           | 8  | C <sub>23</sub> H <sub>26</sub> N <sub>5</sub> O <sub>5</sub> S <sub>2</sub> | 0.00   | 516.1370 | -8.7      | -16.8     | 23.5   | 13.5 | even                | ok     |
|           | 9  | C <sub>30</sub> H <sub>30</sub> N <sub>5</sub> O <sub>3</sub> S <sub>3</sub> | 20.81  | 516.1484 | 2.8       | 5.4       | 24.5   | 16.5 | even                | ok     |
|           | 10 | C <sub>23</sub> H <sub>34</sub> N <sub>6</sub> O <sub>6</sub> S <sub>3</sub> | 0.00   | 516.1543 | 8.6       | 16.7      | 27.1   | 7.5  | even                | ok     |
|           | 11 | C <sub>27</sub> H <sub>34</sub> N <sub>6</sub> O <sub>5</sub> S <sub>4</sub> | 0.20   | 516.1518 | 6.1       | 11.9      | 37.0   | 11.5 | even                | ok     |
|           | 12 | C <sub>24</sub> H <sub>30</sub> N <sub>5</sub> S <sub>4</sub>                | 0.01   | 516.1379 | -7.8      | -15.1     | 37.4   | 12.5 | even                | ok     |

*2-(4-Methylphenyl)-N-(thiazol-2-yl)-6,7-dihydro-5H-benzo[7]annulene-8-carboxamide***(8e)**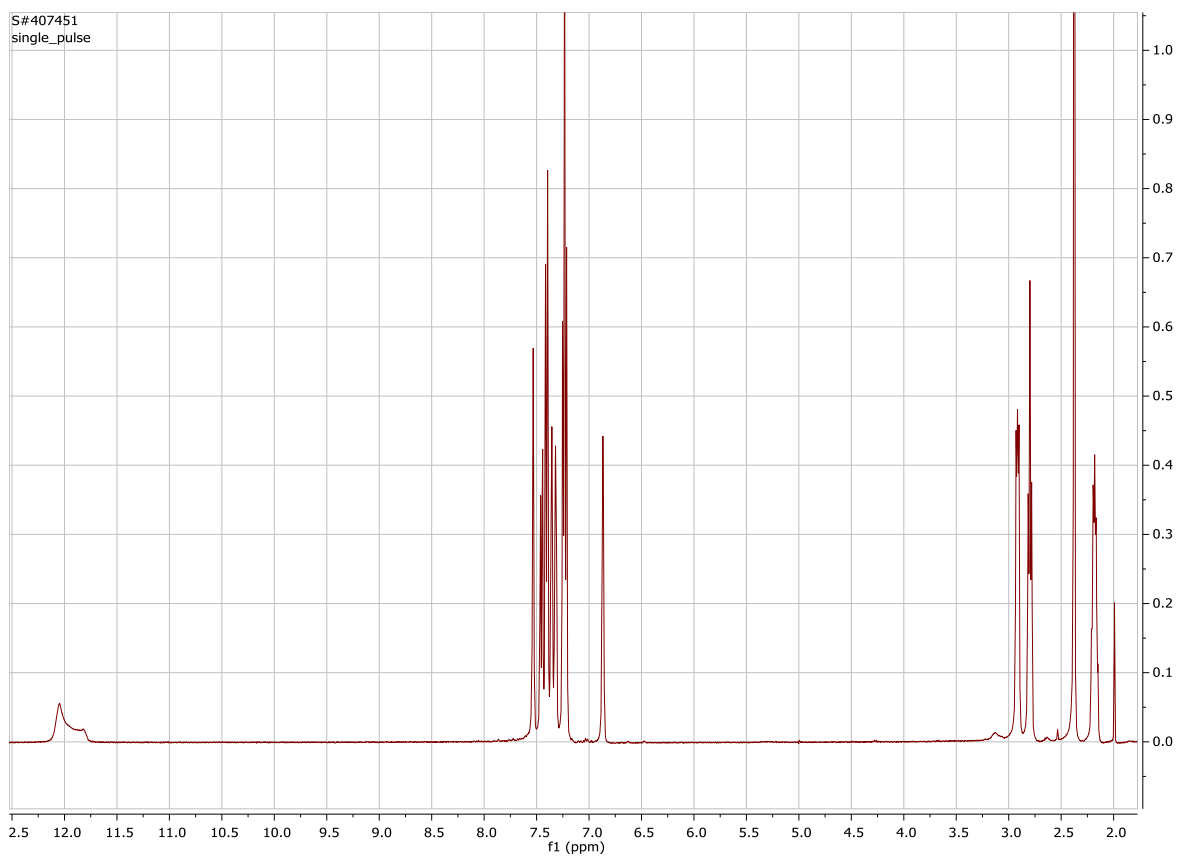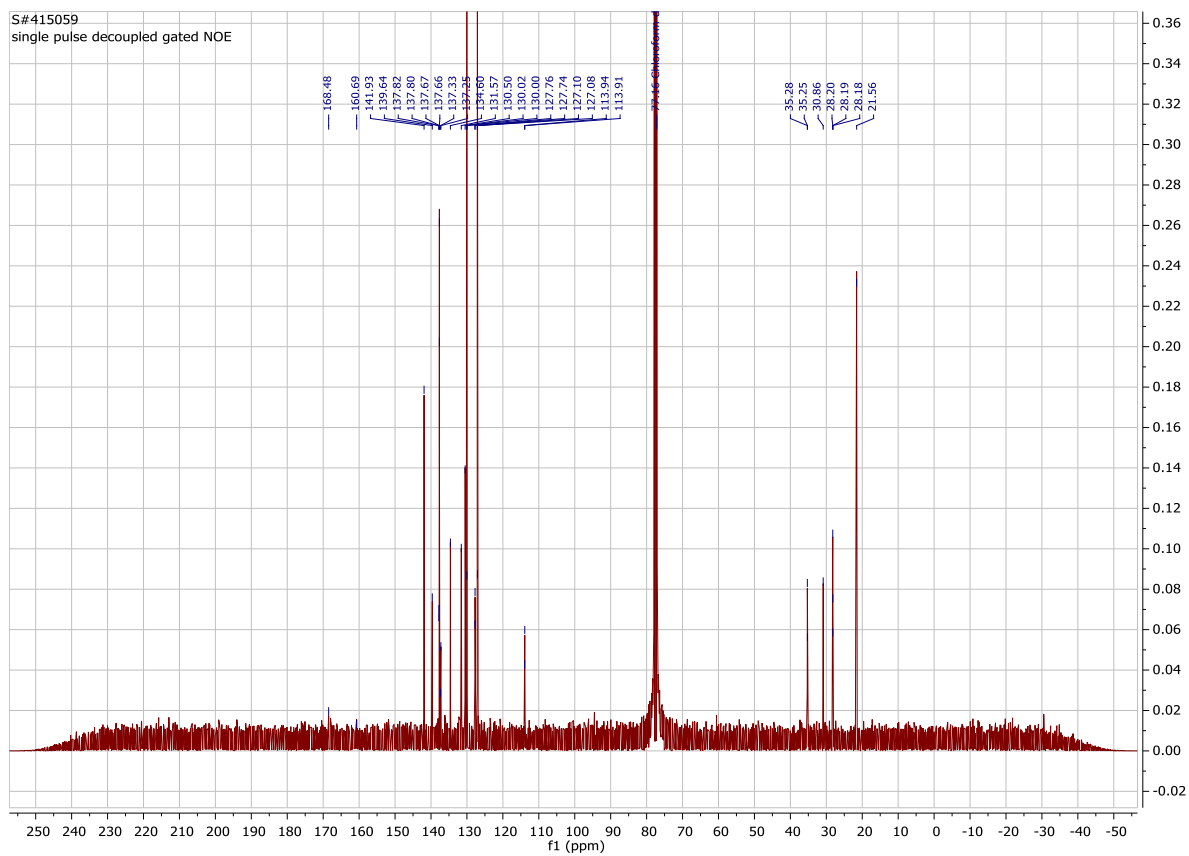

# HPLC

Analyzed: 01.08.12 21:14

Reported: 02.08.12 14:53

Processed: 02.08.12 14:53

Data Path: D:\WIN32APP\HSM\Chromni\DATA\5041\

Application: Chromni

Series: 5041

Sample Name: AJ451

Vial Number: 5

Injection from this vial: 1 of 1

Vial Type: UNK

Volume: 5,0 ul

Chrom Type: HPLC Channel : 1

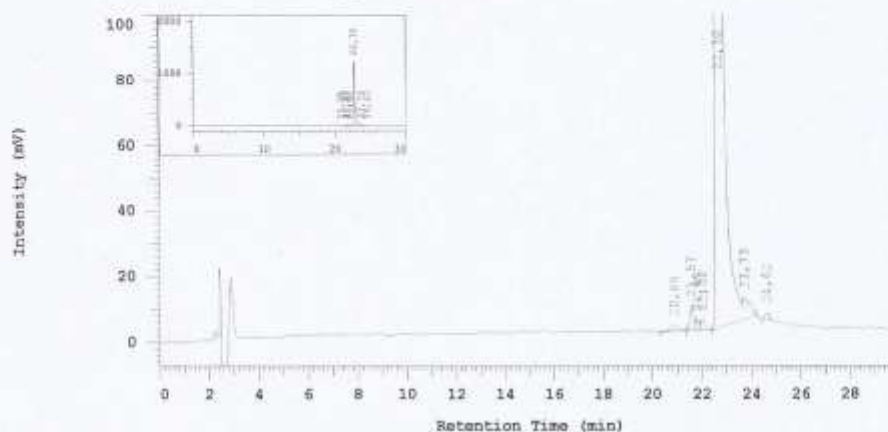

Acquisition Method: Chromni

Blank Subtr Sample Name: ACN

Column Type: 010

Solvent A: Wasser + 0,05%TFA

Developed by: Jens

Solvent B: ACN + 0,05%TFA

| No. | RT    | Area     | Conc 1  | BC |
|-----|-------|----------|---------|----|
| 1   | 20,88 | 29614    | 0,225   | BB |
| 2   | 21,57 | 73226    | 0,557   | BV |
| 3   | 21,81 | 30315    | 0,231   | VV |
| 4   | 22,02 | 39341    | 0,299   | VB |
| 5   | 22,70 | 12816108 | 97,547  | BV |
| 6   | 23,73 | 132491   | 1,008   | MC |
| 7   | 24,62 | 17280    | 0,132   | BB |
|     |       | 13138375 | 100,000 |    |

Peak rejection level: 0

361.1375 0.8 mDa

## Generic Display Report

## Analysis Info

Analysis Name D:\Data\IPMC\PharmChemie\Routine\APC\12\_08\WJU\_AJ45101.d  
Method APCI\_directprobe\_positiv.m  
Sample Name AJ45101  
Comment Junker  
APCI-Direkt  
Kalibration mit Fettsaeureestern

Acquisition Date 8/2/2012 9:12:36 AM

Operator

Meiners

Instrument

micrOTOF-Q II

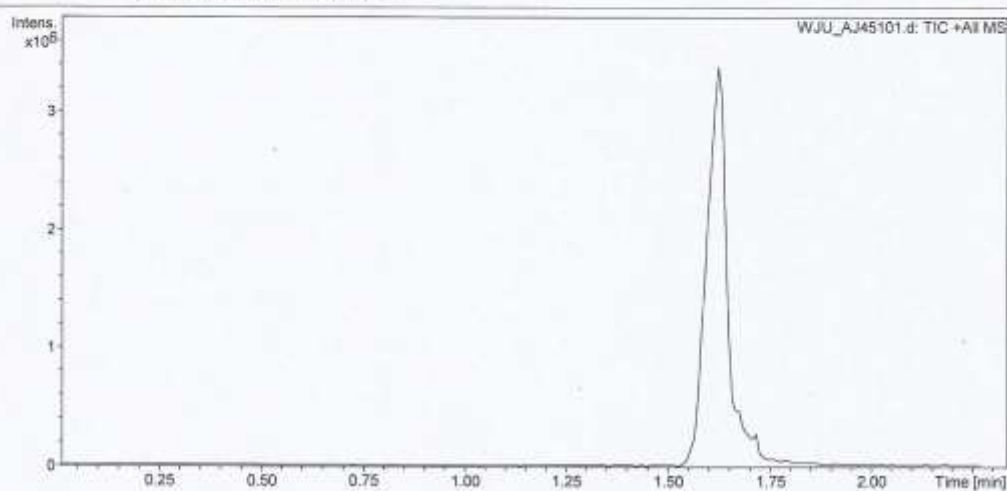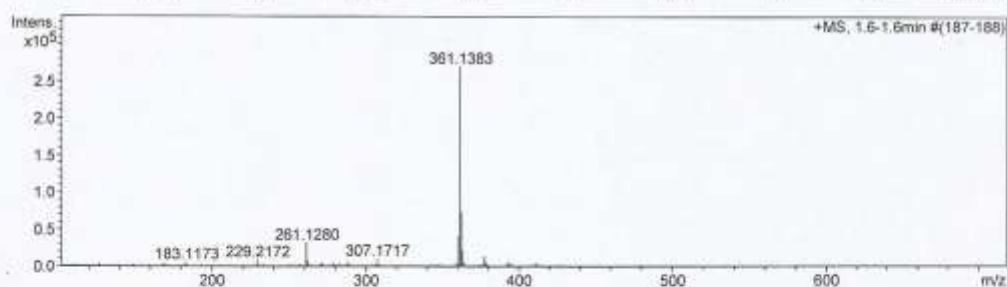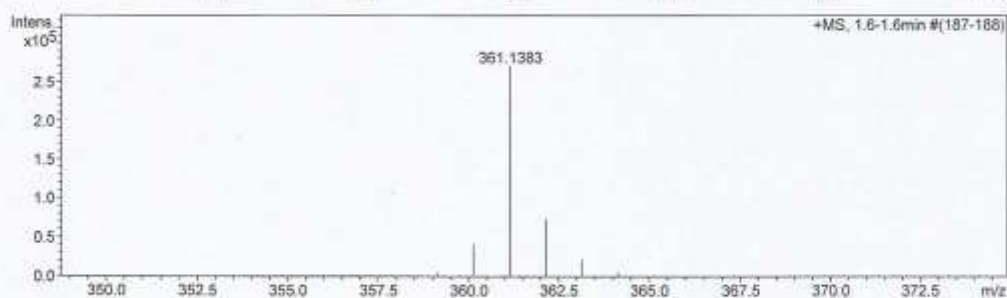



# Mass Spectrum SmartFormula Report

## Analysis Info

Analysis Name: D:\Data\IPMC\PharmChemie\Routine\APCI\12\_08\WJU\_AJ45101.d  
 Method: APCI\_directprobe\_positiv.m  
 Sample Name: AJ45101  
 Comment: Junker  
 APCI-Direkt  
 Kalibration mit Fettsaeureestern

Acquisition Date: 8/2/2012 9:12:36 AM

Operator: Meiners

Instrument / Ser#: microTOF-Q II 10252

## Acquisition Parameter

Source Type: APCI  
 Focus: Not active  
 Scan Begin: 100 m/z  
 Scan End: 1000 m/z  
 Ion Polarity: Positive  
 Set Capillary: 4000 V  
 Set End Plate Offset: -500 V  
 Set Collision Cell RF: 130.0 Vpp  
 Set Nebulizer: 0.7 Bar  
 Set Dry Heater: 200 °C  
 Set Dry Gas: 3.0 l/min  
 Set Divert Valve: Waste

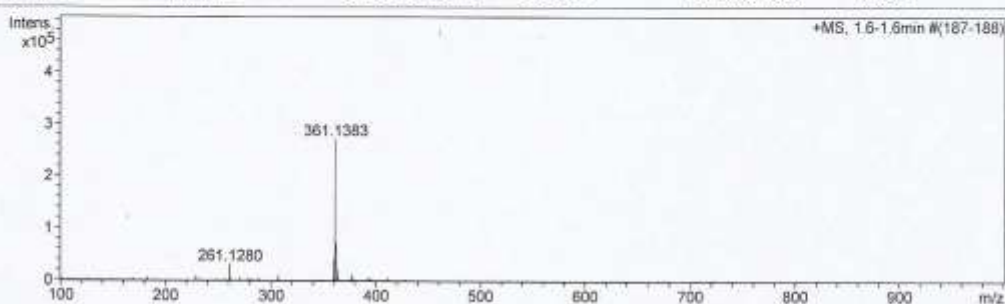

| Meas. m/z | # | Formula                                                                      | Score  | m/z      | err [mDa] | err [ppm] | mSigma | rdB  | e <sup>-</sup> Conf | N-Rule |
|-----------|---|------------------------------------------------------------------------------|--------|----------|-----------|-----------|--------|------|---------------------|--------|
| 361.1383  | 1 | C <sub>22</sub> H <sub>21</sub> N <sub>2</sub> O <sub>5</sub> S              | 100.00 | 361.1369 | -1.4      | -3.8      | 7.7    | 13.5 | even                | ok     |
|           | 2 | C <sub>19</sub> H <sub>25</sub> N <sub>2</sub> O <sub>5</sub> S <sub>2</sub> | 43.54  | 361.1403 | 2.0       | 5.5       | 27.1   | 8.5  | even                | ok     |

2-[(4-Methyl)phenyl]-N-{4-[(piperidin-1-yl)methyl]phenyl}-6,7-dihydro-5H-benzo[7]annulene-8-carboxamide (**8f**)

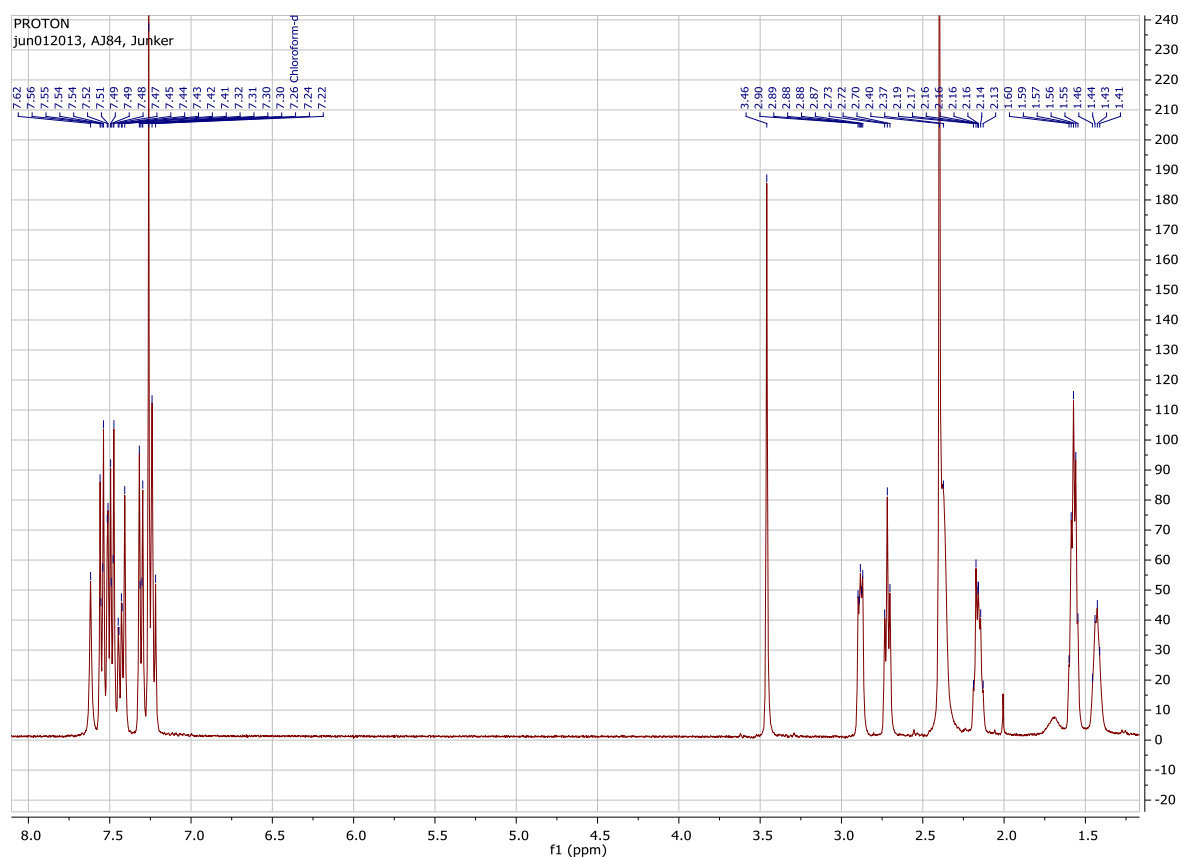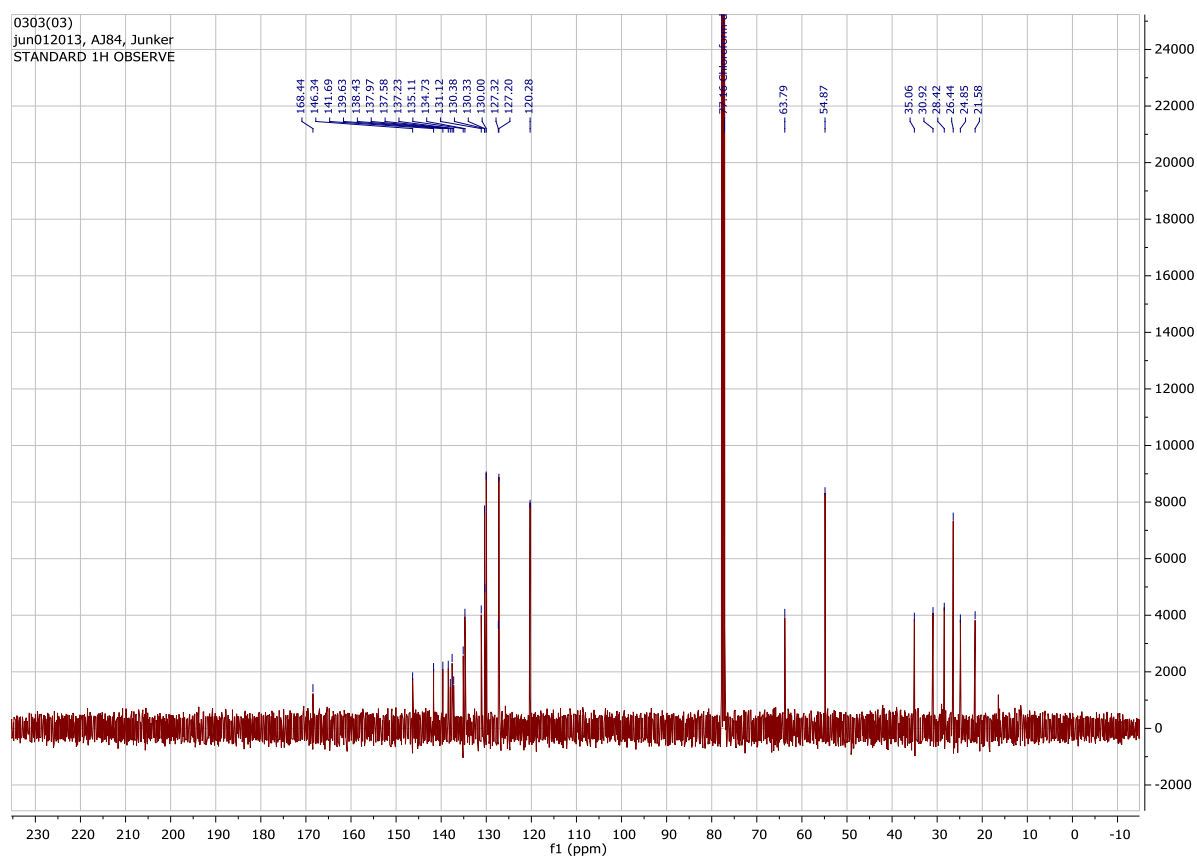

S55

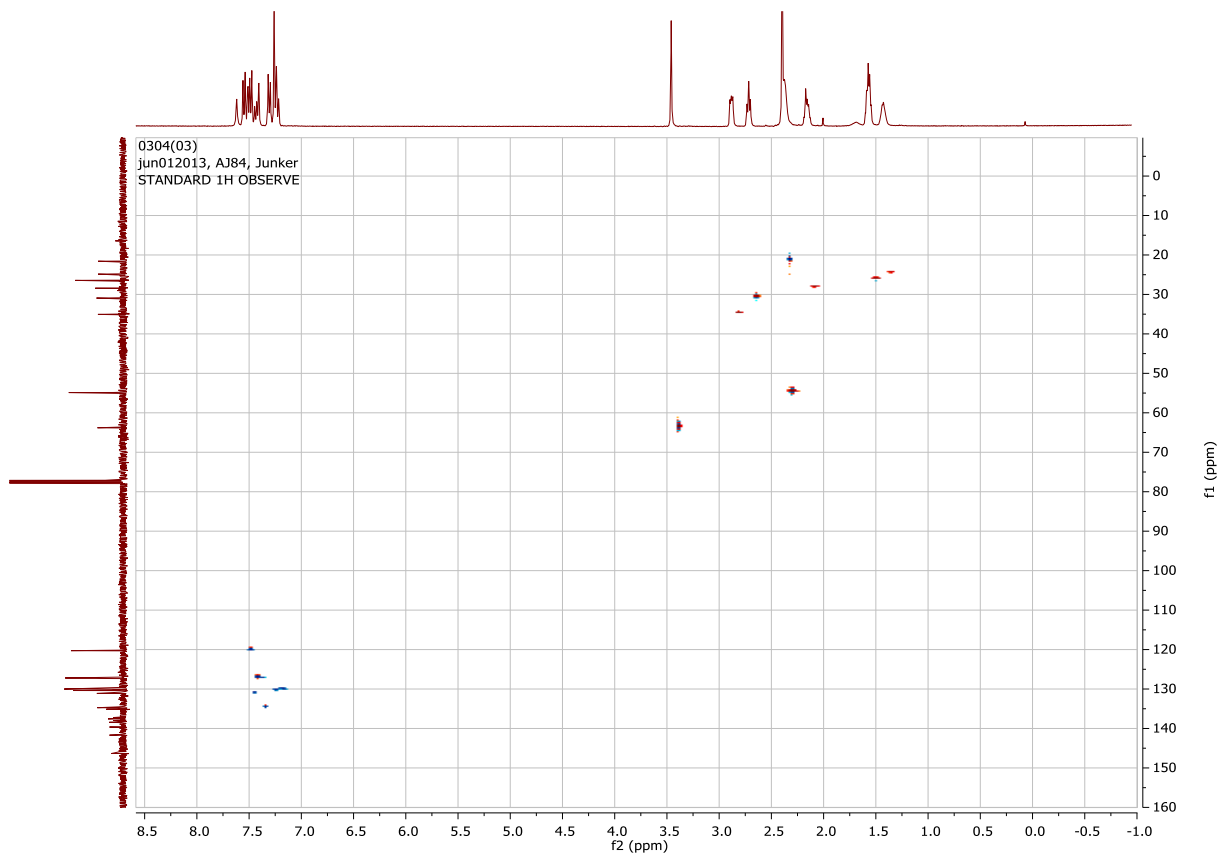

# HPLC

Analyzed: 24.01.13 05:53

Reported: 25.01.13 10:18  
Processed: 25.01.13 10:18

Data Path: D:\WIN32APP\HSM\Chromni\DATA\5856\

Application: Chromni

Series: 5856

**Sample Name: AJ84**

Vial Number: 15

Injection from this vial: 1 of 1

Vial Type: UNK

Volume: 5,0 ul

Chrom Type: HPLC Channel : 1

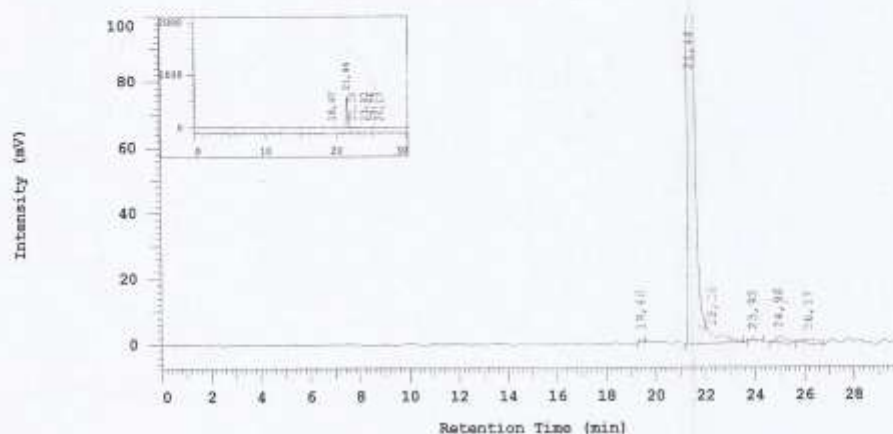

Acquisition Method: Chromni

Blank Subtr Sample Name: ACN

Column Type: 010

Solvent A: Wasser + 0,05%TFA

Developed by: Jens

Solvent B: ACN + 0,05%TFA

| No. | RT    | Area    | Conc 1  | BC |
|-----|-------|---------|---------|----|
| 1   | 19,40 | 11066   | 0,159   | BB |
| 2   | 21,44 | 6638365 | 95,646  | MC |
| 3   | 22,28 | 172954  | 2,492   | MC |
| 4   | 23,92 | 16415   | 0,237   | MC |
| 5   | 24,96 | 52086   | 0,750   | MC |
| 6   | 26,17 | 49657   | 0,715   | BB |
|     |       | 6940543 | 100,000 |    |

Peak rejection level: 0

## Generic Display Report

## Analysis Info

Analysis Name E:\Meiners\2013\_01\_14\AJ84\_BC5\_01\_9215.d  
Method tune\_low\_lcms\_routine\_positiv\_10min.m  
Sample Name AJ84  
Comment Junker  
Kalibration mit LI-Formate

Acquisition Date 1/14/2013 6:11:02 PM

Operator Meiners  
Instrument micrOTOF-Q II

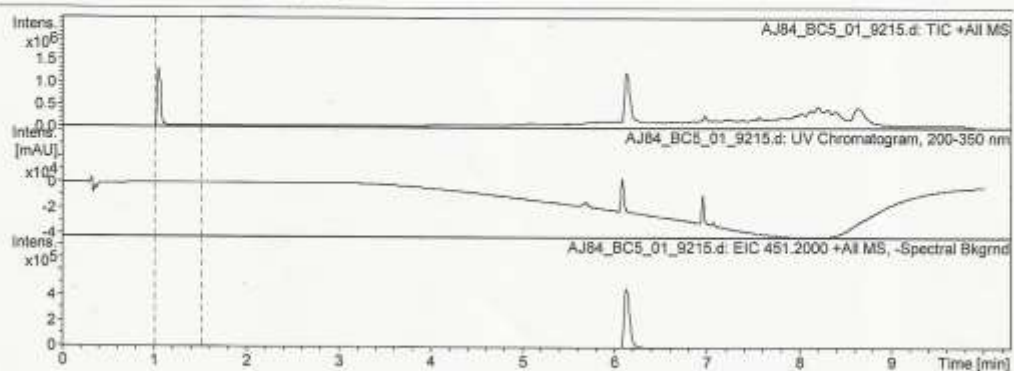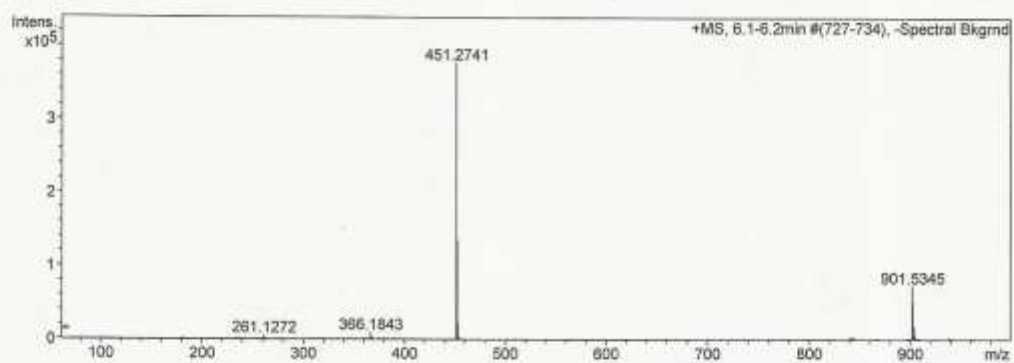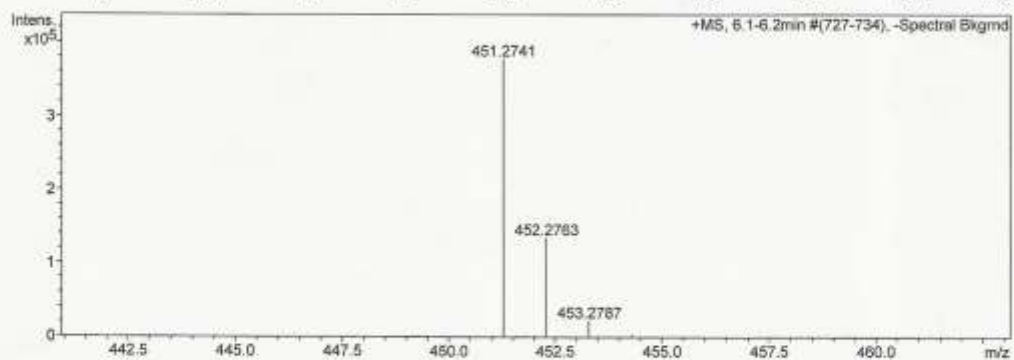

## Mass Spectrum SmartFormula Report

**Analysis Info**

Analysis Name E:\Meiners\2013\_01\_14\AJ84\_BC5\_01\_9215.d  
 Method tune\_low\_lcms\_routine\_positiv\_10min.m  
 Sample Name AJ84  
 Comment Junker  
 Kalibration mit Li-Formate

Acquisition Date 1/14/2013 6:11:02 PM

Operator Meiners  
 Instrument / Ser# micrOTOF-Q II 10252

**Acquisition Parameter**

|             |            |                       |           |                  |           |
|-------------|------------|-----------------------|-----------|------------------|-----------|
| Source Type | ESI        | Ion Polarity          | Positive  | Set Nebulizer    | 2.0 Bar   |
| Focus       | Not active | Set Capillary         | 4500 V    | Set Dry Heater   | 200 °C    |
| Scan Begin  | 100 m/z    | Set End Plate Offset  | -500 V    | Set Dry Gas      | 9.0 l/min |
| Scan End    | 1000 m/z   | Set Collision Cell RF | 300.0 Vpp | Set Divert Valve | Waste     |

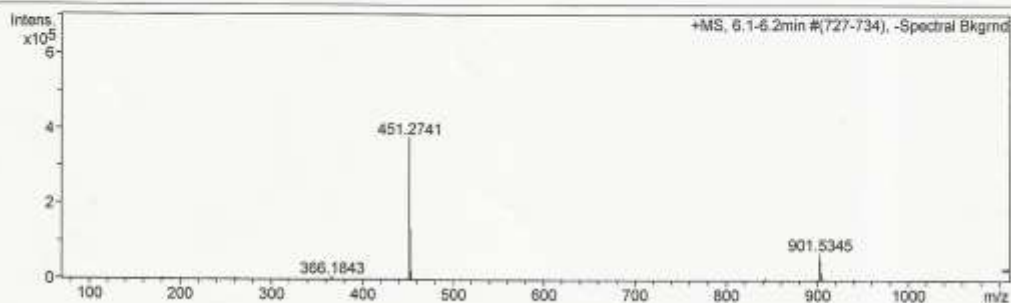

| Meas. m/z | # | Formula           | Score  | m/z      | err [mDa] | err [ppm] | mSigma | rdb  | e <sup>-</sup> Conf | N-Rule |
|-----------|---|-------------------|--------|----------|-----------|-----------|--------|------|---------------------|--------|
| 451.2741  | 1 | C 31 H 35 N 2 O   | 100.00 | 451.2744 | 0.3       | 0.7       | 4.8    | 15.5 | even                | ok     |
|           | 2 | C 26 H 35 N 4 O 3 | 4.05   | 451.2704 | -3.7      | -8.2      | 32.7   | 11.5 | even                | ok     |

*N*-{4-[*N*-Methyl-*N*-(tetrahydro-2*H*-pyran-4-yl)aminomethyl]phenyl}-6,7-dihydro-5*H*-benzo[7]annulene-8-carboxamide (**9a**)

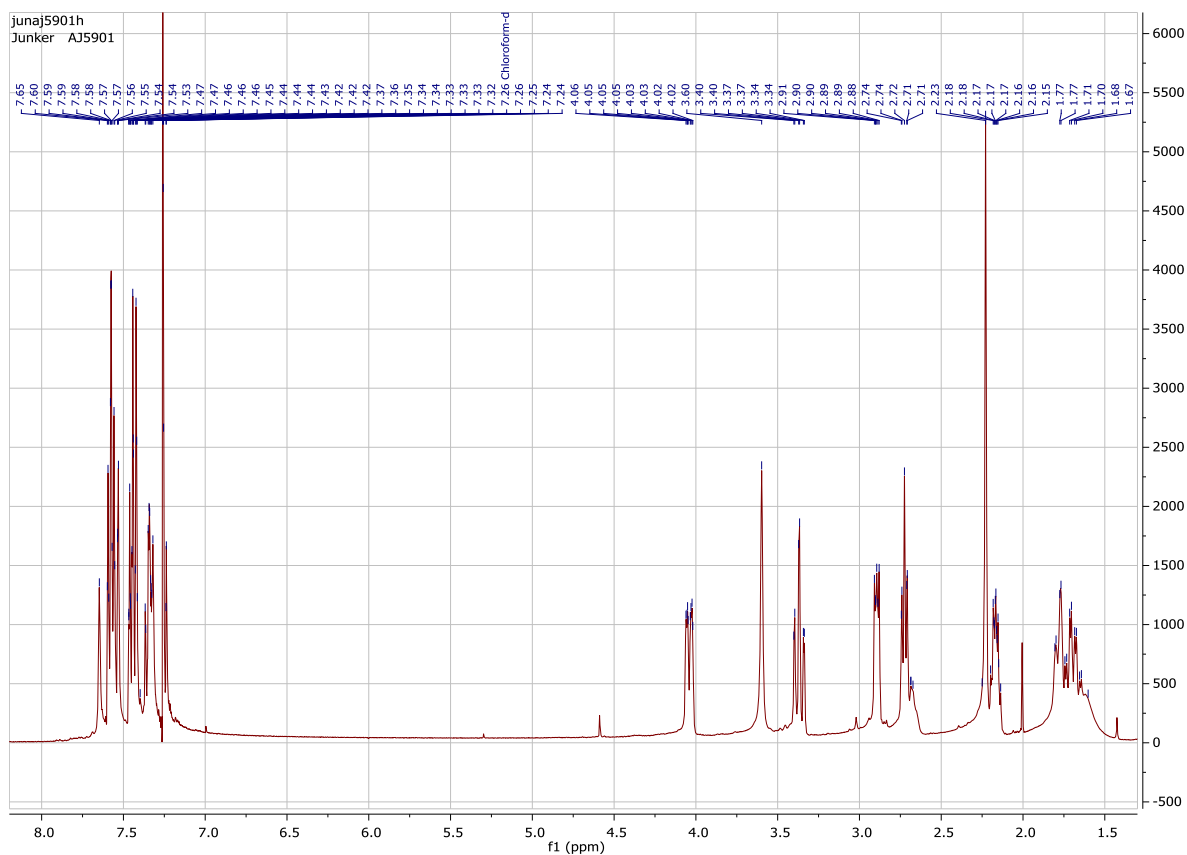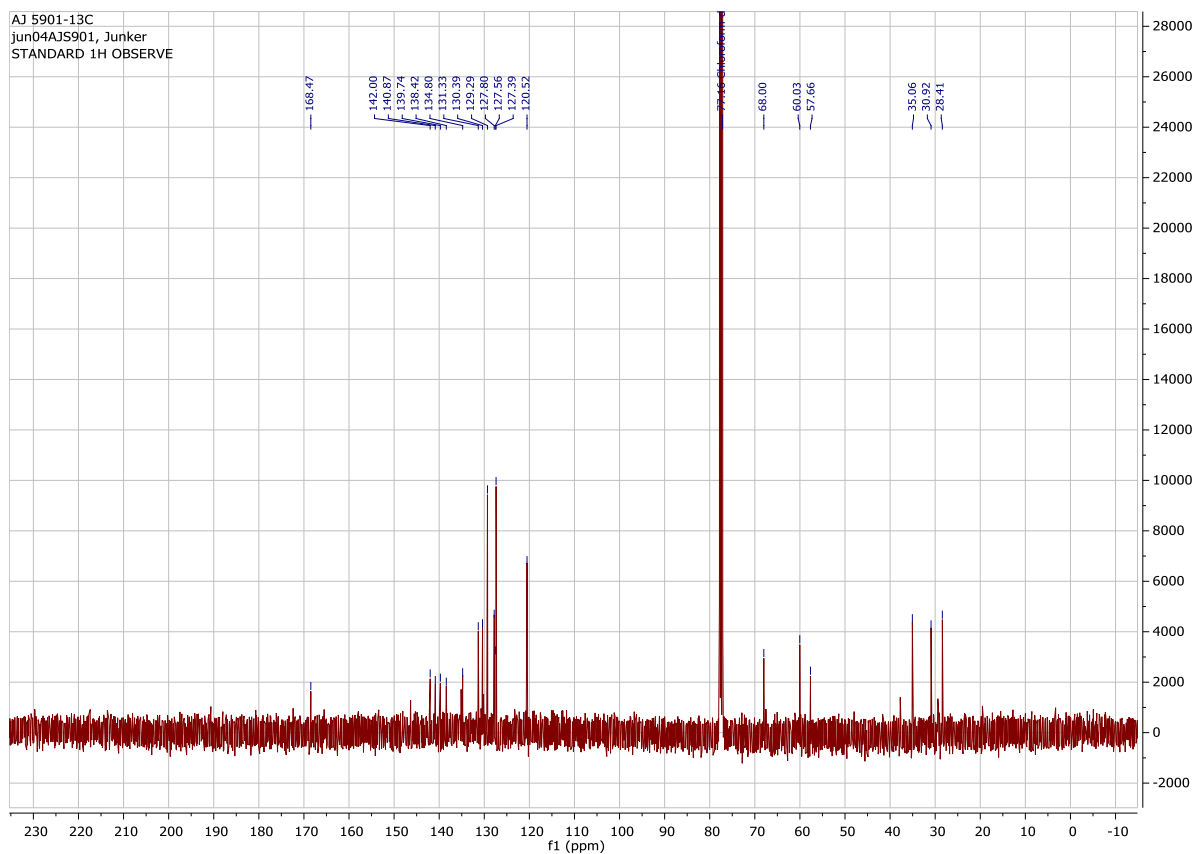

# HPLC

Analyzed: 20.04.11 03:13

Reported: 20.04.11 14:14  
Processed: 20.04.11 14:14

Data Path: D:\WIN32APP\HSM\Chromni\DATA\2992\

Application: Chromni

Series: 2992

Sample Name: AJ5901

Vial Number: 12

Injection from this vial: 1 of 1

Vial Type: UNK

Volume: 5,0 ul

Chrom Type: HPLC Channel : 1

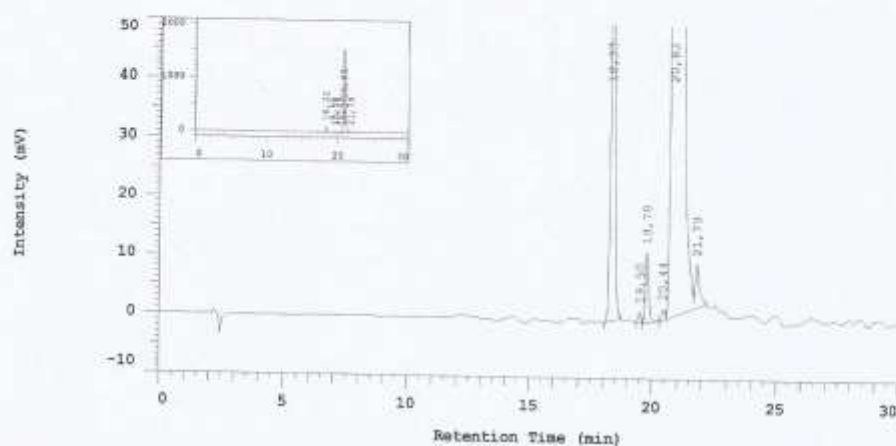

Acquisition Method: Chromni

Blank Subtr Sample Name: ACN

Column Type: 010

Solvent A: Wasser + 0,05%TFA

Developed by: Jens

Solvent B: ACN + 0,05%TFA

| No. | RT    | Area     | Conc 1  | BC |
|-----|-------|----------|---------|----|
| 1   | 18,33 | 949394   | 3,832   | BB |
| 2   | 19,50 | 12954    | 0,052   | BB |
| 3   | 19,78 | 107892   | 0,435   | BB |
| 4   | 20,44 | 13457    | 0,054   | MC |
| 5   | 20,83 | 23602756 | 95,260  | MC |
| 6   | 21,79 | 90764    | 0,366   | MC |
|     |       | 24777217 | 100,000 |    |

Peak rejection level: 0



## Generic Display Report

## Analysis Info

Analysis Name D:\Data\PMCI\PharmChemie\Routine\2011\_5\WJU\_AJ5901.d  
Method APCI\_directprobe\_default.m  
Sample Name AJ5901  
Comment Junker  
APCI-Direkt  
Kalibration mit Fettsaeureestern

Acquisition Date 5/2/2011 2:35:53 PM

Operator Meiners  
Instrument micrOTOF-Q II

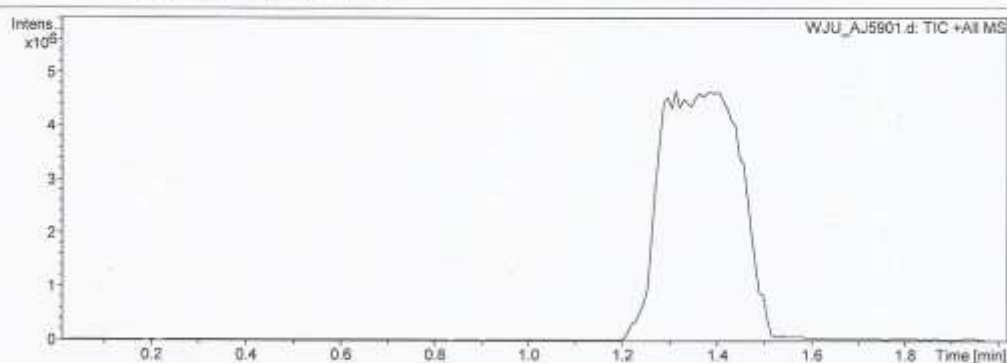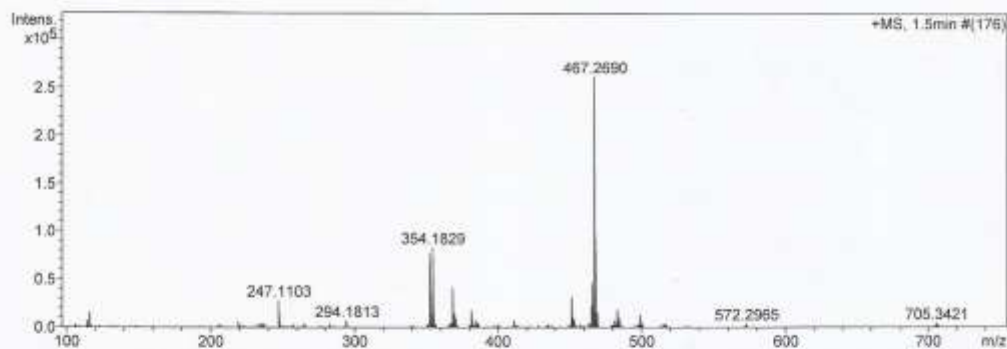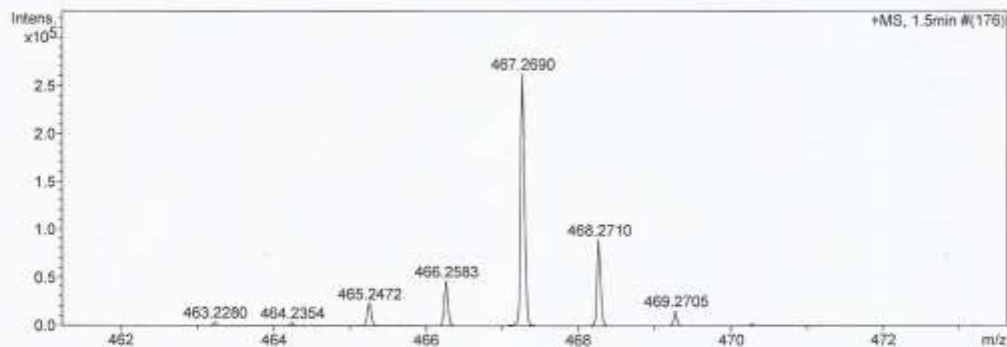

# Mass Spectrum SmartFormula Report

## Analysis Info

Analysis Name D:\Data\IPMC\PharmChemie\Routine\2011\_5\WJU\_AJ5901.d  
 Method APCI\_directprobe\_default.m  
 Sample Name AJ5901  
 Comment Junker  
 APCI-Direkt  
 Kalibration mit Fettsaeureestern

Acquisition Date 5/2/2011 2:35:53 PM

Operator Meiners

Instrument / Ser# microTOF-Q II 10252

## Acquisition Parameter

|             |            |                       |           |                  |           |
|-------------|------------|-----------------------|-----------|------------------|-----------|
| Source Type | APCI       | Ion Polarity          | Positive  | Set Nebulizer    | 0.7 Bar   |
| Focus       | Not active | Set Capillary         | 4000 V    | Set Dry Heater   | 200 °C    |
| Scan Begin  | 100 m/z    | Set End Plate Offset  | -500 V    | Set Dry Gas      | 3.0 l/min |
| Scan End    | 1000 m/z   | Set Collision Cell RF | 130.0 Vpp | Set Divert Valve | Waste     |

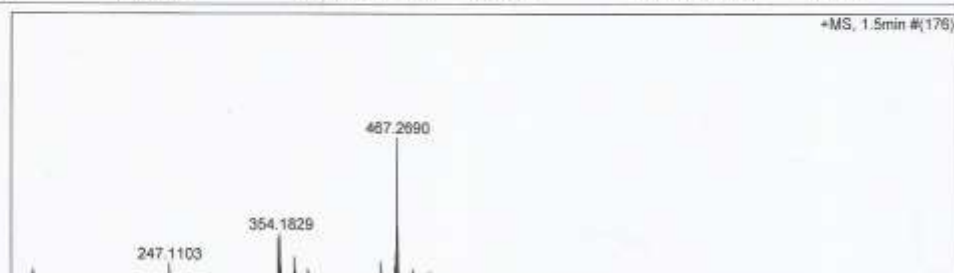

| Meas. m/z | # | Formula           | Score  | m/z      | err (mDa) | err (ppm) | mSigma | rdB  | e <sup>-</sup> Conf | N-Rule |
|-----------|---|-------------------|--------|----------|-----------|-----------|--------|------|---------------------|--------|
| 467.2690  | 1 | C 31 H 35 N 2 O 2 | 100.00 | 467.2693 | 0.3       | 0.6       | 2.0    | 15.5 | even                | ok     |
|           | 2 | C 27 H 31 N 8     | 22.03  | 467.2666 | -2.4      | -5.2      | 10.5   | 16.5 | even                | ok     |
|           | 3 | C 26 H 35 N 4 O 4 | 4.32   | 467.2653 | -3.7      | -8.0      | 25.5   | 11.5 | even                | ok     |

2-(3-Methyphenyl)-N- $\{[N$ -methyl-N-(tetrahydro-2H-pyran-4-yl)aminomethyl]phenyl}-6,7-dihydro-5H-benzo[7]annulene-8-carboxamide (**9b**)

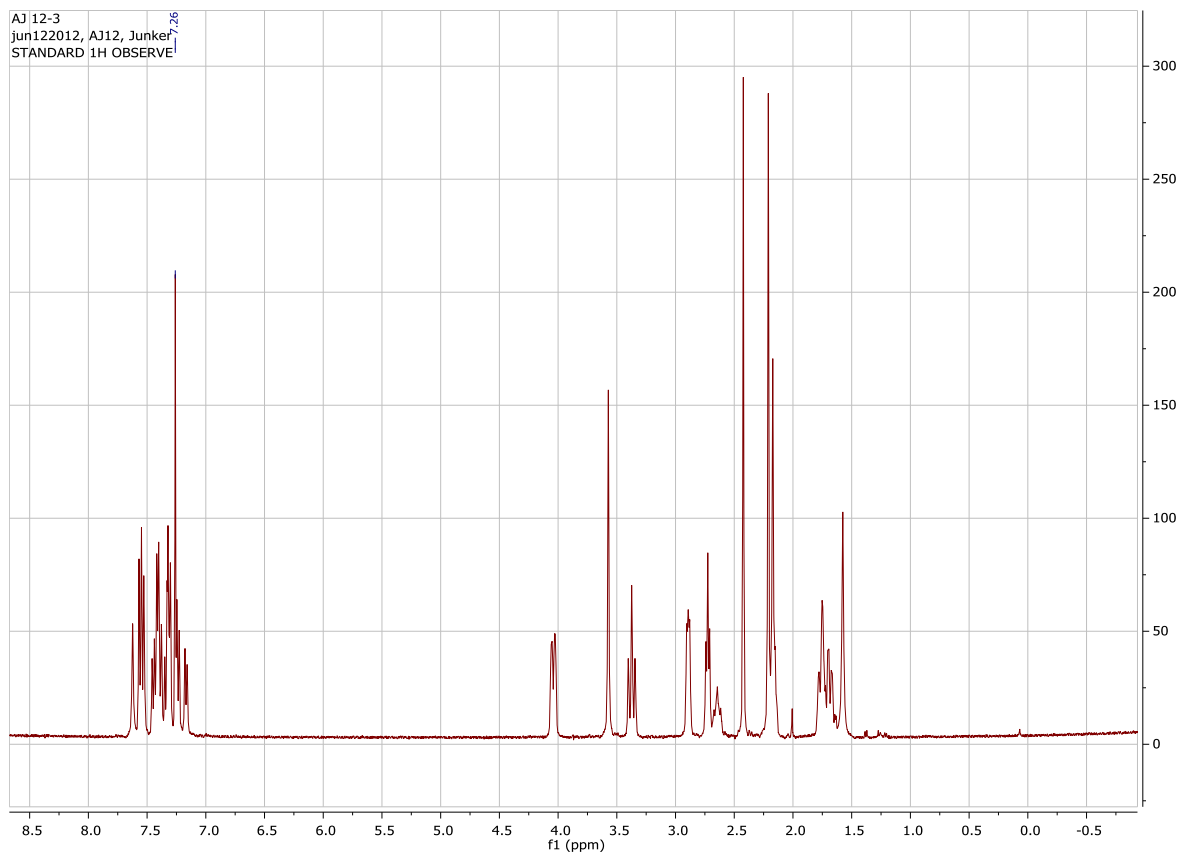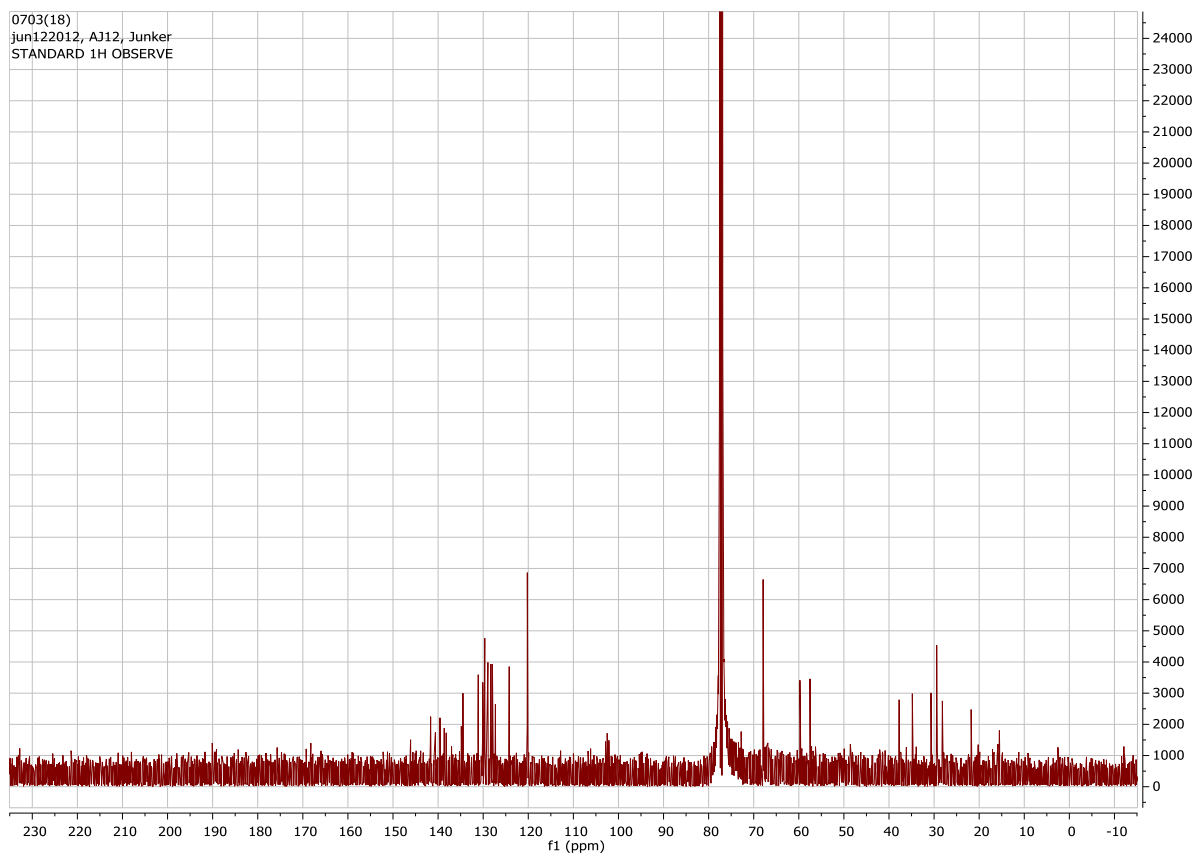

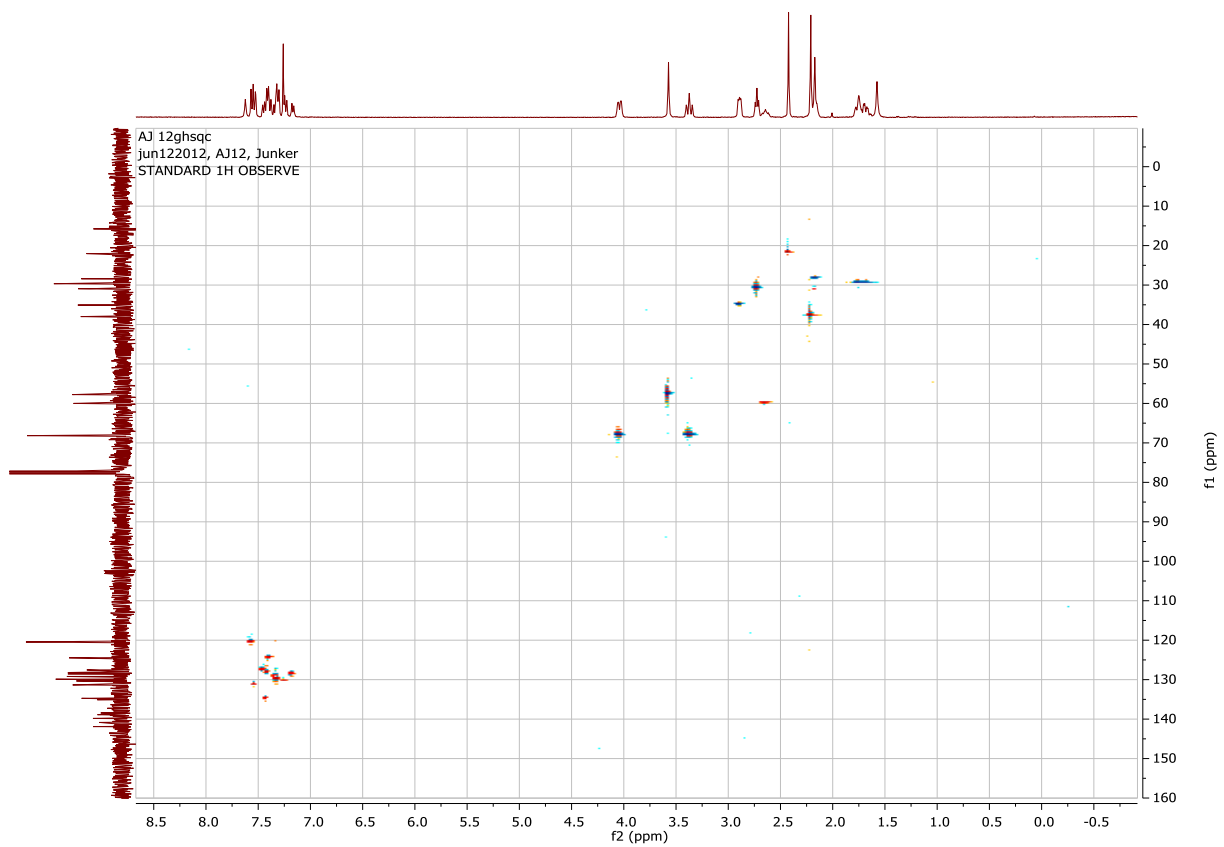

# HPLC

Analyzed: 01.09.10 22:12

Reported: 02.09.10 17:20

Processed: 02.09.10 17:20

Data Path: D:\WIN32APP\HSM\Chromni\DATA\2046\

Application: Chromni

Series: 2046

Sample Name: AJ1201

Vial Number: 6

Injection from this vial: 1 of 1

Vial Type: UNK

Volume: 5,0 ul

Chrom Type: HPLC Channel : 1

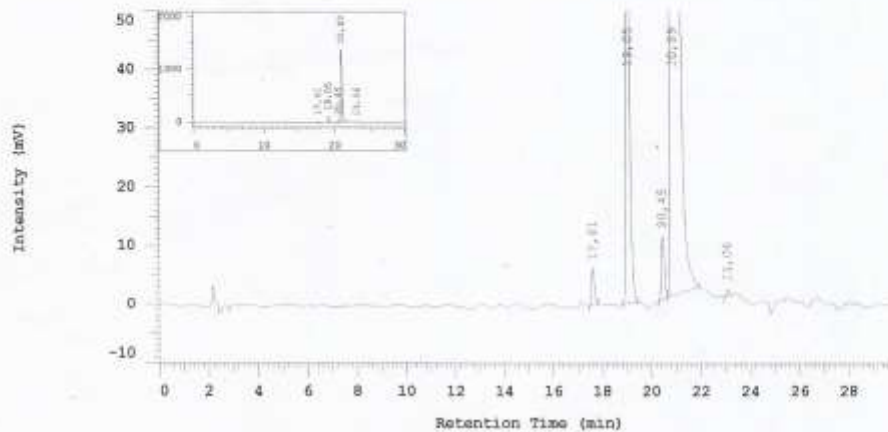

# Mass Spectrum SmartFormula Report

## Analysis Info

Analysis Name E:\Meiners\12\_09\WJU\_AJ12.d  
 Method APCI\_directprobe\_positiv.m  
 Sample Name AJ12  
 Comment Junker  
 APCI-Direkt  
 Kalibration mit Fettsaeureestern

Acquisition Date 9/7/2012 9:16:48 AM

Operator Sendker  
 Instrument / Ser# micrOTOF-Q II 10252

## Acquisition Parameter

|             |            |                       |           |                  |           |
|-------------|------------|-----------------------|-----------|------------------|-----------|
| Source Type | APCI       | Ion Polarity          | Positive  | Set Nebulizer    | 0.7 Bar   |
| Focus       | Not active | Set Capillary         | 4000 V    | Set Dry Heater   | 200 °C    |
| Scan Begin  | 100 m/z    | Set End Plate Offset  | -500 V    | Set Dry Gas      | 3.0 l/min |
| Scan End    | 1000 m/z   | Set Collision Cell RF | 130.0 Vpp | Set Divert Valve | Waste     |

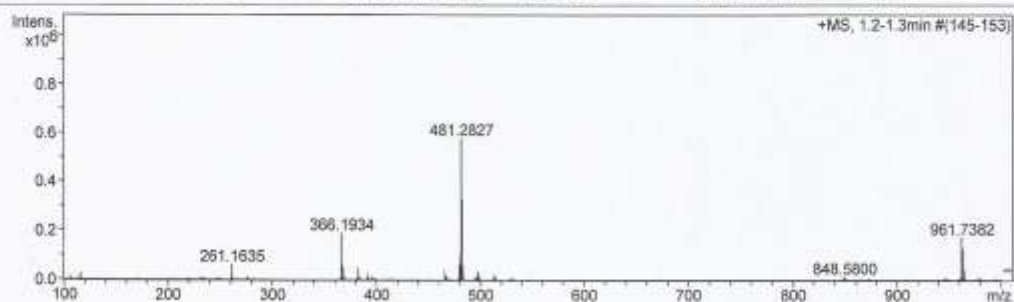

| Meas. m/z | #  | Formula                                                        | Score  | m/z      | err [mDa] | err [ppm] | mSigma | rdB  | e <sup>-</sup> Conf | N-Rule |
|-----------|----|----------------------------------------------------------------|--------|----------|-----------|-----------|--------|------|---------------------|--------|
| 481.2827  | 1  | C <sub>32</sub> H <sub>37</sub> N <sub>2</sub> O <sub>2</sub>  | 57.09  | 481.2850 | 2.2       | 4.7       | 102.4  | 15.5 | even                | ok     |
|           | 2  | C <sub>28</sub> H <sub>33</sub> N <sub>8</sub>                 | 100.00 | 481.2823 | -0.4      | -0.9      | 114.0  | 16.5 | even                | ok     |
|           | 3  | C <sub>27</sub> H <sub>37</sub> N <sub>4</sub> O <sub>4</sub>  | 23.08  | 481.2809 | -1.8      | -3.7      | 126.3  | 11.5 | even                | ok     |
|           | 4  | C <sub>26</sub> H <sub>41</sub> O <sub>8</sub>                 | 3.54   | 481.2796 | -3.1      | -6.5      | 138.7  | 6.5  | even                | ok     |
|           | 5  | C <sub>23</sub> H <sub>33</sub> N <sub>10</sub> O <sub>2</sub> | 0.20   | 481.2782 | -4.5      | -9.3      | 159.2  | 12.5 | even                | ok     |
|           | 6  | C <sub>20</sub> H <sub>41</sub> N <sub>4</sub> O <sub>9</sub>  | 0.22   | 481.2868 | 4.1       | 8.5       | 164.3  | 2.5  | even                | ok     |
|           | 7  | C <sub>17</sub> H <sub>33</sub> N <sub>14</sub> O <sub>3</sub> | 0.14   | 481.2855 | 2.7       | 5.7       | 188.9  | 8.5  | even                | ok     |
|           | 8  | C <sub>16</sub> H <sub>37</sub> N <sub>10</sub> O <sub>7</sub> | 0.13   | 481.2841 | 1.4       | 2.9       | 202.8  | 3.5  | even                | ok     |
|           | 9  | C <sub>13</sub> H <sub>29</sub> N <sub>20</sub> O              | 0.23   | 481.2828 | 0.1       | 0.1       | 204.5  | 9.5  | even                | ok     |
|           | 10 | C <sub>12</sub> H <sub>33</sub> N <sub>16</sub> O <sub>5</sub> | 0.04   | 481.2814 | -1.3      | -2.7      | 216.0  | 4.5  | even                | ok     |

## Generic Display Report

## Analysis Info

Analysis Name E:\Meiners\12\_09\WJU\_AJ12.d  
Method APCI\_directprobe\_positiv.m  
Sample Name AJ12  
Comment Junker  
APCI-Direkt  
Kalibration mit Fettsaeureestern

Acquisition Date 9/7/2012 9:16:48 AM

Operator Sendker  
Instrument micrOTOF-Q II

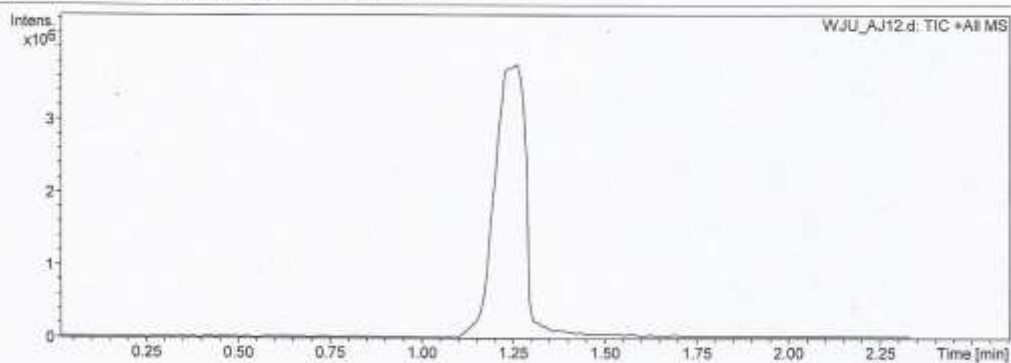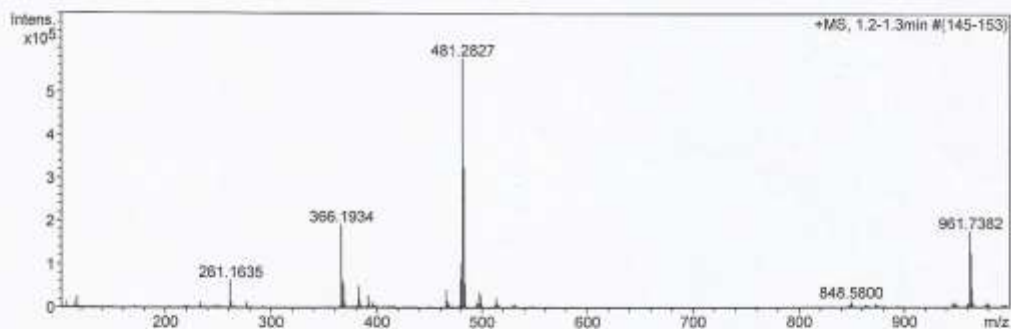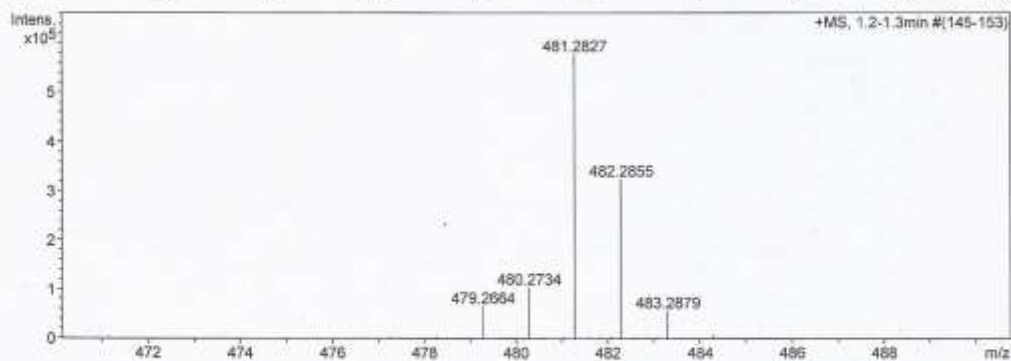

2-(2-Methyphenyl)-N-{4-[N-Methyl-N-(tetrahydro-2H-pyran-4-yl)aminomethyl]phenyl}-  
6,7-dihydro-5H-benzo[7]annulene-8-carboxamide (**9c**)

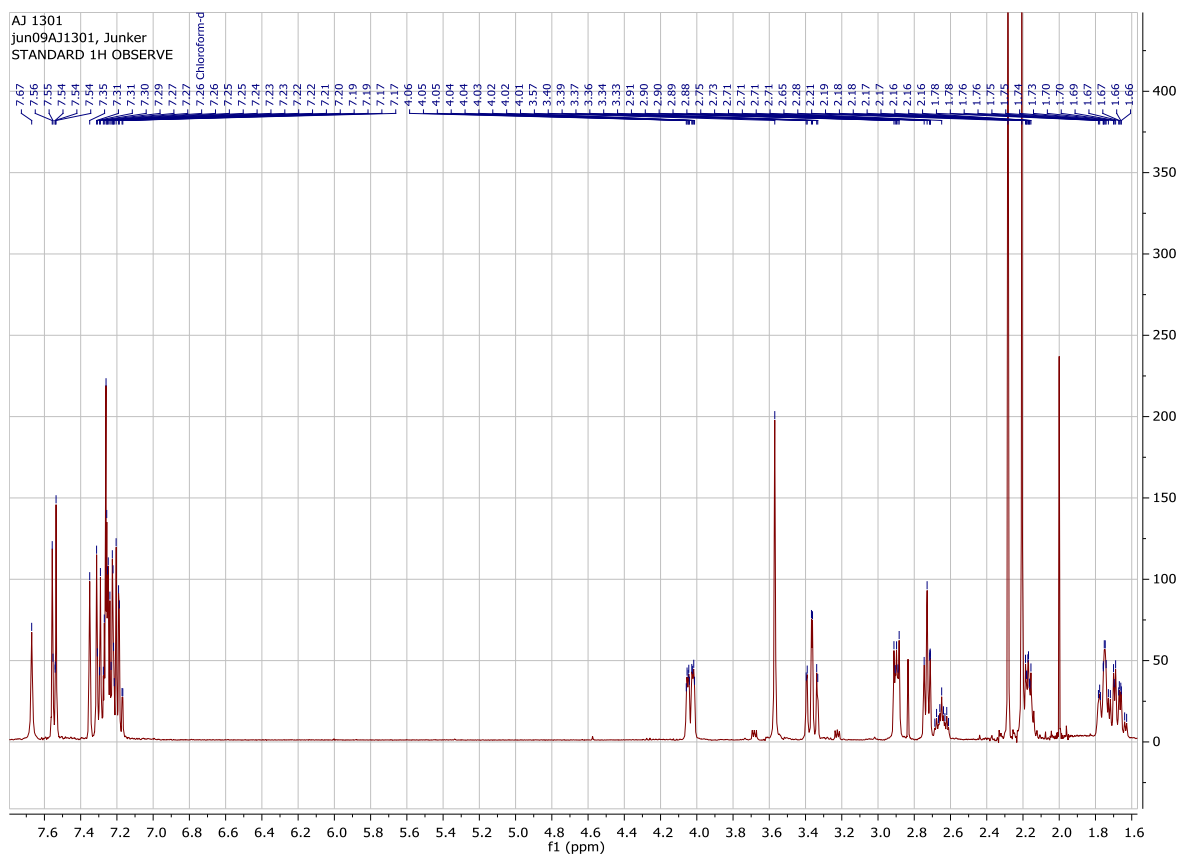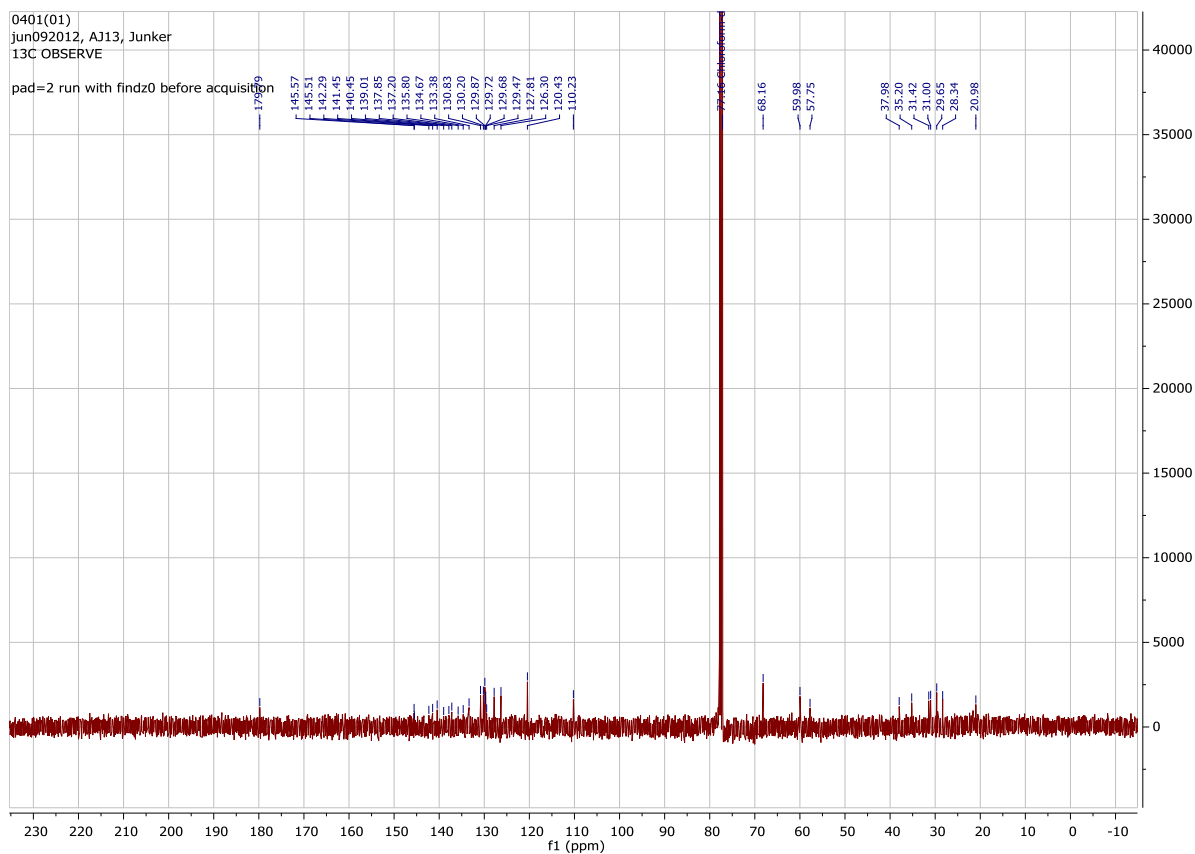



## HPLC

Analyzed: 21.10.10 03:58

Reported: 21.10.10 13:45  
Processed: 21.10.10 13:45

Data Path: D:\WIN32APP\HSM\Chromni\DATA\2286\

Application: Chromni

Series: 2286

Sample Name: AJ1301

Vial Number: 12

Injection from this vial: 1 of 1

Vial Type: UNK

Volume: 5,0 ul

Chrom Type: HPLC Channel : 1

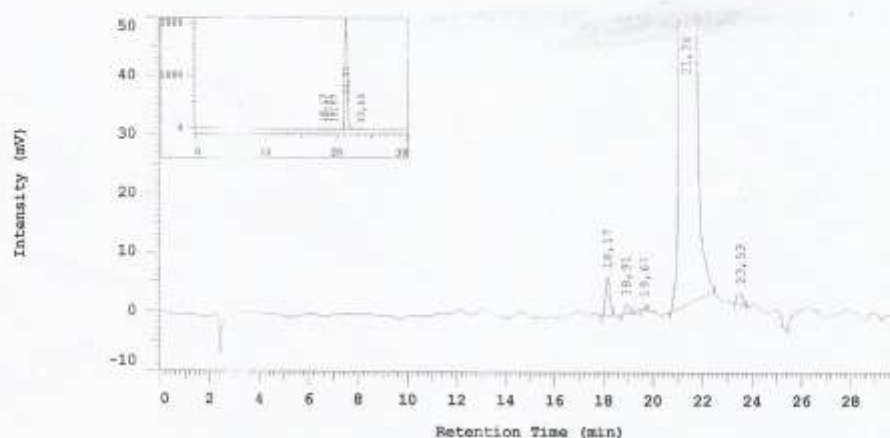

Acquisition Method: Chromni

Blank Subtr Sample Name: ACN

Column Type: 010

Developed by: Jens

Solvent A: Wasser + 0,05%TFA

Solvent B: ACN + 0,05%TFA

| No. | RT    | Area     | Conc 1  | BC |
|-----|-------|----------|---------|----|
| 1   | 18,17 | 76388    | 0,157   | MC |
| 2   | 18,91 | 20994    | 0,043   | MC |
| 3   | 19,67 | 6971     | 0,014   | BB |
| 4   | 21,34 | 48466825 | 99,725  | MC |
| 5   | 23,53 | 29471    | 0,061   | MC |
|     |       | 48600649 | 100,000 |    |

Peak rejection level: 0

## Generic Display Report

## Analysis Info

Analysis Name D:\Data\PMC\PharmChemie\Routine\APCI\12\_09\WJU\_AJ13.d  
Method APCI\_directprobe\_positiv.m  
Sample Name AJ13  
Comment Junker  
APCI-Direkt  
Kalibration mit Fettsaeureestern

Acquisition Date 9/10/2012 8:30:48 AM

Operator Sendker

Instrument microTOF-Q II

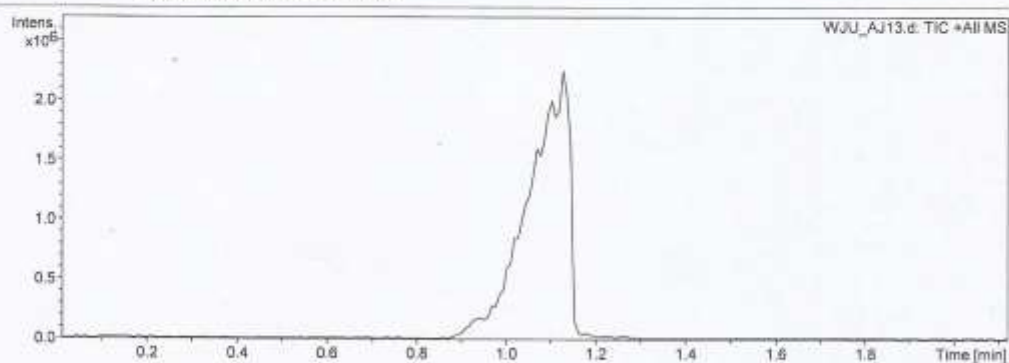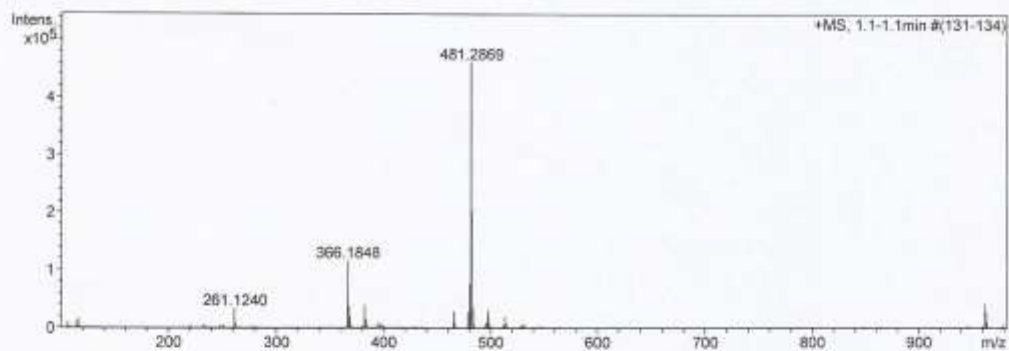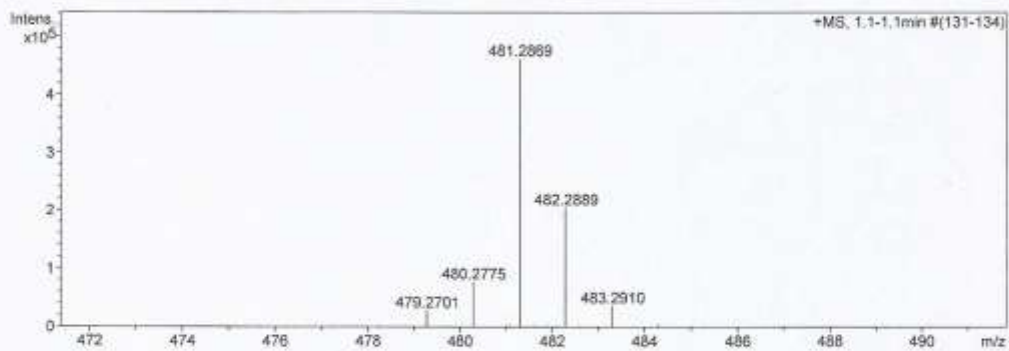

# Mass Spectrum SmartFormula Report

## Analysis Info

Analysis Name D:\Data\PMCI\PharmChemie\Routine\APCI\12\_09\WJU\_AJ13.d  
 Method APCI\_directprobe\_positiv.m  
 Sample Name AJ13  
 Comment Junker  
 APCI-Direkt  
 Kalibration mit Fettsaeureestern

Acquisition Date 9/10/2012 8:30:48 AM

Operator Sendker

Instrument / Ser# micrOTOF-Q II 10252

## Acquisition Parameter

|             |            |                       |           |                  |           |
|-------------|------------|-----------------------|-----------|------------------|-----------|
| Source Type | APCI       | Ion Polarity          | Positive  | Set Nebulizer    | 0.7 Bar   |
| Focus       | Not active | Set Capillary         | 4000 V    | Set Dry Heater   | 200 °C    |
| Scan Begin  | 100 m/z    | Set End Plate Offset  | -500 V    | Set Dry Gas      | 3.0 l/min |
| Scan End    | 1000 m/z   | Set Collision Cell RF | 130.0 Vpp | Set Divert Valve | Waste     |

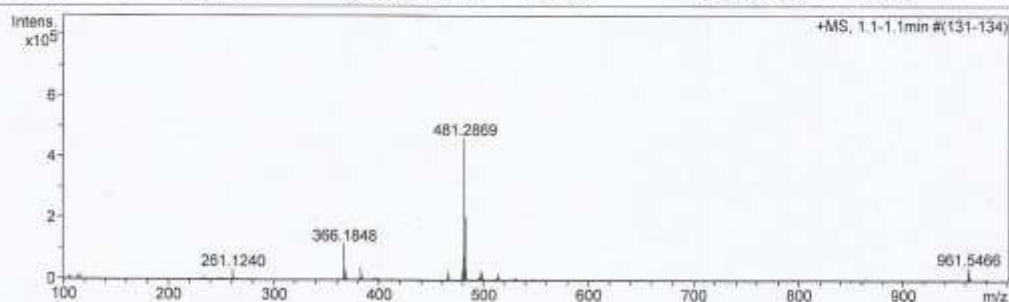

| Meas. m/z | # | Formula            | Score  | m/z      | err [mDa] | err [ppm] | mSigma | rdB  | e <sup>-</sup> Conf | N-Rule |
|-----------|---|--------------------|--------|----------|-----------|-----------|--------|------|---------------------|--------|
| 481.2869  | 1 | C 37 H 37          | 100.00 | 481.2890 | 2.1       | 4.3       | 18.7   | 19.5 | even                | ok     |
|           | 2 | C 32 H 37 N 2 O 2  | 61.61  | 481.2850 | -2.0      | -4.1      | 42.2   | 15.5 | even                | ok     |
|           | 3 | C 25 H 41 N 2 O 7  | 2.53   | 481.2908 | 3.9       | 8.1       | 80.4   | 6.5  | even                | ok     |
|           | 4 | C 22 H 33 N 12 O   | 6.04   | 481.2895 | 2.6       | 5.3       | 92.3   | 12.5 | even                | ok     |
|           | 5 | C 20 H 41 N 4 O 9  | 16.85  | 481.2868 | -0.1      | -0.2      | 104.1  | 2.5  | even                | ok     |
|           | 6 | C 21 H 37 N 8 O 5  | 8.55   | 481.2881 | 1.2       | 2.6       | 106.1  | 7.5  | even                | ok     |
|           | 7 | C 17 H 33 N 14 O 3 | 3.73   | 481.2855 | -1.4      | -3.0      | 119.4  | 8.5  | even                | ok     |
|           | 8 | C 16 H 37 N 10 O 7 | 0.59   | 481.2841 | -2.8      | -5.8      | 133.3  | 3.5  | even                | ok     |

2-(4-Ethylphenyl)-N-{4-[N-methyl-N-(tetrahydro-2H-pyran-4-yl)aminomethyl]phenyl}-6,7-dihydro-5H-benzo[7]annulene-8-carboxamide (**9d**)

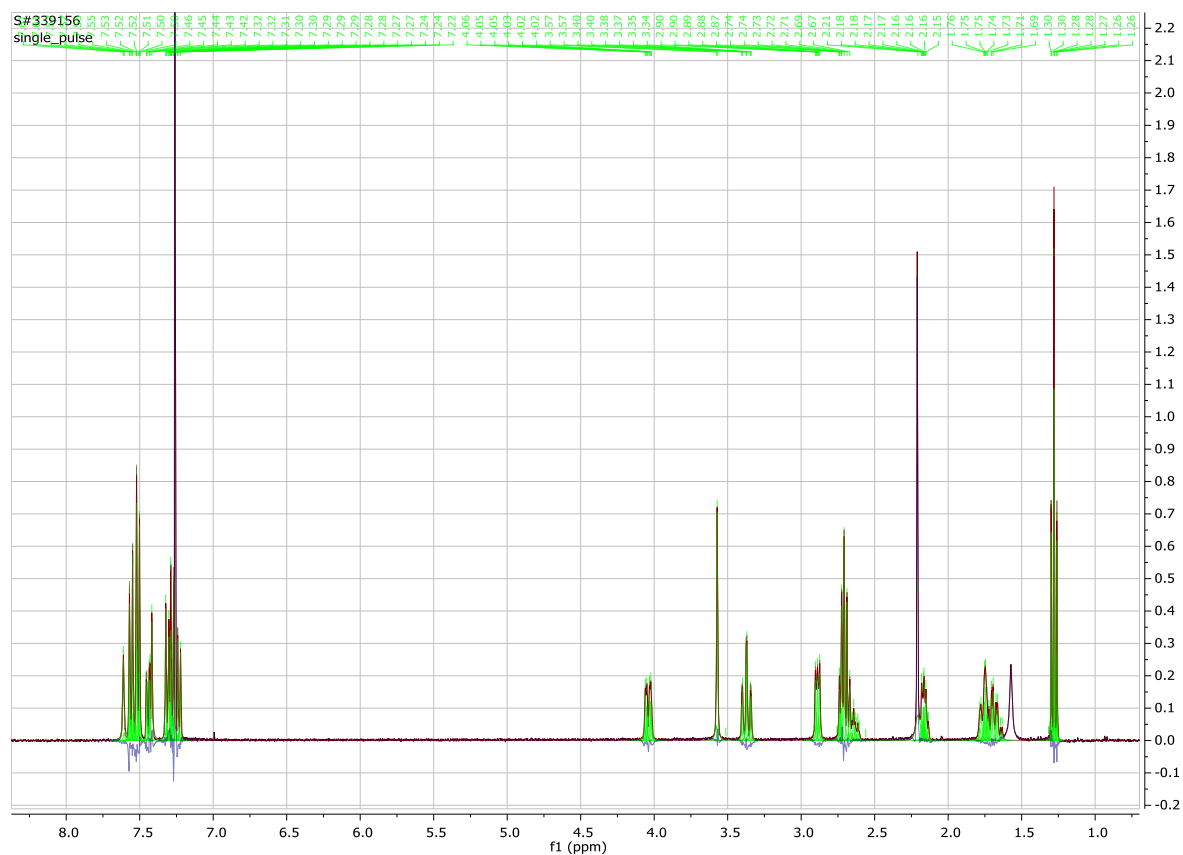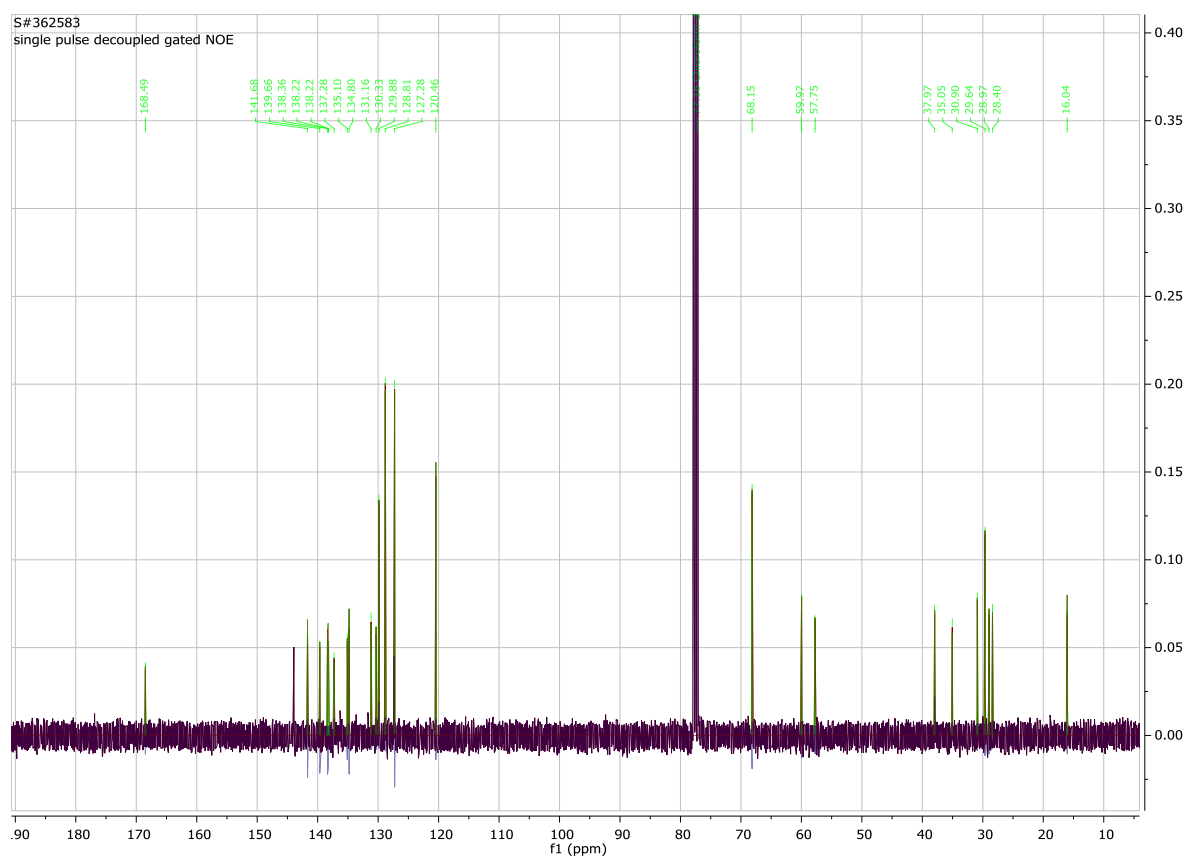

# HPLC

Analyzed: 05.07.12 03:21

Reported: 05.07.12 15:46  
Processed: 05.07.12 15:45

Data Path: D:\WIN32APP\HSM\Chromni\DATA\4971\

Application: Chromni

Series: 4971

Sample Name: AJ7501

Vial Number: 13

Injection from this vial: 1 of 1

Vial Type: UNK

Volume: 5,0 ul

Chrom Type: HPLC Channel : 1

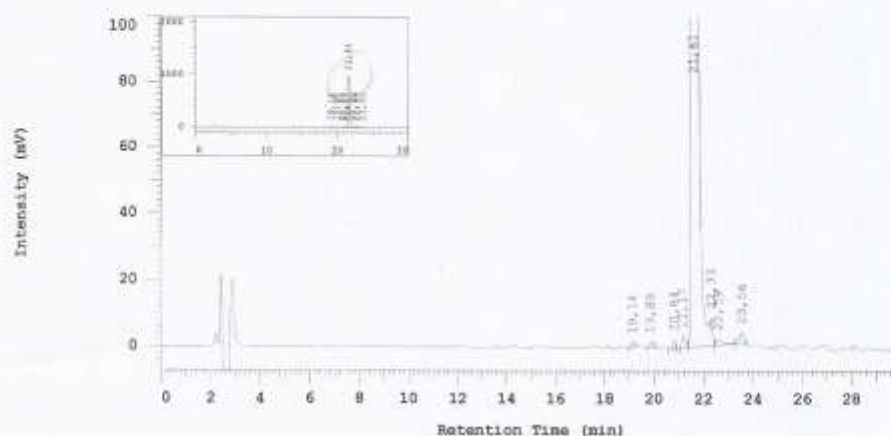

Acquisition Method: Chromni

Blank Subtr Sample Name: KG 97.1

Column Type: 010

Solvent A: Wasser + 0,05%TFA

Developed by: Jens

Solvent B: ACN + 0,05%TFA

| No. | RT    | Area     | Conc 1  | BC |
|-----|-------|----------|---------|----|
| 1   | 19,14 | 12781    | 0,106   | MC |
| 2   | 19,88 | 14479    | 0,121   | BB |
| 3   | 20,84 | 19943    | 0,166   | MC |
| 4   | 21,17 | 34405    | 0,287   | MC |
| 5   | 21,61 | 11771381 | 98,081  | MC |
| 6   | 22,33 | 66843    | 0,557   | MC |
| 7   | 22,59 | 35122    | 0,293   | MC |
| 8   | 23,56 | 46779    | 0,390   | MC |
|     |       | 12001733 | 100,000 |    |

Peak rejection level: 0

495.3012

0.8 mDa

## Generic Display Report

## Analysis Info

Analysis Name D:\Data\IPMC\PharmChemie\Routine\APCI\12\_08\WJU\_AJ7501.d  
Method APCI\_directprobe\_positiv.m  
Sample Name AJ7501  
Comment Junker  
APCI-Direkt  
Kalibration mit Fettsaeureestern

Acquisition Date 8/2/2012 9:37:48 AM

Operator Meiners  
Instrument micrOTOF-Q II

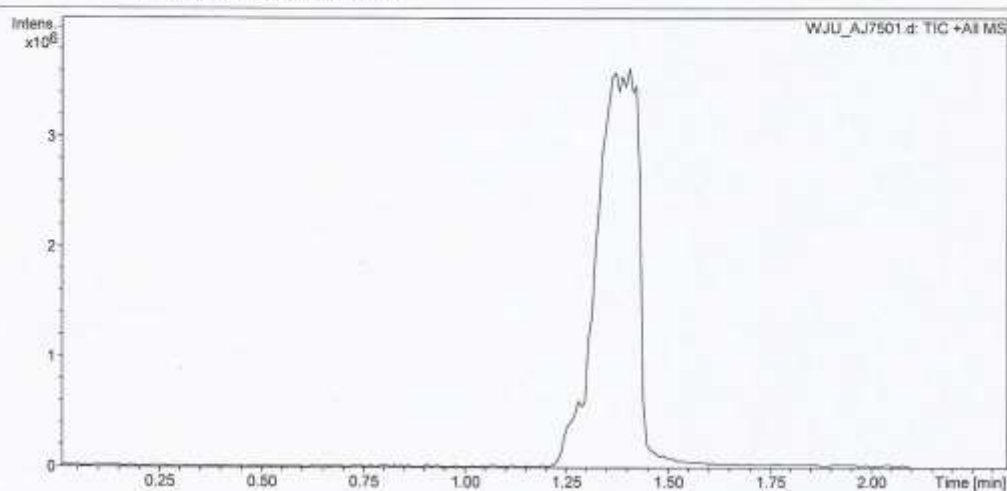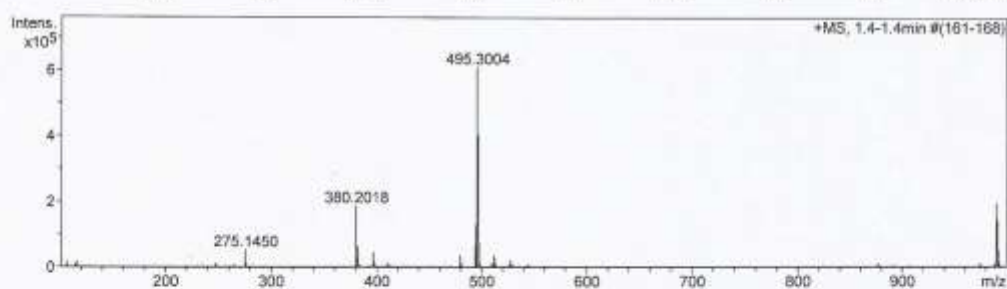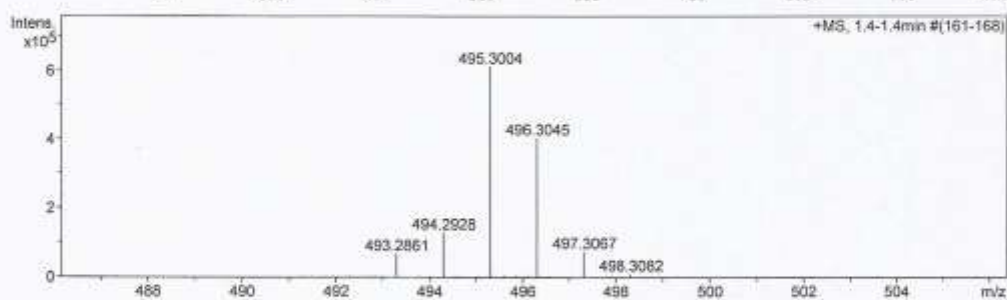

# Mass Spectrum SmartFormula Report

## Analysis Info

Analysis Name: D:\Data\PMC\PharmChemie\Routine\APCI\12\_08\WJU\_AJ7501.d  
 Method: APCI\_directprobe\_positiv.m  
 Sample Name: AJ7501  
 Comment: Junker  
 APCI-Direkt  
 Kalibration mit Fettsaeureestern

Acquisition Date: 8/2/2012 9:37:48 AM

Operator: Meiners

Instrument / Ser#: micrOTOF-Q II 10252

## Acquisition Parameter

Source Type: APCI  
 Focus: Not active  
 Scan Begin: 100 m/z  
 Scan End: 1000 m/z  
 Ion Polarity: Positive  
 Set Capillary: 4000 V  
 Set End Plate Offset: -500 V  
 Set Collision Cell RF: 130.0 Vpp  
 Set Nebulizer: 0.7 Bar  
 Set Dry Heater: 200 °C  
 Set Dry Gas: 3.0 l/min  
 Set Divert Valve: Waste

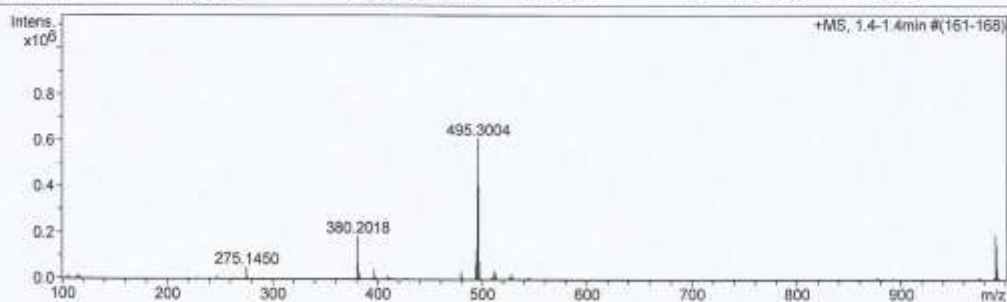

| Meas. m/z | # | Formula                                                        | Score  | m/z      | err [mDa] | err [ppm] | mSigma | rdB  | e <sup>-</sup> | Conf | N-Rule |
|-----------|---|----------------------------------------------------------------|--------|----------|-----------|-----------|--------|------|----------------|------|--------|
| 495.3004  | 1 | C <sub>33</sub> H <sub>39</sub> N <sub>2</sub> O <sub>2</sub>  | 100.00 | 495.3006 | 0.2       | 0.4       | 147.0  | 15.5 | even           |      | ok     |
|           | 2 | C <sub>29</sub> H <sub>35</sub> N <sub>8</sub>                 | 10.59  | 495.2979 | -2.5      | -5.0      | 158.7  | 16.5 | even           |      | ok     |
|           | 3 | C <sub>28</sub> H <sub>39</sub> N <sub>4</sub> O <sub>4</sub>  | 1.15   | 495.2966 | -3.8      | -7.7      | 171.0  | 11.5 | even           |      | ok     |
|           | 4 | C <sub>21</sub> H <sub>43</sub> N <sub>4</sub> O <sub>9</sub>  | 0.29   | 495.3025 | 2.0       | 4.1       | 209.0  | 2.5  | even           |      | ok     |
|           | 5 | C <sub>22</sub> H <sub>39</sub> N <sub>8</sub> O <sub>5</sub>  | 0.02   | 495.3038 | 3.4       | 6.8       | 227.2  | 7.5  | even           |      | ok     |
|           | 6 | C <sub>18</sub> H <sub>35</sub> N <sub>14</sub> O <sub>3</sub> | 0.04   | 495.3011 | 0.7       | 1.4       | 240.6  | 8.5  | even           |      | ok     |
|           | 7 | C <sub>14</sub> H <sub>31</sub> N <sub>20</sub> O              | 0.00   | 495.2984 | -2.0      | -4.0      | 254.3  | 9.5  | even           |      | ok     |
|           | 8 | C <sub>17</sub> H <sub>39</sub> N <sub>10</sub> O <sub>7</sub> | 0.01   | 495.2998 | -0.6      | -1.3      | 254.5  | 3.5  | even           |      | ok     |
|           | 9 | C <sub>13</sub> H <sub>35</sub> N <sub>16</sub> O <sub>5</sub> | 0.00   | 495.2971 | -3.3      | -6.7      | 267.8  | 4.5  | even           |      | ok     |

2-(4-Butylphenyl)-N-{4-[N-methyl-N-(tetrahydro-2H-pyran-4-yl)aminomethyl]phenyl}-6,7-dihydro-5H-benzo[7]annulene-8-carboxamide (**9e**)

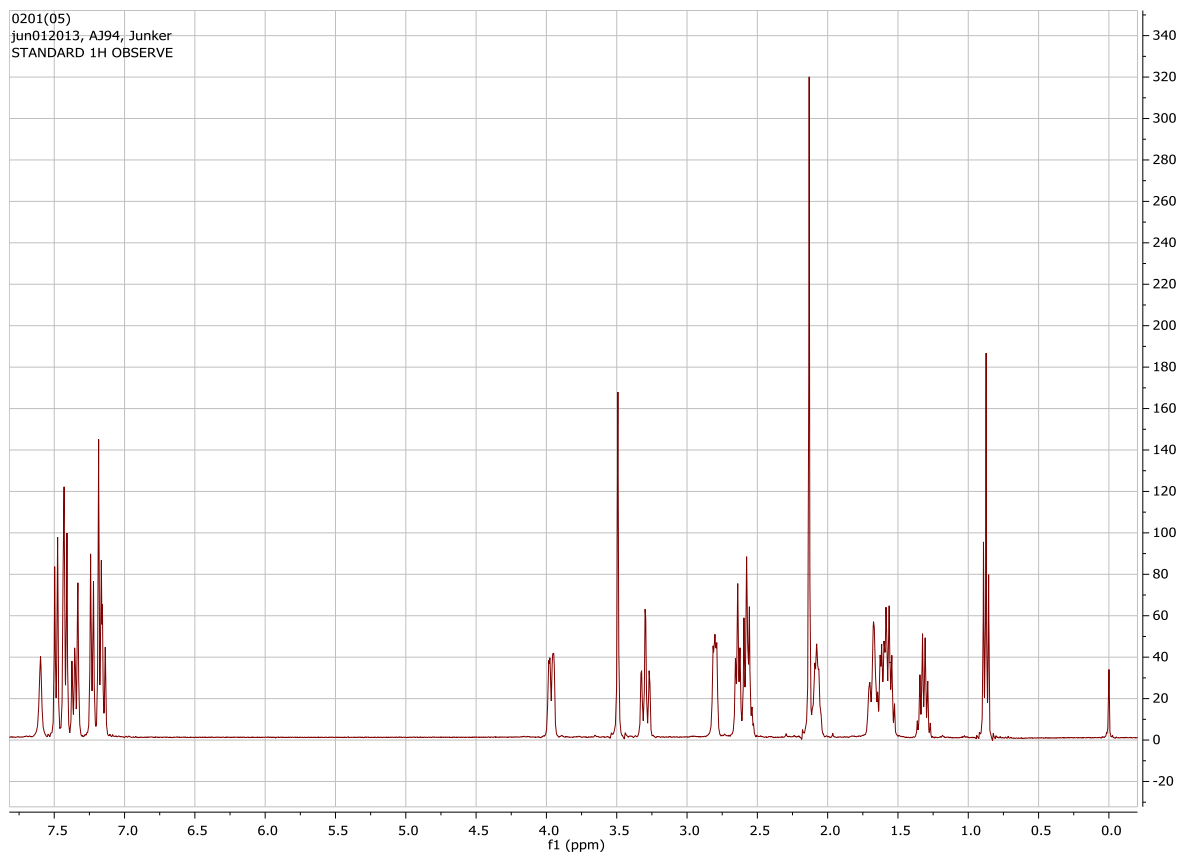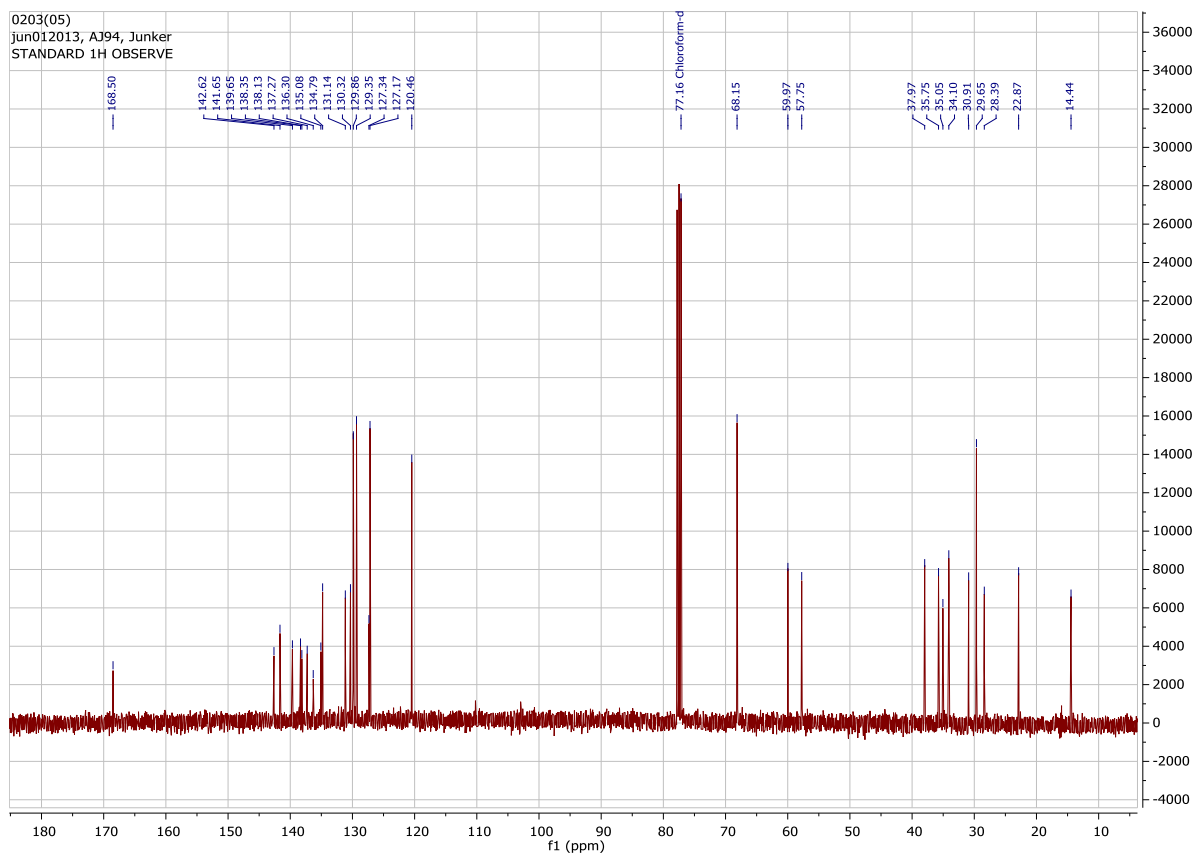



S77

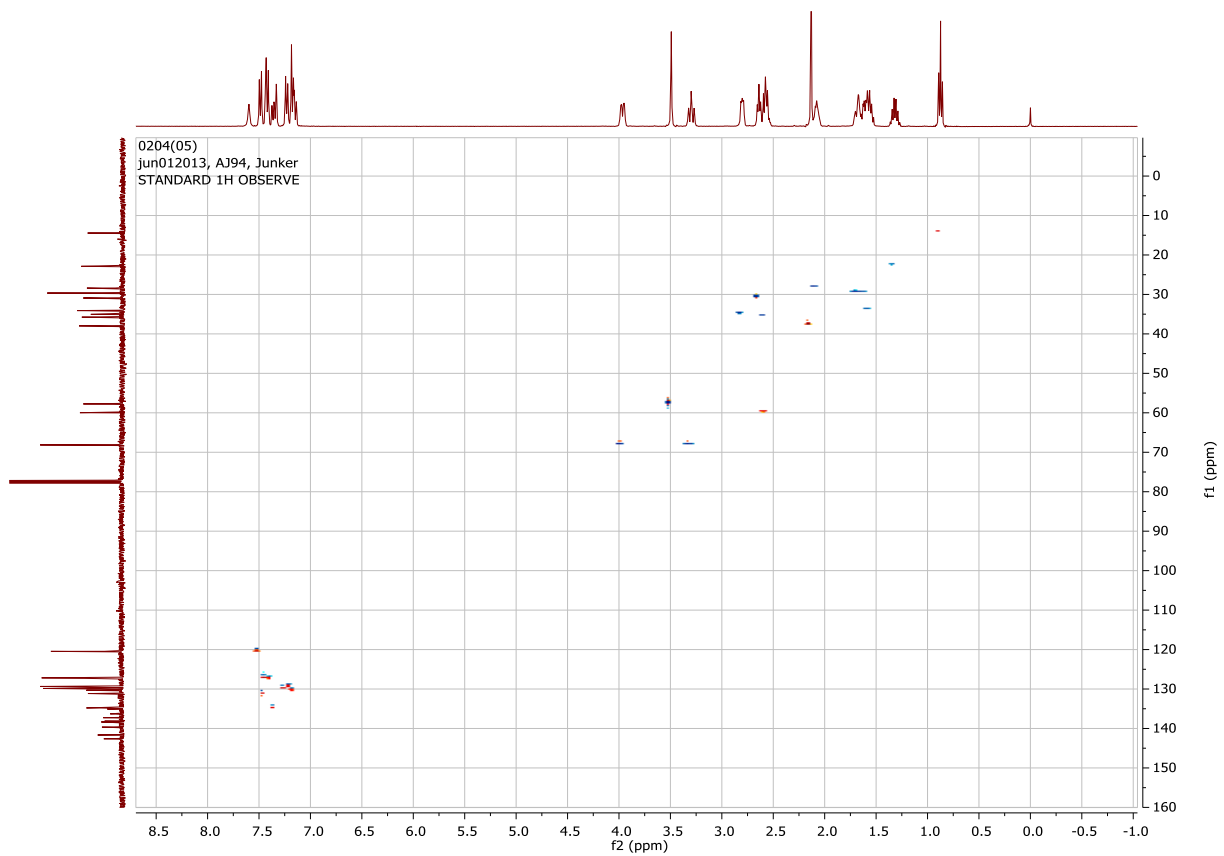

# HPLC

Analyzed: 05.07.12 09:34

Reported: 05.07.12 15:57

Processed: 05.07.12 15:57

Data Path: D:\WIN32APP\HSM\Chromni\DATA\4980\

Application: Chromni

Series: 4980

**Sample Name: AJ9401**

Vial Number: 20

Injection from this vial: 1 of 1

Vial Type: UNK

Volume: 5,0 ul

Chrom Type: HPLC Channel : 1

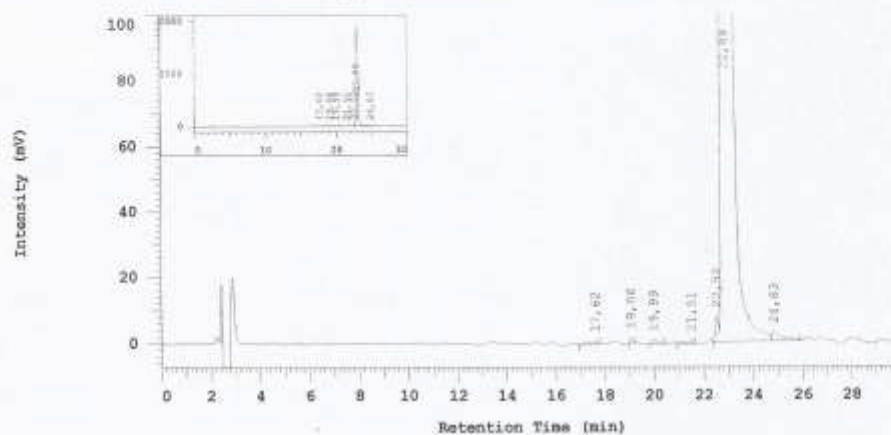

Acquisition Method: Chromni

Blank Subtr Sample Name: ACN

Column Type: 010

Solvent A: Wasser + 0,05%TFA

Developed by: Jens

Solvent B: ACN + 0,05%TFA

| No. | RT    | Area     | Conc 1  | BC |
|-----|-------|----------|---------|----|
| 1   | 17,62 | 18416    | 0,055   | MC |
| 2   | 19,06 | 14108    | 0,042   | MC |
| 3   | 19,99 | 16006    | 0,048   | MC |
| 4   | 21,51 | 17645    | 0,053   | MC |
| 5   | 22,52 | 63872    | 0,191   | MC |
| 6   | 22,89 | 33270307 | 99,395  | MC |
| 7   | 24,83 | 72535    | 0,217   | MC |
|     |       | 33472889 | 100,000 |    |

Peak rejection level: 0

## Generic Display Report

## Analysis Info

Analysis Name \\p2-msl\PZ\PharmChemie\Routine\APCI\12\_08\WJU\_AJ9401.d  
Method APCI\_directprobe\_positiv.m  
Sample Name AJ9401  
Comment Junker  
APCI-Direkt  
Kalibration mit Fettsaeureestern

Acquisition Date 02.08.2012 11:40:36

Operator Meiners  
Instrument micrOTOF-Q II

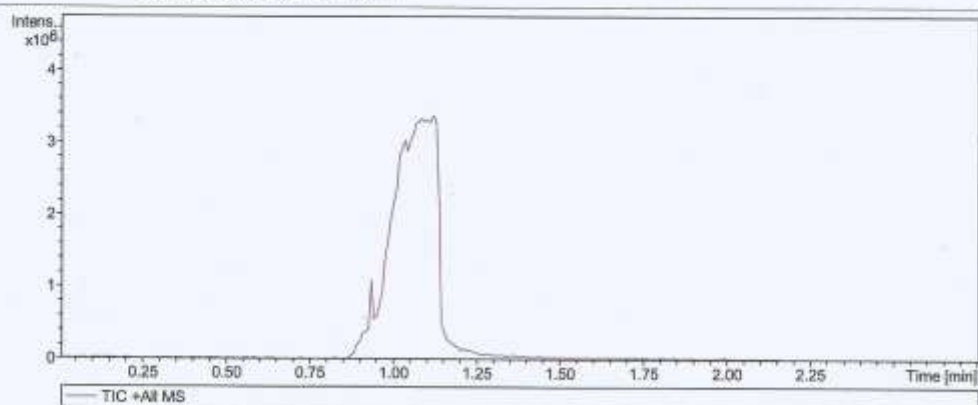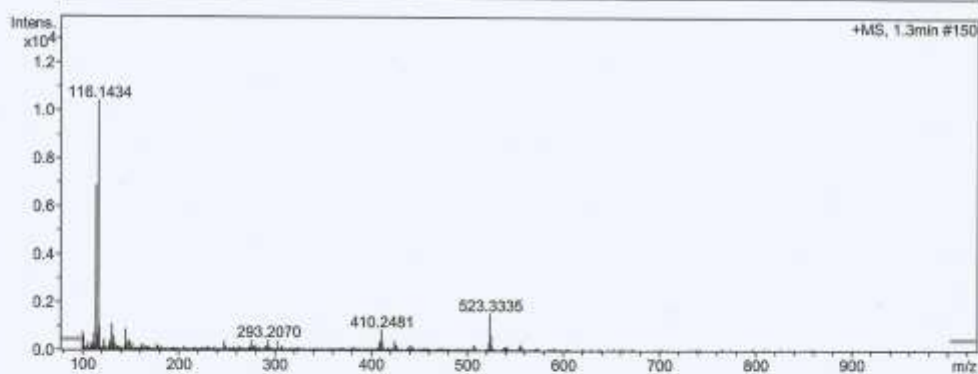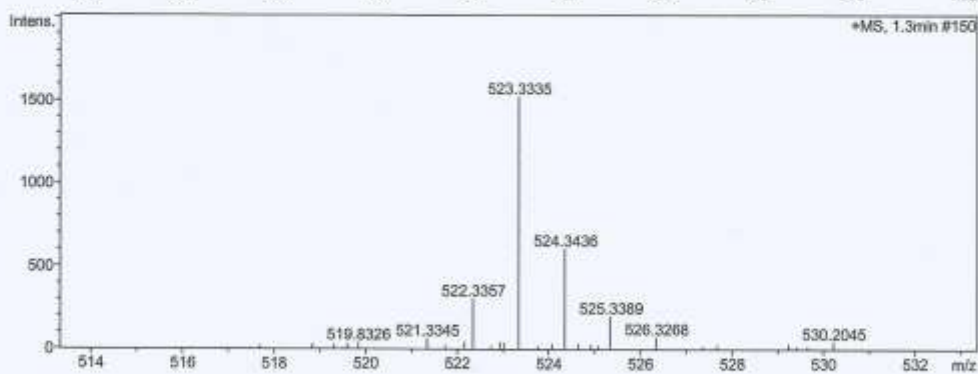

# Mass Spectrum SmartFormula Report

## Analysis Info

Analysis Name: \lpz-ms\VPZ\PharmChem\etRoutine\APCI\12\_08\WJU\_AJ9401.d  
 Method: APCI\_directprobe\_positiv.m  
 Sample Name: AJ9401  
 Comment: Junker  
 APCI-Direkt  
 Kalibration mit Fettsäureestern

Acquisition Date: 02.08.2012 11:40:36

Operator: Meiners  
 Instrument / Ser#: microTOF-Q II 10252

## Acquisition Parameter

|             |            |                       |           |                  |           |
|-------------|------------|-----------------------|-----------|------------------|-----------|
| Source Type | APCI       | Ion Polarity          | Positive  | Set Nebulizer    | 0.7 Bar   |
| Focus       | Not active | Set Capillary         | 4000 V    | Set Dry Heater   | 200 °C    |
| Scan Begin  | 100 m/z    | Set End Plate Offset  | -500 V    | Set Dry Gas      | 3.0 l/min |
| Scan End    | 1000 m/z   | Set Collision Cell RF | 130.0 Vpp | Set Divert Valve | Waste     |

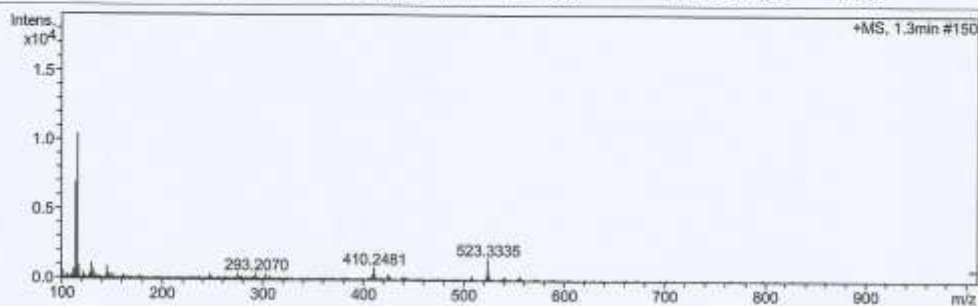

| Meas. m/z | # | Formula            | Score  | m/z      | err [mDa] | err [ppm] | mSigma | rdb  | s <sup>-</sup> | Conf | N-Rule |
|-----------|---|--------------------|--------|----------|-----------|-----------|--------|------|----------------|------|--------|
| 148.0563  | 1 | C 5 H 5 N 6        | 100.00 | 148.0570 | 0.7       | 4.6       | 14.0   | 6.5  | even           |      | ok     |
| 523.3335  | 1 | C 35 H 43 N 2 O 2  | 100.00 | 523.3319 | -1.6      | -3.1      | 30.4   | 15.5 | even           |      | ok     |
|           | 2 | C 40 H 43          | 54.46  | 523.3359 | 2.4       | 4.6       | 31.5   | 19.5 | even           |      | ok     |
|           | 3 | C 31 H 39 N 8      | 6.00   | 523.3292 | -4.3      | -8.3      | 38.7   | 16.5 | even           |      | ok     |
|           | 4 | C 28 H 47 N 2 O 7  | 4.11   | 523.3378 | 4.2       | 8.1       | 54.9   | 6.5  | even           |      | ok     |
| 525.3389  | 1 | C 26 H 41 N 10 O 2 | 58.82  | 525.3408 | 1.9       | 3.6       | 18.1   | 11.5 | even           |      | ok     |

2-(4-*tert*-Butylphenyl)N-{4-[N-methyl-N-(tetrahydro-2H-pyran-4-yl)aminomethyl]phenyl}-  
6,7-dihydro-5H-benzo[7]annulene-8-carboxamide (**9f**)

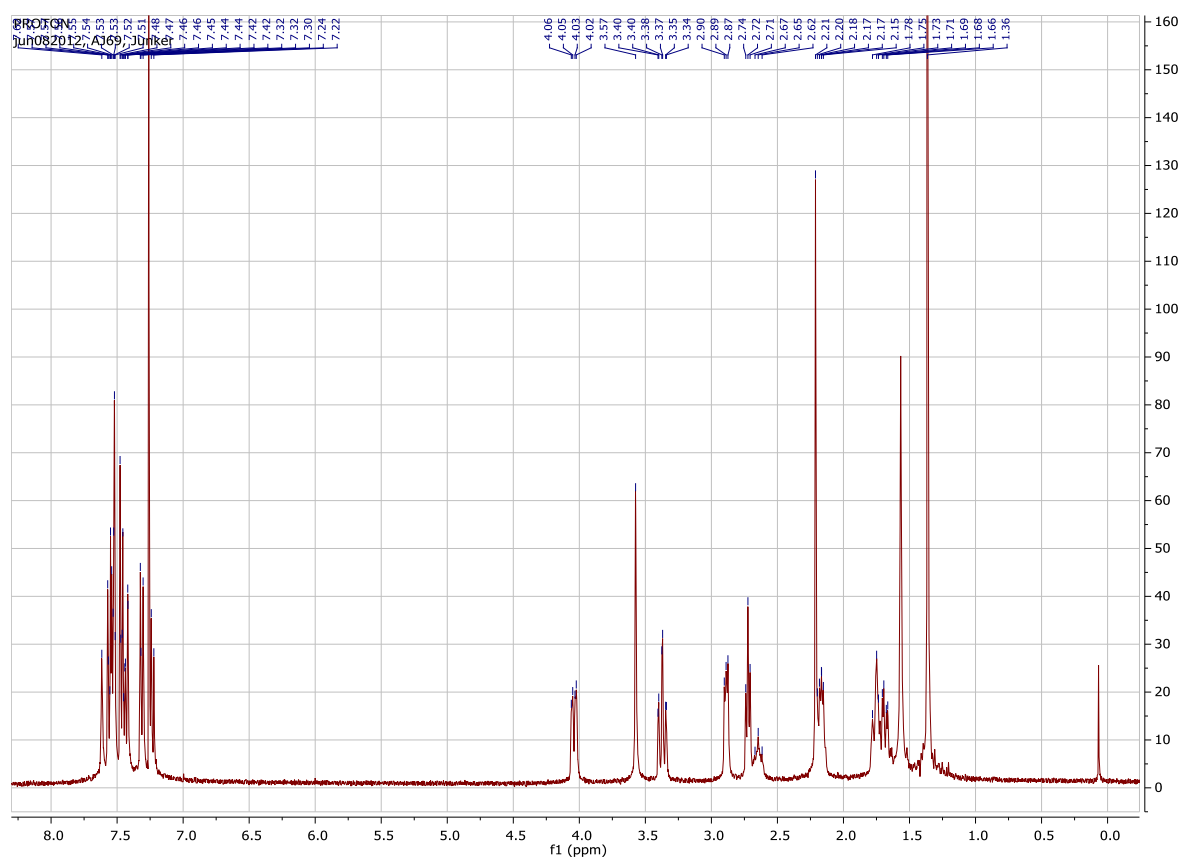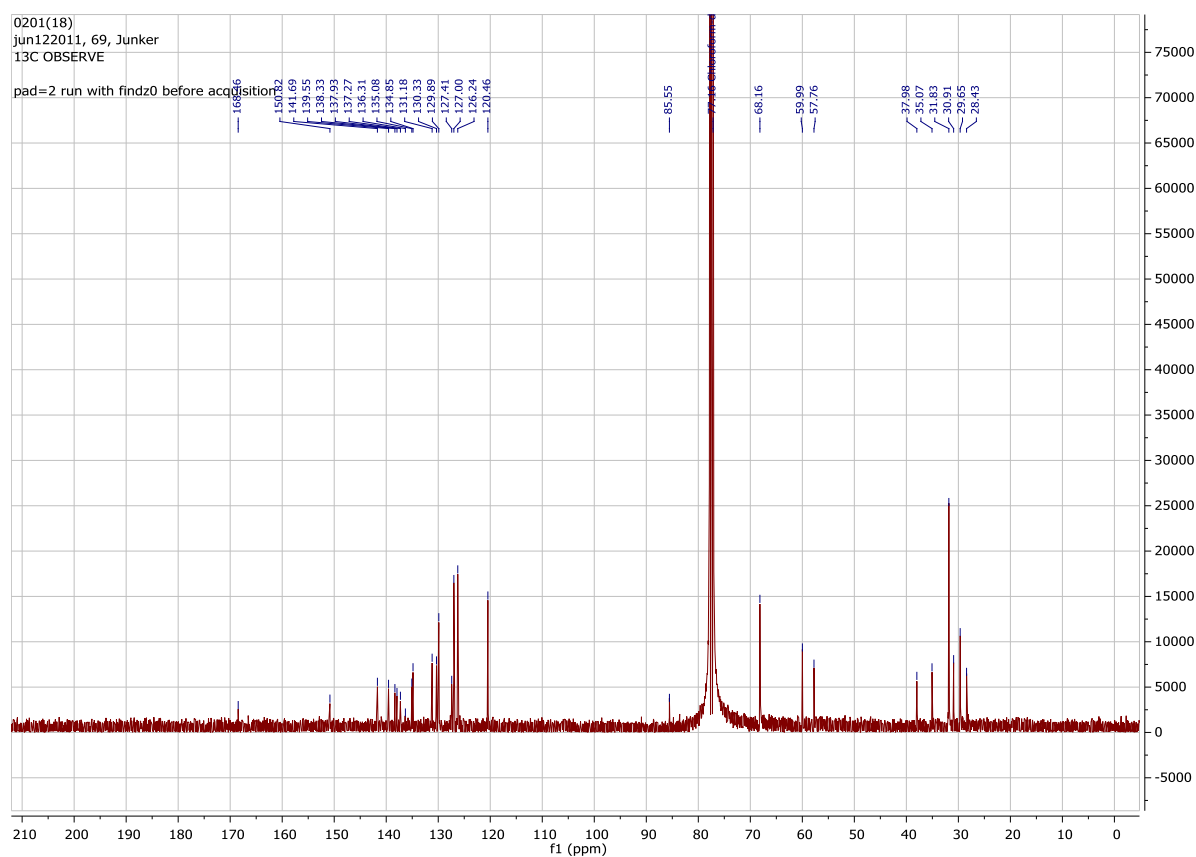

# HPLC

Analyzed: 11.08.11 01:52

Reported: 11.08.11 09:20  
Processed: 11.08.11 09:20Data Path: D:\WIN32APP\HSM\Chromni\DATA\3443\  
Application: ChromniSeries: 3443  
Vial Number: 12  
Vial Type: UNK  
Volume: 5,0 ul**Sample Name: AJ6902**

Injection from this vial: 1 of 1

Chrom Type: HPLC Channel : 1

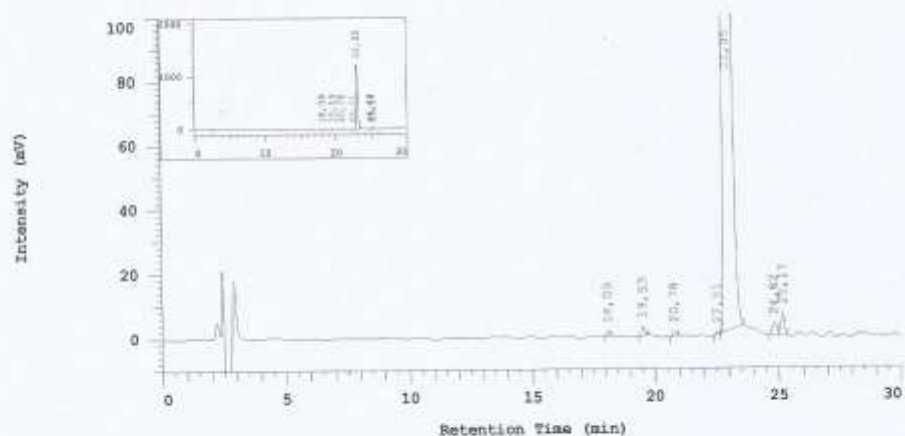

Acquisition Method: Chromni

Blank Subtr Sample Name: ACN

Column Type: 010

Solvent A: Wasser + 0,05%TFA

Developed by: Jens

Solvent B: ACN + 0,05%TFA

| No. | RT    | Area     | Conc 1  | BC |
|-----|-------|----------|---------|----|
| 1   | 18,09 | 10374    | 0,060   | BB |
| 2   | 19,53 | 26270    | 0,153   | BB |
| 3   | 20,78 | 14834    | 0,086   | BB |
| 4   | 22,51 | 5954     | 0,035   | MC |
| 5   | 22,95 | 17024297 | 99,002  | BB |
| 6   | 24,82 | 47769    | 0,278   | MC |
| 7   | 25,17 | 66435    | 0,386   | MC |
|     |       | 17195933 | 100,000 |    |

Peak rejection level: 0

## Generic Display Report

## Analysis Info

Analysis Name E:\Meiners\12\_09\WJU\_AJ6902.d  
Method APCI\_directprobe\_positiv.m  
Sample Name AJ6902  
Comment Junker  
APCI-Direkt  
Kalibration mit Fettsaeureestern

Acquisition Date 9/4/2012 11:32:37 AM

Operator Sendker  
Instrument micrOTOF-Q II

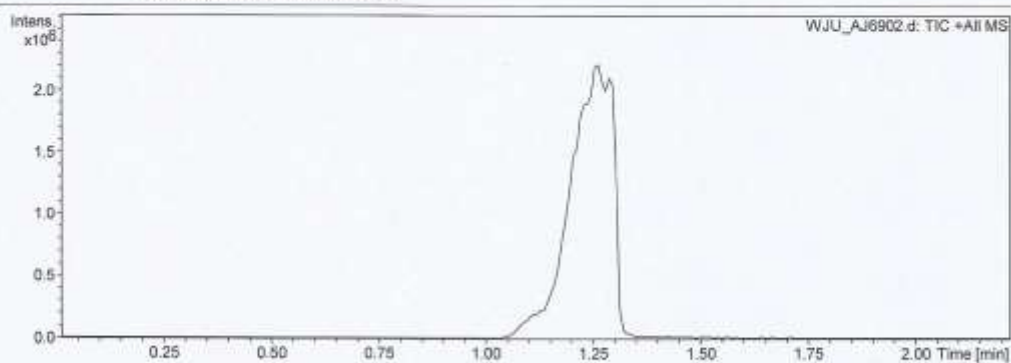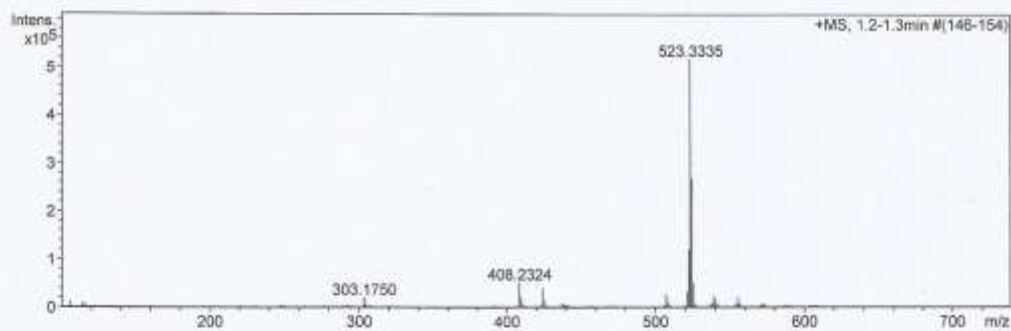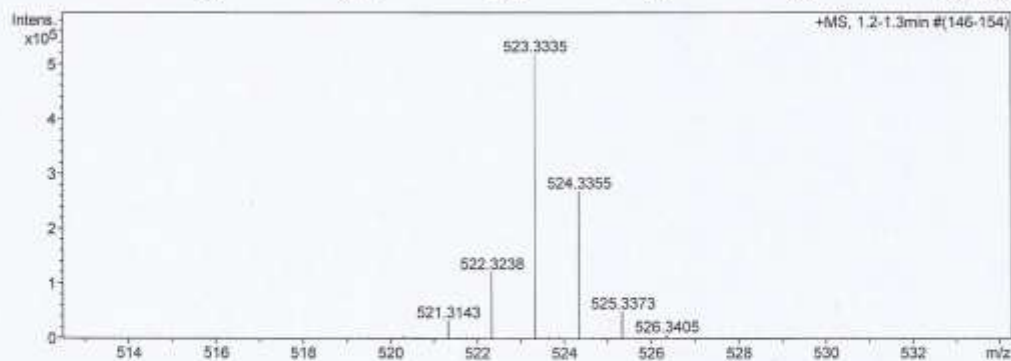

# Mass Spectrum SmartFormula Report

## Analysis Info

Analysis Name E:\Meiners\12\_09\WJU\_AJ6902.d  
 Method APCI\_directprobe\_positiv.m  
 Sample Name AJ6902  
 Comment Junker  
 APCI-Direkt  
 Kalibration mit Fettsaeureestern

Acquisition Date 9/4/2012 11:32:37 AM

Operator Sendker  
 Instrument / Ser# micrOTOF-Q II 10252

## Acquisition Parameter

|             |            |                       |           |                  |           |
|-------------|------------|-----------------------|-----------|------------------|-----------|
| Source Type | APCI       | Ion Polarity          | Positive  | Set Nebulizer    | 0.7 Bar   |
| Focus       | Not active | Set Capillary         | 4000 V    | Set Dry Heater   | 200 °C    |
| Scan Begin  | 100 m/z    | Set End Plate Offset  | -500 V    | Set Dry Gas      | 3.0 l/min |
| Scan End    | 1000 m/z   | Set Collision Cell RF | 130.0 Vpp | Set Divert Valve | Waste     |

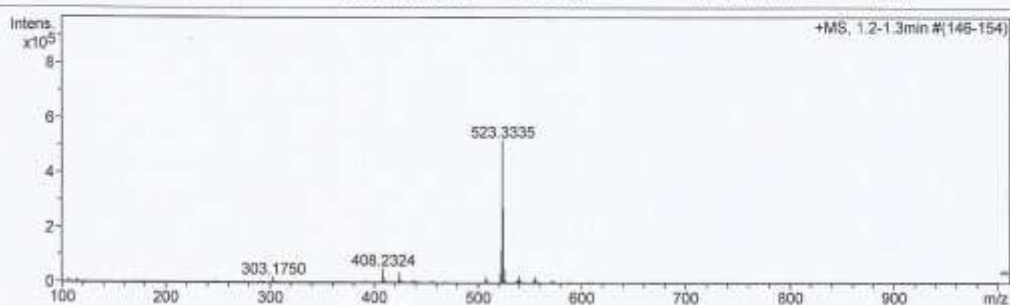

| Meas. m/z | #  | Formula            | Score  | m/z      | err [mDa] | err [ppm] | mSigma | rdB  | e <sup>-</sup> Conf | N-Rule |
|-----------|----|--------------------|--------|----------|-----------|-----------|--------|------|---------------------|--------|
| 523.3335  | 1  | C 40 H 43          | 100.00 | 523.3359 | 2.4       | 4.6       | 40.6   | 19.5 | even                | ok     |
|           | 2  | C 35 H 43 N 2 O 2  | 89.82  | 523.3319 | -1.6      | -3.0      | 64.4   | 15.5 | even                | ok     |
|           | 3  | C 31 H 39 N 8      | 4.44   | 523.3292 | -4.3      | -8.2      | 75.1   | 16.5 | even                | ok     |
|           | 4  | C 28 H 47 N 2 O 7  | 1.38   | 523.3378 | 4.3       | 8.2       | 102.8  | 6.5  | even                | ok     |
|           | 5  | C 25 H 39 N 12 O   | 2.76   | 523.3364 | 2.9       | 5.6       | 118.2  | 12.5 | even                | ok     |
|           | 6  | C 23 H 47 N 4 O 9  | 10.87  | 523.3338 | 0.3       | 0.5       | 126.6  | 2.5  | even                | ok     |
|           | 7  | C 24 H 43 N 8 O 5  | 3.76   | 523.3351 | 1.8       | 3.0       | 132.0  | 7.5  | even                | ok     |
|           | 8  | C 20 H 39 N 14 O 3 | 2.27   | 523.3324 | -1.1      | -2.1      | 145.5  | 8.5  | even                | ok     |
|           | 9  | C 16 H 35 N 20 O   | 0.09   | 523.3297 | -3.8      | -7.2      | 159.3  | 9.5  | even                | ok     |
|           | 10 | C 19 H 43 N 10 O 7 | 0.34   | 523.3311 | -2.4      | -4.6      | 159.4  | 3.5  | even                | ok     |



2-([1,1'-Biphenyl]-4-yl)-N-{4-[N-methyl-N-(tetrahydro-2H-pyran-4yl)aminomethyl]phenyl}-  
6,7-dihydro-5H-benzo[7]annulene-8-carboxamide (**9g**)

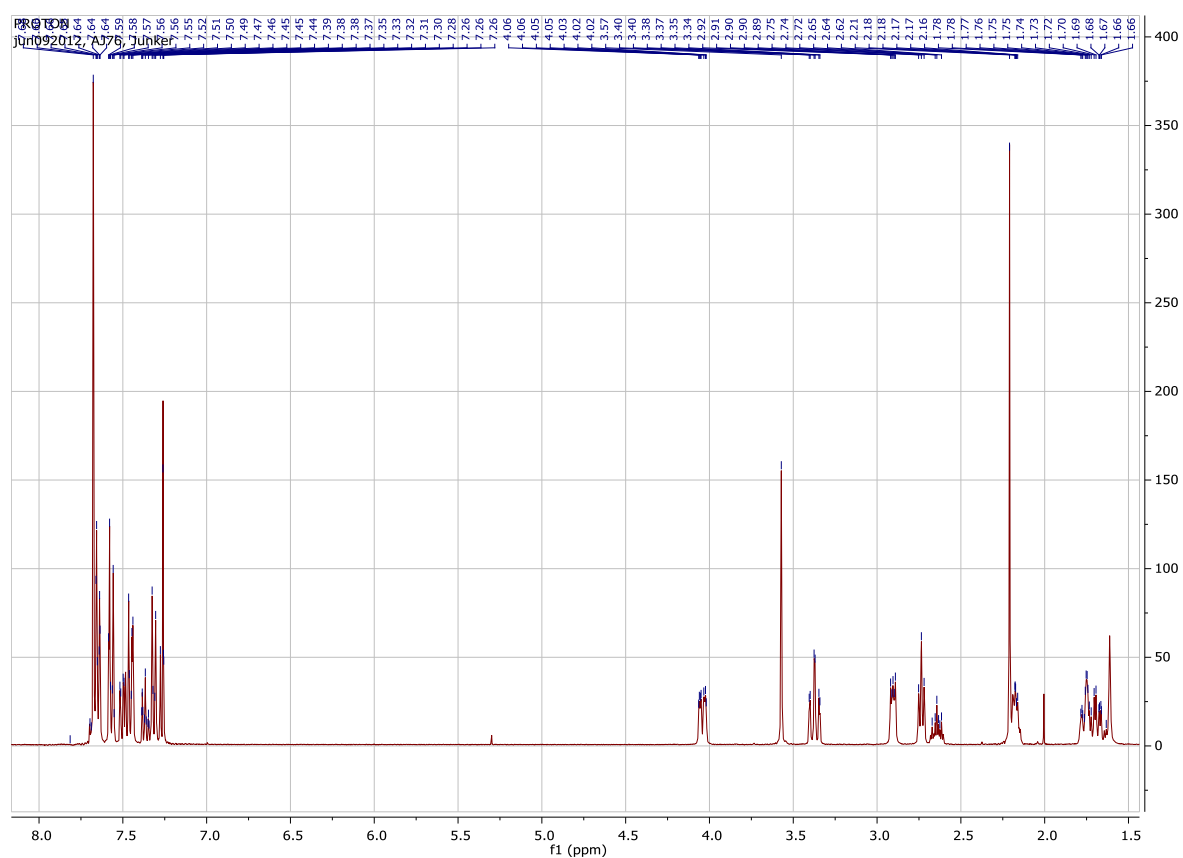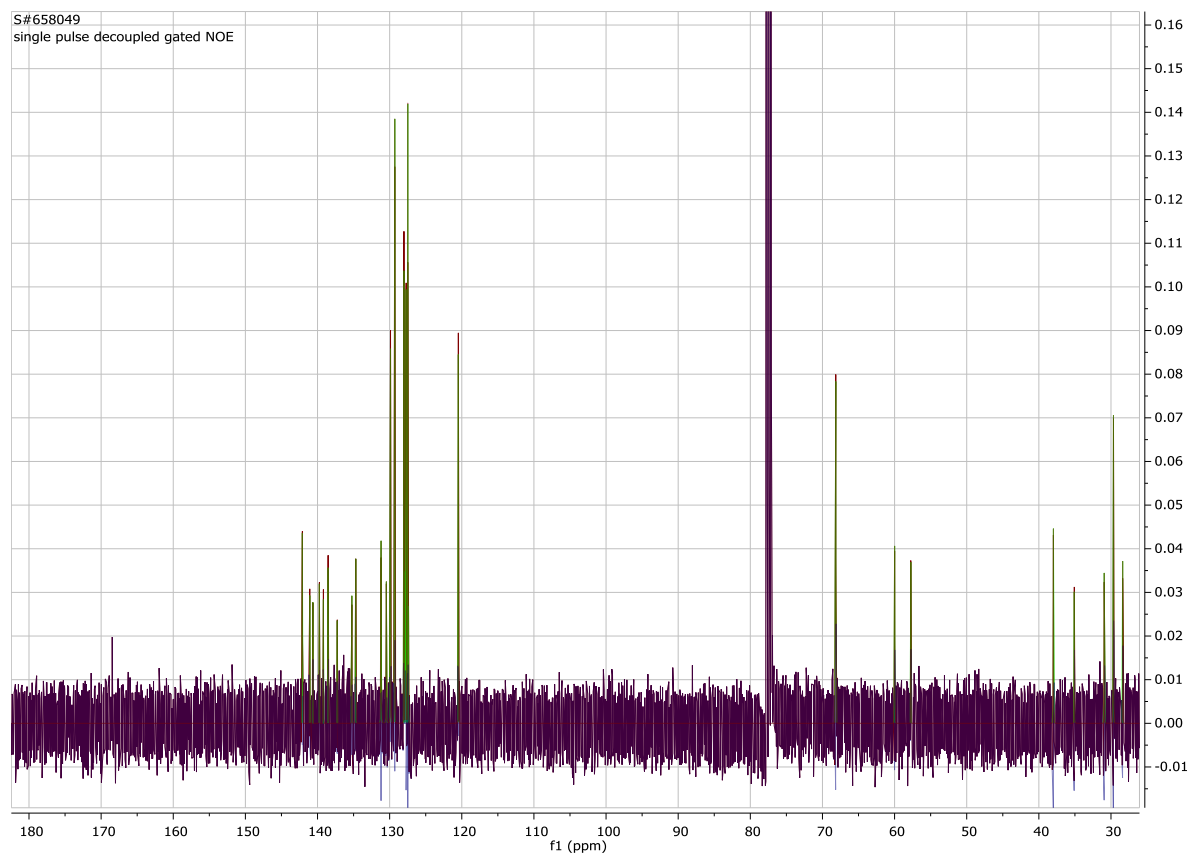

# HPLC

Analyzed: 12.09.12 22:57

Reported: 13.09.12 10:08

Processed: 13.09.12 10:08

Data Path: D:\WIN32APP\HSM\Chromni\DATA\5233\

Application: Chromni

Series: 5233

**Sample Name: AJ7602**

Vial Number: 7

Injection from this vial: 1 of 1

Vial Type: UNK

Volume: 5,0 ul

Chrom Type: HPLC Channel : 1

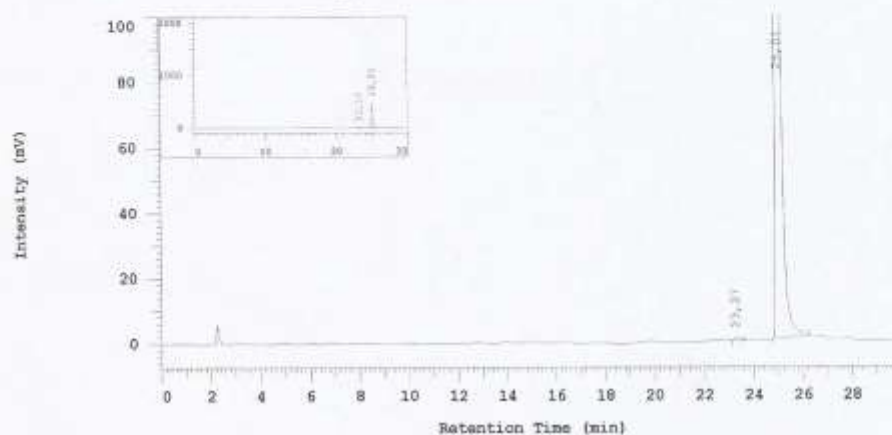

Acquisition Method: Chromni

Blank Subtr Sample Name: ACN

Column Type: 010

Solvent A: Wasser + 0,05%TFA

Developed by: Jens

Solvent B: ACN + 0,05%TFA

| No. | RT    | Area    | Conc 1  | BC |
|-----|-------|---------|---------|----|
| 1   | 23,27 | 14208   | 0,267   | BB |
| 2   | 25,01 | 5311184 | 99,733  | MC |
|     |       | 5325392 | 100,000 |    |

Peak rejection level: 0

## Generic Display Report

## Analysis Info

Analysis Name D:\Data\IPMC\PharmChemie\Routine\LC-MS\2012\_10\_22\AJ76\_BA6\_01\_8456.d  
Method tune\_low\_lcms\_routine\_positiv\_10min.m  
Sample Name AJ76  
Comment Junker  
LCMS-ESI+  
Kalibration mit Li-Formate

Acquisition Date 10/22/2012 3:34:21 PM

Operator Meiners

Instrument microTOF-Q II

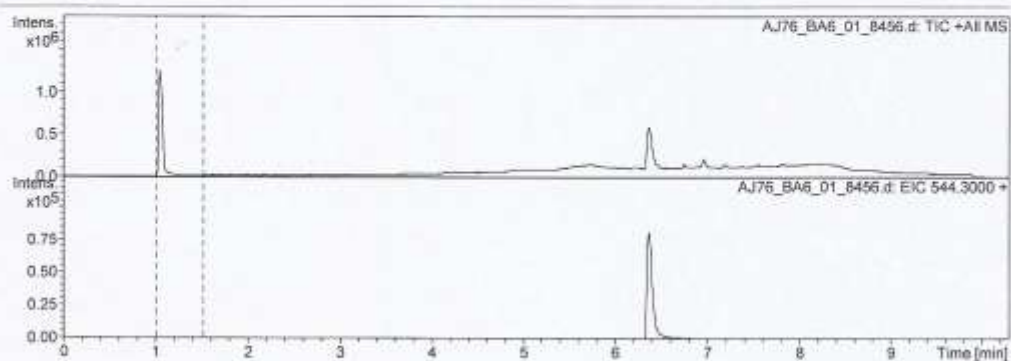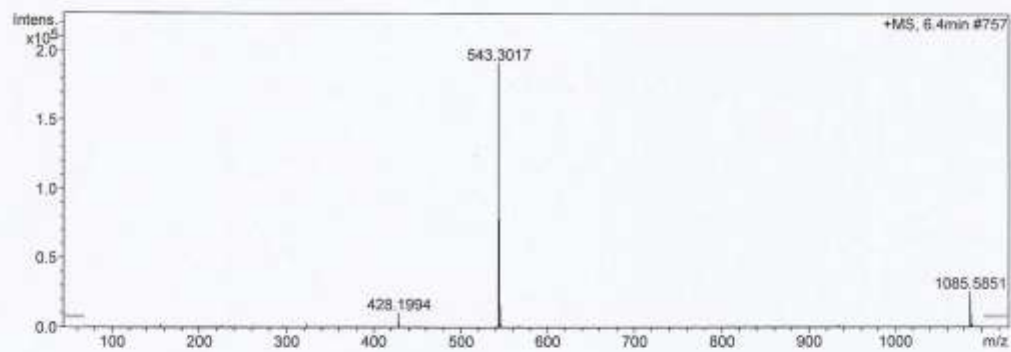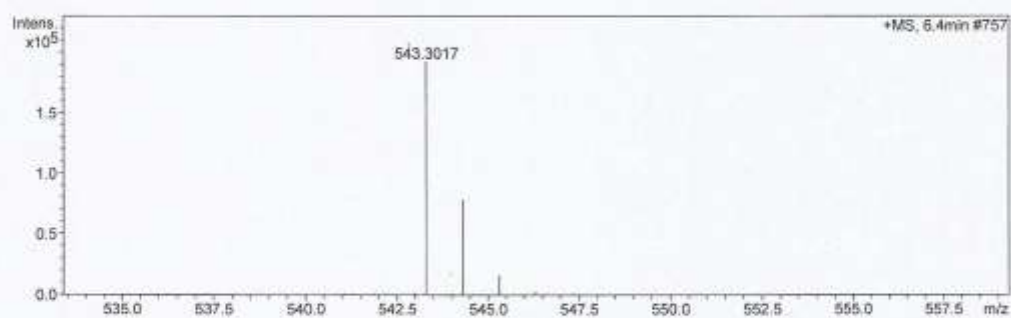

# Mass Spectrum SmartFormula Report

## Analysis Info

Analysis Name D:\Data\IPMC\PharmChemie\Routine\LC-MS\2012\_10\_22\AJ76\_BA6\_01\_8456.d  
 Method tune\_low\_lcms\_routine\_positiv\_10min.m  
 Sample Name AJ76  
 Comment Junker  
 LCMS-ESI+  
 Kalibration mit LI-Formate

Acquisition Date 10/22/2012 3:34:21 PM

Operator Meiners

Instrument / Ser# micrOTOF-Q II 10252

## Acquisition Parameter

Source Type ESI Ion Polarity Positive Set Nebulizer 2.0 Bar  
 Focus Not active Set Capillary 4500 V Set Dry Heater 200 °C  
 Scan Begin 100 m/z Set End Plate Offset -500 V Set Dry Gas 9.0 l/min  
 Scan End 1000 m/z Set Collision Cell RF 300.0 Vpp Set Divert Valve Waste

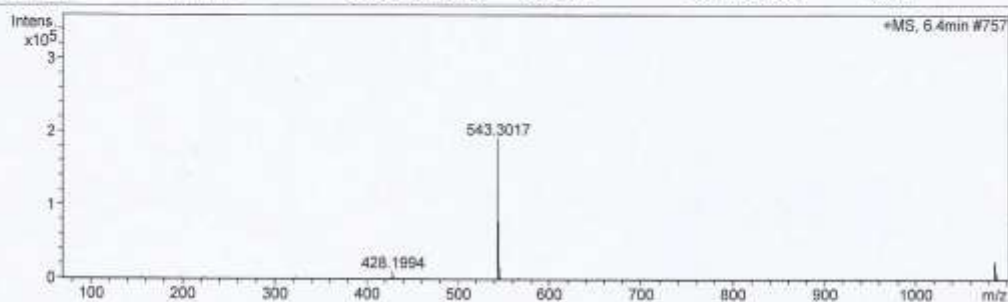

| Meas. m/z | # | Formula           | Score  | m/z      | err [mDa] | err [ppm] | mSigma | rdB  | e <sup>-</sup> Conf | N-Rule |
|-----------|---|-------------------|--------|----------|-----------|-----------|--------|------|---------------------|--------|
| 543.3017  | 1 | C 37 H 39 N 2 O 2 | 100.00 | 543.3006 | -1.1      | -1.9      | 3.9    | 19.5 | even                | ok     |
|           | 2 | C 33 H 35 N 6     | 9.39   | 543.2979 | -3.7      | -6.9      | 9.1    | 20.5 | even                | ok     |
|           | 3 | C 42 H 39         | 14.04  | 543.3046 | 3.0       | 5.5       | 28.1   | 23.5 | even                | ok     |
|           | 4 | C 30 H 43 N 2 O 7 | 1.35   | 543.3085 | 4.8       | 8.9       | 35.6   | 10.5 | even                | ok     |

*N*-{4-[*N*-Methyl-*N*-(tetrahydro-2*H*-pyran-4-yl)aminomethyl]phenyl}-2-(naphthalen-2-yl)-6,7-dihydro-5*H*-benzo[7]annulene-8-carboxamide (**9h**)

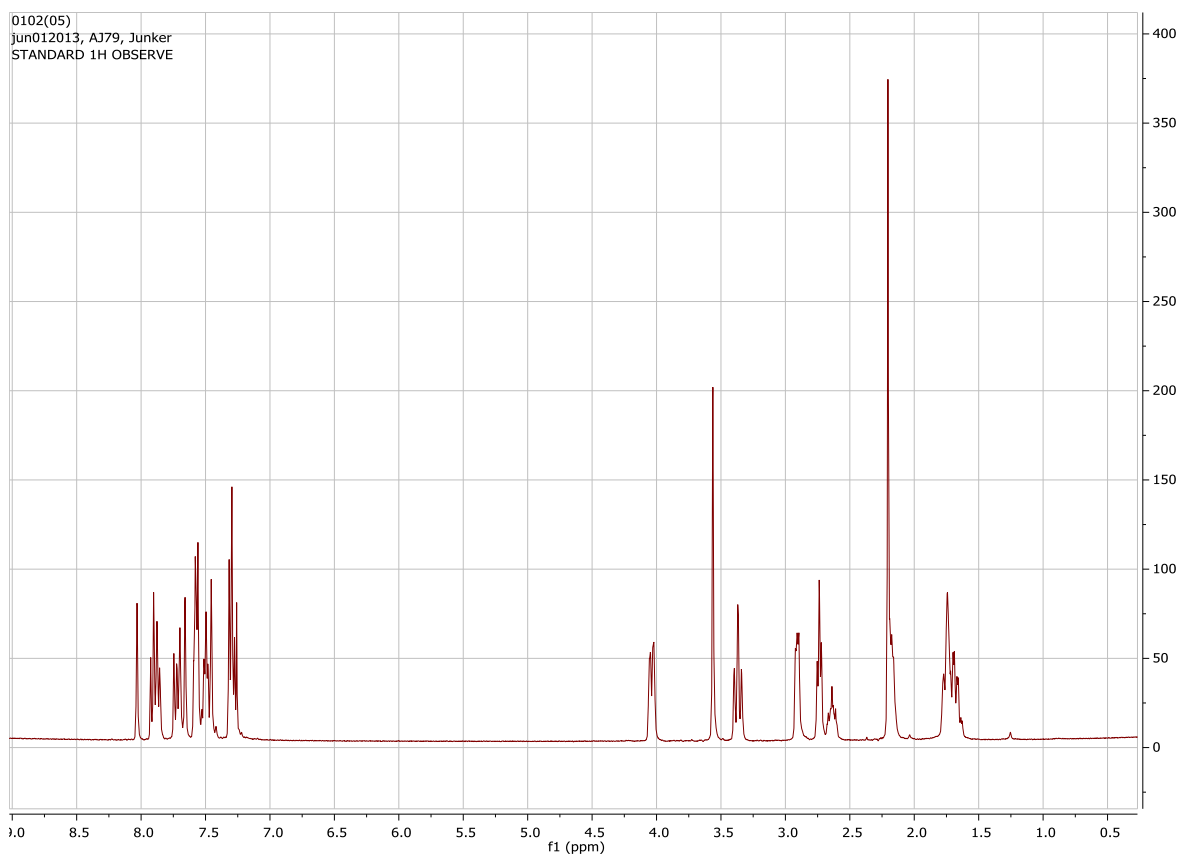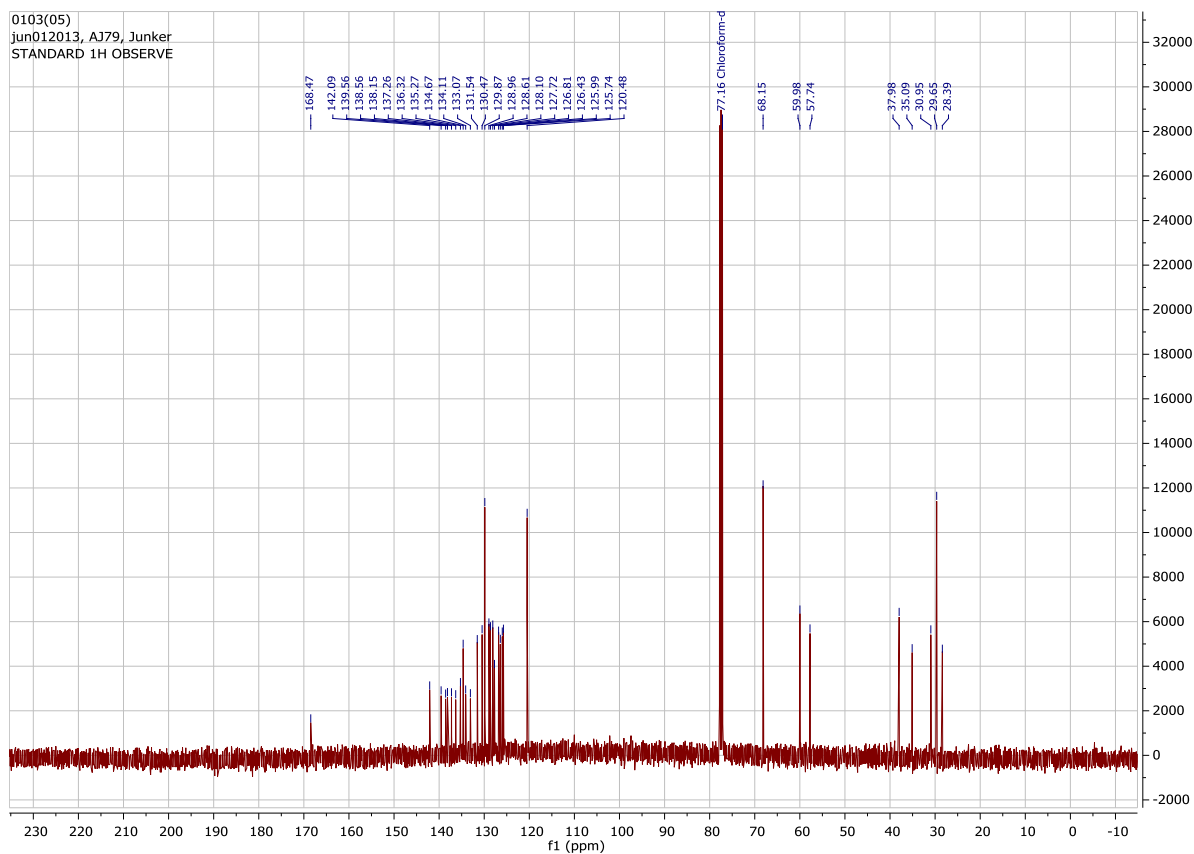

S90

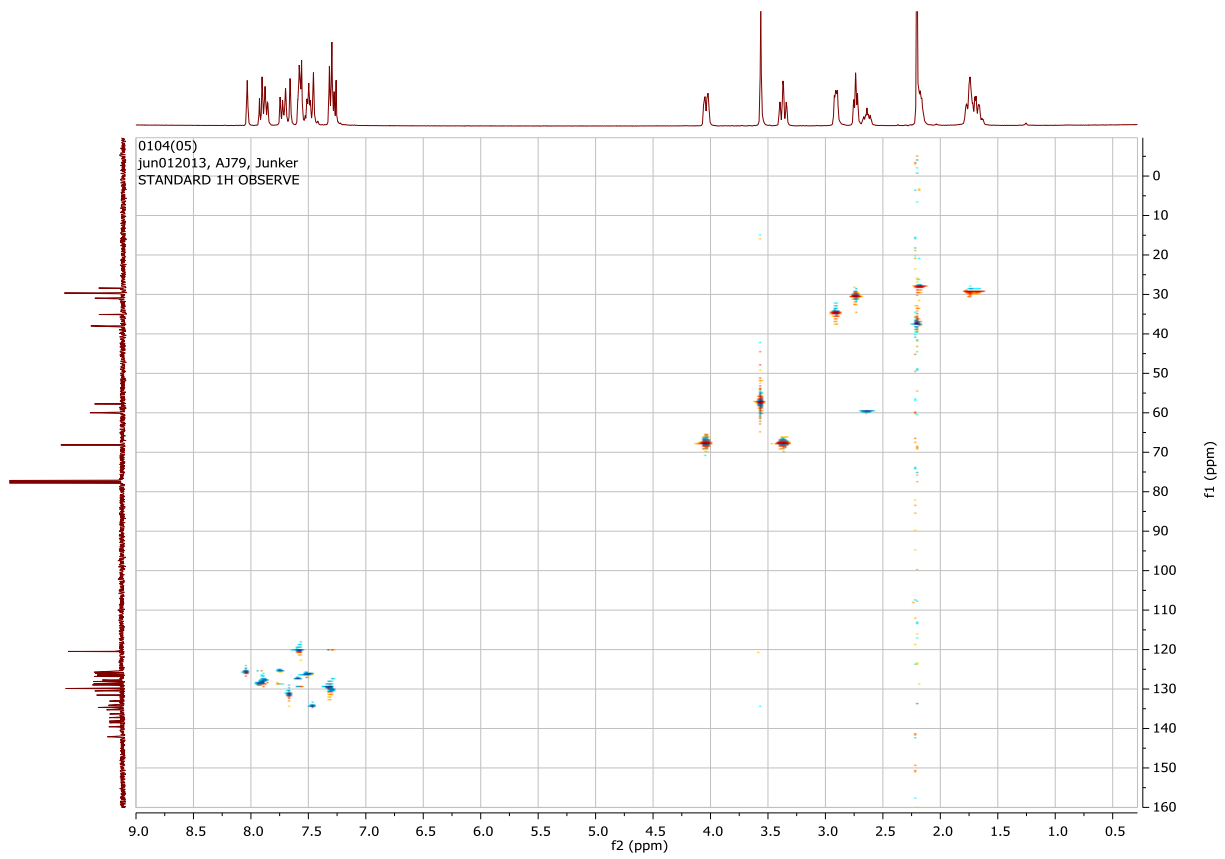

# HPLC

Analyzed: 05.07.12 06:07

Reported: 05.07.12 15:50  
Processed: 05.07.12 15:50

Data Path: D:\WIN32APP\HSM\Chromni\DATA\4975\

Application: Chromni

Series: 4975

**Sample Name: AJ7901**

Vial Number: 16

Injection from this vial: 1 of 1

Vial Type: UNK

Volume: 5,0 ul

Chrom Type: HPLC Channel : 1

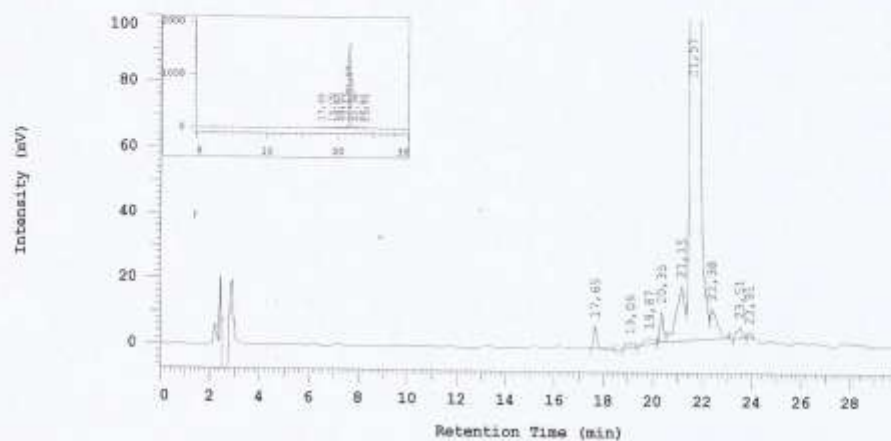

Acquisition Method: Chromni

Blank Subtr Sample Name: ACN

Column Type: 010

Solvent A: Wasser + 0,05%TFA

Developed by: Jens

Solvent B: ACN + 0,05%TFA

| No. | RT    | Area     | Conc 1  | BC |
|-----|-------|----------|---------|----|
| 1   | 17,65 | 69519    | 0,309   | MC |
| 2   | 19,09 | 29553    | 0,132   | BB |
| 3   | 19,87 | 46234    | 0,206   | MC |
| 4   | 20,35 | 85375    | 0,380   | MC |
| 5   | 21,15 | 380256   | 1,692   | MC |
| 6   | 21,57 | 21616632 | 96,199  | MC |
| 7   | 22,38 | 179392   | 0,798   | MC |
| 8   | 23,51 | 51409    | 0,229   | MC |
| 9   | 23,91 | 12416    | 0,055   | MC |
|     |       | 22470786 | 100,000 |    |

Peak rejection level: 0

## Generic Display Report

## Analysis Info

Analysis Name \\p2-mslPZ\PharmChemie\Routine\APCI\12\_08\WJU\_AJ7901.d  
Method APCI\_directprobe\_positiv.m  
Sample Name AJ7901  
Comment Junker  
APCI-Direkt  
Kalibration mit Fettsaeureestern

Acquisition Date 02.08.2012 10:53:37

Operator Meiners  
Instrument micrOTOF-Q II

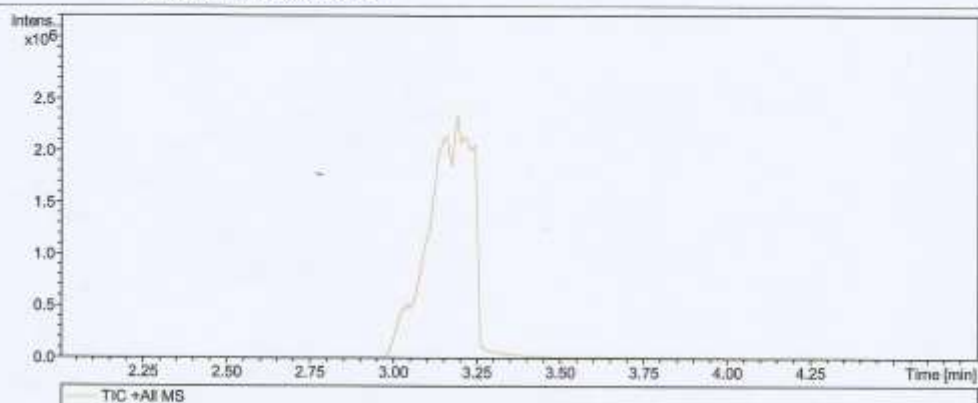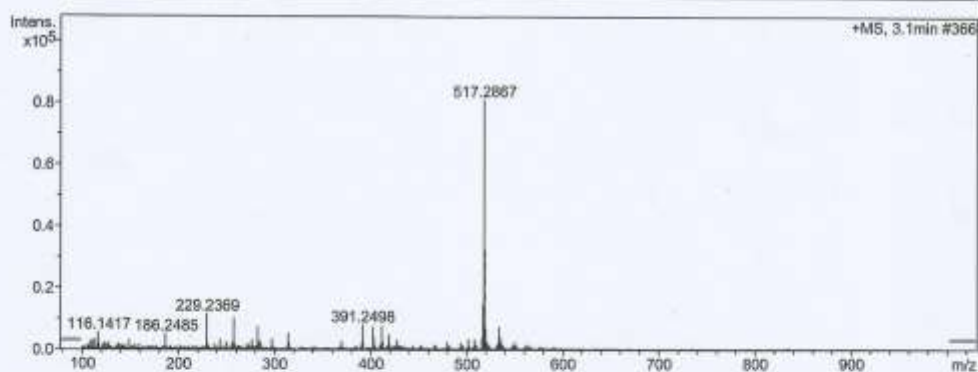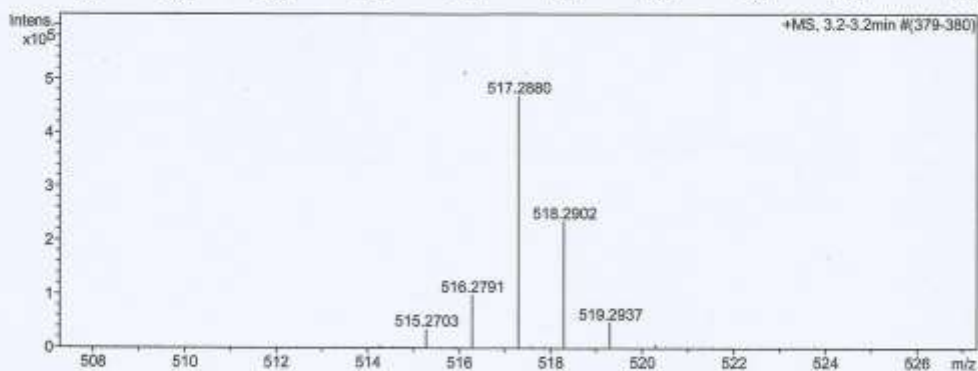



# Mass Spectrum SmartFormula Report

## Analysis Info

Analysis Name: \\p2-ms\PIZ\PharmChemie\Routine\APCI\12\_08\WJU\_AJ7901.d  
 Method: APCI\_directprobe\_positiv.m  
 Sample Name: AJ7901  
 Comment: Junker  
 APCI-Direkt  
 Kalibration mit Fettsaeureestern

Acquisition Date: 02.08.2012 10:53:37

Operator: Meiners  
 Instrument / Ser#: microTOF-Q II 10252

## Acquisition Parameter

|             |            |                       |           |                  |           |
|-------------|------------|-----------------------|-----------|------------------|-----------|
| Source Type | APCI       | Ion Polarity          | Positive  | Set Nebulizer    | 0.7 Bar   |
| Focus       | Not active | Set Capillary         | 4000 V    | Set Dry Heater   | 200 °C    |
| Scan Begin  | 100 m/z    | Set End Plate Offset  | -500 V    | Set Dry Gas      | 3.0 l/min |
| Scan End    | 1000 m/z   | Set Collision Cell RF | 130.0 Vpp | Set Divert Valve | Waste     |

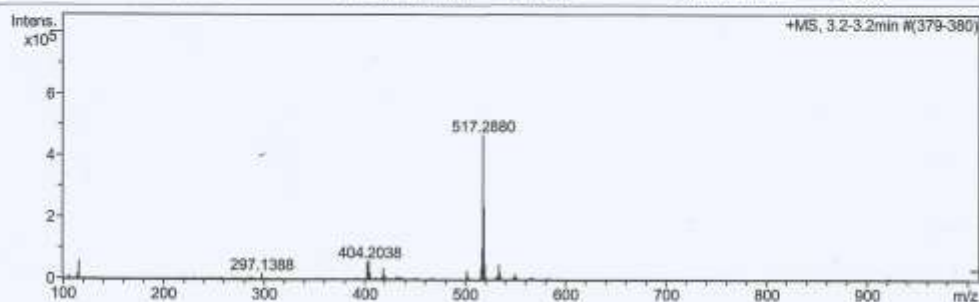

| Meas. m/z | # | Formula                                                        | Score  | m/z      | err [mDa] | err [ppm] | mSigma | rdB  | e <sup>-</sup> Conf | N-Rule |
|-----------|---|----------------------------------------------------------------|--------|----------|-----------|-----------|--------|------|---------------------|--------|
| 297.1388  | 1 | C <sub>21</sub> H <sub>17</sub> N <sub>2</sub>                 | 100.00 | 297.1386 | -0.2      | -0.6      | 6.1    | 14.5 | even                | ok     |
| 518.2902  | 1 | C <sub>16</sub> H <sub>40</sub> N <sub>9</sub> O <sub>10</sub> | 94.69  | 518.2893 | -0.9      | -1.8      | 10.7   | 1.5  | even                | ok     |
| 551.2854  | 1 | C <sub>30</sub> H <sub>39</sub> N <sub>4</sub> O <sub>6</sub>  | 76.07  | 551.2864 | 1.0       | 1.9       | 17.6   | 13.5 | even                | ok     |

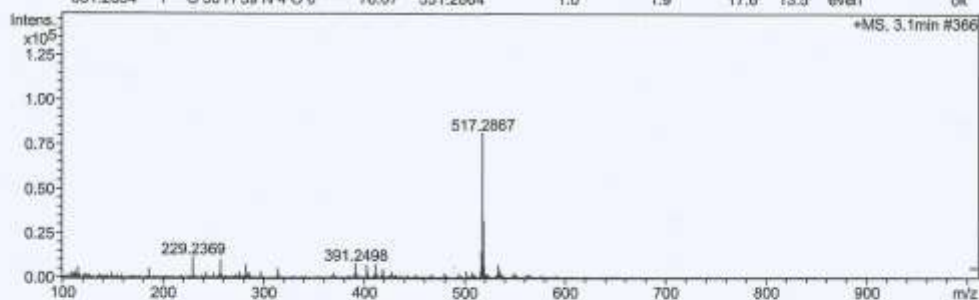

| Meas. m/z | # | Formula                                                       | Score  | m/z      | err [mDa] | err [ppm] | mSigma | rdB  | e <sup>-</sup> Conf | N-Rule |
|-----------|---|---------------------------------------------------------------|--------|----------|-----------|-----------|--------|------|---------------------|--------|
| 315.1602  | 1 | C <sub>8</sub> H <sub>15</sub> N <sub>16</sub> O              | 100.00 | 315.1609 | 0.7       | 2.3       | 11.9   | 6.5  | even                | ok     |
| 391.2498  | 1 | C <sub>24</sub> H <sub>31</sub> N <sub>4</sub> O              | 100.00 | 391.2492 | -0.5      | -1.4      | 4.0    | 11.5 | even                | ok     |
|           | 2 | C <sub>23</sub> H <sub>35</sub> O <sub>5</sub>                | 37.61  | 391.2479 | -1.9      | -4.8      | 12.9   | 6.5  | even                | ok     |
| 411.3995  | 1 | C <sub>30</sub> H <sub>51</sub>                               | 100.00 | 411.3985 | -1.0      | -2.4      | 16.0   | 5.5  | even                | ok     |
| 517.2867  | 1 | C <sub>35</sub> H <sub>37</sub> N <sub>2</sub> O <sub>2</sub> | 100.00 | 517.2850 | -1.7      | -3.4      | 3.5    | 18.5 | even                | ok     |

2-(2-Fluoropyridin-3-yl)-N-{4-[N-methyl-N-(tetrahydro-2H-pyran-4-yl)aminomethyl]phenyl}-6,7-dihydro-5H-benzo[7]annulene-8-carboxamide (**9j**)

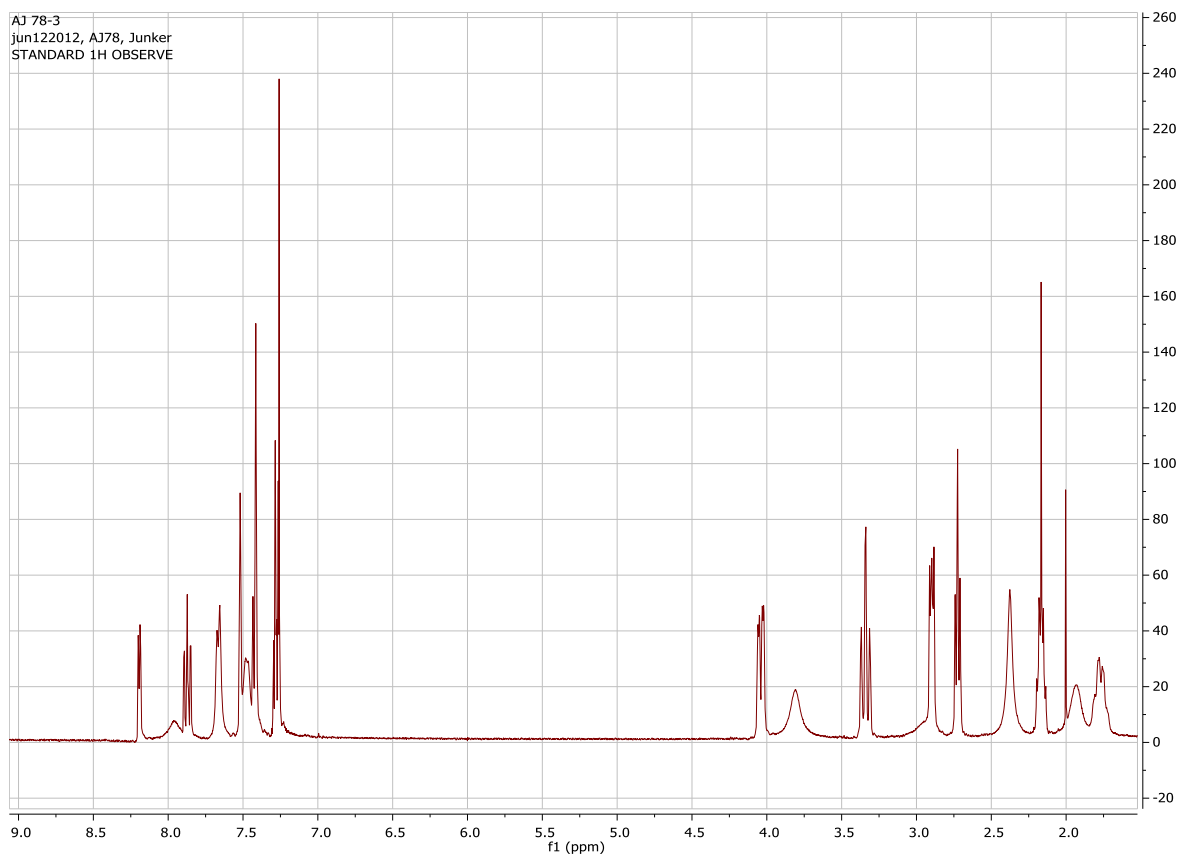

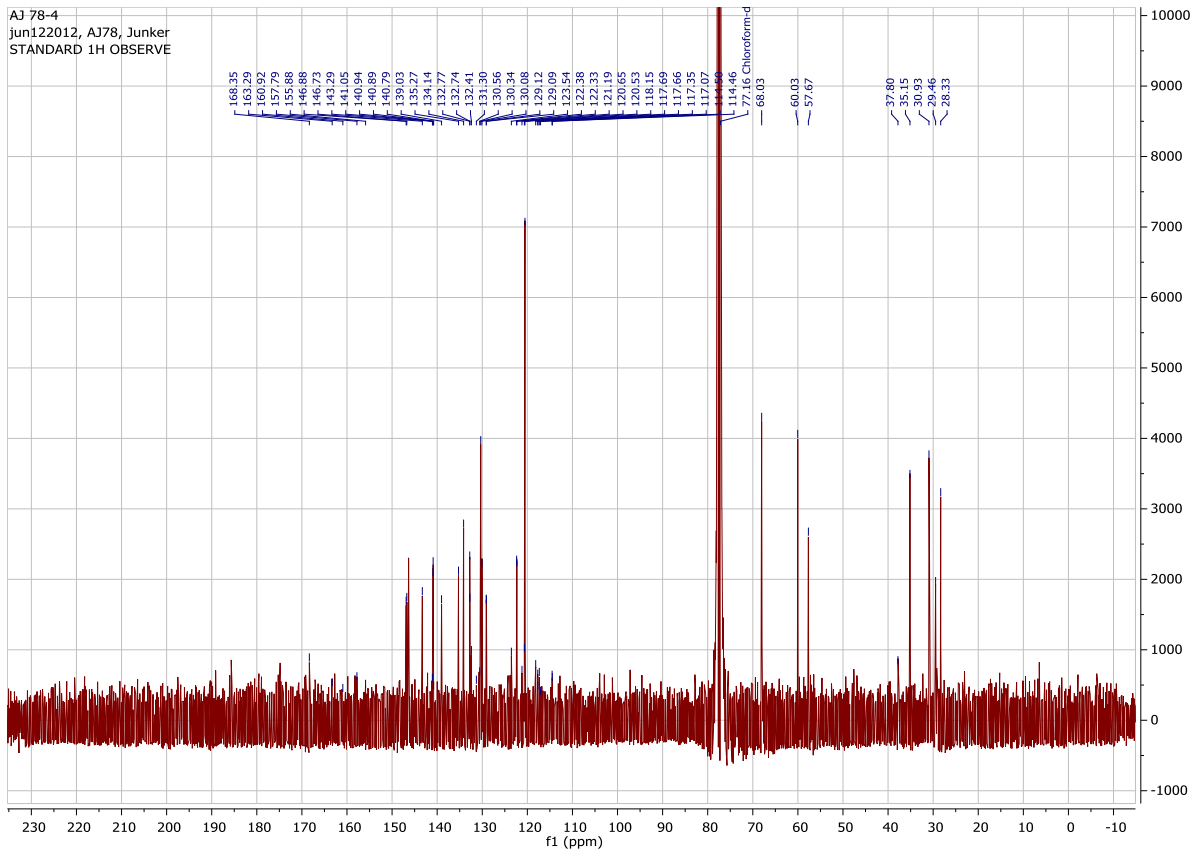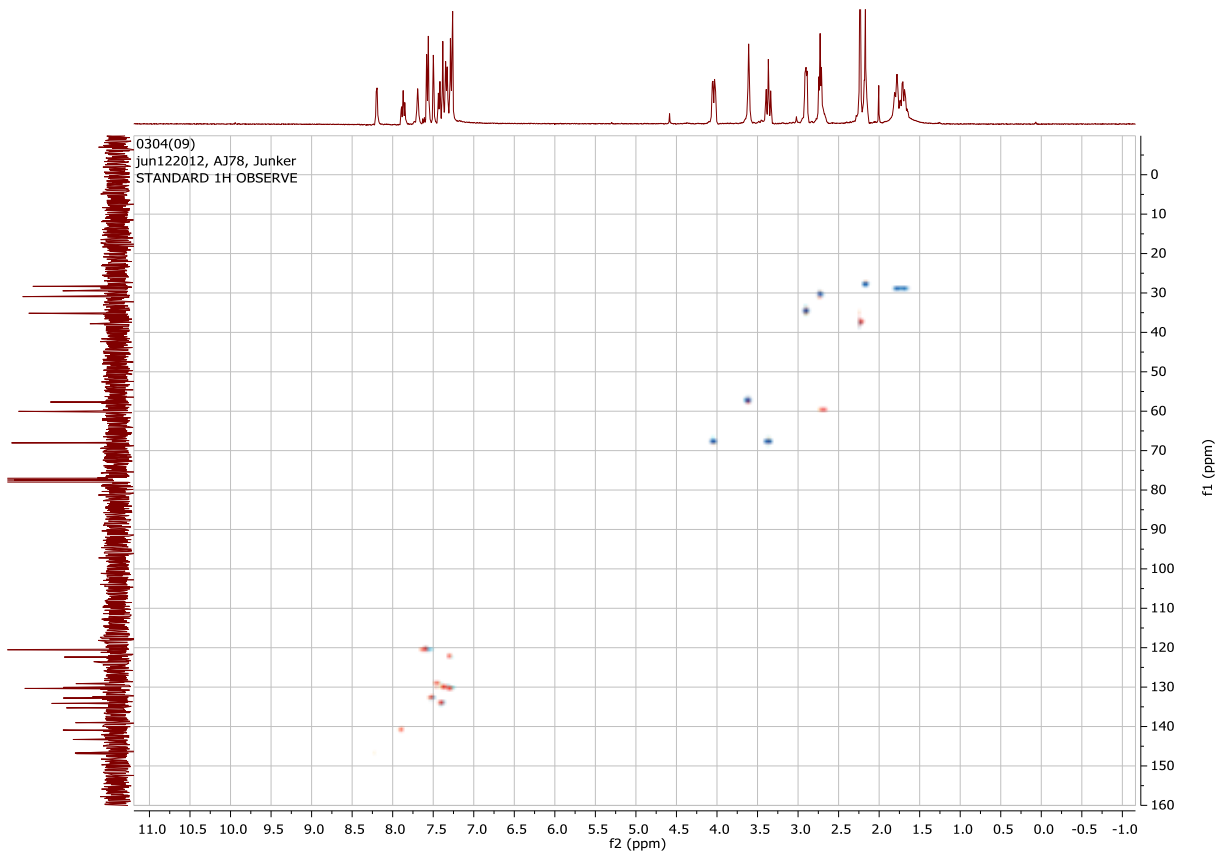

# HPLC

Analyzed: 29.11.12 09:45

Reported: 30.11.12 09:18  
Processed: 30.11.12 09:18

Data Path: D:\WIN32APP\HSM\Chromni\DATA\5605\  
Application: Chromni

Series: 5605  
Vial Number: 23  
Vial Type: UNK  
Volume: 5,0 ul

**Sample Name: AJ78**

Injection from this vial: 1 of 1

Chrom Type: HPLC Channel : 1

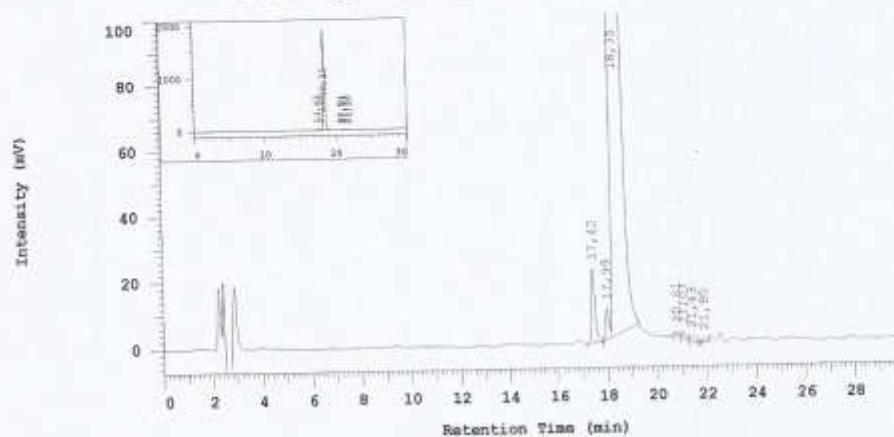

Acquisition Method: Chromni

Blank Subtr Sample Name: ACN

Column Type: 010

Solvent A: Wasser + 0,05%TFA

Developed by: Jens

Solvent B: ACN + 0,05%TFA

| No. | RT    | Area     | Conc 1  | BC |
|-----|-------|----------|---------|----|
| 1   | 17,42 | 212460   | 0,687   | BB |
| 2   | 17,99 | 82817    | 0,268   | BV |
| 3   | 18,35 | 30571654 | 98,846  | VB |
| 4   | 20,81 | 10723    | 0,035   | BB |
| 5   | 21,07 | 14352    | 0,046   | BB |
| 6   | 21,43 | 24293    | 0,079   | BB |
| 7   | 21,90 | 12166    | 0,039   | BB |
|     |       | 30928465 | 100,000 |    |

Peak rejection level: 0

## Generic Display Report

## Analysis Info

Analysis Name E:\Meiners\12\_12\WJU\_AJ78.d  
Method APCI\_directprobe\_positiv.m  
Sample Name AJ78  
Comment Junker  
APCI-Direkt  
Kalibration mit Fettsaeureestern

Acquisition Date 12/10/2012 8:55:51 AM

Operator Meiners  
Instrument micrOTOF-Q II

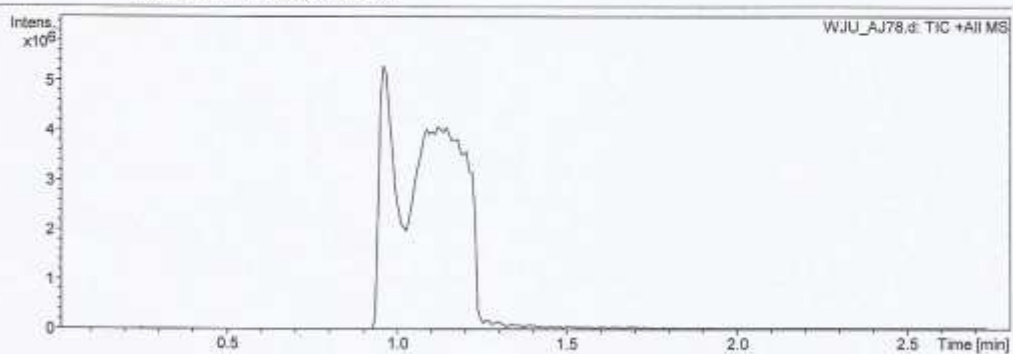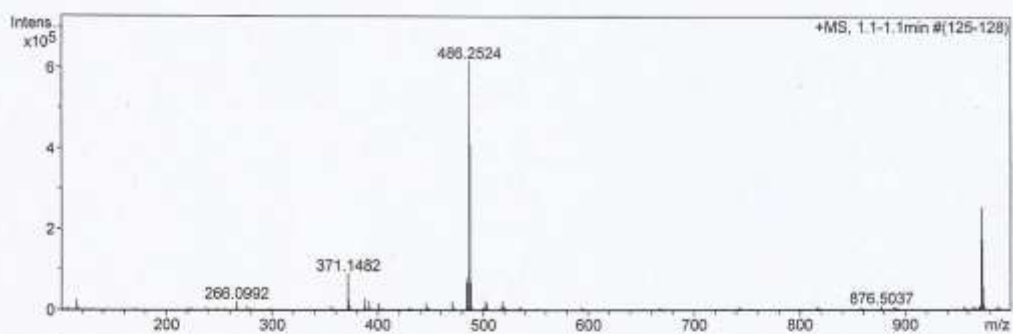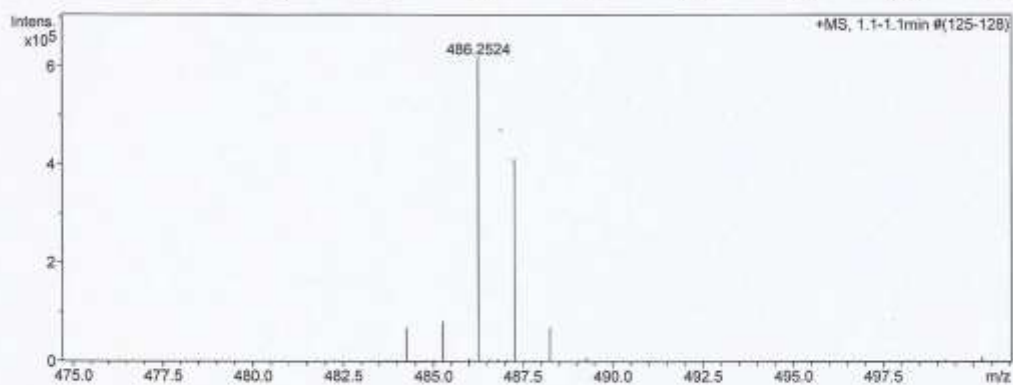

# Mass Spectrum SmartFormula Report

## Analysis Info

Analysis Name E:\Meiners\12\_12\WJU\_AJ78.d  
 Method APCI\_directprobe\_positiv.m  
 Sample Name AJ78  
 Comment Junker  
 APCI-Direkt  
 Kalibration mit Fettsaeureestern

Acquisition Date 12/10/2012 8:55:51 AM

Operator Meiners  
 Instrument / Ser# micrOTOF-Q II 10252

## Acquisition Parameter

|             |            |                       |           |                  |           |
|-------------|------------|-----------------------|-----------|------------------|-----------|
| Source Type | APCI       | Ion Polarity          | Positive  | Set Nebulizer    | 0.7 Bar   |
| Focus       | Not active | Set Capillary         | 4000 V    | Set Dry Heater   | 200 °C    |
| Scan Begin  | 100 m/z    | Set End Plate Offset  | -500 V    | Set Dry Gas      | 3.0 l/min |
| Scan End    | 1000 m/z   | Set Collision Cell RF | 130.0 Vpp | Set Divert Valve | Waste     |

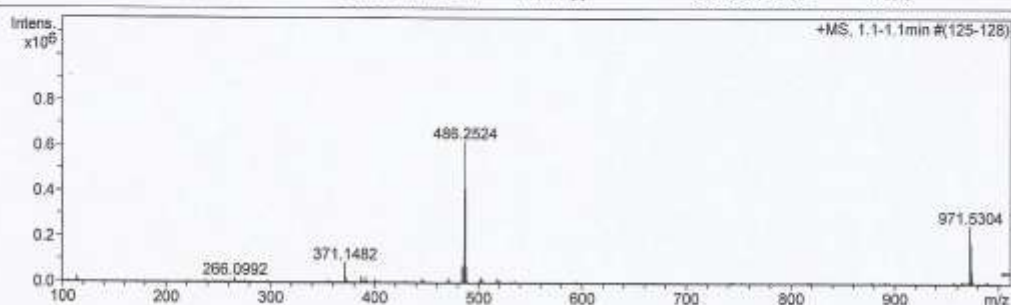

| Meas. m/z | #  | Formula                                                                      | Score  | m/z      | err [mDa] | err [ppm] | mSigma | rdb  | e <sup>-</sup> Conf | N-Rule |
|-----------|----|------------------------------------------------------------------------------|--------|----------|-----------|-----------|--------|------|---------------------|--------|
| 486.2524  | 1  | C <sub>30</sub> H <sub>33</sub> F <sub>3</sub> N <sub>3</sub> O <sub>2</sub> | 46.16  | 486.2551 | 2.7       | 5.5       | 163.7  | 15.5 | even                | ok     |
|           | 2  | C <sub>28</sub> H <sub>32</sub> F <sub>4</sub> N <sub>3</sub>                | 100.00 | 486.2527 | 0.3       | 0.5       | 175.4  | 12.5 | even                | ok     |
|           | 3  | C <sub>27</sub> H <sub>34</sub> F <sub>2</sub> N <sub>3</sub> O <sub>3</sub> | 4.18   | 486.2563 | 3.8       | 7.9       | 180.3  | 11.5 | even                | ok     |
|           | 4  | C <sub>24</sub> H <sub>37</sub> F <sub>3</sub> N <sub>3</sub> O <sub>8</sub> | 2.87   | 486.2498 | -2.7      | -5.5      | 199.9  | 6.5  | even                | ok     |
|           | 5  | C <sub>26</sub> H <sub>29</sub> F <sub>3</sub> N <sub>3</sub>                | 10.64  | 486.2524 | 0.0       | 0.0       | 204.4  | 16.5 | even                | ok     |
|           | 6  | C <sub>26</sub> H <sub>31</sub> F <sub>3</sub> N <sub>3</sub> O <sub>5</sub> | 0.08   | 486.2475 | -4.9      | -10.1     | 211.1  | 12.5 | even                | ok     |
|           | 7  | C <sub>21</sub> H <sub>38</sub> F <sub>2</sub> N <sub>3</sub> O <sub>9</sub> | 1.66   | 486.2509 | -1.5      | -3.1      | 216.4  | 2.5  | even                | ok     |
|           | 8  | C <sub>25</sub> H <sub>33</sub> F <sub>3</sub> N <sub>3</sub> O <sub>4</sub> | 1.84   | 486.2511 | -1.3      | -2.7      | 216.6  | 11.5 | even                | ok     |
|           | 9  | C <sub>25</sub> H <sub>33</sub> F <sub>3</sub> N <sub>3</sub> O <sub>3</sub> | 1.09   | 486.2538 | 1.4       | 2.9       | 221.8  | 8.5  | even                | ok     |
|           | 10 | C <sub>23</sub> H <sub>30</sub> F <sub>2</sub> N <sub>3</sub> O <sub>5</sub> | 1.05   | 486.2536 | 1.2       | 2.4       | 223.6  | 12.5 | even                | ok     |
|           | 11 | C <sub>18</sub> H <sub>37</sub> F <sub>3</sub> N <sub>3</sub> O <sub>9</sub> | 0.04   | 486.2570 | 4.5       | 9.4       | 225.5  | 2.5  | even                | ok     |
|           | 12 | C <sub>24</sub> H <sub>35</sub> F <sub>3</sub> N <sub>3</sub> O <sub>4</sub> | 0.02   | 486.2574 | 5.0       | 10.2      | 227.3  | 7.5  | even                | ok     |
|           | 13 | C <sub>23</sub> H <sub>32</sub> F <sub>4</sub> N <sub>3</sub> O <sub>2</sub> | 0.05   | 486.2487 | -3.8      | -7.8      | 230.0  | 8.5  | even                | ok     |
|           | 14 | C <sub>21</sub> H <sub>29</sub> F <sub>3</sub> N <sub>3</sub> O <sub>2</sub> | 0.04   | 486.2484 | -4.0      | -8.2      | 231.9  | 12.5 | even                | ok     |
|           | 15 | C <sub>22</sub> H <sub>34</sub> F <sub>2</sub> N <sub>3</sub> O <sub>5</sub> | 0.56   | 486.2523 | -0.2      | -0.4      | 235.7  | 7.5  | even                | ok     |
|           | 16 | C <sub>20</sub> H <sub>31</sub> F <sub>3</sub> N <sub>3</sub> O <sub>2</sub> | 0.09   | 486.2547 | 2.3       | 4.7       | 240.6  | 8.5  | even                | ok     |
|           | 17 | C <sub>22</sub> H <sub>34</sub> F <sub>3</sub> N <sub>3</sub> O <sub>2</sub> | 0.07   | 486.2550 | 2.5       | 5.2       | 240.7  | 4.5  | even                | ok     |
|           | 18 | C <sub>20</sub> H <sub>33</sub> F <sub>3</sub> N <sub>3</sub> O <sub>3</sub> | 0.03   | 486.2498 | -2.6      | -5.4      | 249.0  | 4.5  | even                | ok     |
|           | 19 | C <sub>18</sub> H <sub>30</sub> F <sub>2</sub> N <sub>3</sub> O <sub>3</sub> | 0.02   | 486.2495 | -2.9      | -5.9      | 251.0  | 8.5  | even                | ok     |
|           | 20 | C <sub>20</sub> H <sub>33</sub> F <sub>3</sub> N <sub>3</sub>                | 0.09   | 486.2525 | 0.1       | 0.2       | 254.0  | 1.5  | even                | ok     |
|           | 21 | C <sub>19</sub> H <sub>35</sub> F <sub>3</sub> N <sub>3</sub> O <sub>6</sub> | 0.05   | 486.2534 | 1.0       | 2.0       | 254.6  | 3.5  | even                | ok     |
|           | 22 | C <sub>18</sub> H <sub>27</sub> F <sub>3</sub> N <sub>3</sub>                | 0.07   | 486.2520 | -0.4      | -0.8      | 255.7  | 9.5  | even                | ok     |
|           | 23 | C <sub>18</sub> H <sub>30</sub> F <sub>3</sub> N <sub>3</sub>                | 0.07   | 486.2523 | -0.1      | -0.3      | 256.0  | 5.5  | even                | ok     |
|           | 24 | C <sub>17</sub> H <sub>32</sub> F <sub>4</sub> N <sub>3</sub> O <sub>3</sub> | 0.00   | 486.2559 | 3.4       | 7.1       | 259.5  | 4.5  | even                | ok     |
|           | 25 | C <sub>19</sub> H <sub>35</sub> F <sub>3</sub> N <sub>3</sub> O <sub>3</sub> | 0.00   | 486.2561 | 3.7       | 7.6       | 259.6  | 0.5  | even                | ok     |
|           | 26 | C <sub>15</sub> H <sub>29</sub> F <sub>3</sub> N <sub>3</sub> O <sub>3</sub> | 0.00   | 486.2556 | 3.2       | 6.6       | 261.5  | 8.5  | even                | ok     |
|           | 27 | C <sub>17</sub> H <sub>34</sub> F <sub>2</sub> N <sub>3</sub> O <sub>7</sub> | 0.00   | 486.2482 | -4.2      | -8.6      | 262.9  | 3.5  | even                | ok     |
|           | 28 | C <sub>19</sub> H <sub>37</sub> F <sub>3</sub> N <sub>3</sub> O <sub>7</sub> | 0.00   | 486.2485 | -4.0      | -8.2      | 263.0  | -0.5 | even                | ok     |
|           | 29 | C <sub>15</sub> H <sub>31</sub> F <sub>3</sub> N <sub>3</sub> O <sub>4</sub> | 0.01   | 486.2507 | -1.7      | -3.5      | 267.8  | 4.5  | even                | ok     |
|           | 30 | C <sub>17</sub> H <sub>34</sub> F <sub>3</sub> N <sub>3</sub> O <sub>4</sub> | 0.01   | 486.2510 | -1.5      | -3.1      | 267.8  | 0.5  | even                | ok     |
|           | 31 | C <sub>15</sub> H <sub>31</sub> F <sub>3</sub> N <sub>3</sub> O <sub>4</sub> | 0.01   | 486.2534 | 1.0       | 2.0       | 273.0  | 1.5  | even                | ok     |
|           | 32 | C <sub>14</sub> H <sub>33</sub> F <sub>3</sub> N <sub>3</sub> O <sub>7</sub> | 0.00   | 486.2543 | 1.9       | 3.8       | 273.4  | 3.5  | even                | ok     |

2-(6-Isopropoxy-pyridin-3-yl)-N-{4-[N-methyl-N-(tetrahydro-2H-pyran-4-yl)aminomethyl]phenyl}-6,7-dihydro-5H-benzo[7]annulene-8-carboxamide (**9k**)

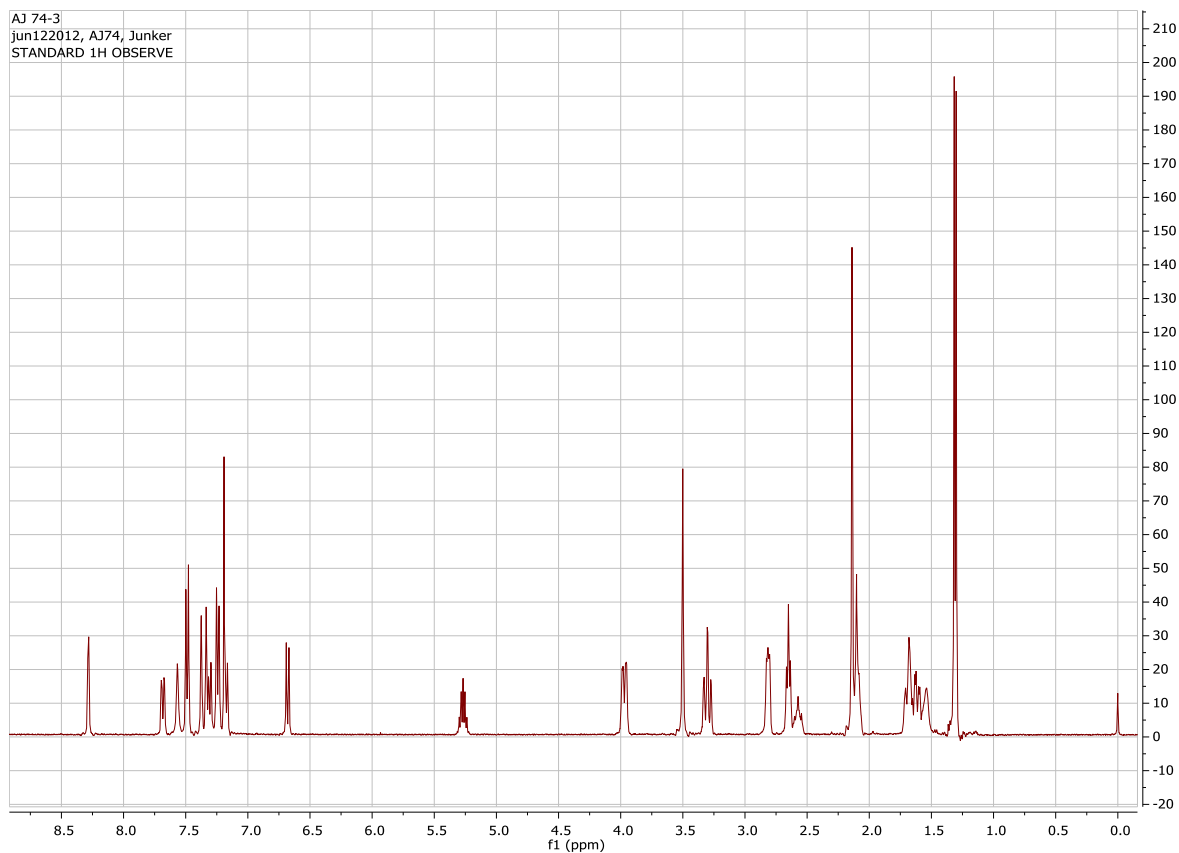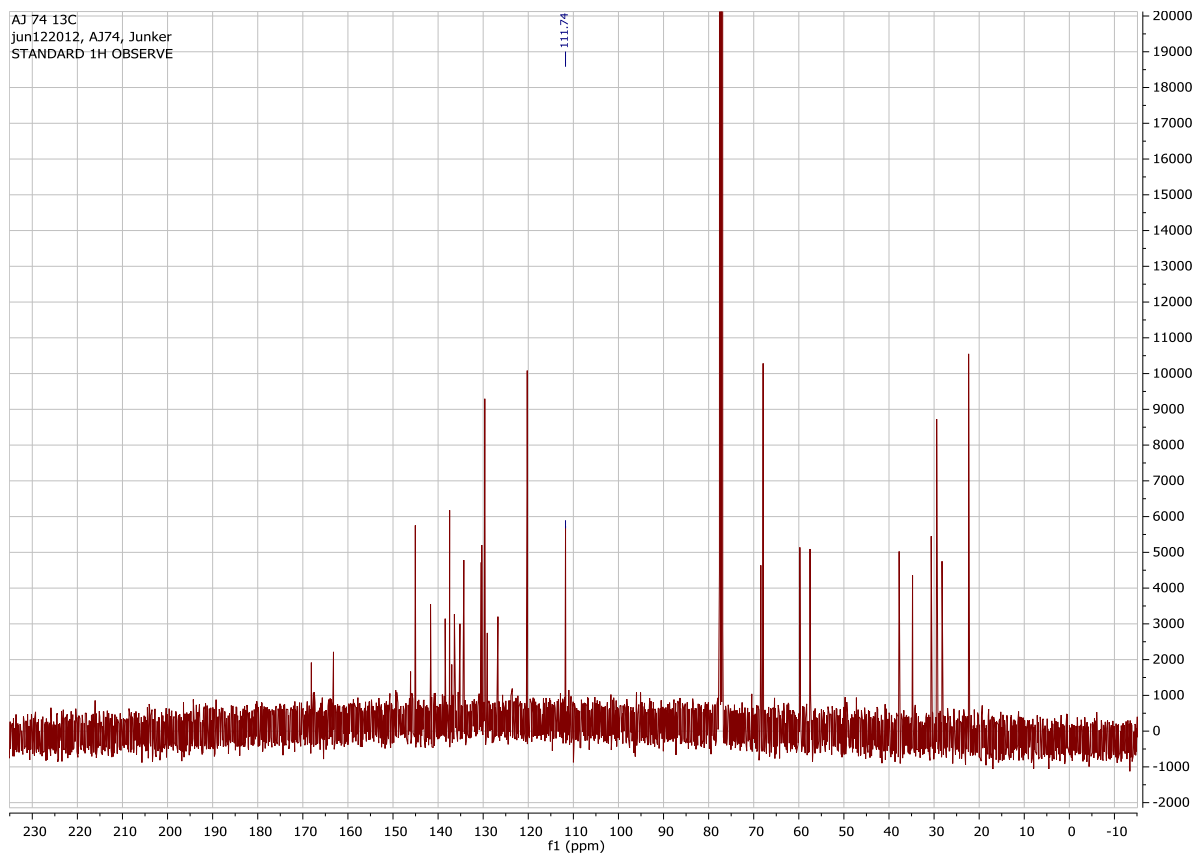

S100

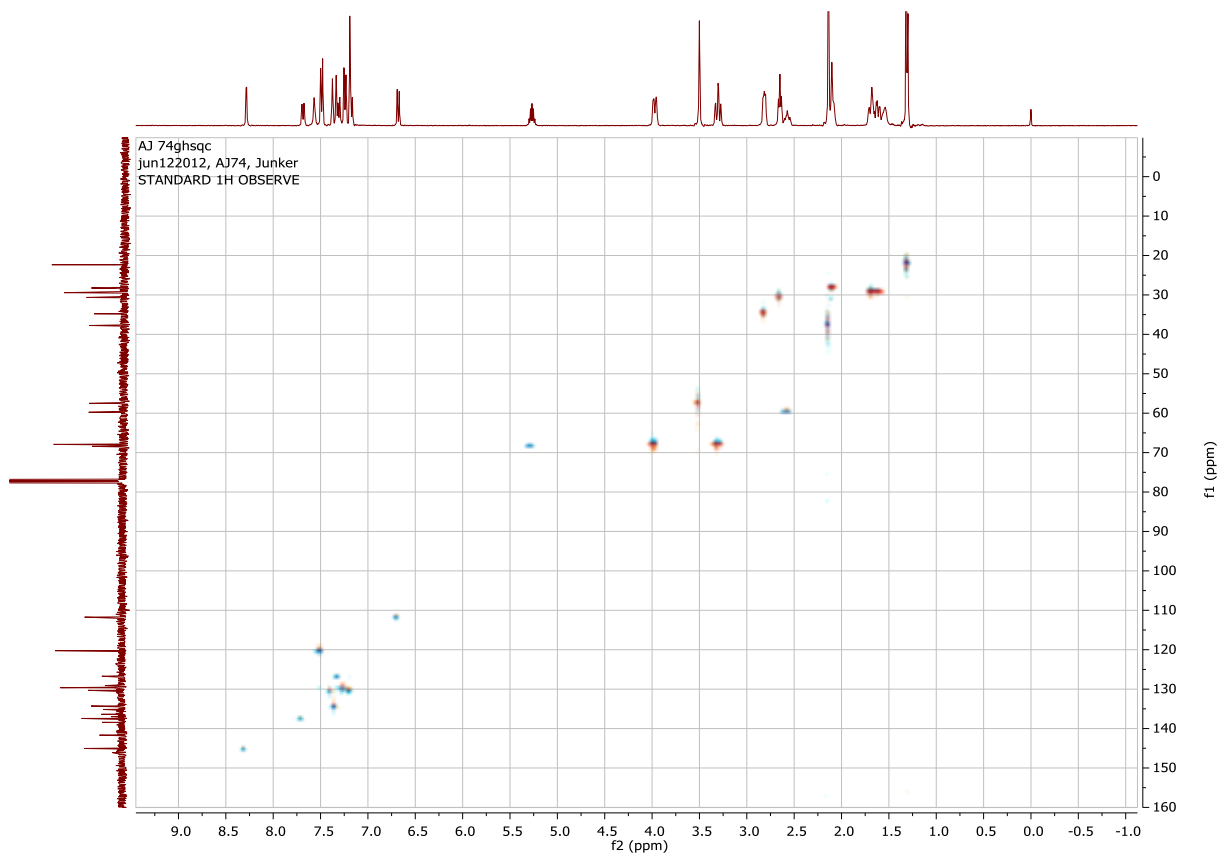



# HPLC

Analyzed: 05.12.12 22:31

Reported: 06.12.12 09:19  
Processed: 06.12.12 09:19

Data Path: D:\WIN32APP\HSM\Chromni\DATA\5629\

Application: Chromni

**Sample Name: AJ74**

Injection from this vial: 1 of 1

Series: 5629

Vial Number: 7

Vial Type: UNK

Volume: 5,0 ul

Chrom Type: HPLC Channel : 1

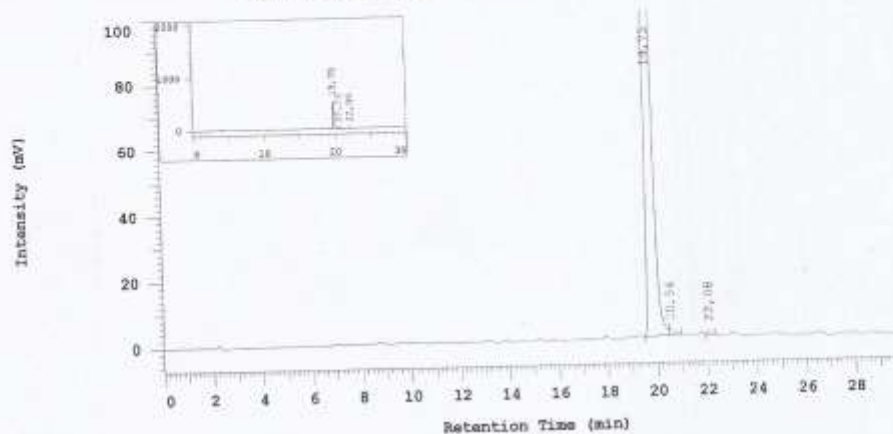

Acquisition Method: Chromni

Blank Subtr Sample Name: ACN

Column Type: 010

Solvent A: Wasser + 0,05%TFA

Developed by: Jens

Solvent B: ACN + 0,05%TFA

| No. | RT    | Area    | Conc 1  | BC |
|-----|-------|---------|---------|----|
| 1   | 19,75 | 6214690 | 99,369  | MC |
| 2   | 20,54 | 24206   | 0,387   | MC |
| 3   | 22,08 | 15226   | 0,243   | MC |
|     |       | 6254122 | 100,000 |    |

Peak rejection level: 0

## Generic Display Report

## Analysis Info

Analysis Name D:\Data\PMC\PharmChemie\Routine\APCI\12\_12\WJU\_AJ74.d  
Method APCI\_directprobe\_positiv.m  
Sample Name A\_174  
Comment JUnker  
APCI-Direkt  
Kalibration mit Fettsaeureestern

Acquisition Date 12/18/2012 9:28:57 AM

Operator Meiners  
Instrument microTOF-Q II

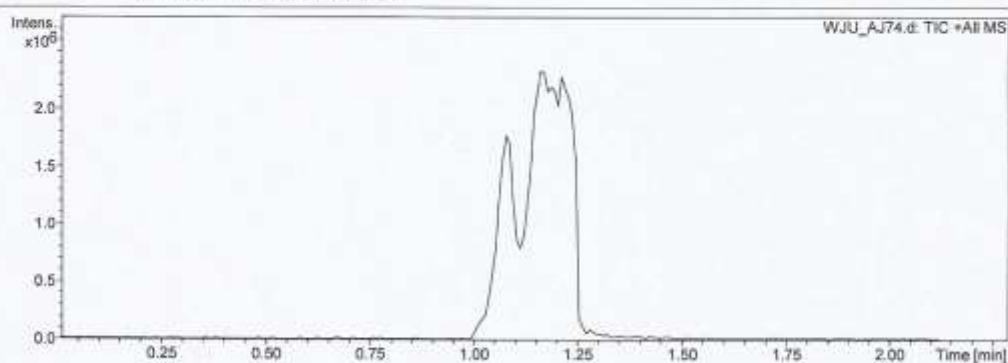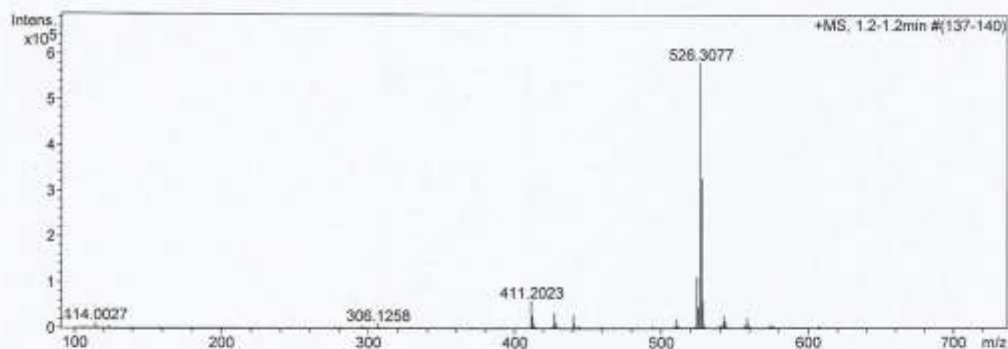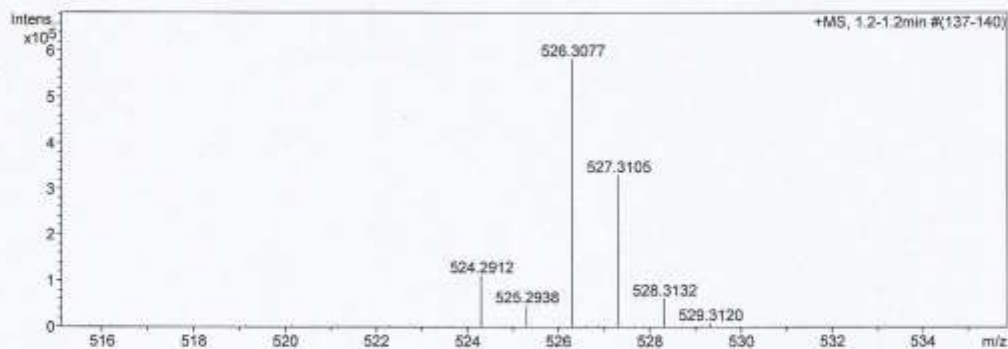

# Mass Spectrum SmartFormula Report

## Analysis Info

Analysis Name D:\Data\PMCI\PharmChemie\Routine\APCI\12\_12\WJU\_AJ74.d  
 Method APCI\_directprobe\_positiv.m  
 Sample Name AJ74  
 Comment JUnker  
 APCI-Direkt  
 Kalibration mit Fettsaeureestern

Acquisition Date 12/18/2012 9:28:57 AM

Operator Meiners

Instrument / Ser# micrOTOF-Q II 10252

## Acquisition Parameter

|             |            |                       |           |                  |           |
|-------------|------------|-----------------------|-----------|------------------|-----------|
| Source Type | APCI       | Ion Polarity          | Positive  | Set Nebulizer    | 0.7 Bar   |
| Focus       | Not active | Set Capillary         | 4000 V    | Set Dry Heater   | 200 °C    |
| Scan Begin  | 100 m/z    | Set End Plate Offset  | -500 V    | Set Dry Gas      | 3.0 l/min |
| Scan End    | 1000 m/z   | Set Collision Cell RF | 130.0 Vpp | Set Divert Valve | Waste     |

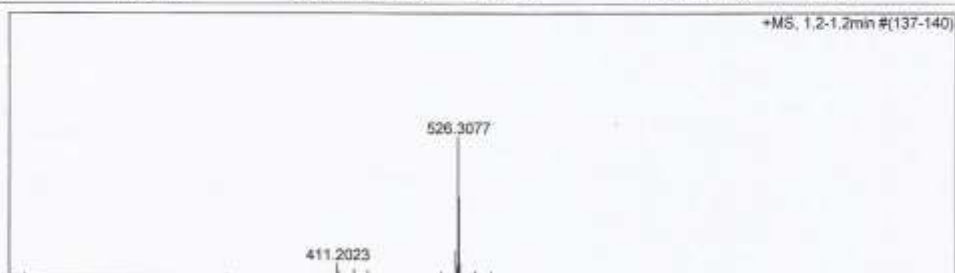

| Meas. m/z | #  | Formula                                                        | Score  | m/z      | err [mDa] | err [ppm] | mSigma | rdb  | e <sup>-</sup> Conf | N-Rule |
|-----------|----|----------------------------------------------------------------|--------|----------|-----------|-----------|--------|------|---------------------|--------|
| 526.3077  | 1  | C <sub>38</sub> H <sub>40</sub> N <sub>2</sub> O               | 85.35  | 526.3104 | 2.8       | 5.3       | 73.8   | 19.5 | even                | ok     |
|           | 2  | C <sub>33</sub> H <sub>40</sub> N <sub>3</sub> O <sub>3</sub>  | 100.00 | 526.3064 | -1.2      | -2.4      | 97.8   | 15.5 | even                | ok     |
|           | 3  | C <sub>29</sub> H <sub>36</sub> N <sub>2</sub> O               | 5.18   | 526.3037 | -3.9      | -7.5      | 109.7  | 16.5 | even                | ok     |
|           | 4  | C <sub>26</sub> H <sub>44</sub> N <sub>3</sub> O <sub>8</sub>  | 0.49   | 526.3123 | 4.6       | 8.8       | 136.1  | 6.5  | even                | ok     |
|           | 5  | C <sub>23</sub> H <sub>36</sub> N <sub>3</sub> O <sub>2</sub>  | 0.66   | 526.3109 | 3.3       | 6.2       | 156.4  | 12.5 | even                | ok     |
|           | 6  | C <sub>21</sub> H <sub>44</sub> N <sub>5</sub> O <sub>10</sub> | 4.49   | 526.3083 | 0.6       | 1.2       | 157.9  | 2.5  | even                | ok     |
|           | 7  | C <sub>19</sub> H <sub>32</sub> N <sub>2</sub> O               | 1.91   | 526.3083 | 0.6       | 1.1       | 170.0  | 13.5 | even                | ok     |
|           | 8  | C <sub>22</sub> H <sub>40</sub> N <sub>2</sub> O <sub>6</sub>  | 0.80   | 526.3096 | 1.9       | 3.7       | 170.5  | 7.5  | even                | ok     |
|           | 9  | C <sub>18</sub> H <sub>36</sub> N <sub>3</sub> O <sub>4</sub>  | 0.62   | 526.3069 | -0.7      | -1.4      | 183.9  | 8.5  | even                | ok     |
|           | 10 | C <sub>14</sub> H <sub>32</sub> N <sub>2</sub> O <sub>2</sub>  | 0.03   | 526.3042 | -3.4      | -6.5      | 197.3  | 9.5  | even                | ok     |
|           | 11 | C <sub>17</sub> H <sub>40</sub> N <sub>3</sub> O <sub>8</sub>  | 0.08   | 526.3056 | -2.1      | -3.9      | 197.8  | 3.5  | even                | ok     |
|           | 12 | C <sub>13</sub> H <sub>36</sub> N <sub>3</sub> O <sub>6</sub>  | 0.00   | 526.3029 | -4.8      | -9.1      | 211.1  | 4.5  | even                | ok     |

2-(4-Fluorophenyl)-N-[[N-methyl-N-(tetrahydro-2H-pyran-4-yl)aminomethyl]phenyl]-6,7-dihydro-5H-benzo[7]annulene-8-carboxamide (**9l**)

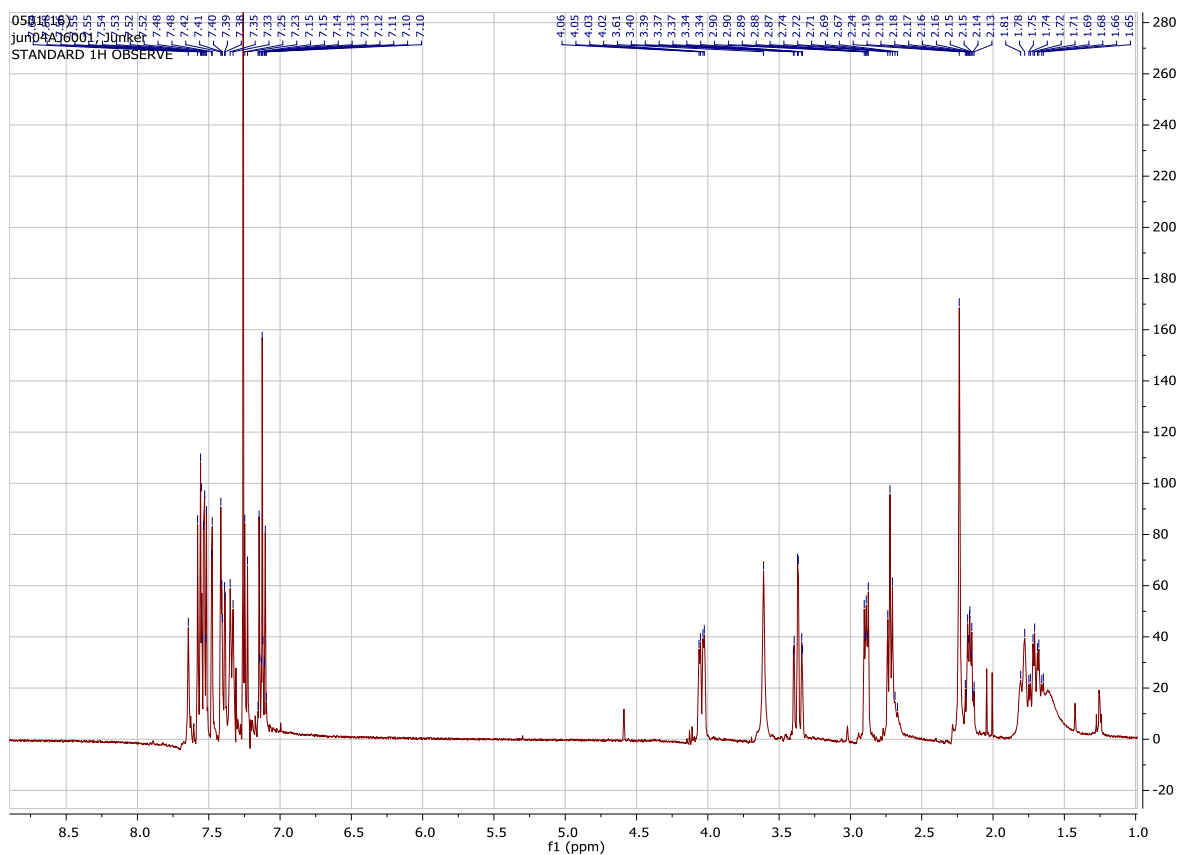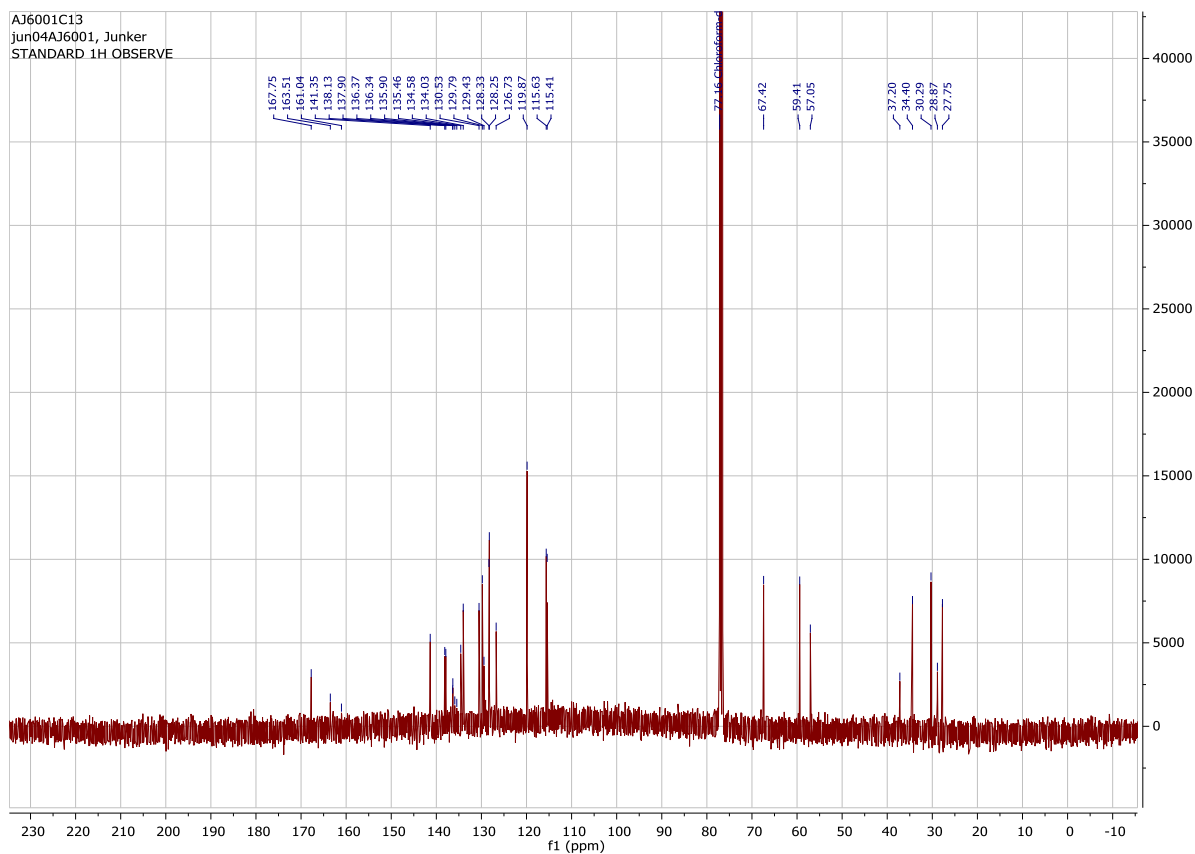

# HPLC

Analyzed: 07.04.11 00:01

Reported: 08.04.11 08:04

Processed: 08.04.11 08:04

Data Path: D:\WIN32APP\HSM\Chromni\DATA\2932\

Application: Chromni

Series: 2932

**Sample Name: AJ6001**

Vial Number: 8

Injection from this vial: 1 of 1

Vial Type: UNK

Volume: 5,0 ul

Chrom Type: HPLC Channel : 1

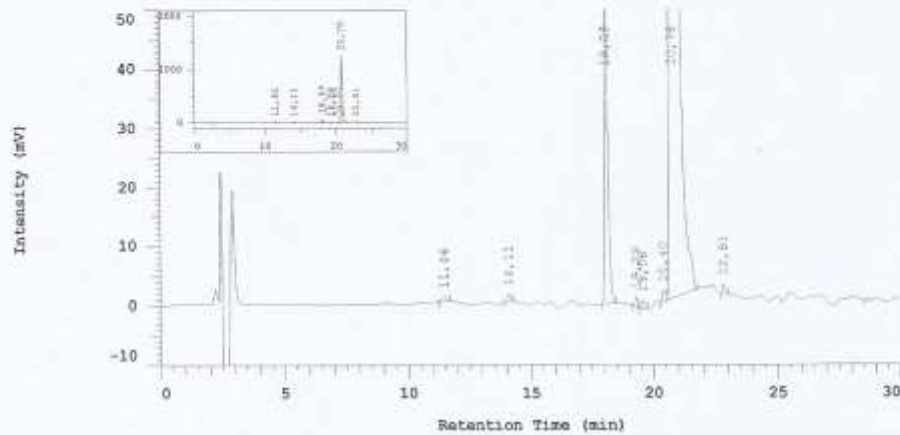

Acquisition Method: Chromni

Blank Subtr Sample Name: ACN

Column Type: 010

Developed by: Jens

Solvent A: Wasser + 0,05%TFA

Solvent B: ACN + 0,05%TFA

| No. | RT    | Area     | Conc 1  | BC |
|-----|-------|----------|---------|----|
| 1   | 11,46 | 9825     | 0,056   | MC |
| 2   | 14,11 | 13863    | 0,080   | MC |
| 3   | 18,09 | 476322   | 2,736   | MC |
| 4   | 19,29 | 10713    | 0,062   | BB |
| 5   | 19,56 | 12243    | 0,070   | MC |
| 6   | 20,40 | 16915    | 0,097   | MC |
| 7   | 20,78 | 16857190 | 96,819  | BB |
| 8   | 22,81 | 14032    | 0,081   | MC |
|     |       | 17411103 | 100,000 |    |

Peak rejection level: 0

## Generic Display Report

## Analysis Info

Analysis Name D:\Data\IPMC\PharmChemie\Routine\2011\_4\WJU\_AJ6001.d  
Method Kurz\_pos\_MS\_low.m  
Sample Name AJ6001  
Comment Junker  
ESI-Direkt  
Kalibration mit LI-Formate

Acquisition Date 4/18/2011 7:46:36 AM

Operator Meiners

Instrument microTOF-Q II

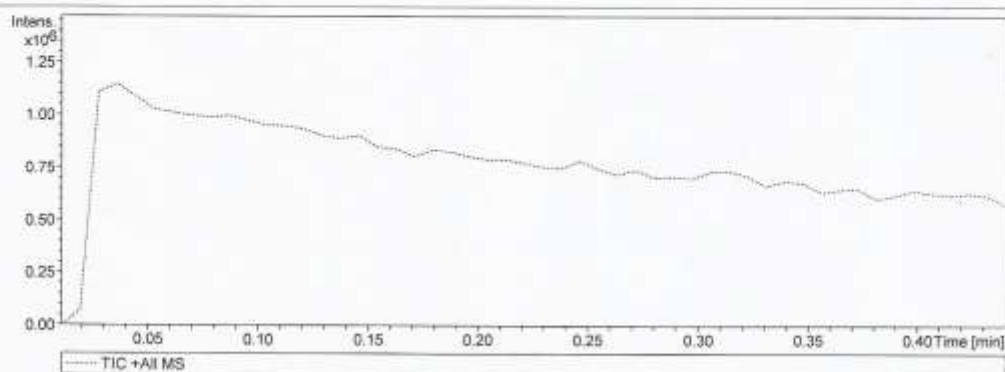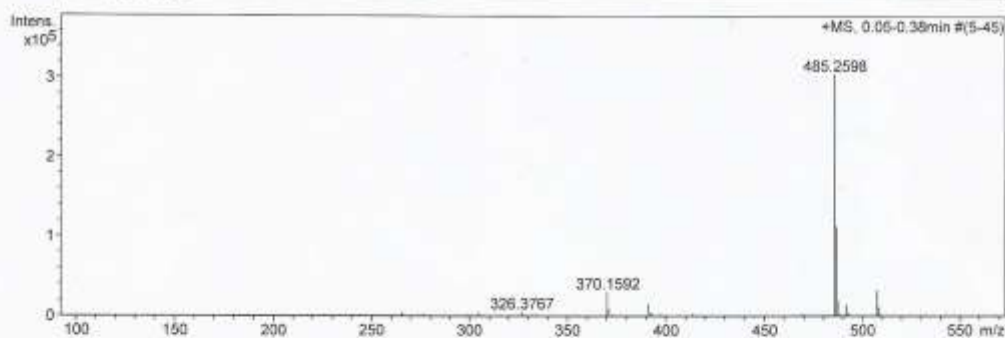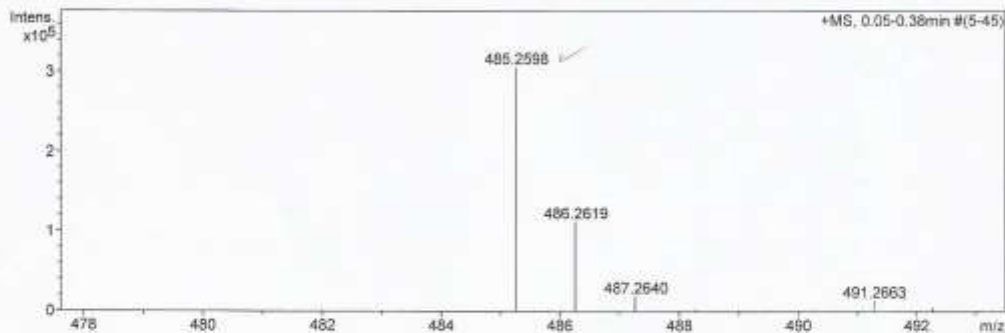

## Mass Spectrum SmartFormula Report

## Analysis Info

Analysis Name D:\Data\IPMC\PharmChemie\Routine\2011\_4\WJU\_AJ6001.d  
Method Kurz\_pos\_MS\_low.m  
Sample Name AJ6001  
Comment Junker  
ESI-Direkt  
Kalibration mit LI-Formate

Acquisition Date 4/18/2011 7:46:36 AM

Operator Meiners

Instrument / Ser# micrOTOF-Q II 10252

## Acquisition Parameter

|             |            |                       |           |                  |           |
|-------------|------------|-----------------------|-----------|------------------|-----------|
| Source Type | ESI        | Ion Polarity          | Positive  | Set Nebulizer    | 5.0 Bar   |
| Focus       | Not active | Set Capillary         | 4500 V    | Set Dry Heater   | 220 °C    |
| Scan Begin  | 50 m/z     | Set End Plate Offset  | -500 V    | Set Dry Gas      | 9.0 l/min |
| Scan End    | 1000 m/z   | Set Collision Cell RF | 500.0 Vpp | Set Divert Valve | Waste     |

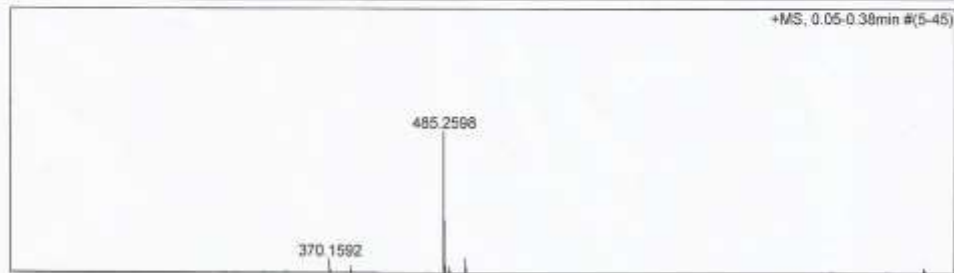

| Meas. m/z | # | Formula                                                        | m/z      | err [mDa] | err [ppm] | mSigma | rdb  | e <sup>-</sup> | Conf | N-Rule | I        |
|-----------|---|----------------------------------------------------------------|----------|-----------|-----------|--------|------|----------------|------|--------|----------|
| 485.2598  | 1 | C <sub>31</sub> H <sub>34</sub> FN <sub>2</sub> O <sub>2</sub> | 485.2599 | 0.1       | 0.2       | 9.9    | 15.5 | even           |      | ok     | 304884 ✓ |

2-(4-Fluoro-3-methylphenyl)-N-{4-[N-methyl-N-(tetrahydro-2H-pyran-4-yl)aminomethyl]phenyl}-6,7-dihydro-5H-benzo[7]annulene-8-carboxamide (**9m**)

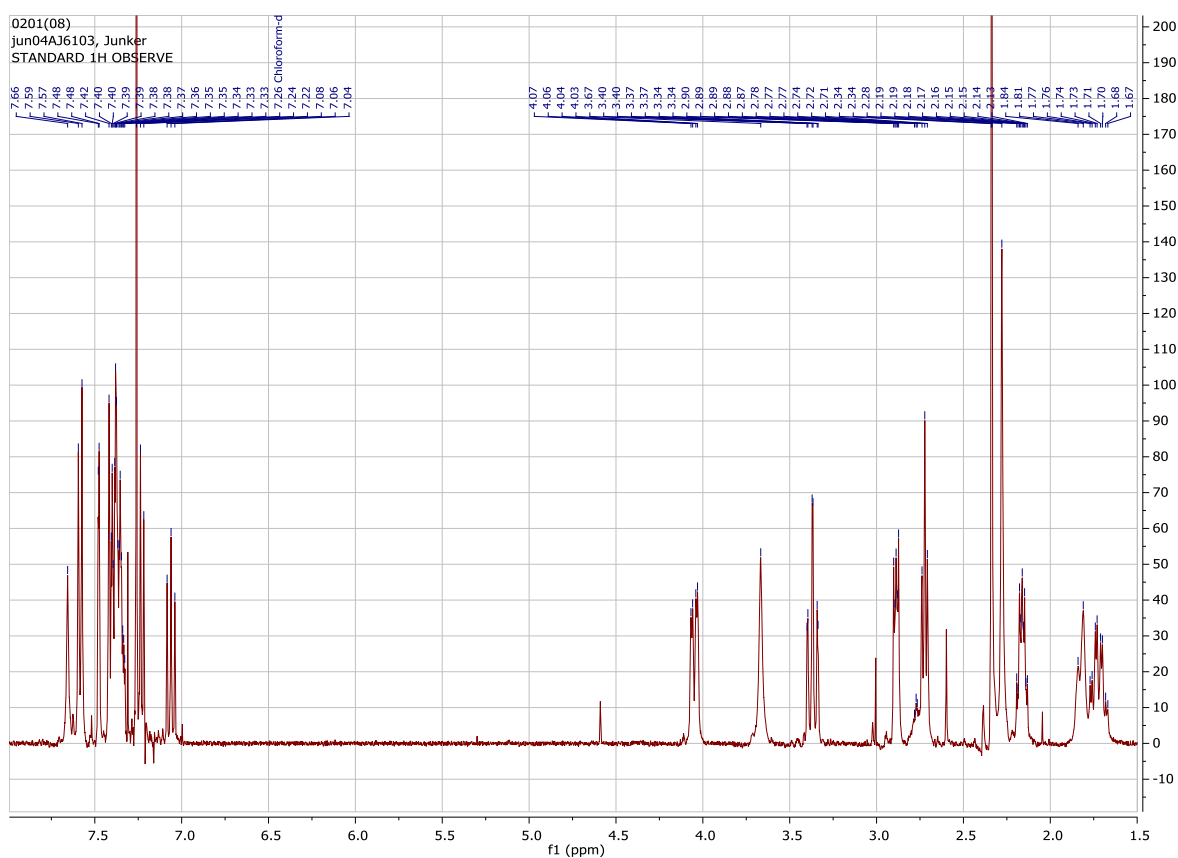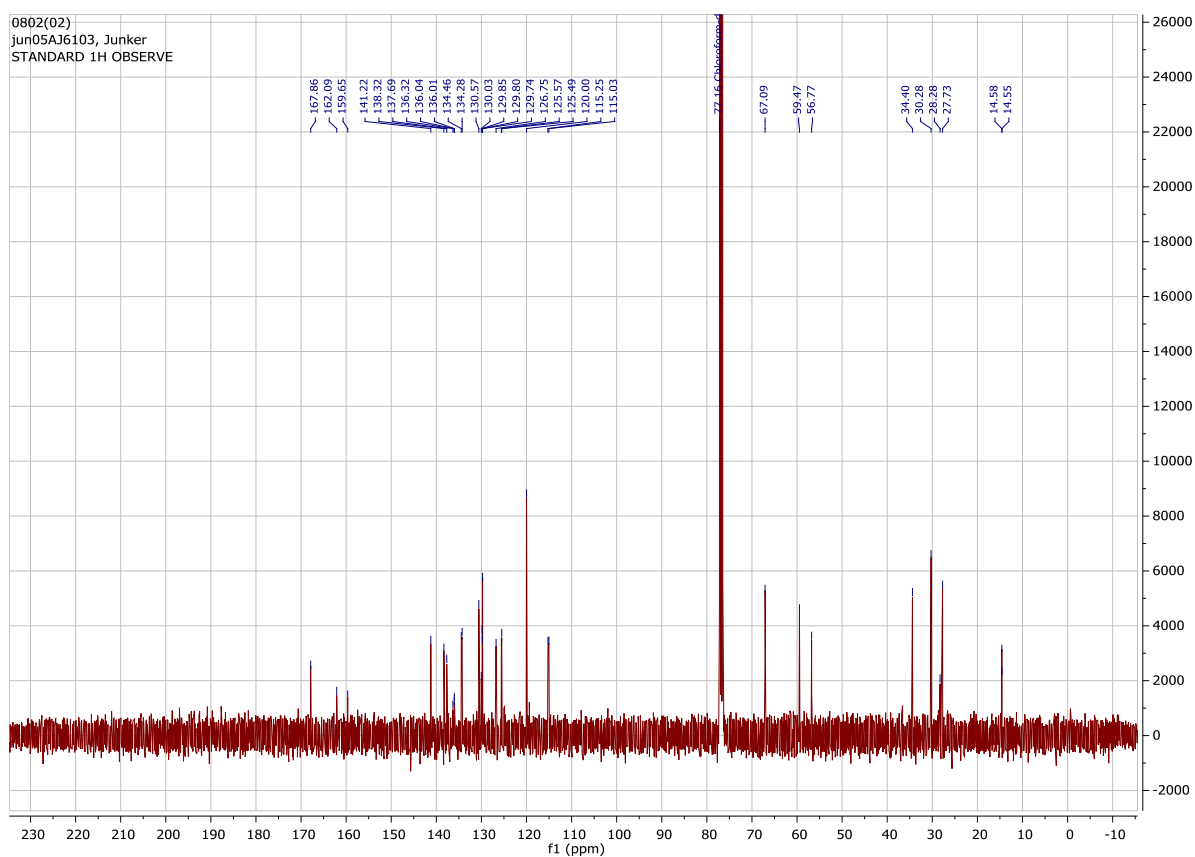



# HPLC

Analyzed: 06.04.11 22:38

Reported: 08.04.11 07:59

Processed: 08.04.11 07:59

Data Path: D:\WIN32APP\HSM\Chromni\DATA\2930\

Application: Chromni

Series: 2930

**Sample Name: AJ6103**

Vial Number: 7

Injection from this vial: 1 of 1

Vial Type: UNK

Volume: 5,0 ul

Chrom Type: HPLC Channel : 1

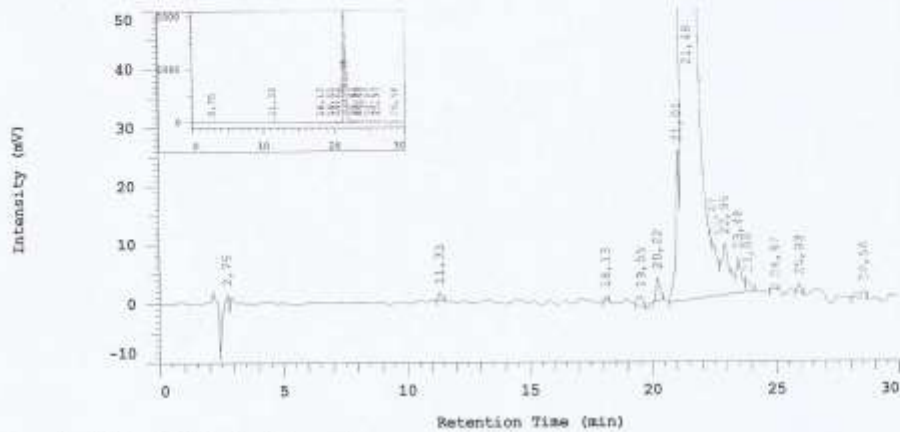

Acquisition Method: Chromni

Blank Subtr Sample Name: ACN

Column Type: 010

Solvent A: Wasser + 0,05%TFA

Developed by: Jens

Solvent B: ACN + 0,05%TFA

| No. | RT    | Area     | Conc 1  | BC |
|-----|-------|----------|---------|----|
| 1   | 2,75  | 0        | 0,000   |    |
| 2   | 11,33 | 13420    | 0,027   | MC |
| 3   | 18,13 | 7228     | 0,015   | MC |
| 4   | 19,55 | 27104    | 0,054   | MC |
| 5   | 20,22 | 40302    | 0,081   | MC |
| 6   | 21,05 | 235918   | 0,474   | MC |
| 7   | 21,48 | 48993769 | 98,441  | MC |
| 8   | 22,47 | 122196   | 0,246   | MC |
| 9   | 22,95 | 167799   | 0,337   | MC |
| 10  | 23,48 | 84561    | 0,170   | MC |
| 11  | 23,88 | 25720    | 0,052   | MC |
| 12  | 24,97 | 10467    | 0,021   | BB |
| 13  | 25,93 | 14890    | 0,030   | MC |
| 14  | 28,56 | 26122    | 0,052   | BB |
|     |       | 49769496 | 100,000 |    |

Peak rejection level: 0

## Generic Display Report

## Analysis Info

Analysis Name D:\Data\IPMC\PharmChemie\Routine\2011\_3\WJU\_AJ6101.d  
Method Kurz\_pos\_MS\_low.m  
Sample Name AJ6101  
Comment Junker  
ESI-Direkt  
Kalibration mit Li-Formate

Acquisition Date 3/31/2011 8:32:06 AM

Operator Meiners  
Instrument micrOTOF-Q II

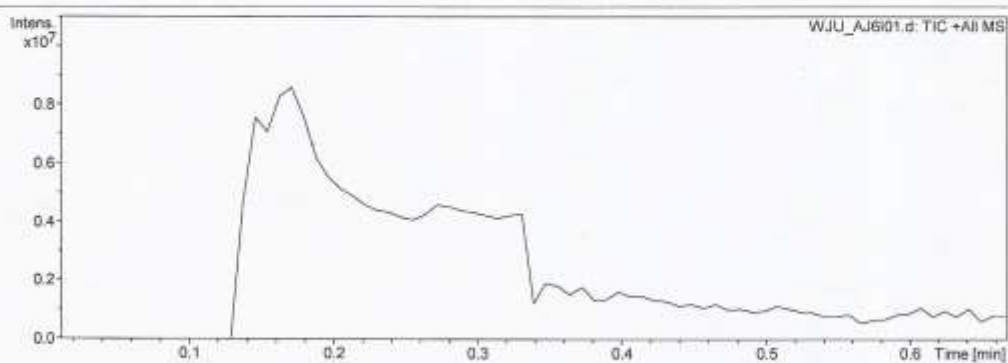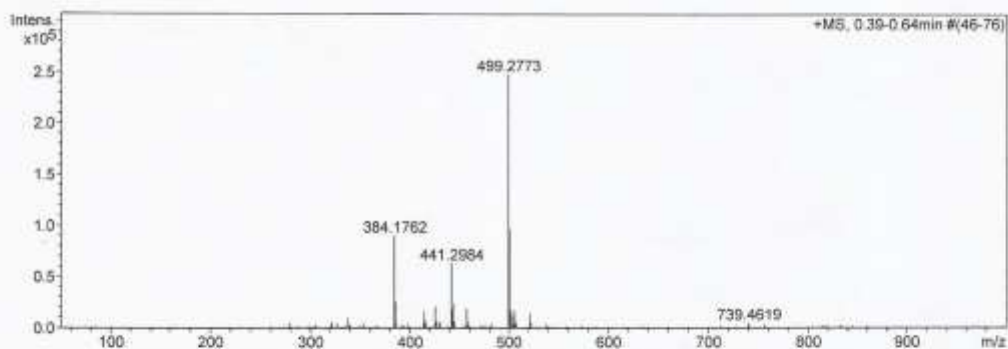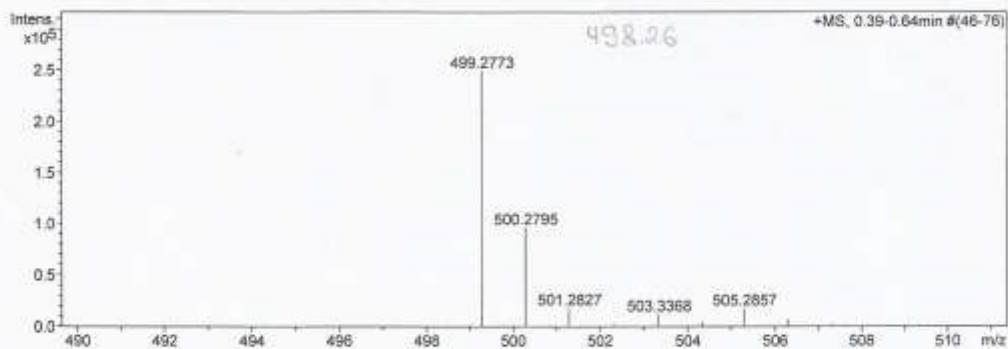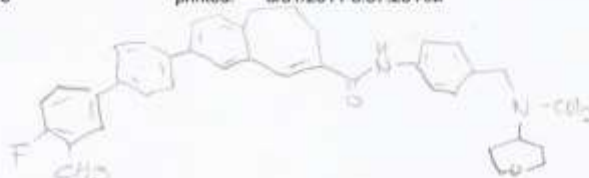

# Mass Spectrum SmartFormula Report

## Analysis Info

Analysis Name D:\Data\IPMC\PharmChemie\Routine\2011\_3\WJU\_AJ6I01.d  
 Method Kurz\_pos\_MS\_low.m  
 Sample Name AJ6I01  
 Comment Junker  
 ESI-Direkt  
 Kalibration mit Li-Formate

Acquisition Date 3/31/2011 8:32:06 AM

Operator Meiners

Instrument / Ser# micrOTOF-Q II 10252

## Acquisition Parameter

|             |            |                       |           |                  |           |
|-------------|------------|-----------------------|-----------|------------------|-----------|
| Source Type | ESI        | Ion Polarity          | Positive  | Set Nebulizer    | 5.0 Bar   |
| Focus       | Not active | Set Capillary         | 4500 V    | Set Dry Heater   | 220 °C    |
| Scan Begin  | 50 m/z     | Set End Plate Offset  | -500 V    | Set Dry Gas      | 9.0 l/min |
| Scan End    | 1000 m/z   | Set Collision Cell RF | 500.0 Vpp | Set Divert Valve | Waste     |

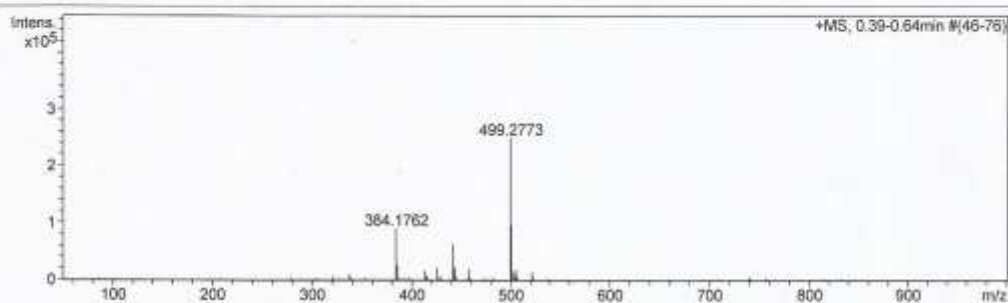

| Meas. m/z | # | Formula                                                        | m/z      | err [mDa] | err [ppm] | mSigma | rdb  | e <sup>-</sup> Conf | N-Rule | I      |
|-----------|---|----------------------------------------------------------------|----------|-----------|-----------|--------|------|---------------------|--------|--------|
| 499.2773  | 1 | C <sub>34</sub> H <sub>37</sub> F <sub>2</sub> O               | 499.2807 | 3.4       | 6.9       | 6.9    | 15.5 | even                | ok     | 248084 |
|           | 2 | C <sub>37</sub> H <sub>36</sub> F                              | 499.2796 | 2.3       | 4.6       | 10.6   | 19.5 | even                | ok     |        |
|           | 3 | C <sub>32</sub> H <sub>36</sub> FN <sub>2</sub> O <sub>2</sub> | 499.2755 | -1.7      | -3.4      | 14.1   | 15.5 | even                | ok     |        |

± 5 mDa ± 50 ppm

2-(4-Hydroxy-3-methylphenyl)-N-{4-[N-methyl-N-(tetrahydro-2H-pyran-4-yl)aminomethyl]phenyl}-6,7-dihydro-5H-benzo[7]annulene-8-carboxamide (**9o**)

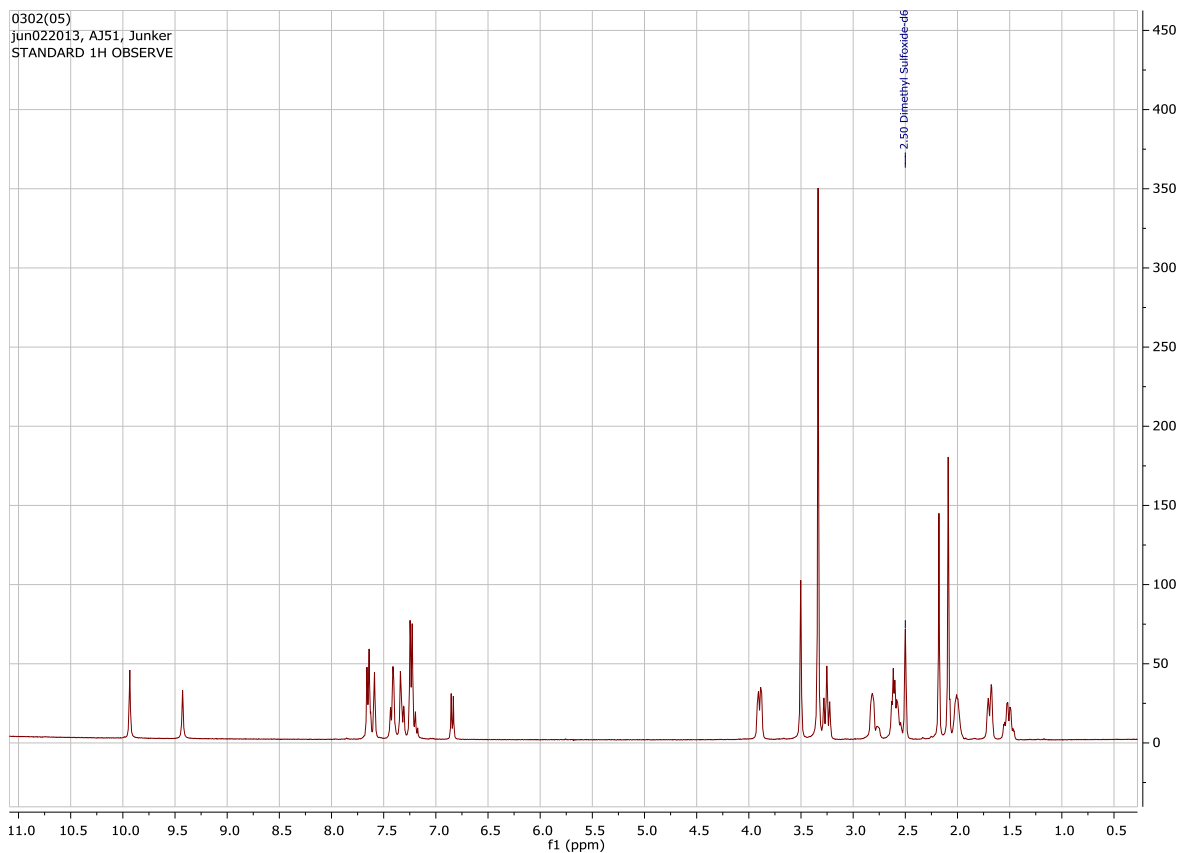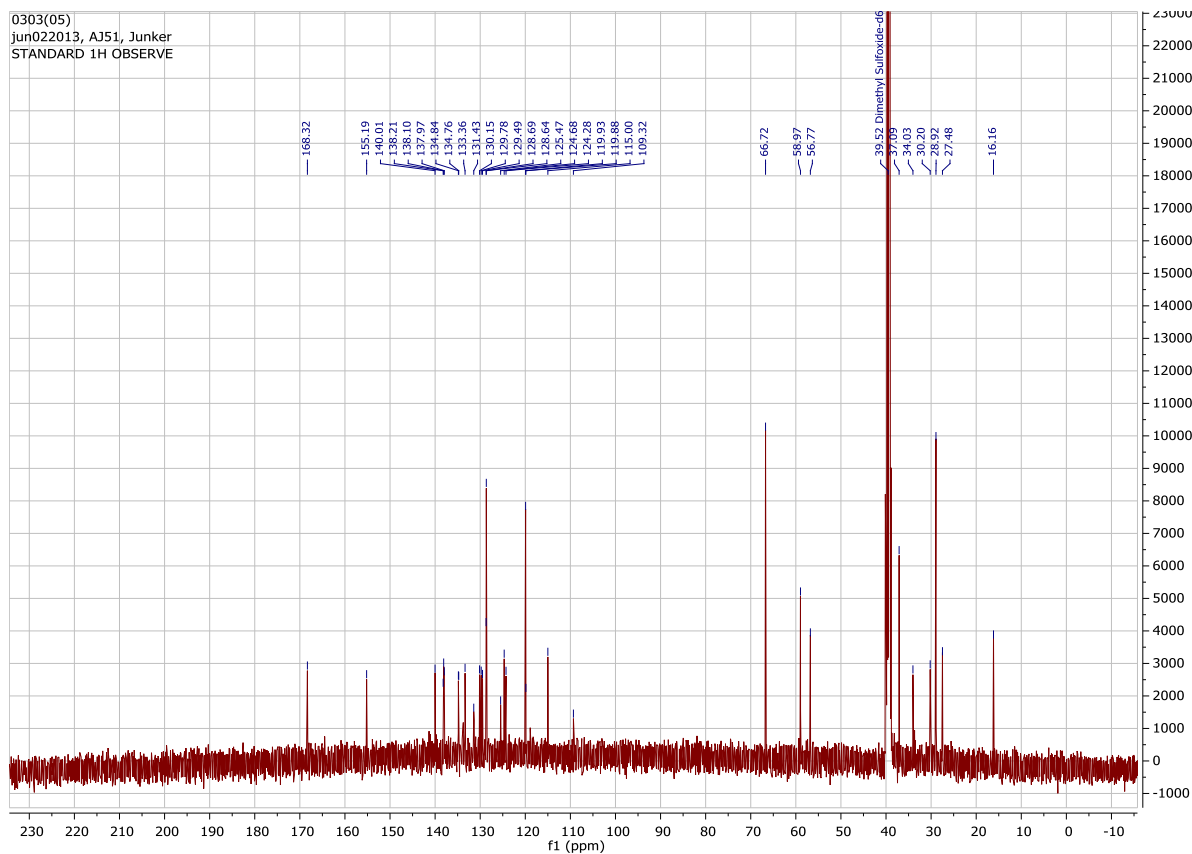

S113

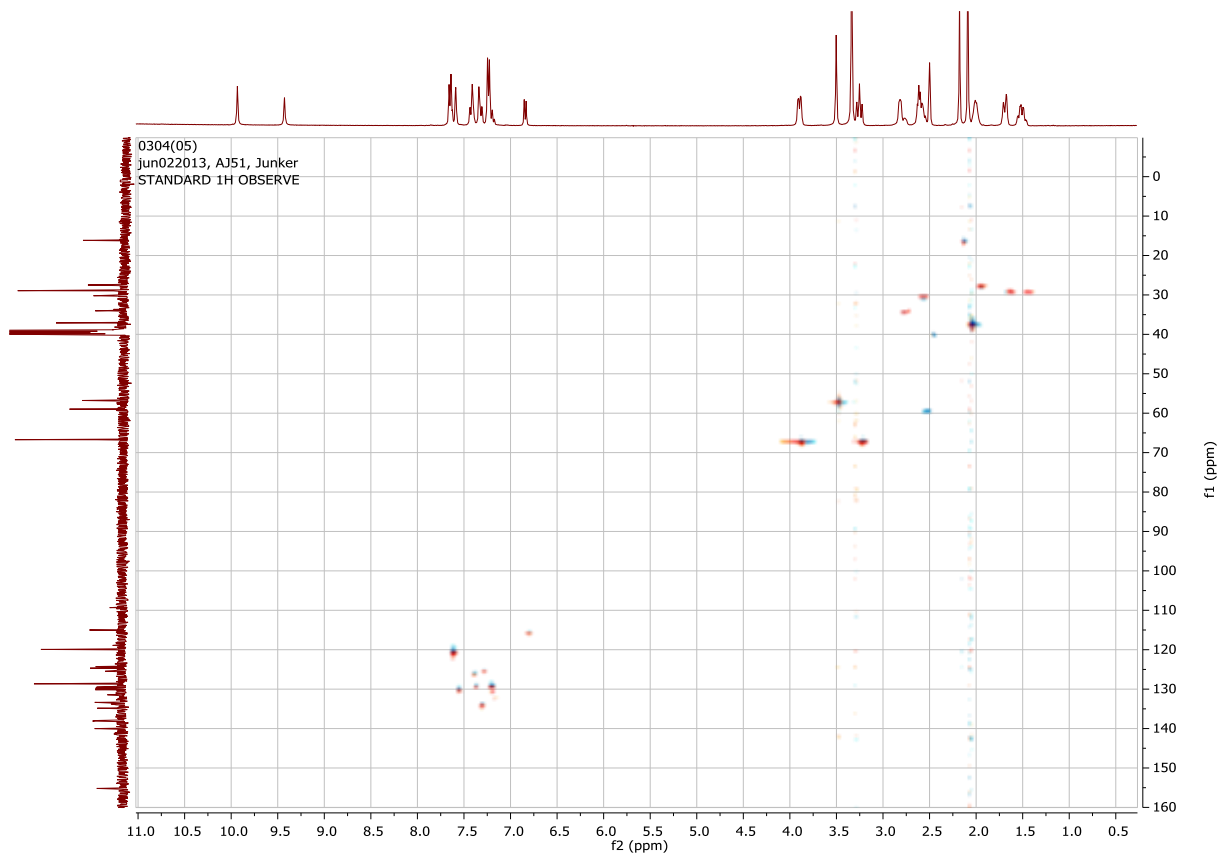

## HPLC

Analyzed: 04.08.11 03:37

Reported: 04.08.11 13:46

Processed: 04.08.11 13:46

Data Path: D:\WIN32APP\HSM\Chromni\DATA\3414\

Application: Chromni

Series:3414

**Sample Name: AJ5101**

Vial Number: 12

Injection from this vial: 1 of 1

Vial Type: UNK

Volume: 5,0 ul

Chrom Type: HPLC Channel : 1

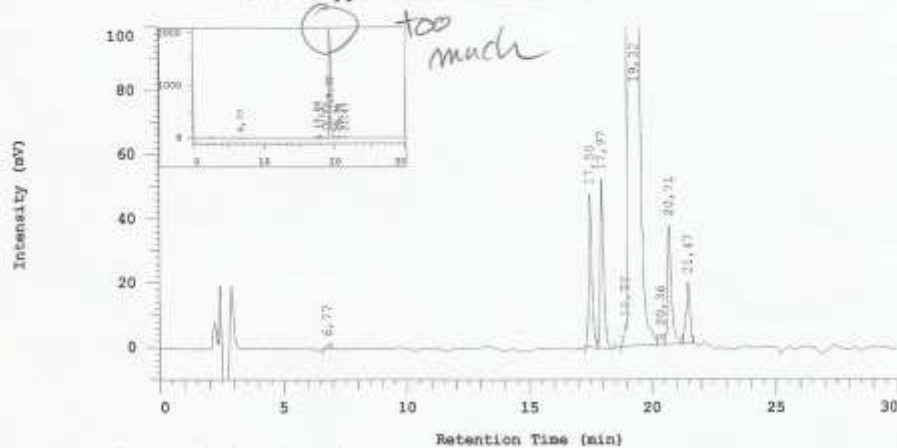

Acquisition Method: Chromni

Blank Subtr Sample Name: ACN

Column Type: 010

Solvent A: Wasser + 0,05%TFA

Developed by: Jens

Solvent B: ACN + 0,05%TFA

| No. | RT    | Area     | Conc 1  | BC |
|-----|-------|----------|---------|----|
| 1   | 6,77  | 11420    | 0,028   | MC |
| 2   | 17,50 | 437070   | 1,063   | EV |
| 3   | 17,97 | 485438   | 1,181   | VB |
| 4   | 18,92 | 50137    | 0,122   | MC |
| 5   | 19,32 | 39483280 | 96,045  | MC |
| 6   | 20,36 | 36383    | 0,089   | MC |
| 7   | 20,71 | 398976   | 0,971   | MC |
| 8   | 21,47 | 206541   | 0,502   | MC |
|     |       | 41109245 | 100,000 |    |

Peak rejection level: 0

## Generic Display Report

## Analysis Info

Analysis Name D:\Data\IPMC\PharmChemie\Routine\APCI\12\_09\WJU\_AJ51.d  
Method APCI\_directprobe\_positiv.m  
Sample Name AJ51  
Comment Junker  
APCI-Direkt  
Kalibrationn mit Fettsaeureestern

Acquisition Date 9/11/2012 9:34:38 AM

Operator

Sender

Instrument

micrOTOF-Q II

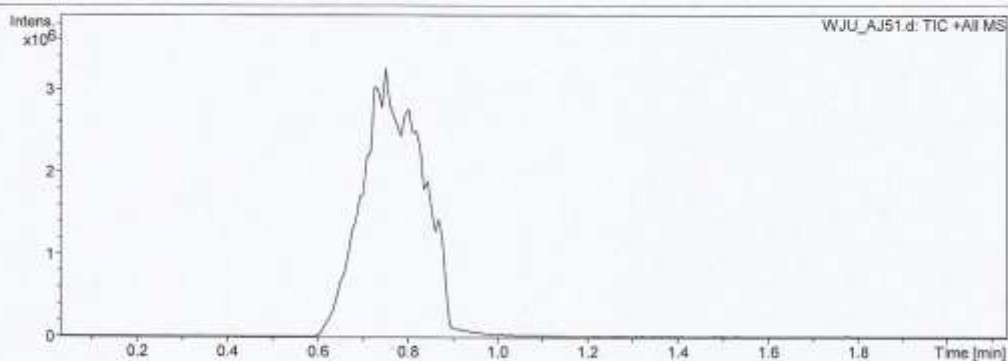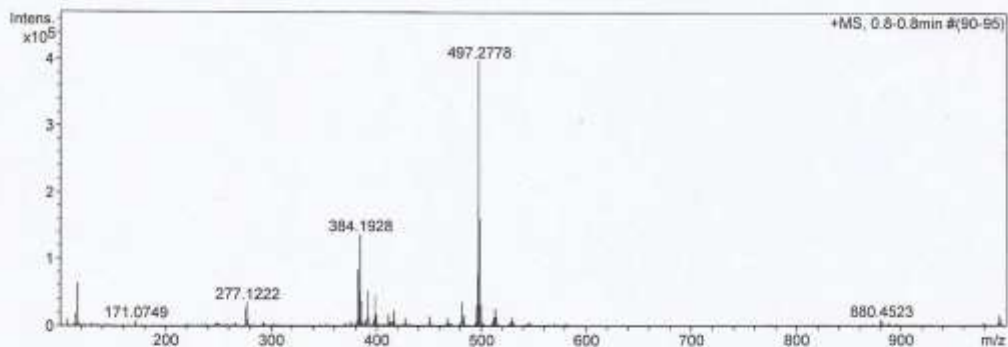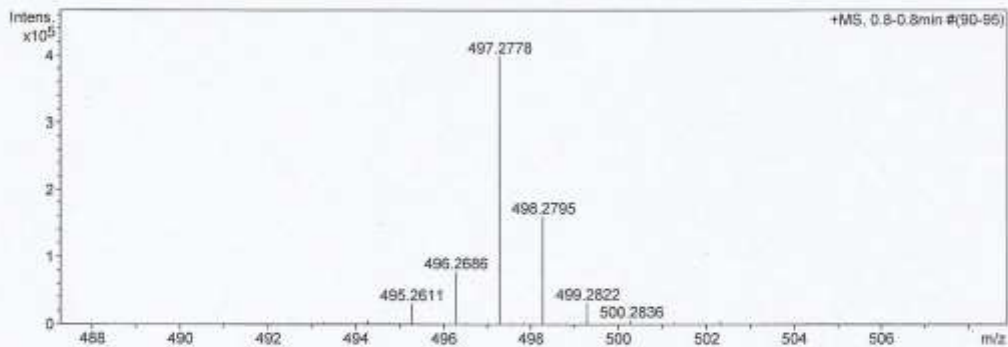

# Mass Spectrum SmartFormula Report

## Analysis Info

Analysis Name D:\Data\IPMC\PharmChemie\Routine\APCI\12\_09\WJU\_AJ51.d  
 Method APCI\_directprobe\_positiv.m  
 Sample Name AJ51  
 Comment Junker  
 APCI-Direkt  
 Kalibrations mit Fettsäureestern

Acquisition Date 9/11/2012 9:34:38 AM

Operator Sendker  
 Instrument / Ser# micrOTOF-Q II 10252

## Acquisition Parameter

|             |            |                       |           |                  |           |
|-------------|------------|-----------------------|-----------|------------------|-----------|
| Source Type | APCI       | Ion Polarity          | Positive  | Set Nebulizer    | 0.7 Bar   |
| Focus       | Not active | Set Capillary         | 4000 V    | Set Dry Heater   | 200 °C    |
| Scan Begin  | 100 m/z    | Set End Plate Offset  | -500 V    | Set Dry Gas      | 3.0 l/min |
| Scan End    | 1000 m/z   | Set Collision Cell RF | 130.0 Vpp | Set Divert Valve | Waste     |

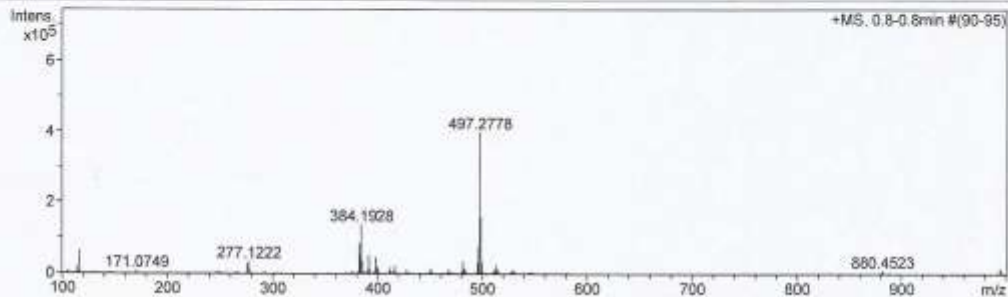

| Meas. m/z | # | Formula           | Score  | m/z      | err (mDa) | err (ppm) | mSigma | rdB  | e <sup>-</sup> Conf | N-Rule |
|-----------|---|-------------------|--------|----------|-----------|-----------|--------|------|---------------------|--------|
| 497.2778  | 1 | C 37 H 37 O       | 1.10   | 497.2839 | 6.1       | 12.3      | 2.9    | 19.5 | even                | ok     |
|           | 2 | C 34 H 33 N 4     | 0.04   | 497.2700 | -7.8      | -15.7     | 8.4    | 20.5 | even                | ok     |
|           | 3 | C 32 H 37 N 2 O 3 | 100.00 | 497.2799 | 2.1       | 4.2       | 22.2   | 15.5 | even                | ok     |



2-[4-(Hydroxymethyl)phenyl]-N-{4-[N-methyl-N-(tetrahydro-2H-pyran-4-yl)aminomethyl]phenyl}-6,7-dihydro-5H-benzo[7]annulene-8-carboxamide (**9p**)

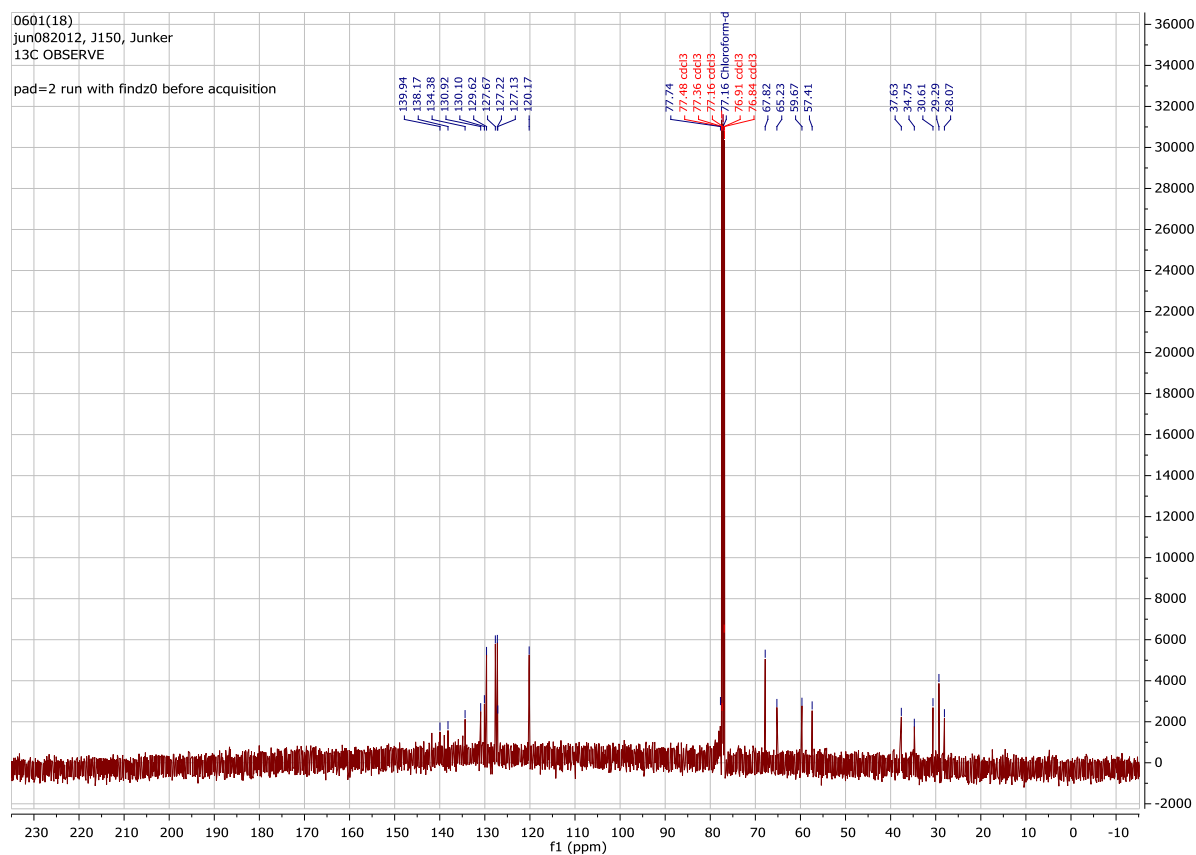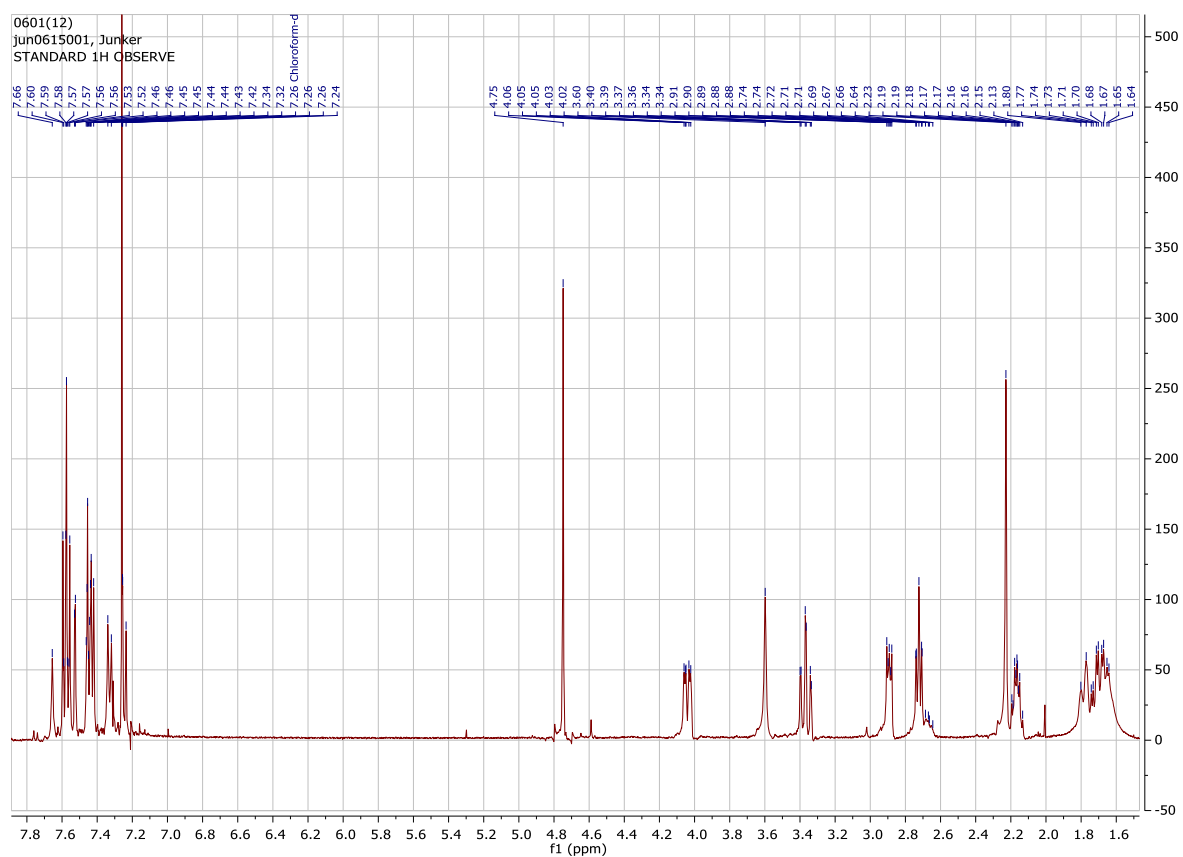

# HPLC

Analyzed: 04.08.11 05:42

Reported: 04.08.11 13:50

Processed: 04.08.11 13:50

Data Path: D:\WIN32APP\HSM\Chromni\DATA\3417\

Application: Chromni

Series:3417

Sample Name: AJ15001

Vial Number: 14

Injection from this vial: 1 of 1

Vial Type: UNK

Volume: 5,0 ul

Chrom Type: HPLC Channel : 1

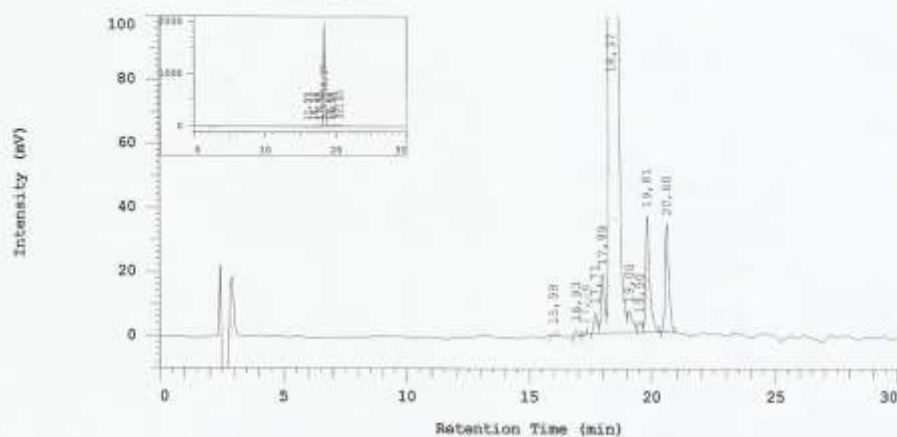

Acquisition Method: Chromni

Blank Subtr Sample Name: ACN

Column Type: 010

Solvent A: Wasser + 0,05%TFA

Developed by: Jens

Solvent B: ACN + 0,05%TFA

| No. | RT    | Area     | Conc 1  | BC |
|-----|-------|----------|---------|----|
| 1   | 15,99 | 7672     | 0,028   | MC |
| 2   | 16,93 | 16812    | 0,061   | MC |
| 3   | 17,26 | 5207     | 0,019   | MC |
| 4   | 17,71 | 57119    | 0,209   | MC |
| 5   | 17,99 | 173110   | 0,632   | MC |
| 6   | 18,37 | 26258558 | 95,867  | MC |
| 7   | 19,08 | 89935    | 0,328   | MC |
| 8   | 19,50 | 34927    | 0,128   | MC |
| 9   | 19,81 | 411366   | 1,502   | MC |
| 10  | 20,60 | 335801   | 1,226   | MC |
|     |       | 27390507 | 100,000 |    |

Peak rejection level: 0

## Generic Display Report

## Analysis Info

Analysis Name D:\Data\IPMC\PharmChemie\Routine\APCI\12\_09\WJU\_AJ150.d  
Method APCI\_directprobe\_positiv.m  
Sample Name AJ150  
Comment Junker  
APCI-Direkt  
Kalibrations mit Fettsaeureestern

Acquisition Date 9/11/2012 9:41:50 AM

Operator  
Instrument micrOTOF-Q II

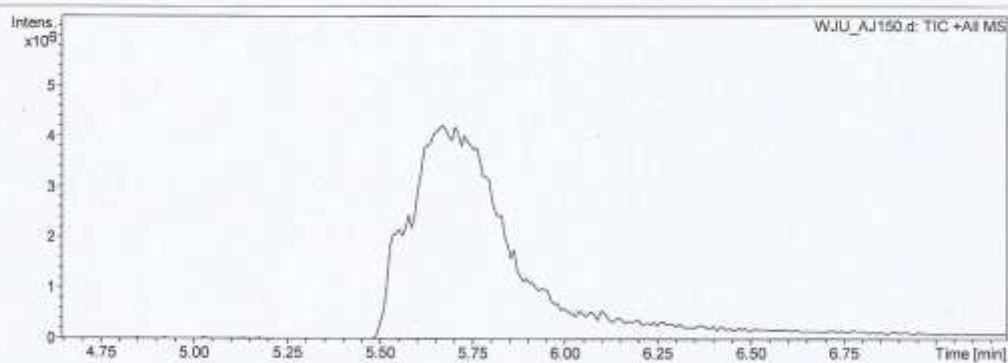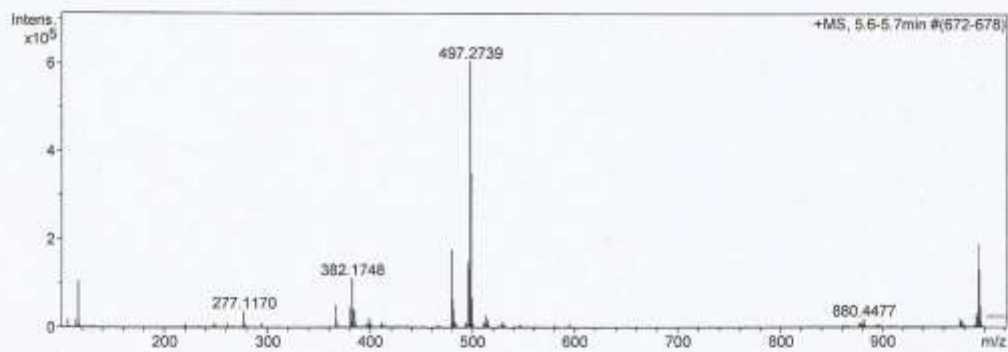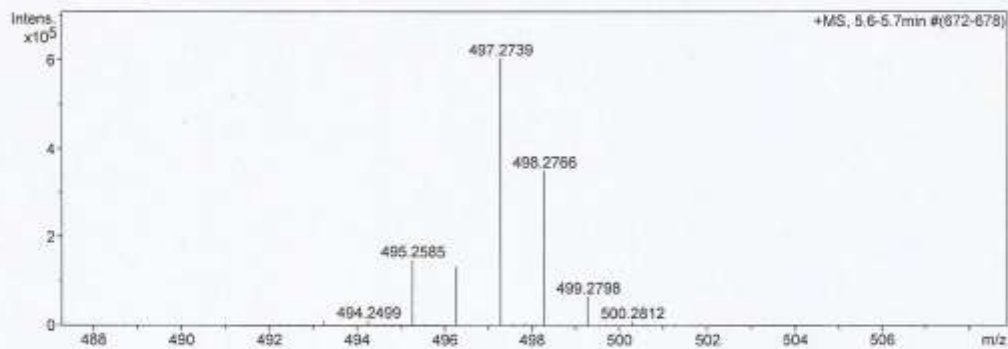

# Mass Spectrum SmartFormula Report

## Analysis Info

Analysis Name D:\Data\IPMC\PharmChemie\Routine\APCI\12\_09\WJU\_AJ150.d Acquisition Date 9/11/2012 9:41:50 AM  
 Method APCI\_directprobe\_positiv.m Operator Sender  
 Sample Name AJ150 Instrument / Ser# micrOTOF-Q II 10252  
 Comment Junker  
 APCI-Direkt  
 Kalibrionn mit Fettsäureestern

## Acquisition Parameter

Source Type APCI Ion Polarity Positive Set Nebulizer 0.7 Bar  
 Focus Not active Set Capillary 4000 V Set Dry Heater 200 °C  
 Scan Begin 100 m/z Set End Plate Offset -500 V Set Dry Gas 3.0 l/min  
 Scan End 1000 m/z Set Collision Cell RF 130.0 Vpp Set Divert Valve Waste

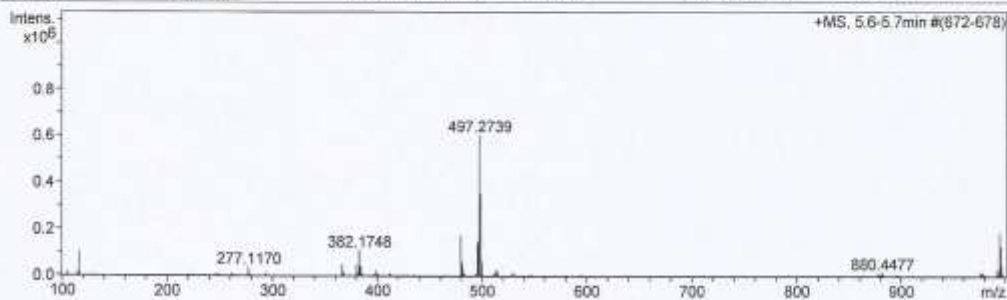

| Meas. m/z | # | Formula                                                       | Score  | m/z      | err [mDa] | err [ppm] | mSigma | rdB  | e <sup>-</sup> Conf | N-Rule |
|-----------|---|---------------------------------------------------------------|--------|----------|-----------|-----------|--------|------|---------------------|--------|
| 497.2739  | 1 | C <sub>34</sub> H <sub>33</sub> N <sub>4</sub>                | 100.00 | 497.2700 | -4.0      | -8.0      | 97.9   | 20.5 | even                | ok     |
|           | 2 | C <sub>33</sub> H <sub>37</sub> O <sub>4</sub>                | 9.17   | 497.2686 | -5.3      | -10.7     | 110.3  | 15.5 | even                | ok     |
|           | 3 | C <sub>32</sub> H <sub>37</sub> N <sub>2</sub> O <sub>3</sub> | 3.23   | 497.2799 | 5.9       | 11.9      | 112.3  | 15.5 | even                | ok     |

2-(5-Formylthiophen-2-yl)-N-{4-[(methyl-N-(tetrahydro-2H-pyran-4-yl)aminomethyl]phenyl}-6,7-dihydro-5H-benzo[7]annulene-8-carboxamide (**9v**)

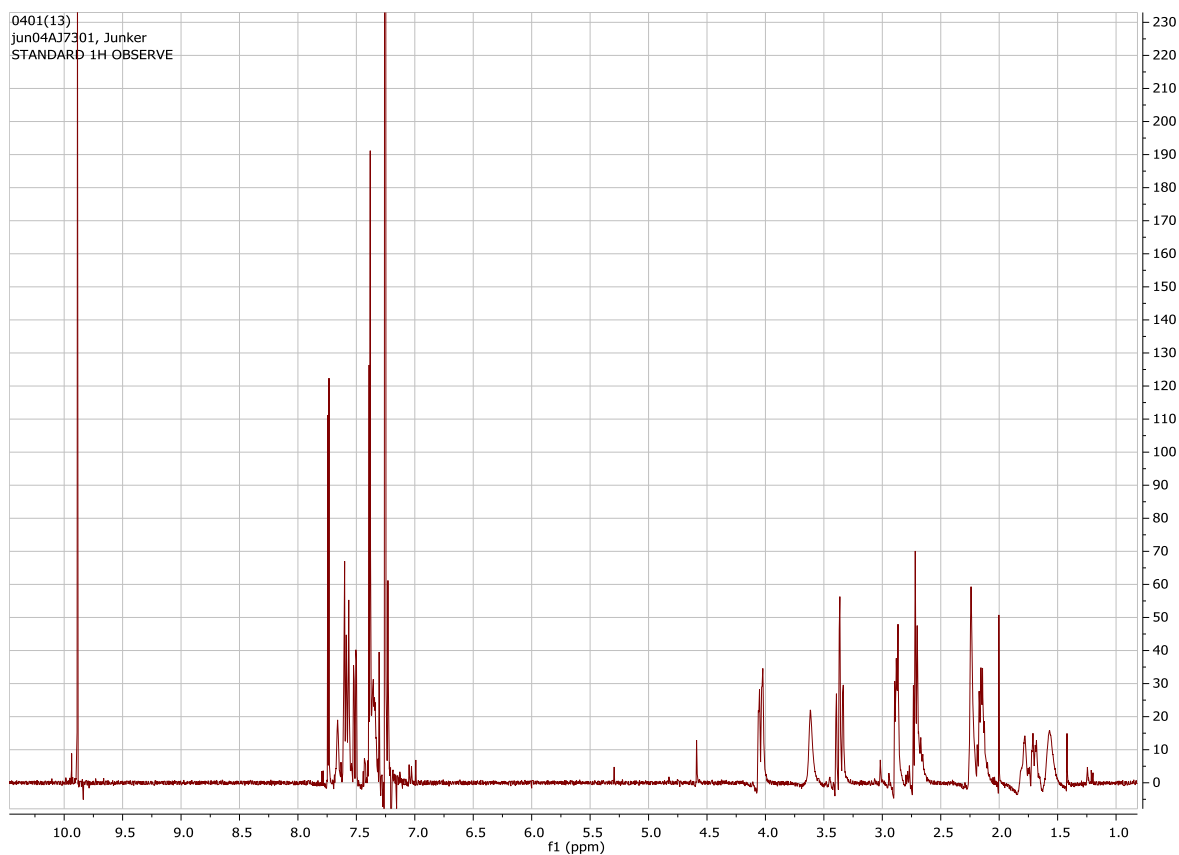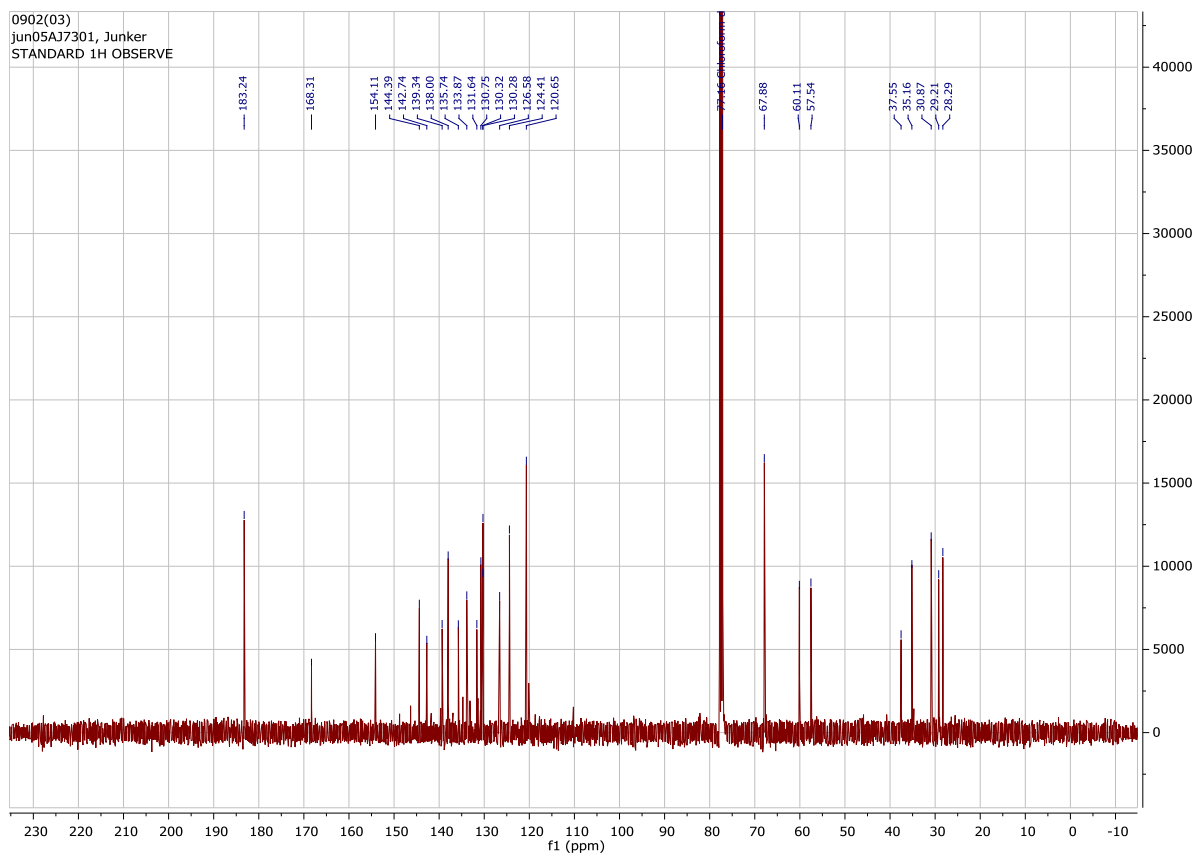

# HPLC

Analyzed: 14.04.11 01:25

Reported: 14.04.11 14:02  
Processed: 14.04.11 14:02Data Path: D:\WIN32APP\HSM\Chromni\DATA\2964\  
Application: Chromni

Sample Name: AJ7301

Series: 2964  
Vial Number: 10  
Vial Type: UNK  
Volume: 5,0 u1

Injection from this vial: 1 of 1

Chrom Type: HPLC Channel : 1

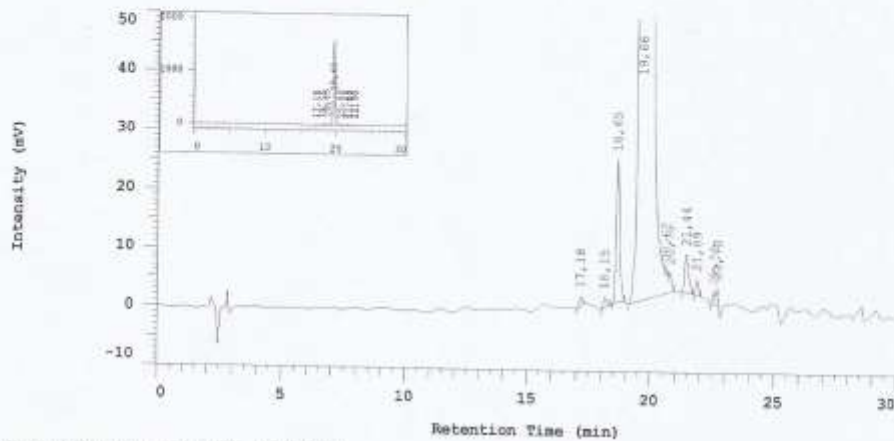

Acquisition Method: Chromni

Blank Subtr Sample Name: ACN

Column Type: 010

Solvent A: Wasser + 0,05%TFA

Developed by: Jens

Solvent B: ACN + 0,05%TFA

| No. | RT    | Area     | Conc 1  | BC |
|-----|-------|----------|---------|----|
| 1   | 17,18 | 12357    | 0,044   | MC |
| 2   | 18,15 | 15586    | 0,056   | MC |
| 3   | 18,65 | 229788   | 0,822   | MC |
| 4   | 19,66 | 27517846 | 98,442  | MC |
| 5   | 20,62 | 28816    | 0,103   | MC |
| 6   | 20,78 | 26502    | 0,095   | MC |
| 7   | 21,44 | 72029    | 0,258   | MC |
| 8   | 21,89 | 21067    | 0,075   | MC |
| 9   | 22,55 | 13198    | 0,047   | MC |
| 10  | 22,70 | 16295    | 0,058   | MC |
|     |       | 27953484 | 100,000 |    |

Peak rejection level: 0

## Generic Display Report

## Analysis Info

Analysis Name D:\Data\IPMC\PharmChemie\Routine\2011\_5\WJU\_AJ7301.d  
Method APCI\_directprobe\_default.m  
Sample Name AJ7301  
Comment Junker  
APCI-Direkt  
Kalibration mit Fettsaeureestern

Acquisition Date 5/2/2011 2:41:29 PM

Operator Meiners  
Instrument micrOTOF-Q II

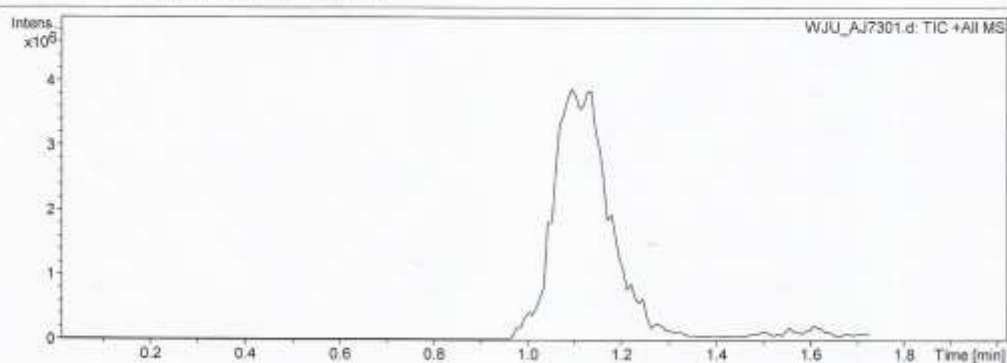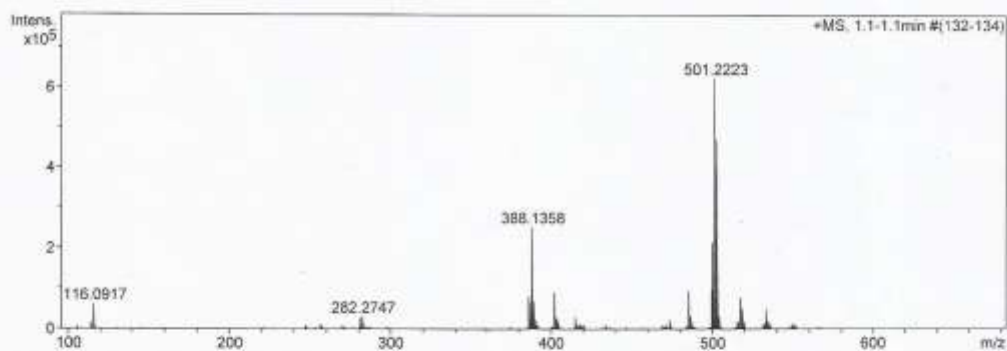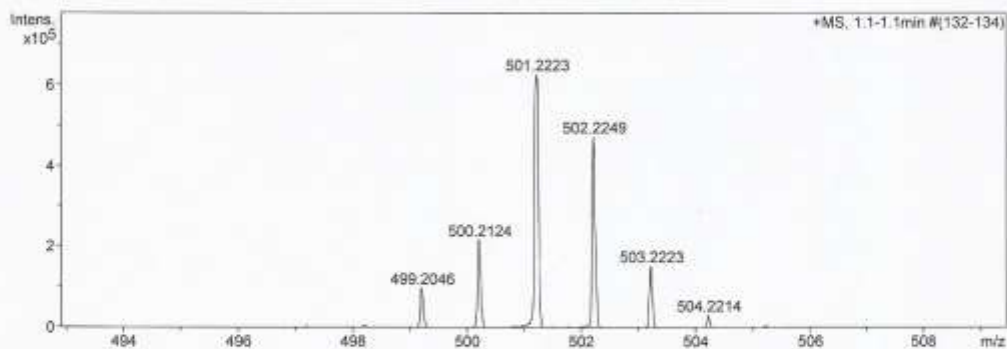

# Mass Spectrum SmartFormula Report

## Analysis Info

Analysis Name D:\Data\IPMC\PharmChemie\Routine\2011\_5\WJU\_AJ7301.d  
 Method APCI\_directprobe\_default.m  
 Sample Name AJ7301  
 Comment Junker  
 APCI-Direkt  
 Kalibration mit Fettsaeureestern

Acquisition Date 5/2/2011 2:41:29 PM

Operator Meiners

Instrument / Ser# micrOTOF-Q II 10252

## Acquisition Parameter

|             |            |                       |           |                  |           |
|-------------|------------|-----------------------|-----------|------------------|-----------|
| Source Type | APCI       | Ion Polarity          | Positive  | Set Nebulizer    | 0.7 Bar   |
| Focus       | Not active | Set Capillary         | 4000 V    | Set Dry Heater   | 200 °C    |
| Scan Begin  | 100 m/z    | Set End Plate Offset  | -500 V    | Set Dry Gas      | 3.0 l/min |
| Scan End    | 1000 m/z   | Set Collision Cell RF | 130.0 Vpp | Set Divert Valve | Waste     |

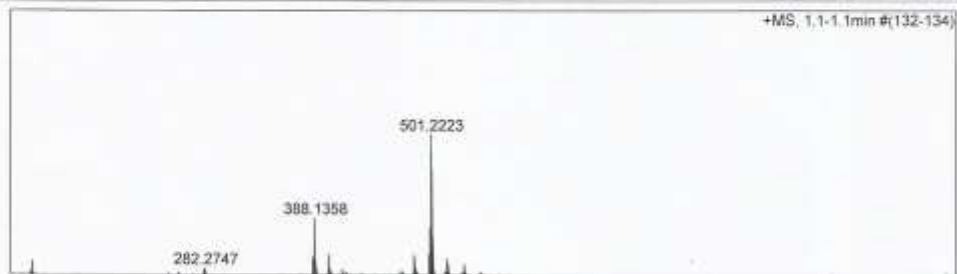

| Meas. m/z | # | Formula                                                         | Score  | m/z      | err [mDa] | err [ppm] | mSigma | rdB  | e <sup>-</sup> Conf | N-Rule |
|-----------|---|-----------------------------------------------------------------|--------|----------|-----------|-----------|--------|------|---------------------|--------|
| 501.2223  | 1 | C <sub>35</sub> H <sub>33</sub> O <sub>3</sub> S                | 100.00 | 501.2247 | 2.4       | 4.7       | 192.9  | 19.5 | even                | ok     |
|           | 2 | C <sub>30</sub> H <sub>33</sub> N <sub>2</sub> O <sub>3</sub> S | 21.62  | 501.2206 | -1.7      | -3.3      | 216.8  | 15.5 | even                | ok     |



2-(4-Methylphenyl)-N-{4-[N-methyl-N-(tetrahydro-2H-pyran-4-yl)aminomethyl]phenyl}-  
7,8-dihydro-6H-[7]annuleno[b]thiophene-5-carboxamide (**14a**)

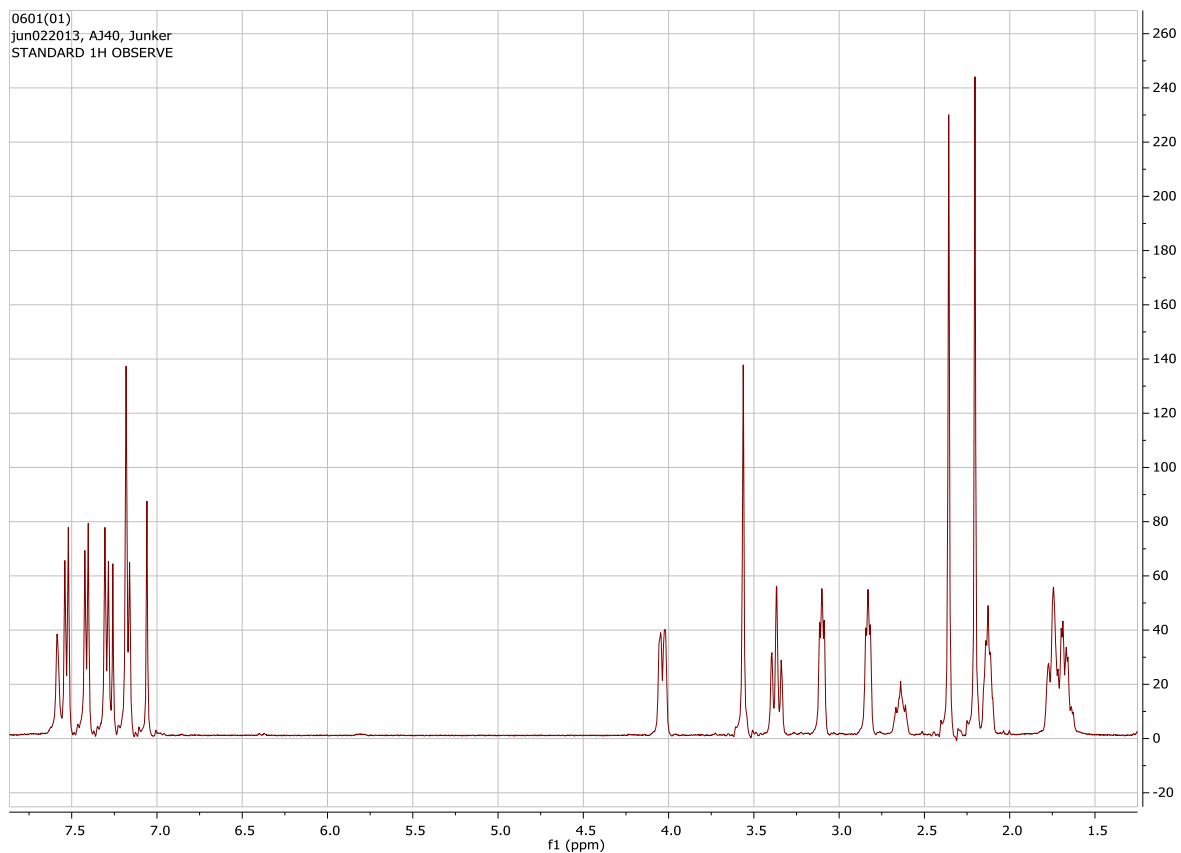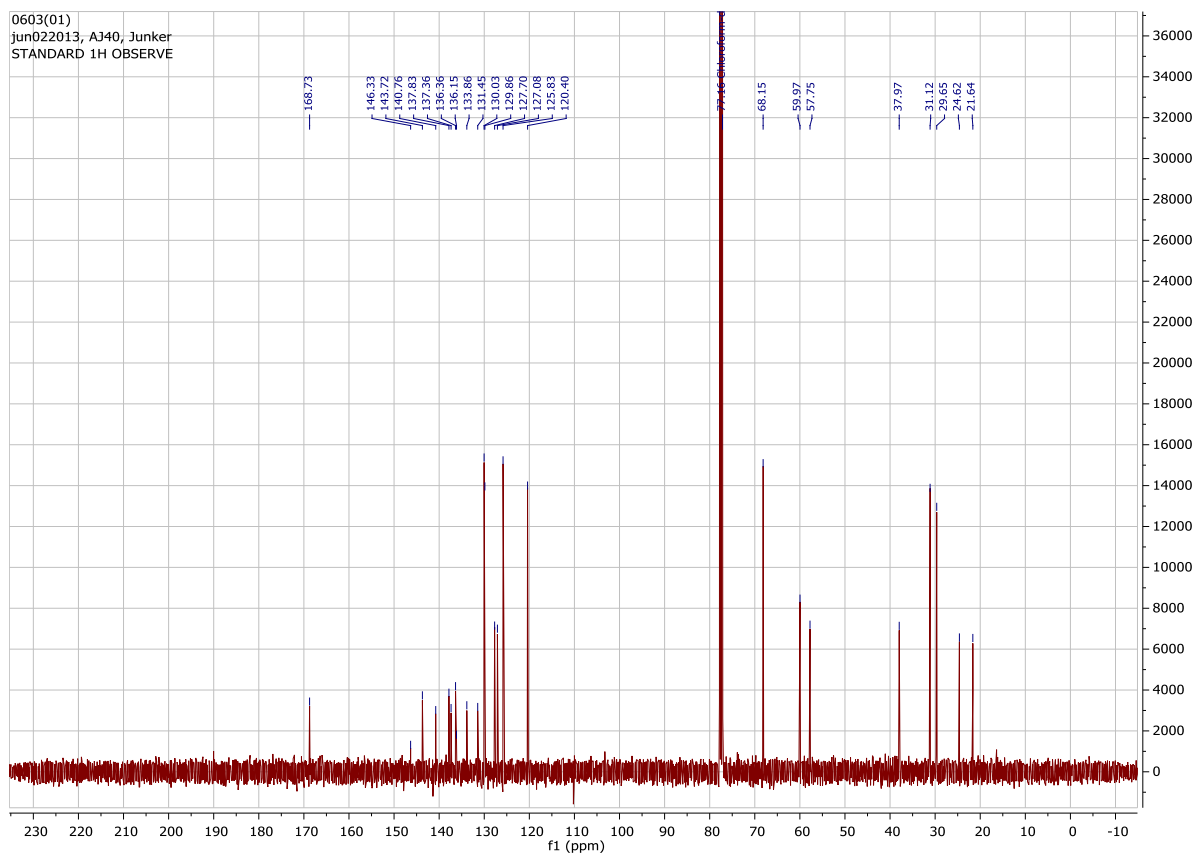

S126

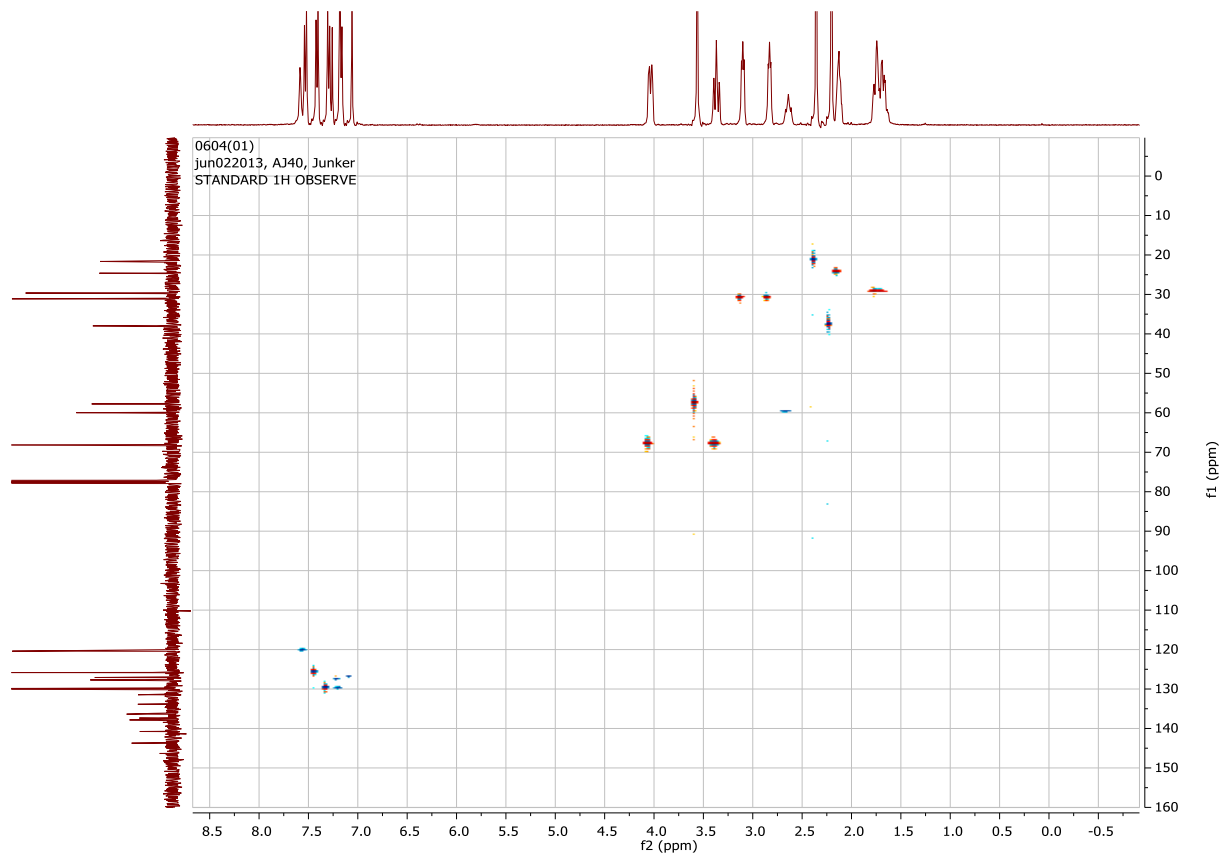

# HPLC

Analyzed: 06.02.13 19:20

Reported: 12.02.13 17:36

Processed: 12.02.13 17:36

Data Path: D:\WIN32APP\HSM\Chromni\DATA\5913\

Application: Chromni

Series: 5913

**Sample Name: AJ40**

Vial Number: 2

Injection from this vial: 1 of 1

Vial Type: UNK

Volume: 5,0 ul

Chrom Type: HPLC Channel : 1

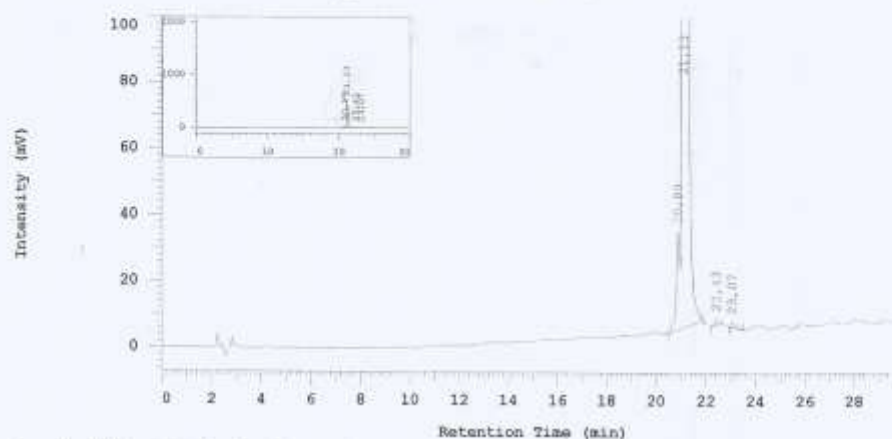

Acquisition Method: Chromni

Blank Subtr Sample Name: ACN

Column Type: 010

Solvent A: Wasser + 0,05%TFA

Developed by: Jens

Solvent B: ACN + 0,05%TFA

| No. | RT    | Area    | Conc 1  | BC |
|-----|-------|---------|---------|----|
| 1   | 20,89 | 271402  | 4,285   | MC |
| 2   | 21,13 | 6026153 | 95,148  | MC |
| 3   | 22,43 | 14036   | 0,222   | BB |
| 4   | 23,07 | 21881   | 0,345   | MC |
|     |       | 6333472 | 100,000 |    |

Peak rejection level: 0

## Generic Display Report

## Analysis Info

Analysis Name D:\Data\PMCI\PharmChemie\Routine\APCI\12\_08\WJU\_AJ40.d  
Method APCI\_directprobe\_positiv.m  
Sample Name AJ40  
Comment Junker  
APCI-Direkt  
Kalibration mit Fettsaeureestern

Acquisition Date 8/29/2012 9:35:27 AM

Operator Meiners  
Instrument micrOTOF-Q II

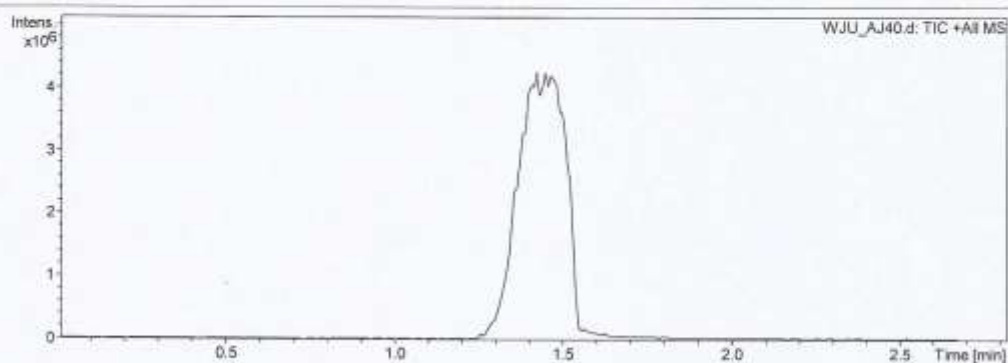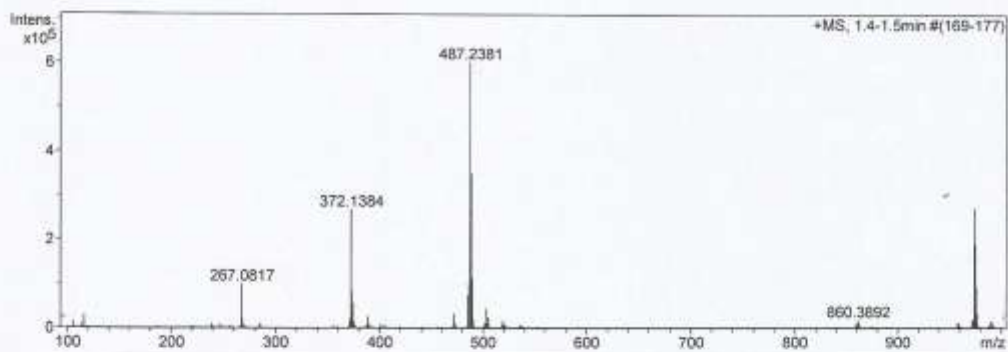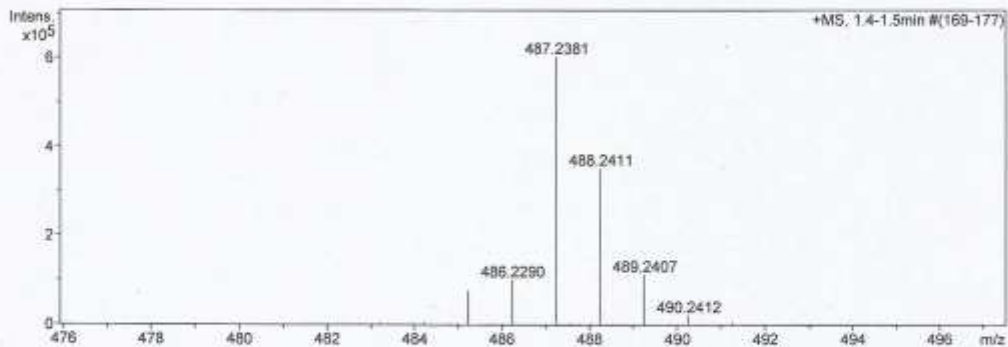

## Mass Spectrum SmartFormula Report

## Analysis Info

Analysis Name D:\Data\IPMC\PharmChemie\Routine\APCI\12\_08\WJU\_AJ40.d  
 Method APCI\_directprobe\_positiv.m  
 Sample Name AJ40  
 Comment Junker  
 APCI-Direkt  
 Kalibration mit Fettsaeureestern

Acquisition Date 8/29/2012 9:35:27 AM

Operator Meiners

Instrument / Ser# micrOTOF-Q II 10252

## Acquisition Parameter

|             |            |                       |           |                  |           |
|-------------|------------|-----------------------|-----------|------------------|-----------|
| Source Type | APCI       | Ion Polarity          | Positive  | Set Nebulizer    | 0.7 Bar   |
| Focus       | Not active | Set Capillary         | 4000 V    | Set Dry Heater   | 200 °C    |
| Scan Begin  | 100 m/z    | Set End Plate Offset  | -500 V    | Set Dry Gas      | 3.0 l/min |
| Scan End    | 1000 m/z   | Set Collision Cell RF | 130.0 Vpp | Set Divert Valve | Waste     |

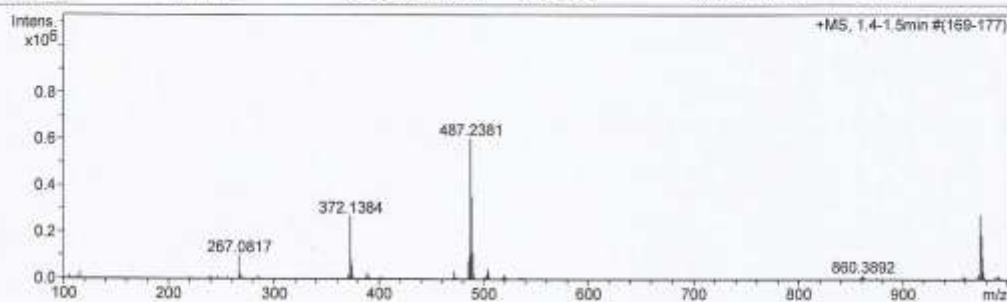

| Meas. m/z | #  | Formula                                                                       | Score  | m/z      | err [mDa] | err [ppm] | mSigma | rdB  | e <sup>-</sup> Conf | N-Rule |
|-----------|----|-------------------------------------------------------------------------------|--------|----------|-----------|-----------|--------|------|---------------------|--------|
| 487.2381  | 1  | C <sub>30</sub> H <sub>35</sub> N <sub>2</sub> O <sub>2</sub> S               | 20.76  | 487.2414 | 3.2       | 6.7       | 125.9  | 14.5 | even                | ok     |
|           | 2  | C <sub>25</sub> H <sub>43</sub> O <sub>3</sub> S <sub>3</sub>                 | 100.00 | 487.2389 | -1.2      | -2.6      | 128.8  | 4.5  | even                | ok     |
|           | 3  | C <sub>21</sub> H <sub>39</sub> N <sub>6</sub> O <sub>3</sub> S <sub>3</sub>  | 5.22   | 487.2342 | -3.9      | -8.1      | 136.6  | 6.5  | even                | ok     |
|           | 4  | C <sub>26</sub> H <sub>31</sub> N <sub>8</sub> S                              | 75.20  | 487.2387 | 0.6       | 1.1       | 138.1  | 15.5 | even                | ok     |
|           | 5  | C <sub>22</sub> H <sub>47</sub> O <sub>3</sub> S <sub>4</sub>                 | 26.36  | 487.2403 | 2.1       | 4.4       | 138.9  | -0.5 | even                | ok     |
|           | 6  | C <sub>23</sub> H <sub>35</sub> N <sub>8</sub> S <sub>2</sub>                 | 3.16   | 487.2421 | 3.9       | 8.1       | 144.6  | 10.5 | even                | ok     |
|           | 7  | C <sub>18</sub> H <sub>43</sub> N <sub>6</sub> O <sub>4</sub> S               | 40.67  | 487.2376 | -0.6      | -1.2      | 147.6  | 0.5  | even                | ok     |
|           | 8  | C <sub>25</sub> H <sub>35</sub> N <sub>4</sub> O <sub>4</sub> S               | 31.90  | 487.2374 | -0.8      | -1.6      | 149.8  | 10.5 | even                | ok     |
|           | 9  | C <sub>22</sub> H <sub>39</sub> N <sub>4</sub> O <sub>4</sub> S <sub>2</sub>  | 5.55   | 487.2407 | 2.6       | 5.3       | 156.9  | 5.5  | even                | ok     |
|           | 10 | C <sub>15</sub> H <sub>39</sub> N <sub>10</sub> O <sub>2</sub> S <sub>3</sub> | 2.47   | 487.2414 | 3.3       | 6.7       | 159.1  | 1.5  | even                | ok     |
|           | 11 | C <sub>24</sub> H <sub>39</sub> O <sub>8</sub> S                              | 5.95   | 487.2380 | -2.1      | -4.3      | 161.7  | 5.5  | even                | ok     |
|           | 12 | C <sub>21</sub> H <sub>31</sub> N <sub>10</sub> O <sub>2</sub> S              | 1.70   | 487.2347 | -3.5      | -7.1      | 161.8  | 11.5 | even                | ok     |
|           | 13 | C <sub>18</sub> H <sub>35</sub> N <sub>10</sub> O <sub>2</sub> S <sub>2</sub> | 12.21  | 487.2380 | -0.1      | -0.2      | 168.4  | 6.5  | even                | ok     |
|           | 14 | C <sub>21</sub> H <sub>43</sub> O <sub>8</sub> S <sub>2</sub>                 | 6.35   | 487.2394 | 1.3       | 2.6       | 169.2  | 0.5  | even                | ok     |
|           | 15 | C <sub>14</sub> H <sub>31</sub> N <sub>16</sub> S <sub>2</sub>                | 0.88   | 487.2354 | -2.8      | -5.7      | 180.0  | 7.5  | even                | ok     |
|           | 16 | C <sub>17</sub> H <sub>39</sub> N <sub>6</sub> O <sub>6</sub> S <sub>2</sub>  | 2.42   | 487.2387 | -1.4      | -2.9      | 180.6  | 1.5  | even                | ok     |
|           | 17 | C <sub>15</sub> H <sub>31</sub> N <sub>14</sub> O <sub>3</sub> S              | 0.18   | 487.2419 | 3.7       | 7.7       | 187.3  | 7.5  | even                | ok     |
|           | 18 | C <sub>14</sub> H <sub>35</sub> N <sub>10</sub> O <sub>7</sub> S              | 0.27   | 487.2405 | 2.4       | 4.9       | 198.9  | 2.5  | even                | ok     |
|           | 19 | C <sub>11</sub> H <sub>27</sub> N <sub>20</sub> O <sub>5</sub>                | 0.58   | 487.2392 | 1.1       | 2.2       | 201.0  | 8.5  | even                | ok     |

2-(4-Methylphenyl)-N-[2-(tetrahydro-2H-pyran-4-yl)-1,2,3,4-tetrahydroisoquinolin-7-yl]-  
7,8-dihydro-6H-[7]annuleno[b]thiophene-5-carboxamide (**14b**)

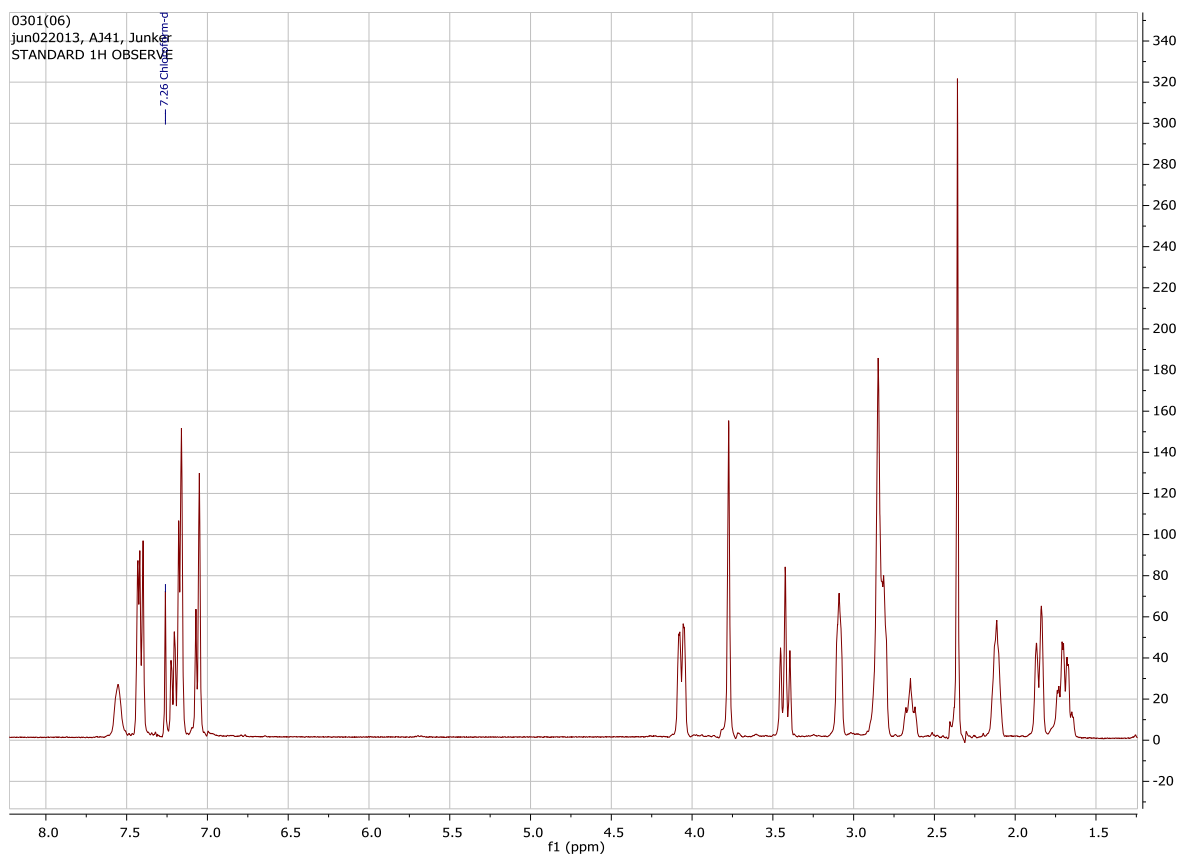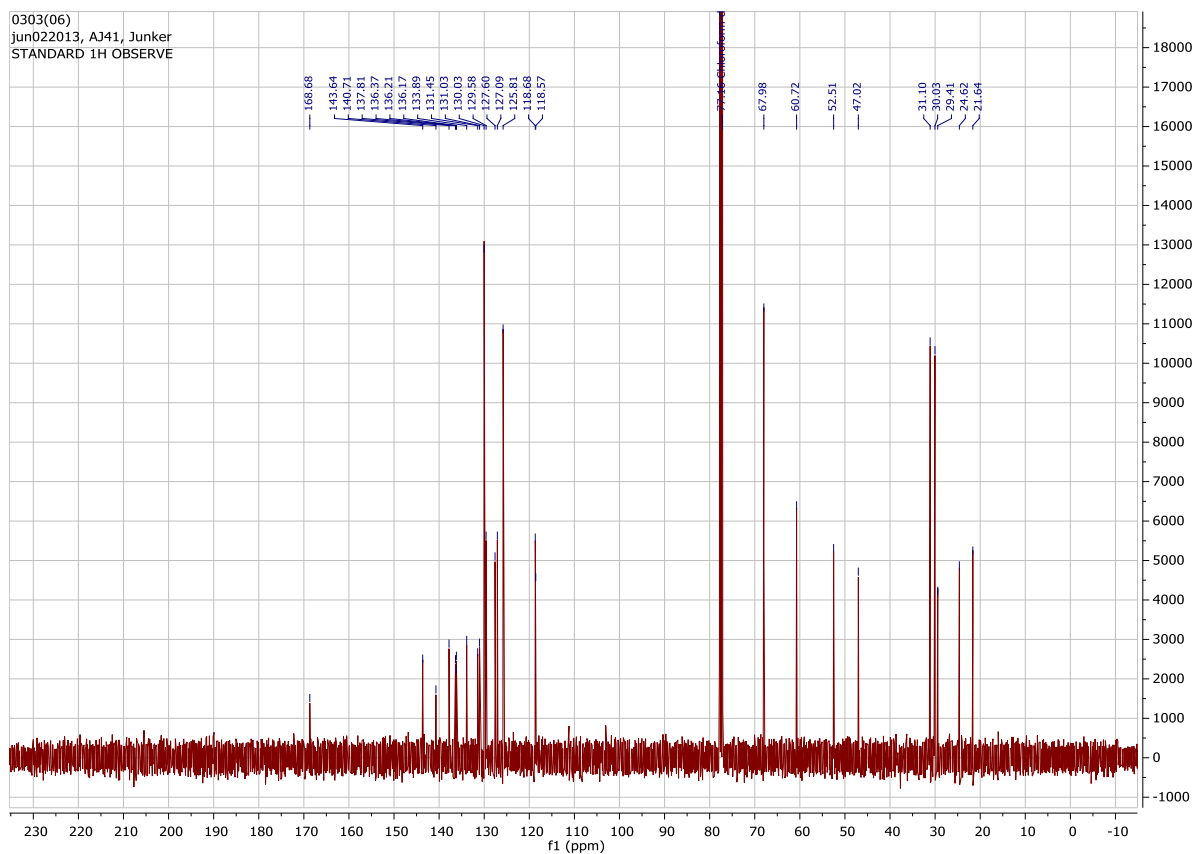

S131

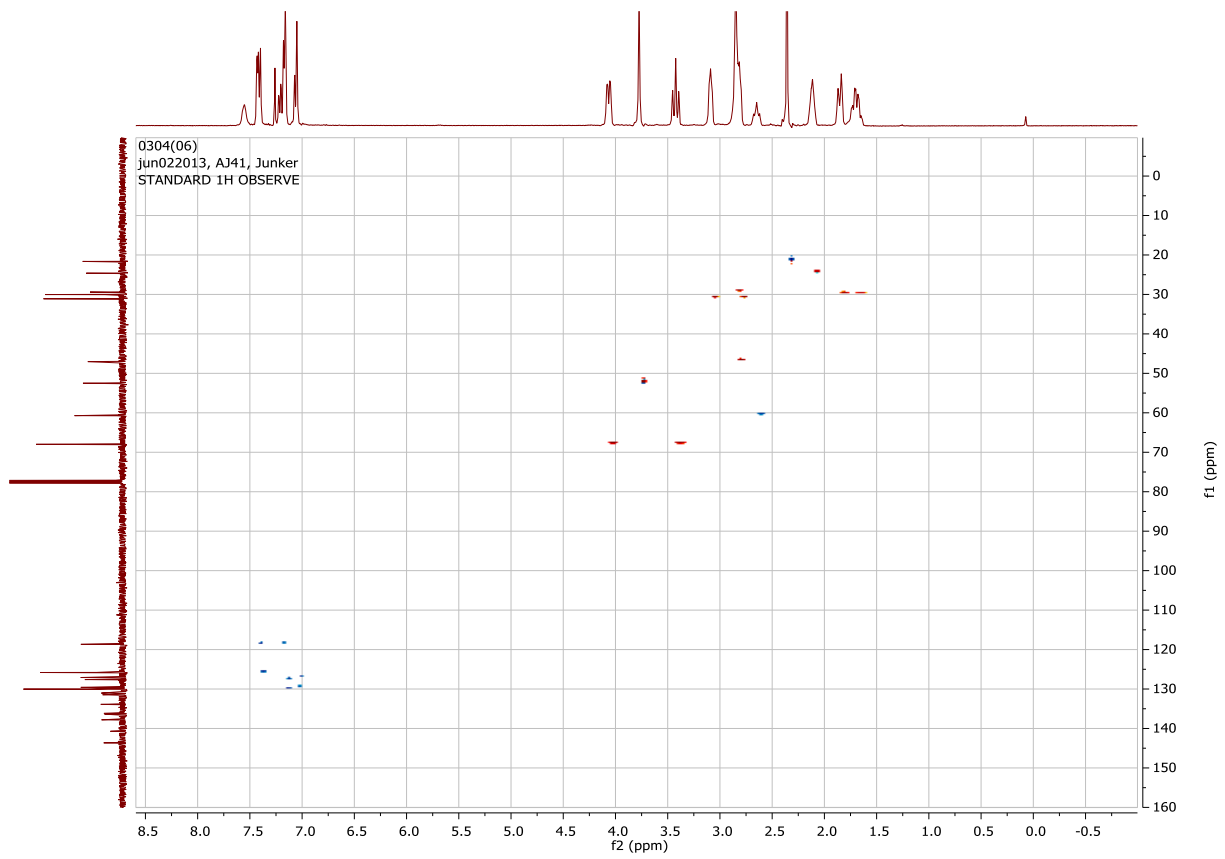

# HPLC

Analyzed: 18.07.12 22:04

Reported: 19.07.12 13:28

Processed: 19.07.12 13:28

Data Path: D:\WIN32APP\HSM\Chromni\DATA\5000\

Application: Chromni

Series: 5000

**Sample Name: AJ4101**

Vial Number: 4

Injection from this vial: 1 of 1

Vial Type: UNK

Volume: 5,0 ul

Chrom Type: HPLC Channel : 1

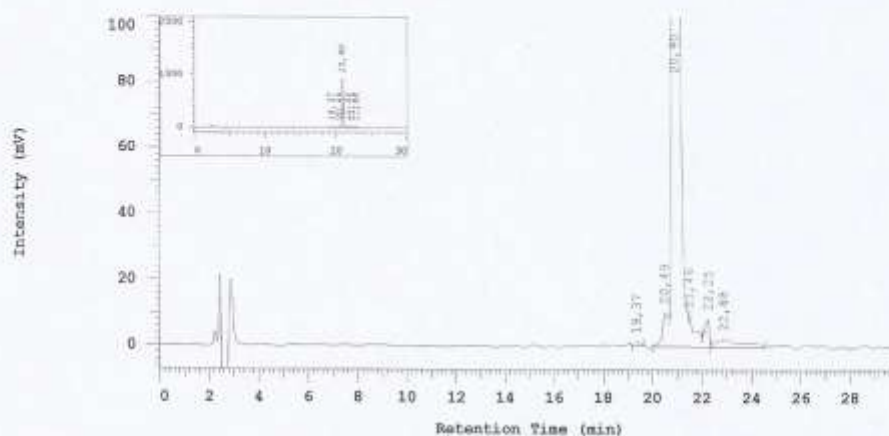

Acquisition Method: Chromni

Blank Subtr Sample Name: ACN

Column Type: 010

Solvent A: Wasser + 0,05%TFA

Developed by: Jens

Solvent B: ACN + 0,05%TFA

| No. | RT    | Area     | Conc 1   | BC |
|-----|-------|----------|----------|----|
| 1   | 19,37 | 16512    | 0,130    | MC |
| 2   | 20,49 | 178338   | 1,408    | MC |
| 3   | 20,90 | 12013283 | 94,848 ✓ | MC |
| 4   | 21,48 | 166125   | 1,312    | MC |
| 5   | 22,25 | 117703   | 0,929    | MC |
| 6   | 22,88 | 173882   | 1,373    | MC |
|     |       | 12665843 | 100,000  |    |

Peak rejection level: 0



## Generic Display Report

## Analysis Info

Analysis Name D:\Data\IPMC\PharmChemie\Routine\APCI\12\_08\WJU\_AJ41.d  
Method APCI\_directprobe\_positiv.m  
Sample Name AJ41  
Comment Junker  
APCI-Direkt  
Kalibration mit Fettsaeureestern

Acquisition Date 8/29/2012 9:25:00 AM

Operator Meiners

Instrument micrOTOF-Q II

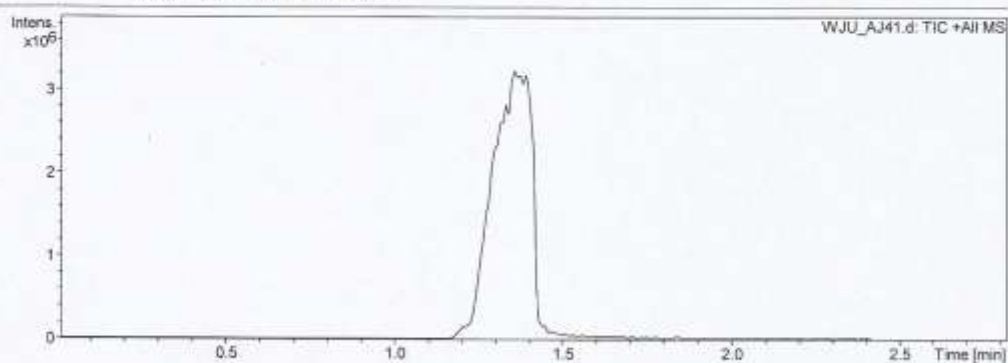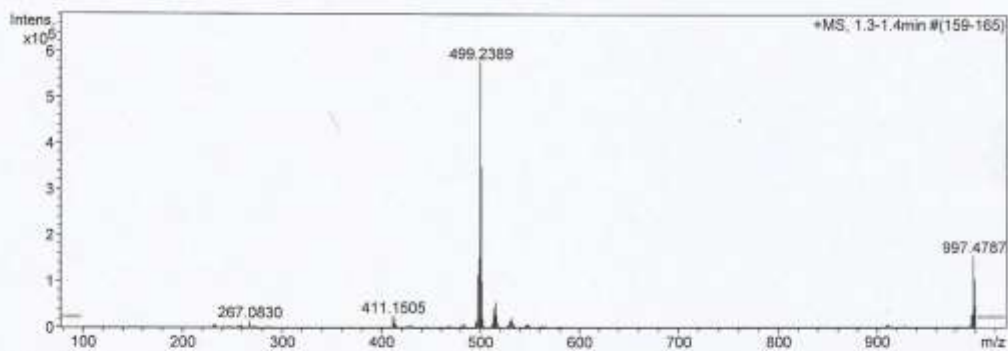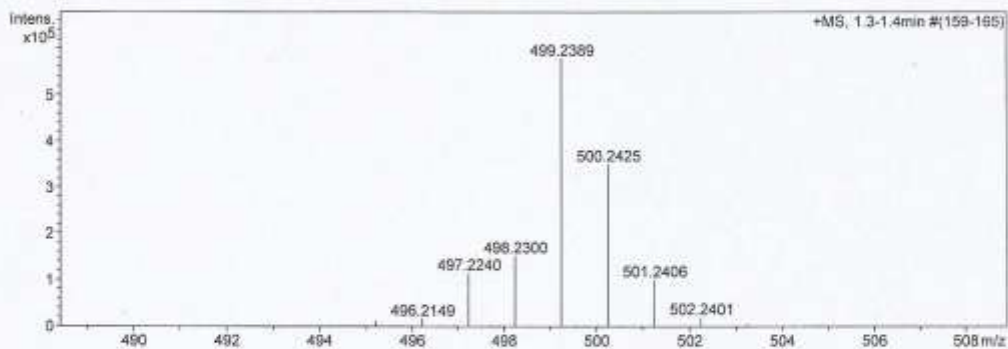

# Mass Spectrum SmartFormula Report

## Analysis Info

Analysis Name D:\Data\IPMC\PharmChemie\Routine\APCI\12\_08\WJU\_AJ41.d  
 Method APCI\_directprobe\_positiv.m  
 Sample Name AJ41  
 Comment Junker  
 APCI-Direkt  
 Kalibration mit Fettsaeureestern

Acquisition Date 8/29/2012 9:25:00 AM

Operator Meiners

Instrument / Ser# microTOF-Q II 10252

## Acquisition Parameter

|             |            |                       |           |                  |           |
|-------------|------------|-----------------------|-----------|------------------|-----------|
| Source Type | APCI       | Ion Polarity          | Positive  | Set Nebulizer    | 0.7 Bar   |
| Focus       | Not active | Set Capillary         | 4000 V    | Set Dry Heater   | 200 °C    |
| Scan Begin  | 100 m/z    | Set End Plate Offset  | +500 V    | Set Dry Gas      | 3.0 l/min |
| Scan End    | 1000 m/z   | Set Collision Cell RF | 130.0 Vpp | Set Divert Valve | Waste     |

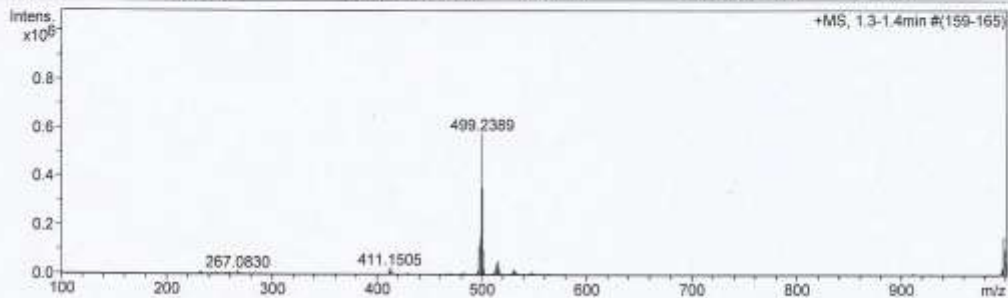

| Meas. m/z | #  | Formula                                                                       | Score  | m/z      | err [mDa] | err [ppm] | mSigma | rdB  | e <sup>-</sup> | Conf | N-Rule |
|-----------|----|-------------------------------------------------------------------------------|--------|----------|-----------|-----------|--------|------|----------------|------|--------|
| 499.2389  | 1  | C <sub>31</sub> H <sub>35</sub> N <sub>2</sub> O <sub>2</sub> S               | 49.01  | 499.2414 | 2.5       | 4.9       | 129.6  | 15.5 | even           |      | ok     |
|           | 2  | C <sub>26</sub> H <sub>43</sub> O <sub>3</sub> S <sub>3</sub>                 | 58.43  | 499.2369 | -2.0      | -4.1      | 132.7  | 5.5  | even           |      | ok     |
|           | 3  | C <sub>27</sub> H <sub>31</sub> N <sub>8</sub> S                              | 100.00 | 499.2387 | -0.2      | -0.4      | 141.5  | 16.5 | even           |      | ok     |
|           | 4  | C <sub>23</sub> H <sub>47</sub> O <sub>3</sub> S <sub>4</sub>                 | 42.39  | 499.2403 | 1.3       | 2.7       | 145.6  | 0.5  | even           |      | ok     |
|           | 5  | C <sub>24</sub> H <sub>35</sub> N <sub>8</sub> S <sub>2</sub>                 | 7.51   | 499.2421 | 3.2       | 6.3       | 149.6  | 11.5 | even           |      | ok     |
|           | 6  | C <sub>26</sub> H <sub>35</sub> N <sub>4</sub> O <sub>4</sub> S               | 21.76  | 499.2374 | -1.6      | -3.1      | 153.7  | 11.5 | even           |      | ok     |
|           | 7  | C <sub>19</sub> H <sub>43</sub> N <sub>6</sub> O <sub>5</sub> S <sub>4</sub>  | 24.27  | 499.2376 | -1.3      | -2.7      | 154.2  | 1.5  | even           |      | ok     |
|           | 8  | C <sub>23</sub> H <sub>39</sub> N <sub>4</sub> O <sub>4</sub> S <sub>2</sub>  | 10.24  | 499.2407 | 1.8       | 3.6       | 162.0  | 6.5  | even           |      | ok     |
|           | 9  | C <sub>16</sub> H <sub>39</sub> N <sub>10</sub> O <sub>2</sub> S <sub>3</sub> | 5.00   | 499.2414 | 2.5       | 5.0       | 164.5  | 2.5  | even           |      | ok     |
|           | 10 | C <sub>25</sub> H <sub>39</sub> O <sub>8</sub> S                              | 3.19   | 499.2360 | -2.9      | -5.8      | 165.8  | 6.5  | even           |      | ok     |
|           | 11 | C <sub>19</sub> H <sub>35</sub> N <sub>10</sub> O <sub>2</sub> S <sub>2</sub> | 8.22   | 499.2380 | -0.9      | -1.7      | 173.4  | 7.5  | even           |      | ok     |
|           | 12 | C <sub>12</sub> H <sub>35</sub> N <sub>16</sub> S <sub>3</sub>                | 10.75  | 499.2387 | -0.2      | -0.4      | 174.2  | 3.5  | even           |      | ok     |
|           | 13 | C <sub>22</sub> H <sub>43</sub> O <sub>8</sub> S <sub>2</sub>                 | 9.27   | 499.2394 | 0.5       | 1.0       | 174.4  | 1.5  | even           |      | ok     |
|           | 14 | C <sub>15</sub> H <sub>31</sub> N <sub>16</sub> S <sub>2</sub>                | 0.39   | 499.2354 | -3.6      | -7.1      | 184.8  | 8.5  | even           |      | ok     |
|           | 15 | C <sub>18</sub> H <sub>39</sub> N <sub>6</sub> O <sub>6</sub> S <sub>2</sub>  | 1.30   | 499.2367 | -2.2      | -4.4      | 185.7  | 2.5  | even           |      | ok     |
|           | 16 | C <sub>16</sub> H <sub>31</sub> N <sub>14</sub> O <sub>3</sub> S              | 0.43   | 499.2419 | 3.0       | 5.9       | 191.2  | 8.5  | even           |      | ok     |
|           | 17 | C <sub>15</sub> H <sub>35</sub> N <sub>10</sub> O <sub>7</sub> S              | 0.46   | 499.2405 | 1.8       | 3.3       | 203.0  | 3.5  | even           |      | ok     |
|           | 18 | C <sub>12</sub> H <sub>27</sub> N <sub>20</sub> O <sub>5</sub> S              | 0.88   | 499.2392 | 0.3       | 0.6       | 204.8  | 9.5  | even           |      | ok     |
|           | 19 | C <sub>11</sub> H <sub>31</sub> N <sub>16</sub> O <sub>5</sub> S              | 0.25   | 499.2379 | -1.1      | -2.1      | 214.6  | 4.5  | even           |      | ok     |

*N*-{4-[*N*-Methyl-*N*-(tetrahydro-2*H*-pyran-4-yl)aminomethyl]phenyl}-2-(3-methylphenyl)-7,8-dihydro-6*H*-[7]annuleno[*b*]thiophene-5-carboxamide (**14d**)

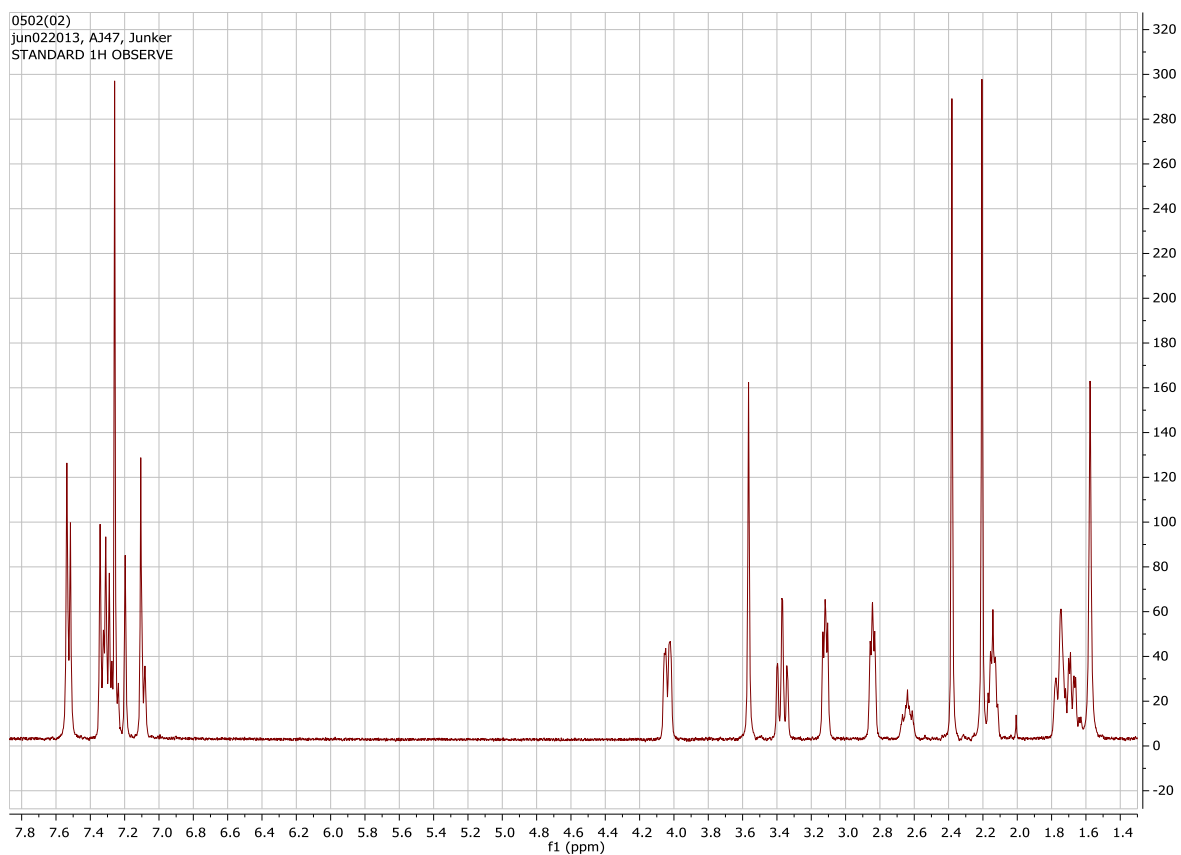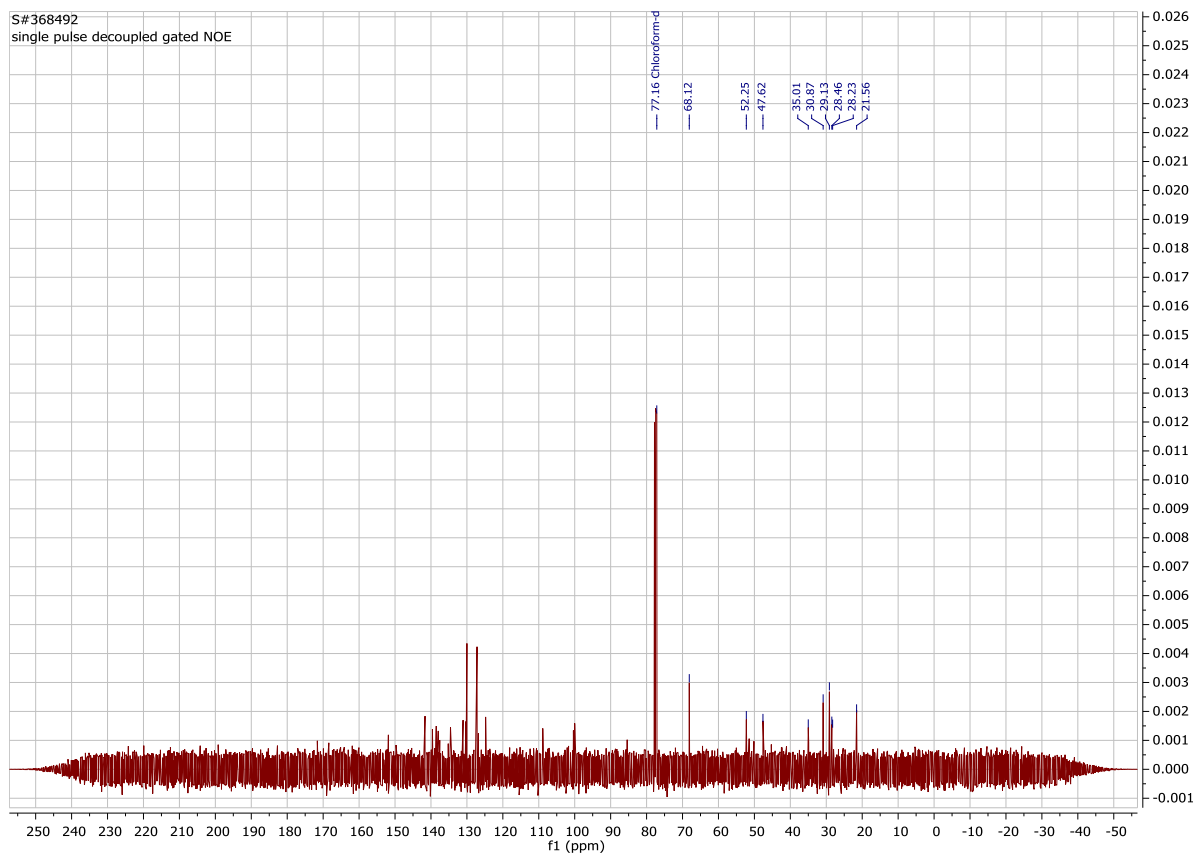

S136

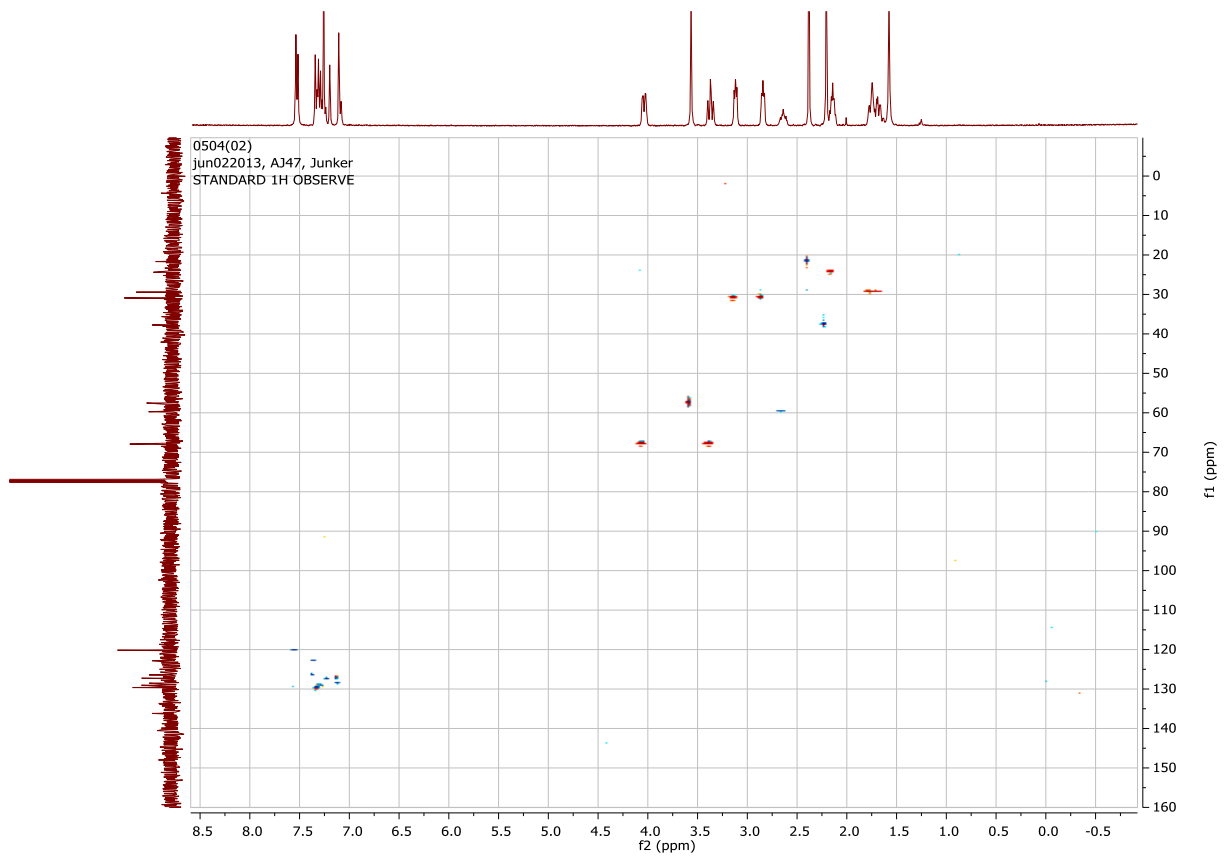

# HPLC

Analyzed: 19.07.12 00:08

Reported: 19.07.12 13:32

Processed: 19.07.12 13:32

Data Path: D:\WIN32APP\HSM\Chromni\DATA\5003\

Application: Chromni

Series: 5003

Sample Name: AJ4701

Vial Number: 7

Injection from this vial: 1 of 1

Vial Type: UNK

Volume: 5,0 ul

Chrom Type: HPLC Channel : 1

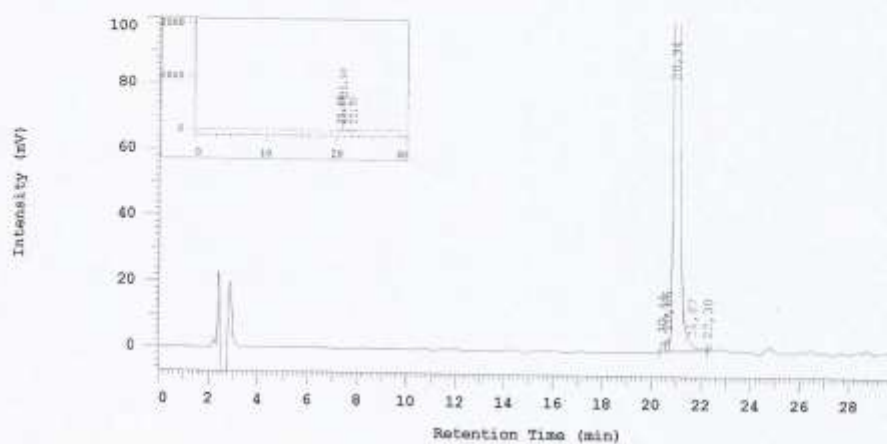

Acquisition Method: Chromni

Blank Subtr Sample Name: ACN

Column Type: 010

Solvent A: Wasser + 0,05%TFA

Developed by: Jens

Solvent B: ACN + 0,05%TFA

| No. | RT    | Area    | Conc 1  | BC |
|-----|-------|---------|---------|----|
| 1   | 20,46 | 25001   | 0,408   | MC |
| 2   | 20,66 | 30570   | 0,499   | MC |
| 3   | 20,94 | 5933442 | 96,905✓ | MC |
| 4   | 21,67 | 128176  | 2,093   | MC |
| 5   | 22,30 | 5741    | 0,094   | MC |
|     |       | 6122930 | 100,000 |    |

Peak rejection level: 0

## Generic Display Report

## Analysis Info

Analysis Name D:\Data\IPMC\PharmChemie\Routine\APC\12\_08\WJU\_AJ47.d  
Method APCI\_directprobe\_positiv.m  
Sample Name AJ47  
Comment Junker  
APCI-Direkt  
Kalibration mit Fettsaeureestern

Acquisition Date 8/29/2012 8:37:55 AM

Operator Meiners  
Instrument micrOTOF-Q II

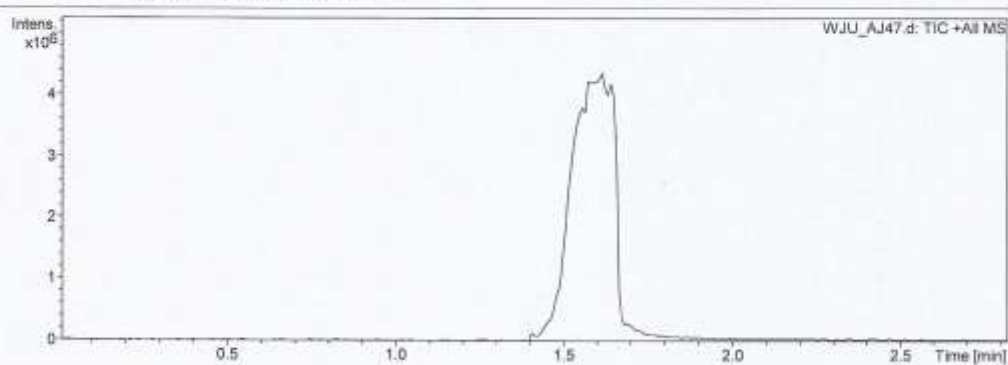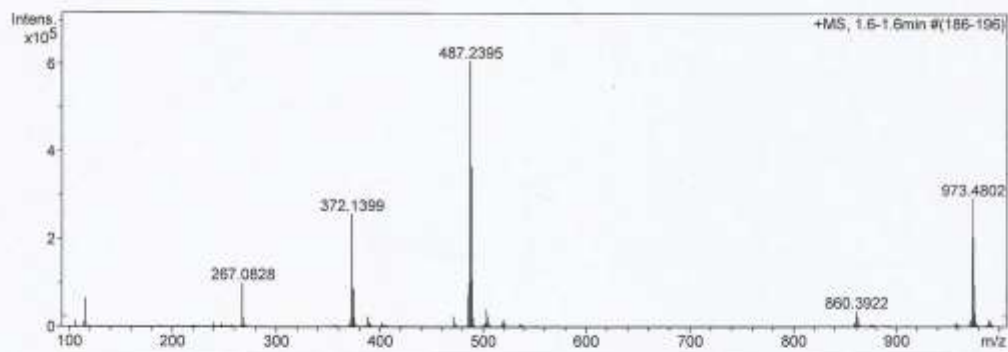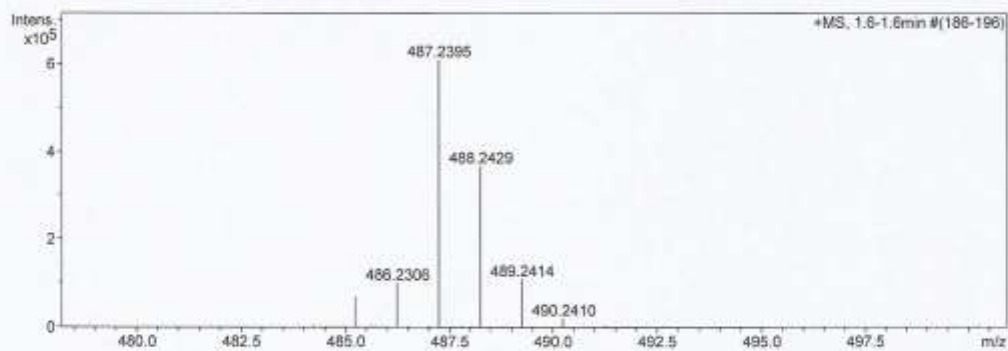

# Mass Spectrum SmartFormula Report

## Analysis Info

Analysis Name D:\Data\PMC\PharmChemie\Routine\APCI\12\_08\WJU\_AJ47.d  
 Method APCI\_directprobe\_positiv.m  
 Sample Name AJ47  
 Comment Junker  
 APCI-Direkt  
 Kalibration mit Fettsaeureestern

Acquisition Date 8/29/2012 8:37:55 AM

Operator Meiners

Instrument / Ser# micrOTOF-Q II 10252

## Acquisition Parameter

|             |            |                       |           |                  |           |
|-------------|------------|-----------------------|-----------|------------------|-----------|
| Source Type | APCI       | Ion Polarity          | Positive  | Set Nebulizer    | 0.7 Bar   |
| Focus       | Not active | Set Capillary         | 4000 V    | Set Dry Heater   | 200 °C    |
| Scan Begin  | 100 m/z    | Set End Plate Offset  | -500 V    | Set Dry Gas      | 3.0 l/min |
| Scan End    | 1000 m/z   | Set Collision Cell RF | 130.0 Vpp | Set Divert Valve | Waste     |

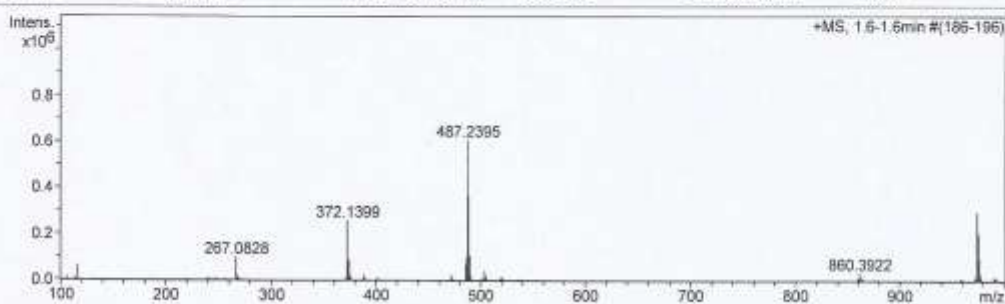

| Meas. m/z | #  | Formula                                                                       | Score  | m/z      | err [mDa] | err [ppm] | mSigma | rdB  | a <sup>-</sup> | Conf | N-Rule |
|-----------|----|-------------------------------------------------------------------------------|--------|----------|-----------|-----------|--------|------|----------------|------|--------|
| 487.2395  | 1  | C <sub>30</sub> H <sub>35</sub> N <sub>2</sub> O <sub>2</sub> S               | 100.00 | 487.2414 | 1.9       | 3.8       | 134.4  | 14.5 | even           |      | ok     |
|           | 2  | C <sub>25</sub> H <sub>43</sub> O <sub>3</sub> S <sub>3</sub>                 | 48.64  | 487.2369 | -2.6      | -5.4      | 135.9  | 4.5  | even           |      | ok     |
|           | 3  | C <sub>26</sub> H <sub>31</sub> N <sub>6</sub> S                              | 90.65  | 487.2387 | -0.8      | -1.7      | 146.5  | 15.5 | even           |      | ok     |
|           | 4  | C <sub>22</sub> H <sub>47</sub> O <sub>3</sub> S <sub>4</sub>                 | 84.91  | 487.2403 | 0.7       | 1.5       | 148.3  | -0.5 | even           |      | ok     |
|           | 5  | C <sub>23</sub> H <sub>35</sub> N <sub>6</sub> S <sub>2</sub>                 | 16.68  | 487.2421 | 2.5       | 5.2       | 154.0  | 10.5 | even           |      | ok     |
|           | 6  | C <sub>18</sub> H <sub>43</sub> N <sub>6</sub> O <sub>4</sub> S <sub>4</sub>  | 21.86  | 487.2376 | -1.9      | -4.0      | 157.1  | 0.5  | even           |      | ok     |
|           | 7  | C <sub>19</sub> H <sub>43</sub> N <sub>4</sub> O <sub>4</sub> S <sub>3</sub>  | 1.38   | 487.2441 | 4.6       | 9.4       | 158.2  | 0.5  | even           |      | ok     |
|           | 8  | C <sub>25</sub> H <sub>35</sub> N <sub>4</sub> O <sub>4</sub> S               | 16.80  | 487.2374 | -2.2      | -4.4      | 158.5  | 10.5 | even           |      | ok     |
|           | 9  | C <sub>22</sub> H <sub>39</sub> N <sub>4</sub> O <sub>4</sub> S <sub>2</sub>  | 19.00  | 487.2407 | 1.2       | 2.5       | 166.3  | 5.5  | even           |      | ok     |
|           | 10 | C <sub>15</sub> H <sub>39</sub> N <sub>10</sub> O <sub>2</sub> S <sub>3</sub> | 10.64  | 487.2414 | 1.9       | 3.9       | 167.9  | 1.5  | even           |      | ok     |
|           | 11 | C <sub>21</sub> H <sub>31</sub> N <sub>10</sub> O <sub>2</sub> S              | 0.40   | 487.2347 | -4.9      | -10.0     | 170.3  | 11.5 | even           |      | ok     |
|           | 12 | C <sub>24</sub> H <sub>39</sub> O <sub>6</sub> S                              | 2.05   | 487.2360 | -3.5      | -7.2      | 170.5  | 5.5  | even           |      | ok     |
|           | 13 | C <sub>18</sub> H <sub>35</sub> N <sub>10</sub> O <sub>2</sub> S <sub>2</sub> | 6.88   | 487.2380 | -1.5      | -3.0      | 177.7  | 6.5  | even           |      | ok     |
|           | 14 | C <sub>21</sub> H <sub>43</sub> O <sub>6</sub> S <sub>2</sub>                 | 13.17  | 487.2394 | -0.1      | -0.3      | 178.7  | 0.5  | even           |      | ok     |
|           | 15 | C <sub>14</sub> H <sub>31</sub> N <sub>16</sub> S <sub>2</sub>                | 0.23   | 487.2354 | -4.2      | -8.6      | 189.2  | 7.5  | even           |      | ok     |
|           | 16 | C <sub>17</sub> H <sub>39</sub> N <sub>6</sub> O <sub>6</sub> S <sub>2</sub>  | 0.91   | 487.2367 | -2.8      | -5.8      | 190.0  | 1.5  | even           |      | ok     |
|           | 17 | C <sub>15</sub> H <sub>31</sub> N <sub>14</sub> O <sub>3</sub> S              | 0.84   | 487.2419 | 2.4       | 4.8       | 195.9  | 7.5  | even           |      | ok     |
|           | 18 | C <sub>18</sub> H <sub>39</sub> N <sub>4</sub> O <sub>9</sub> S               | 0.22   | 487.2432 | 3.7       | 7.6       | 196.0  | 1.5  | even           |      | ok     |
|           | 19 | C <sub>14</sub> H <sub>35</sub> N <sub>10</sub> O <sub>7</sub> S              | 0.79   | 487.2405 | 1.0       | 2.1       | 207.6  | 2.5  | even           |      | ok     |
|           | 20 | C <sub>11</sub> H <sub>27</sub> N <sub>20</sub> O <sub>5</sub>                | 0.95   | 487.2392 | -0.3      | -0.7      | 209.5  | 8.5  | even           |      | ok     |

2-(4-Butylphenyl)-N-[4-(piperidin-1-ylmethyl)phenyl]-7,8-dihydro-6H-

[7]annuleno[b]thiophene-5-carboxamide (**14g**)

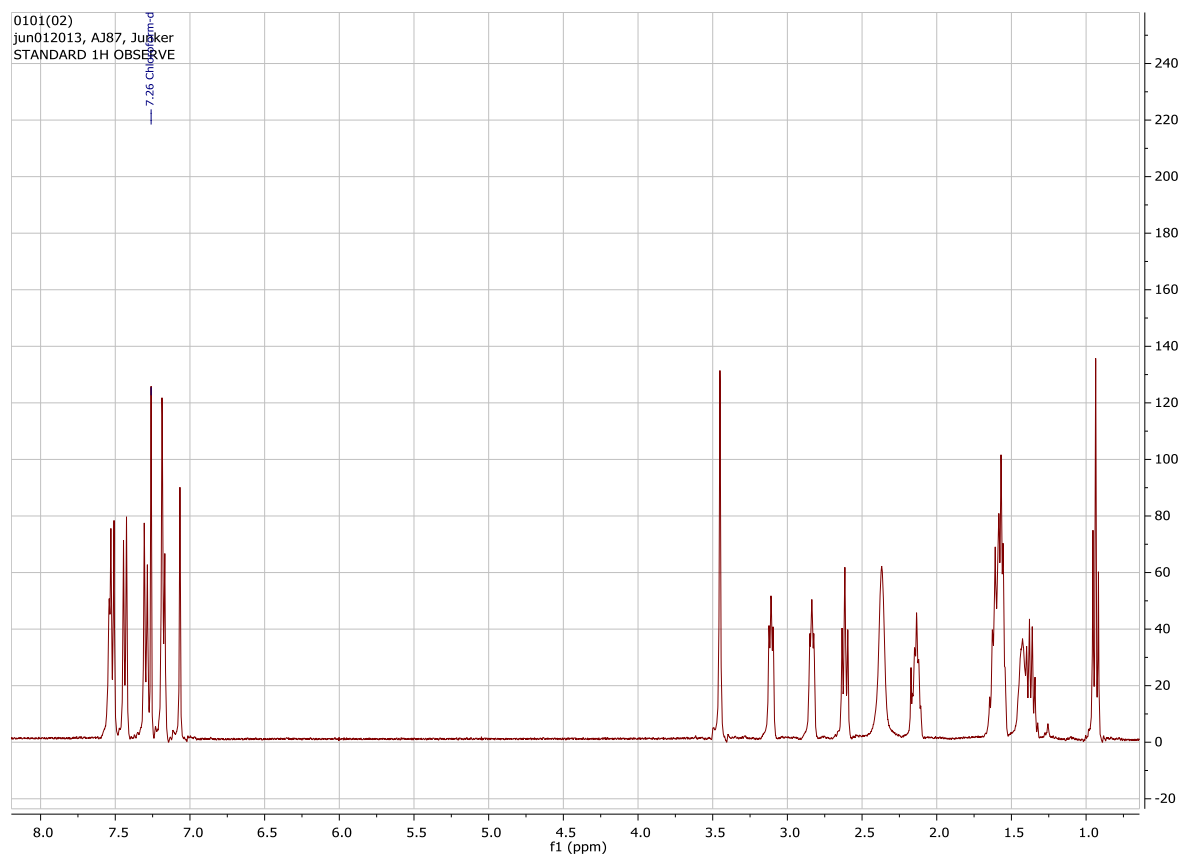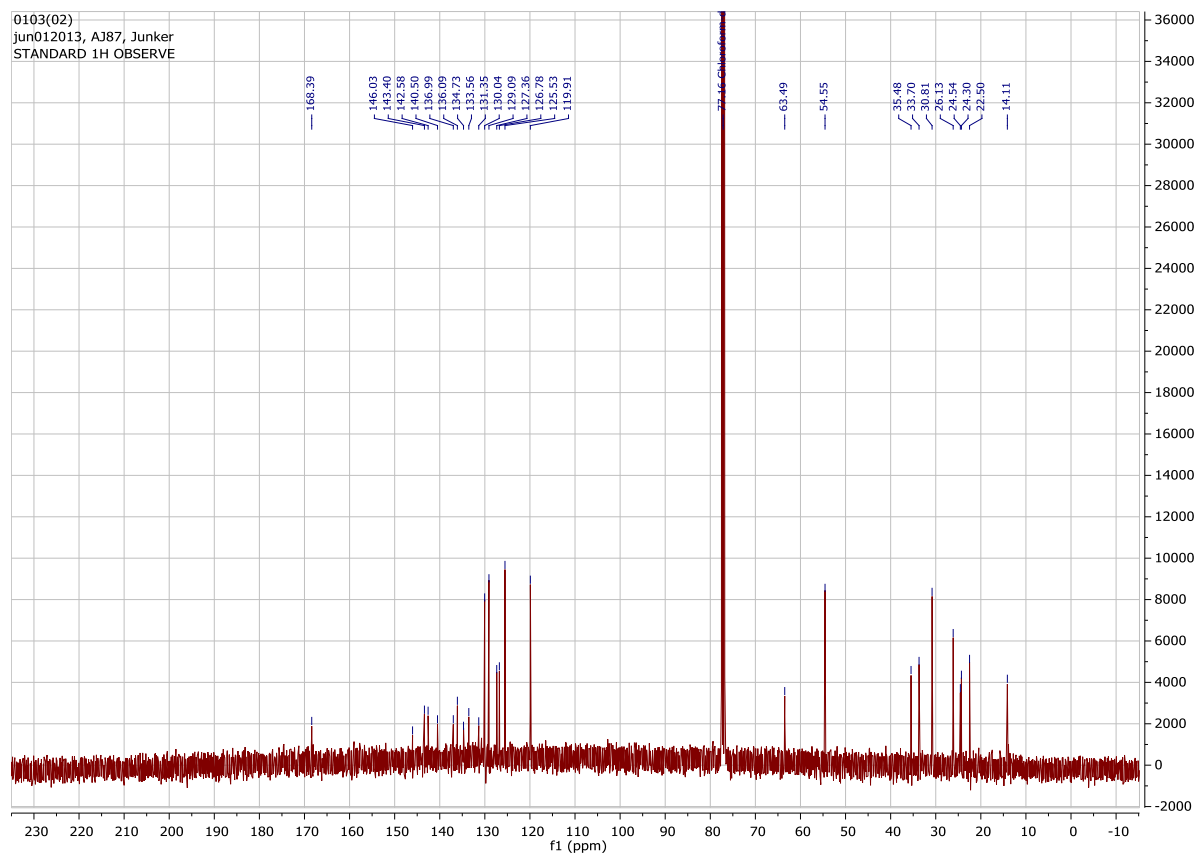



S141

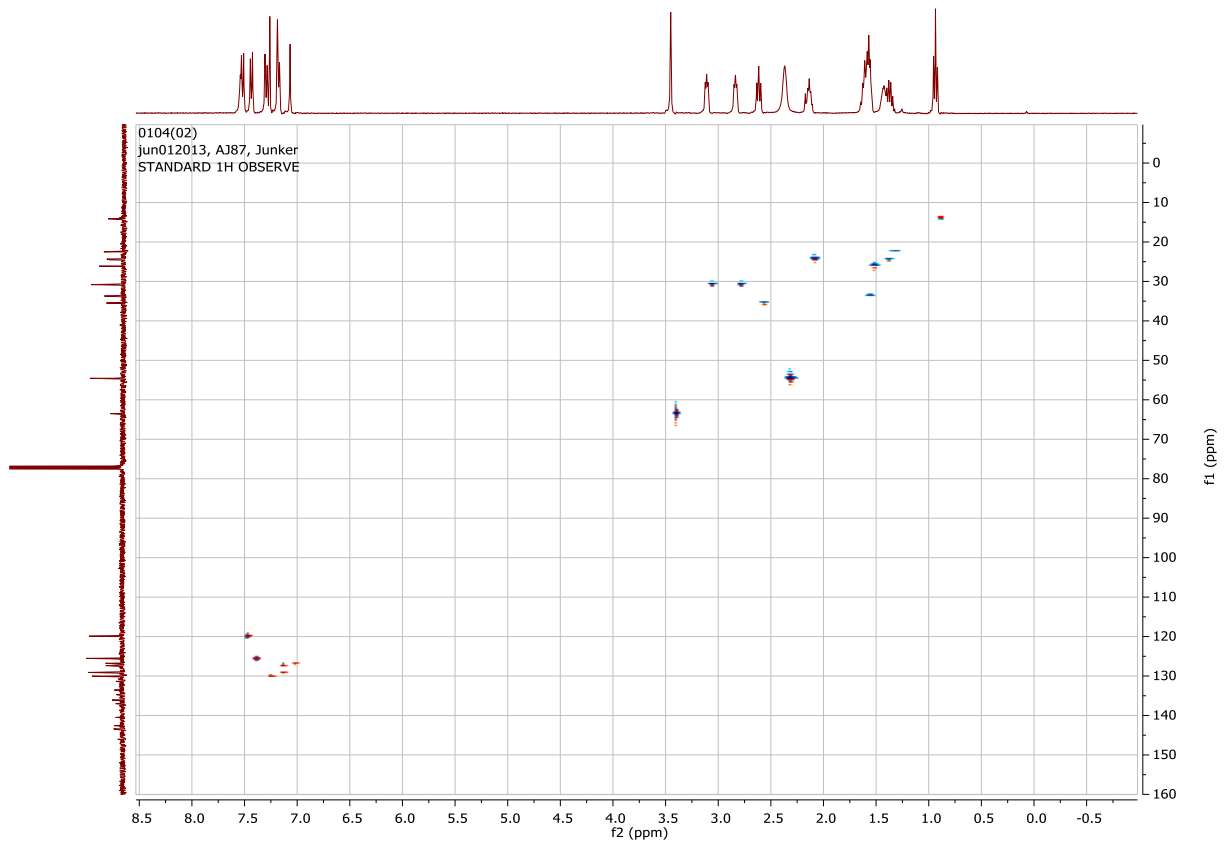

## HPLC

Analyzed: 10.01.13 03:21

Reported: 10.01.13 10:18  
Processed: 10.01.13 10:17

Data Path: D:\WIN32APP\HSM\Chromni\DATA\5799\

Application: Chromni

Sample Name: AJ 87

Injection from this vial: 1 of 1

Series: 5799

Vial Number: 8

Vial Type: UNK

Volume: 5,0 ul

Chrom Type: HPLC Channel : 1

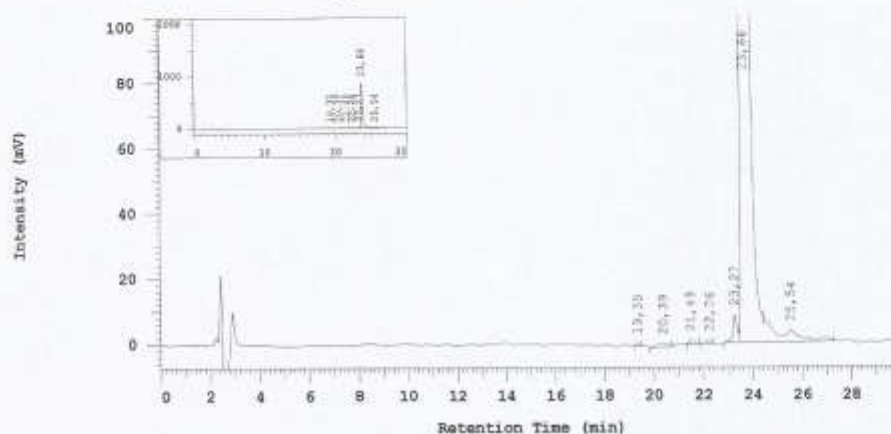

Acquisition Method: Chromni

Blank Subtr Sample Name: ACN

Column Type: 010

Solvent A: Wasser + 0,05%TFA

Developed by: Jens

Solvent B: ACN + 0,05%TFA

| No. | RT    | Area     | Conc 1  | BC |
|-----|-------|----------|---------|----|
| 1   | 19,35 | 8348     | 0,058   | MC |
| 2   | 20,39 | 29633    | 0,206   | MC |
| 3   | 21,49 | 15280    | 0,106   | BB |
| 4   | 22,26 | 14512    | 0,101   | MC |
| 5   | 23,27 | 97290    | 0,675   | MC |
| 6   | 23,66 | 13896507 | 96,435  | MC |
| 7   | 25,54 | 348676   | 2,420   | MC |
|     |       | 14410246 | 100,000 |    |

Peak rejection level: 0

→ NHR

## Generic Display Report

## Analysis Info

Analysis Name E:\Meiners\2013\_01\_14\AJ87\_BC4\_01\_9214.d  
Method tune\_low\_lcms\_routine\_positiv\_10min.m  
Sample Name AJ87  
Comment Junker  
Kalibration mit Li-Formate

Acquisition Date 1/14/2013 5:59:35 PM

Operator Meiners  
Instrument microTOF-Q II

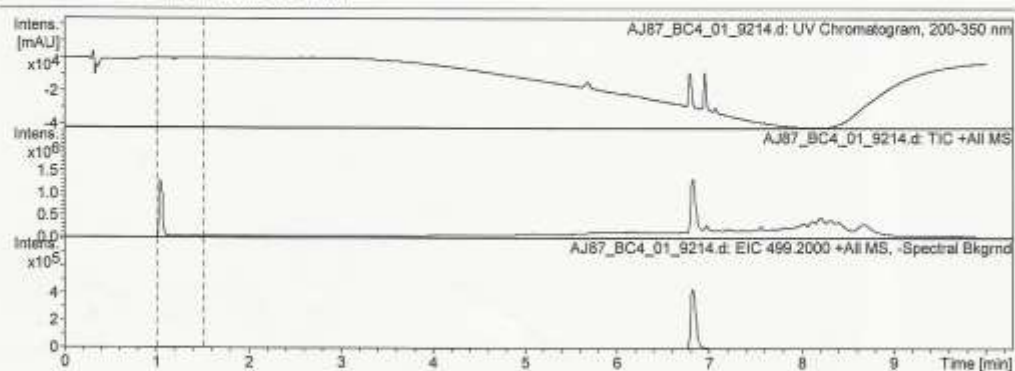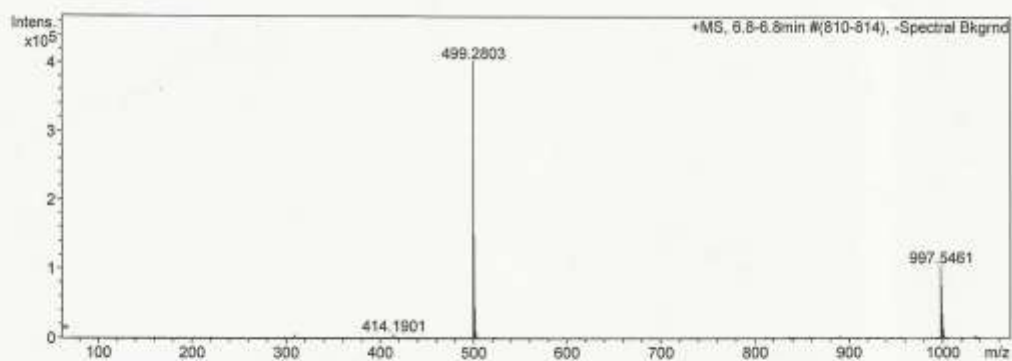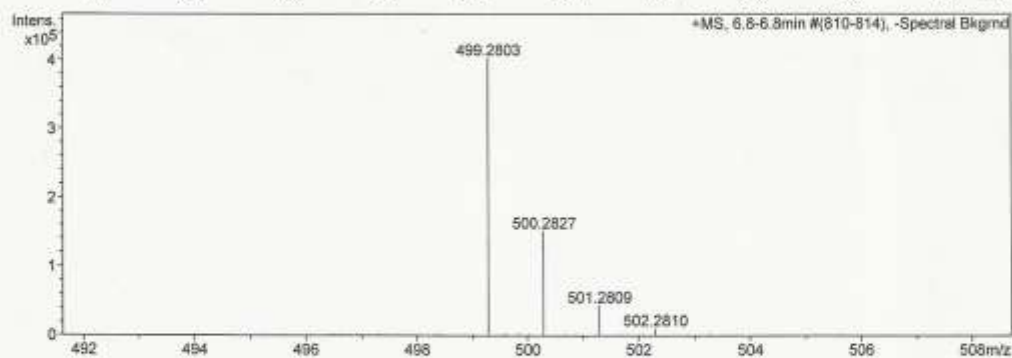

# Mass Spectrum SmartFormula Report

## Analysis Info

Analysis Name E:\Meiners\2013\_01\_14\AJ87\_BC4\_01\_9214.d  
 Method tune\_low\_lcms\_routine\_positiv\_10min.m  
 Sample Name AJ87  
 Comment Junker  
 Kalibration mit Li-Formate

Acquisition Date 1/14/2013 5:59:35 PM

Operator Meiners  
 Instrument / Ser# micrOTOF-Q II 10252

## Acquisition Parameter

|             |            |                       |           |                  |           |
|-------------|------------|-----------------------|-----------|------------------|-----------|
| Source Type | ESI        | Ion Polarity          | Positive  | Set Nebulizer    | 2.0 Bar   |
| Focus       | Not active | Set Capillary         | 4500 V    | Set Dry Heater   | 200 °C    |
| Scan Begin  | 100 m/z    | Set End Plate Offset  | -500 V    | Set Dry Gas      | 9.0 l/min |
| Scan End    | 1000 m/z   | Set Collision Cell RF | 300.0 Vpp | Set Divert Valve | Waste     |

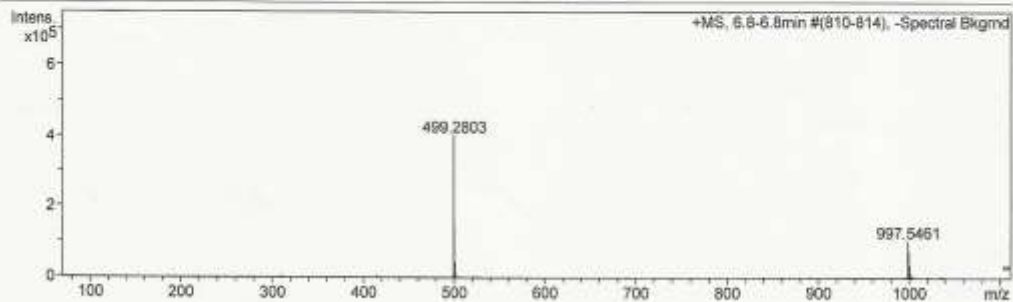

| Meas. m/z | # | Formula                                                       | Score  | m/z      | err [mDa] | err [ppm] | mSigma | rdB  | e <sup>-</sup> Conf | N-Rule |
|-----------|---|---------------------------------------------------------------|--------|----------|-----------|-----------|--------|------|---------------------|--------|
| 499.2803  | 1 | C <sub>32</sub> H <sub>39</sub> N <sub>2</sub> O <sub>5</sub> | 44.52  | 499.2778 | -2.5      | -5.1      | 4.3    | 14.5 | even                | ok     |
|           | 2 | C <sub>29</sub> H <sub>43</sub> N <sub>2</sub> O <sub>5</sub> | 100.00 | 499.2811 | 0.8       | 1.7       | 23.7   | 9.5  | even                | ok     |

2-(4-*tert*-Butylphenyl)-N-{4-[N-methyl-N-(tetrahydro-2H-pyran-4-yl)aminomethyl]phenyl}-  
7,8-dihydro-6H-[7]annuleno[b]thiophene-5-carboxamide (**14h**)

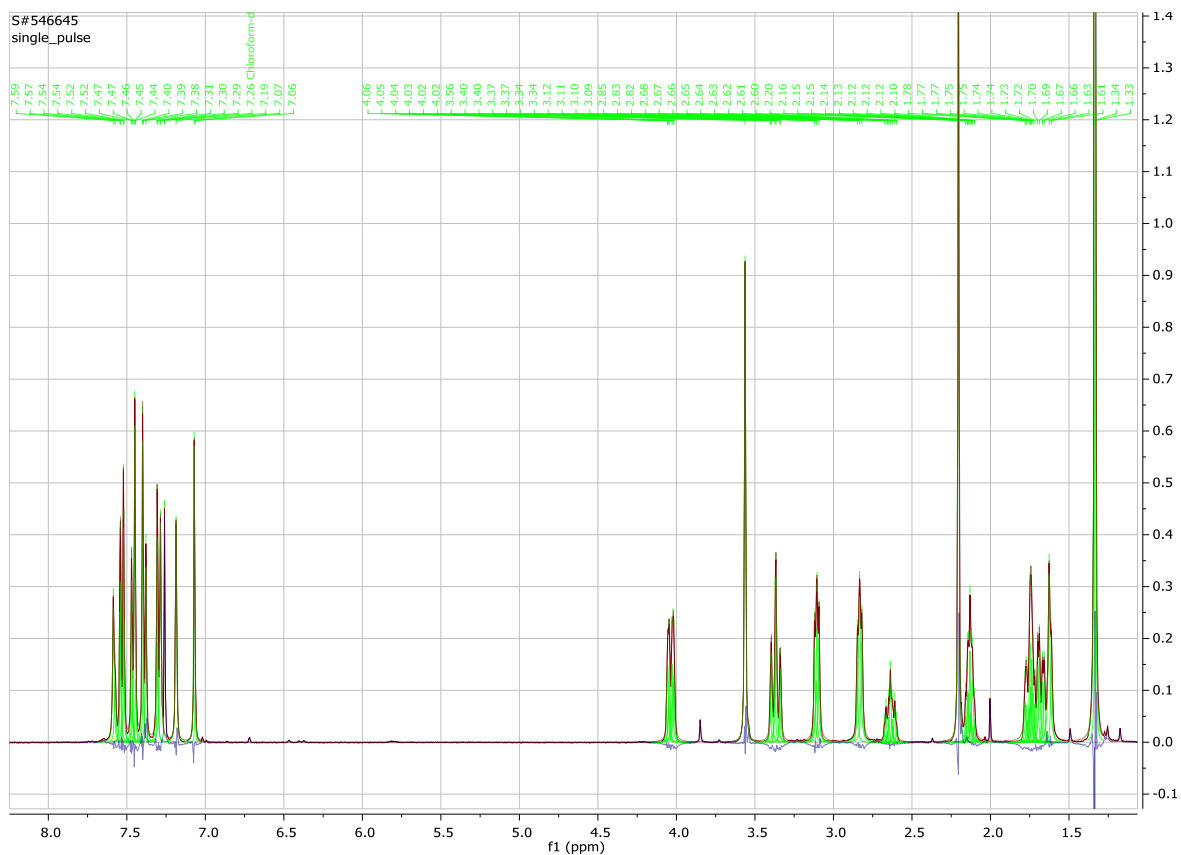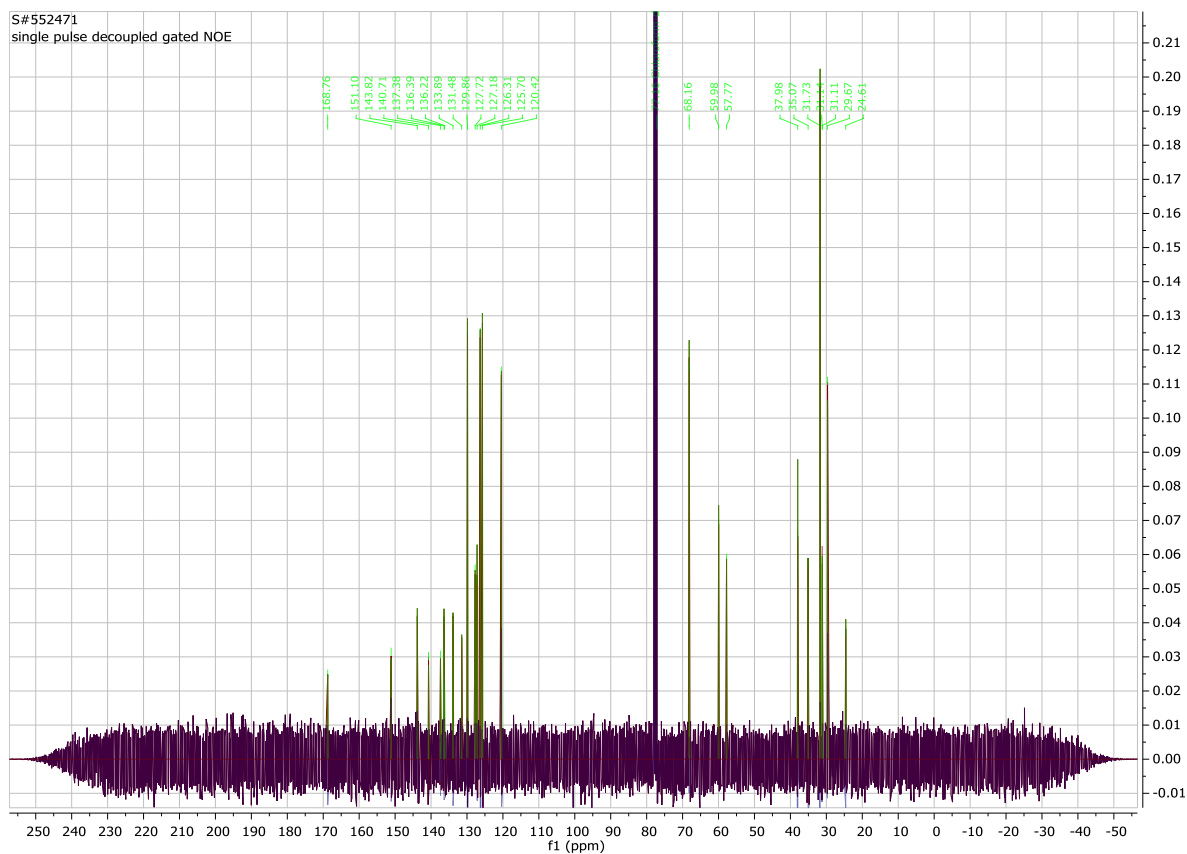

# HPLC

Analyzed: 19.07.12 01:31

Reported: 19.07.12 13:34  
Processed: 19.07.12 13:34

Data Path: D:\WIN32APP\HSM\Chromni\DATA\5005\

Application: Chromni

Series: 5005

**Sample Name: AJ7001**

Vial Number: 8

Injection from this vial: 1 of 1

Vial Type: UNK

Volume: 5,0 ul

Chrom Type: HPLC Channel : 1

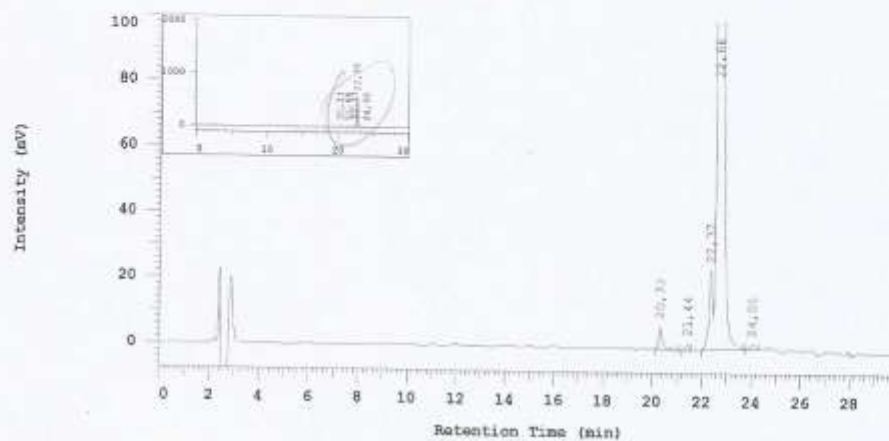

Acquisition Method: Chromni

Blank Subtr Sample Name: ACN

Column Type: 010

Solvent A: Wasser + 0,05%TFA

Developed by: Jens

Solvent B: ACN + 0,05%TFA

| No. | RT    | Area    | Conc 1   | BC |
|-----|-------|---------|----------|----|
| 1   | 20,33 | 75324   | 1,001    | BB |
| 2   | 21,44 | 17628   | 0,234    | MC |
| 3   | 22,37 | 240727  | 3,198    | MC |
| 4   | 22,66 | 7172172 | 95,281 ✓ | MC |
| 5   | 24,05 | 21550   | 0,286    | MC |
|     |       | 7527401 | 100,000  |    |

Peak rejection level: 0

## Generic Display Report

## Analysis Info

Analysis Name E:\Meiners\2013\_01\_28\AJ70\_BA8\_01\_9403.d  
Method tune\_low\_lcms\_routine\_positiv\_10min.m  
Sample Name AJ70  
Comment Junker  
LCMS-ESI+  
Kalibration mit Li-Formate

Acquisition Date 1/28/2013 3:27:48 PM

Operator Meiners  
Instrument micrOTOF-Q II

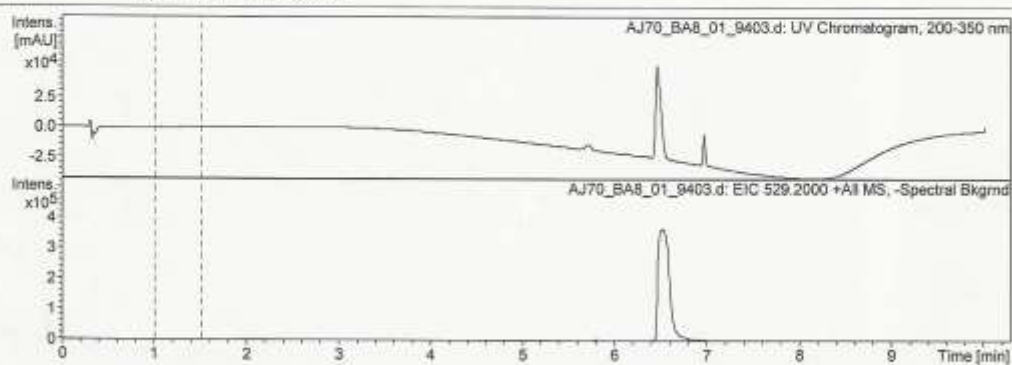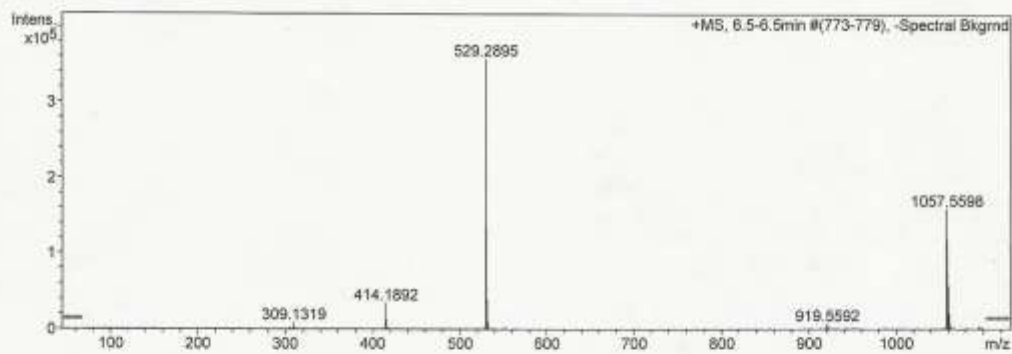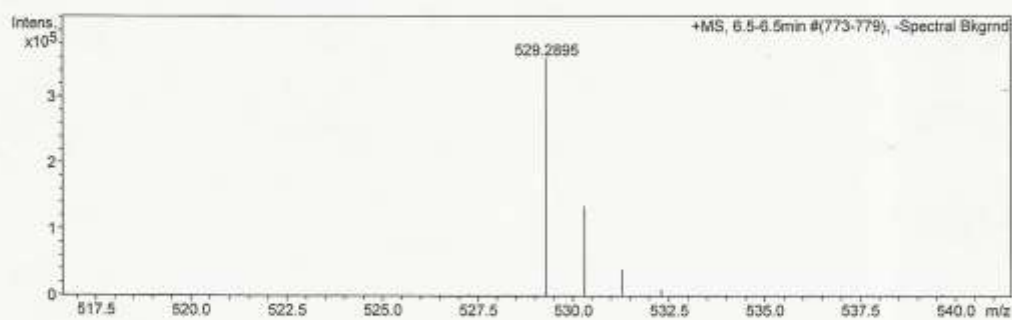

# Mass Spectrum SmartFormula Report

## Analysis Info

Analysis Name E:\Meiners\2013\_01\_28\AJ70\_BA8\_01\_9403.d  
Method tune\_low\_lcms\_routine\_positiv\_10min.m  
Sample Name AJ70  
Comment Junker  
LCMS-ESI+  
Kalibration mit Li-Formate

Acquisition Date 1/28/2013 3:27:48 PM

Operator Meiners  
Instrument / Ser# micrOTOF-Q II 10252

## Acquisition Parameter

|             |            |                       |           |                  |           |
|-------------|------------|-----------------------|-----------|------------------|-----------|
| Source Type | ESI        | Ion Polarity          | Positive  | Set Nebulizer    | 2.0 Bar   |
| Focus       | Not active | Set Capillary         | 4500 V    | Set Dry Heater   | 200 °C    |
| Scan Begin  | 100 m/z    | Set End Plate Offset  | -500 V    | Set Dry Gas      | 9.0 l/min |
| Scan End    | 1000 m/z   | Set Collision Cell RF | 300.0 Vpp | Set Divert Valve | Waste     |

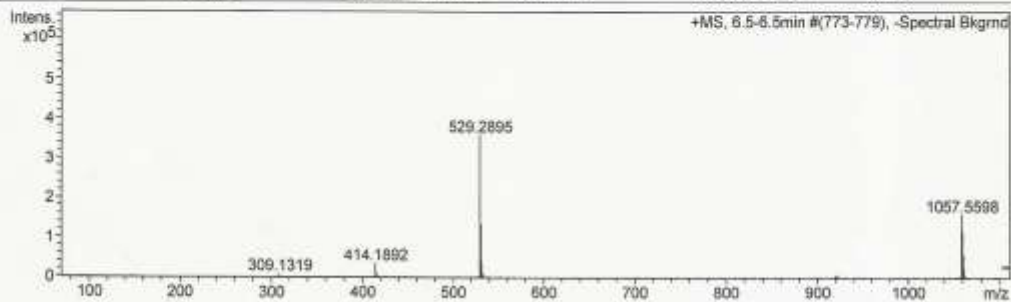

| Meas. m/z | # | Formula                                                                      | Score  | m/z      | err [mDa] | err [ppm] | mSigma | rdB  | e <sup>-</sup> Conf | N-Rule |
|-----------|---|------------------------------------------------------------------------------|--------|----------|-----------|-----------|--------|------|---------------------|--------|
| 529.2895  | 1 | C <sub>33</sub> H <sub>41</sub> N <sub>2</sub> O <sub>2</sub> S              | 100.00 | 529.2883 | -1.2      | -2.3      | 4.9    | 14.5 | even                | ok     |
|           | 2 | C <sub>29</sub> H <sub>37</sub> N <sub>8</sub> S                             | 8.80   | 529.2856 | -3.9      | -7.4      | 8.9    | 15.5 | even                | ok     |
|           | 3 | C <sub>30</sub> H <sub>45</sub> N <sub>2</sub> O <sub>2</sub> S <sub>2</sub> | 35.88  | 529.2917 | 2.2       | 4.1       | 23.0   | 9.5  | even                | ok     |
|           | 4 | C <sub>38</sub> H <sub>41</sub> S                                            | 19.48  | 529.2923 | 2.8       | 5.3       | 25.1   | 18.5 | even                | ok     |
